# Supplementary material for: Calculating the Strength of Solar Cycle 25: 365-Day High-Resolution Sunspot Smoothing and its Relationship with the 10.7cm Solar Flux
Source: Research Square preprint supplement (doi:10.21203/rs.3.rs-5148729/v1), 2025-03-25
Supplement: Supplementary file 3 [file 39102010c3a7795df4b763a9.xlsx]

## Sheet: TABLE 2
YEAR	MONTH	YEAR	MEAN	SUNSPOT		WDC	FITTED	SMOOTHED	SMOOTHED	% DIFF	% DIFF		H-G		% DIFF	% DIFF	% DIFF	% DIFF/
			SUNSPO	UMBER		STP	ADJUSTED	ADJUSTED	FITTED	SMOOTHED	SMOOTHED				FITTED	FITTED	HIGHEST
			NUMBER	*0,635			FLUX	FLUX	ADJUSTED	FITTED	FITTED				AND	AND	FITTED	SMOOTHED
1947	3		183.8	116.713	64	233.4	180.713		FLUX	ADJUSTED	ADJUSTED		-52.687		ADJUSTED	ADJUSTED	AND	FITTED VS
1947	4		212.1	134.684	64	265.8	198.684			FLUX	FLUX		-67.1165		FLUX	FLUX	HIGHEST	SMOOTHED
1947	5		285	180.975	64	267.1	244.975			AND	AND		-22.125				ADJUSTED	SOLAR
1947	6		232.1	147.383	64	233.8	211.383			SMOOTHED	SMOOTHED		-22.4165				FLUX	FLUX
1947	7		223.5	141.923	64	222.3	205.923			ADJUSTED	ADJUSTED		-16.3775		TABLE 4	TABLE 4	TABLE 5	TABLE 11
1947	8		267.4	169.799	64	237.1	233.799			FLUX	FLUX		-3.301		SMOOTHED	SMOOTHED	SMOOTHED	SMOOTHED
1947	9		239.9	152.337	64	201.9	216.337	203.996	194.839	TABLE 2	TABLE 2		14.4365		ADJUSTED	ADJUSTED	ADJUSTED	ADJUSTED
1947	10		231.7	147.13	64	207.7	211.13	197.521	195.022	SMOOTHED	SMOOTHED		3.4295		FLUX	FLUX	FLUX	FLUX
1947	11		181.3	115.126	64	175.8	179.125	193.696	195.493	ADJUSTED	ADJUSTED		3.3255		ABOVE	ABOVE	ABOVE	ABOVE
1947	12		164.9	104.712	64	171	168.712	190.875	194.614	FLUX	FLUX		-2.2885		115	115	115	115
1948	1		153.6	97.536	64	150.7	161.536	188.142	194.172	ABOVE	ABOVE		10.836
1948	2		122	77.47	64	131	141.47	184.246	192.431	115	115		10.47
1948	3		134.3	85.2805	64	134.1	149.281	180.238	190.296				15.1805
1948	4		268.5	170.498	64	209.7	234.498	176.654	188.291				24.7975
1948	5		246.4	156.464	64	231.4	220.464	174	186.055				-10.936
1948	6		237.5	150.812	64	201.8	214.812	174.096	185.65				13.0125
1948	7		201.4	127.889	64	188.7	191.889	175.9	186.851				3.189
1948	8		223.7	142.049	64	177.2	206.049	180.517	190.847				28.8495
1948	9		202.9	128.841	64	165.6	192.841	186.829	196.792				27.2415
1948	10		192.9	122.492	64	158	186.492	188.571	197.54				28.4915
1948	11		135.6	86.106	64	161.8	150.106	184.446	193.402				-11.694
1948	12		195.3	124.016	64	187.3	188.016	179.763	189.14				0.7155
1949	1		168.6	107.061	64	177.7	171.061	177.142	186.806				-6.639
1949	2		258	163.83	64	214.8	227.83	176.254	184.915				13.03
1949	3		223	141.605	64	201.8	205.605	176.717	183.711				3.805
1949	4		208.1	132.143	64	183.8	196.143	177.883	183.613				12.3435
1949	5		150.4	95.504	64	158.3	159.504	179.296	185.227				1.204
1949	6		172.4	109.474	64	162.5	173.474	178.775	186.256				10.974
1949	7		178.3	113.221	64	165.1	177.221	176.317	184.843				12.1205
1949	8		175.3	111.316	64	179.5	175.316	171.867	180.917				-4.1845
1949	9		205.8	130.683	64	174.4	194.683	166.017	175.855				20.283
1949	10		186.3	118.301	64	177.2	182.3	162.529	172.81				5.1005
1949	11		203.2	129.032	64	176.5	193.032	161.858	171.556				16.532
1949	12		166.6	105.791	64	160.1	169.791	160.713	170.127				9.691
1950	1	1950	143.9	91.3765	64	145.9	155.377	158.367	167.389				9.4765
1950	2		134.3	85.2805	64	139.8	149.281	154.942	164.634				9.4805
1950	3		155.4	98.679	64	136.4	162.679	149.512	159.665				26.279
1950	4		160.6	101.981	64	165.5	165.981	143.154	153.516				0.481
1950	5		150.5	95.5675	64	160.5	159.567	136.708	147.569				-0.9325
1950	6		118.3	75.1205	64	132.8	139.12	130.921	141.87				6.3205
1950	7		128.9	81.8515	64	138.5	145.851	126.608	137.933				7.3515
1950	8		120.6	76.581	64	123.9	140.581	123.2	135.064				16.681
1950	9		72.7	46.1645	64	99.7	110.165	120.062	131.741				10.4645
1950	10		87	55.245	64	99.3	119.245	117.046	128.963				19.945
1950	11		77.7	49.3395	64	99.7	113.34	115.983	128.283				13.6395
1950	12		76.7	48.7045	64	98	112.704	117.904	129.005				14.7045
1951	1		85	53.975	64	104.5	117.975	118.562	128.54				13.475
1951	2		84.8	53.848	64	99.4	117.848	117.325	126.534				18.448
1951	3		79.3	50.3555	64	101.5	114.356	117.658	126.823				12.8555
1951	4		131.7	83.6295	64	128	147.63	118.717	127.651				19.6295
1951	5		153.7	97.5995	64	172.5	161.599	119.067	127.196				-10.9005
1951	6		142.4	90.424	64	166.9	154.424	119.217	126.794				-12.476
1951	7		87.2	55.372	64	120.2	119.372	118.762	125.767				-0.828
1951	8		86.5	54.9275	64	112.5	118.928	117.625	123.664				6.4275
1951	9		117.7	74.7395	64	119.1	138.74	116.004	121.012				19.6395
1951	10		73.3	46.5455	64	105.3	110.546	113.208	117.366				5.2455
1951	11		74.2	47.117	64	102.1	111.117	107.658	111.808				9.017
1951	12		65	41.275	64	99.2	105.275	100.608	106.238				6.075
1952	1		57.9	36.7665	64	92.4	100.767	96.1125	103.023				8.3665
1952	2		32.4	20.574	64	84.2	84.574	94.2208	101.97				0.374
1952	3		31.5	20.0025	64	77.8	84.0025	91.9833	99.6949				6.2025
1952	4		41.7	26.4795	64	84.6	90.4795	89.4958	96.6152				5.8795
1952	5		33.6	21.336	64	82.7	85.336	87.6875	94.4588				2.636
1952	6		52	33.02	64	87.5	97.02	86.1583	92.911				9.52
1952	7		56.1	35.6235	64	91.7	99.6235	84.9875	91.9559				7.9235
1952	8		77.8	49.403	64	95.6	113.403	83.9458	90.7256				17.803
1952	9		40.4	25.654	64	82.3	89.654	83.0625	89.5799				7.354
1952	10		34.2	21.717	64	82.4	85.717	82.6	89.0799				3.317
1952	11		31.8	20.193	64	81.6	84.193	82.1167	88.6195				2.593
1952	12		48.9	31.0515	64	83	95.0515	81.25	87.6723				12.0515
1953	1		37.9	24.0665	64	80.5	88.0665	79.925	85.9816				7.5665
1953	2		5.9	3.7465	64	71.1	67.7465	78.35	83.6638				-3.3535
1953	3		14.7	9.3345	64	69.7	73.3345	77.2917	82.1663				3.6345
1953	4		39.6	25.146	64	81.6	89.146	76.5375	81.2588				7.546
1953	5		18.3	11.6205	64	74.1	75.6205	75.5917	79.9041				1.5205
1953	6		31.5	20.0025	64	75.3	84.0025	74.5	77.9382				8.7025
1953	7		12.7	8.0645	64	72.1	72.0645	73.3167	75.7554				-0.0355
1953	8		33.6	21.336	64	77.4	85.336	72.5833	74.6283				7.936
1953	9		28	17.78	64	75.1	81.78	72.4917	74.5225				6.68
1953	10		12.3	7.8105	64	71.5	71.8105	72.0333	73.5753				0.3105
1953	11		2.5	1.5875	64	69.8	65.5875	71.325	72.1465				-4.2125
1953	12		3.9	2.4765	64	68.6	66.4765	70.8875	70.8712				-2.1235
1954	1		0.4	0.254	64	66.5	64.254	70.5542	69.9055				-2.246
1954	2		0.8	0.508	64	67.5	64.508	70.225	69.207				-2.992
1954	3		15.8	10.033	64	71.1	74.033	69.8083	67.9714				2.933
1954	4		2.7	1.7145	64	69.2	65.7145	69.6833	67.2438				-3.4855
1954	5		1.2	0.762	64	69.5	64.762	69.7833	67.4846				-4.738
1954	6		0.4	0.254	64	69.4	64.254	70.0208	67.9688				-5.146
1954	7		7.3	4.6355	64	70	68.6355	70.8375	69.0377				-1.3645
1954	8		12.6	8.001	64	71.6	72.001	71.9875	70.6807				0.401
1954	9		2.3	1.4605	64	70.9	65.4605	72.6292	71.2258				-5.4395
1954	10		10.5	6.6675	64	72.7	70.6675	73.1125	71.3634				-2.0325
1954	11		13.4	8.509	64	71	72.509	74.1083	72.7868				1.509
1954	12		11.3	7.1755	64	73.1	71.1755	75.6708	75.0331				-1.9245
1955	1		33.4	21.209	64	81.6	85.209	77.4417	77.036				3.609
1955	2		29.9	18.9865	64	80	82.9865	79.175	79.0548				2.9865
1955	3		7.3	4.6355	64	74	68.6355	81.1167	81.8038				-5.3645
1955	4		16.4	10.414	64	77.9	74.414	83.7625	85.2699				-3.486
1955	5		41.3	26.2255	64	84.7	90.2255	87.7	90.1752				5.5255
1955	6		45.2	28.702	64	91.7	92.702	92.4292	95.7421				1.002
1955	7		38.2	24.257	64	90.2	88.257	97.1083	100.192				-1.943
1955	8		58	36.83	64	93	100.83	102.867	105.918				7.83
1955	9		60.8	38.608	64	96.1	102.608	109.875	114.017				6.508
1955	10		83	52.705	64	111	116.705	117.137	121.973	122	117.1		5.705		116.7	111		4.1
1955	11		126.3	80.2005	64	127.2	144.201	124.288	129.709	129.7	124.3		17.0005		144.2	127.2		4.4
1955	12		108.8	69.088	64	130.4	133.088	130.517	136.906	136.9	130.5		2.688		133.1	130.4		4.9
1956	1		104.1	66.1035	64	136.6	130.103	136.562	143.902	143.9	136.6		-6.4965		130.1	136.6		5.4
1956	2		175.6	111.506	64	163.2	175.506	144.208	152.545	152.5	144.2		12.306		175.5	163.2		5.8
1956	3		167.7	106.489	64	159	170.489	153.067	162.25	162.3	153.1		11.4895		170.5	159		6
1956	4		156.7	99.5045	64	167.2	163.505	161.246	170.757	170.8	161.2		-3.6955		163.5	167.2		5.9
1956	5		193.4	122.809	64	167	186.809	169.875	178.578	178.6	169.9		19.809		186.8	167		5.1
1956	6		165.1	104.838	64	158.9	168.839	179.592	187.095	187.1	179.6		9.9385		168.8	158.9		4.2
1956	7		182.7	116.014	64	168.1	180.014	188.033	194.842	194.8	188		11.9145		180	168.1		3.6
1956	8		240.2	152.527	64	198.6	216.527	192.458	198.506	198.5	192.5		17.927		216.5	198.6		3.1
1956	9		245.4	155.829	64	203.1	219.829	194.783	200.2	200.2	194.8		16.729		219.8	203.1		2.8
1956	10		219.9	139.637	64	200.3	203.637	197.742	204.073	204.1	197.7		3.3365		203.6	200.3		3.2
1956	11		285	180.975	64	245	244.975	201.092	207.536	207.5	201.1		-0.025		245	245		3.2
1956	12		272	172.72	64	245.8	236.72	207.237	211.738	211.7	207.2		-9.08		236.7	245.8		2.2
1957	1		233.7	148.399	64	223.8	212.399	213.837	217.072	217.1	213.8		-11.4005		212.4	223.8		1.5
1957	2		184.5	117.157	64	182.2	181.157	216.579	218.816	218.8	216.6		-1.0425		181.2	182.2		1
1957	3		222.8	141.478	64	195.8	205.478	219.725	220.723	220.7	219.7		9.678		205.5	195.8		0.5
1957	4		248	157.48	64	201.4	221.48	225.879	226.758	226.8	225.9		20.08		221.5	201.4		0.4
1957	5		233	147.955	64	213.2	211.955	229.604	230.809	230.8	229.6		-1.245		212	213.2		0.5
1957	6		284.3	180.531	64	260.2	244.531	231.279	232.942	232.9	231.3		-15.6695		244.5	260.2		0.7
1957	7		265.1	168.339	64	225.2	232.339	233.417	236.117	236.1	233.4		7.1385		232.3	225.2		1.2
1957	8		223.7	142.049	64	207.3	206.049	235.267	238.818	238.8	235.3		-1.2505		206	207.3		1.5
1957	9		334	212.09	64	269.9	276.09	238.525	241.366	241.4	238.5		6.19		276.1	269.9		1.2
1957	10		359.4	228.219	64	281.2	292.219	242.671	243.398	243.4	242.7		11.019		292.2	281.2	% DIFF=	0.3
1957	11		298.6	189.611	64	253.5	253.611	245.021	244.583	244.6	245		0.111		253.6	253.5	3.9	-0.2
1957	12		339	215.265	64	277.5	279.265	244.087	243.89	243.9	244.1		1.765		279.3	277.5		-0.1
1958	1		286.7	182.054	64	243.4	246.054	242.983	242.951	243	243		2.6545		246.1	243.4		0
1958	2		233.6	148.336	64	207	212.336	244.725	244.689	244.7	244.7		5.336		212.3	207		0
1958	3		270	171.45	64	249.2	235.45	245.221	244.978	245	245.2		-13.75		235.5	249.2		-0.1
1958	4		277.6	176.276	64	247.5	240.276	241.95	240.972	241	242		-7.224		240.3	247.5		-0.4
1958	5		248.2	157.607	64	223.5	221.607	237.629	236.064	236.1	237.6		-1.893		221.6	223.5		-0.7
1958	6		242.9	154.242	64	227.5	218.242	233.646	231.928	231.9	233.6		-9.2585		218.2	227.5		-0.7
1958	7		271	172.085	64	231.4	236.085	232.629	230.545	230.5	232.6		4.685		236.1	231.4		-0.9
1958	8		283.5	180.023	64	242.9	244.023	233.383	230.28	230.3	233.4		1.1225		244	242.9		-1.3
1958	9		285.1	181.039	64	246.2	245.039	232.283	229.275	229.3	232.3		-1.1615		245	246.2		-1.3
1958	10		256.9	163.131	64	226.4	227.131	229.879	227.864	227.9	229.9		0.7315		227.1	226.4		-0.9
1958	11		215.6	136.906	64	204.6	200.906	228.15	226.518	226.5	228.2		-3.694		200.9	204.6		-0.7
1958	12		265.7	168.719	64	230.8	232.719	227.771	226.29	226.3	227.8		1.9195		232.7	230.8		-0.7
1959	1		307.7	195.389	64	265.7	259.389	226.737	224.621	224.6	226.7		-6.3105		259.4	265.7		-0.9
1959	2		202.6	128.651	64	202.8	192.651	225.712	223.033	223	225.7		-10.149		192.7	202.8		-1.2
1959	3		263	167.005	64	227	231.005	223.521	220.906	220.9	223.5		4.005		231	227		-1.2
1959	4		231.3	146.876	64	212	210.876	218.858	216.178	216.2	218.9		-1.1245		210.9	212		-1.2
1959	5		243.6	154.686	64	217.5	218.686	215.271	212.495	212.5	215.3		1.186		218.7	217.5		-1.3
1959	6		238.9	151.702	64	224.4	215.702	212.017	209.092	209.1	212		-8.6985		215.7	224.4		-1.4
1959	7		211.9	134.556	64	209.7	198.556	206.858	204.089	204.1	206.9		-11.1435		198.6	209.7		-1.3
1959	8		282.6	179.451	64	240	243.451	202.45	200.036	200	202.5		3.451		243.5	240		-1.2
1959	9		205.6	130.556	64	196.5	194.556	197.537	195.508	195.5	197.5		-1.944		194.6	196.5		-1
1959	10		157.7	100.139	64	164.2	164.139	192.329	190.825	190.8	192.3		-0.0605		164.1	164.2		-0.8
1959	11		175.6	111.506	64	180.7	175.506	188.392	187.309	187.3	188.4		-5.194		175.5	180.7		-0.6
1959	12		177.1	112.459	64	176.6	176.459	183.867	183.15	183.1	183.9		-0.1415		176.5	176.6		-0.4
1960	1	1960	207.2	131.572	64	196.1	195.572	179.792	179.911	179.9	179.8		-0.528		195.6	196.1		0.1
1960	2		149.9	95.1865	64	166.6	159.187	175.558	176.416	176.4	175.6		-7.4135		159.2	166.6		0.5
1960	3		144.6	91.821	64	145.3	155.821	171.75	173.291	173.3	171.8		10.521		155.8	145.3		0.9
1960	4		172.7	109.664	64	168.7	173.664	169.542	171.548	171.5	169.5		4.9645		173.7	168.7		1.2
1960	5		169.3	107.506	64	166.3	171.506	167.133	169.19	169.2	167.1		5.2055		171.5	166.3		1.2
1960	6		156	99.06	64	167	163.06	163.892	166.423	166.4	163.9		-3.94		163.1	167		1.5
1960	7		172.4	109.474	64	169.3	173.474	158.858	161.634	161.6	158.9		4.174		173.5	169.3		1.7
1960	8		190	120.65	64	178.8	184.65	152.992	156.088	156.1	153		5.85		184.7	178.8		2
1960	9		180.1	114.364	64	166.3	178.363	148.646	152.016	152	148.6		12.0635		178.4	166.3		2.3
1960	10		117.3	74.4855	64	141.4	138.486	144.296	147.91	147.9	144.3		-2.9145		138.5	141.4		2.5
1960	11		126.9	80.5815	64	145.7	144.582	138.979	143.073	143.1	139		-1.1185		144.6	145.7		2.9
1960	12		121.2	76.962	64	133.8	140.962	134.05	139.277	139.3	134.1		7.162		141	133.8		3.9
1961	1		82.1	52.1335	64	118.1	116.133	129.775	136.112	136.1	129.8		-1.9665		116.1	118.1		4.9
1961	2		65.4	41.529	64	103.8	105.529	124.821	131.246	131.2	124.8		1.729		105.5	103.8		5.1
1961	3		75.2	47.752	64	103.8	111.752	119.729	125.934	125.9	119.7		7.952		111.8	103.8		5.2
1961	4		86.9	55.1815	64	105.8	119.181	115.662	121.87	121.9	115.7		13.3815		119.2	105.8		5.4
1961	5		72.3	45.9105	64	101.6	109.91	111.383	118.06	195.9	193.9		8.3105		196.7	194.7		1.4
1961	6		109.5	69.5325	64	113.4	133.532	107.246	114.231				20.1325
1961	7		99.3	63.0555	64	120.3	127.055	104.408	111.815	% DIFF=			6.7555		% DIFF=
1961	8		79.2	50.292	64	108.9	114.292	103.146	111.268	1			5.392		1
1961	9		90.1	57.2135	64	114	121.213	102.792	111.162	Standard	Standard		7.2135
1961	10		53.7	34.0995	64	96.1	98.0995	102.238	110.334	deviation	deviation		1.9995
1961	11		46.5	29.5275	64	88.3	93.5275	101.804	109.503	4.61773	4.90618		5.2275
1961	12		56.9	36.1315	64	91.9	100.132	100.929	107.908				8.2315
1962	1		55.1	34.9885	64	91.9	98.9885	98.575	104.791	0.95	0.95		7.0885
1962	2		71.7	45.5295	64	99.7	109.53	95.8	101.732	under	under		9.8295
1962	3		64.9	41.2115	64	99.4	105.212	93.5875	100.01	186.665	184.088		5.8115
1962	4		65.9	41.8465	64	96.9	105.847	92.2375	99.6129	upper	upper		8.9465
1962	5		61.9	39.3065	64	100.1	103.306	91.6458	99.4727	205.135	203.712		3.2065
1962	6		59.6	37.846	64	93.9	101.846	90.9042	98.6419				7.946
1962	7		31.4	19.939	64	83.3	83.939	89.7625	97.3163				0.639
1962	8		31.5	20.0025	64	79.3	84.0025	88.2292	95.6521				4.7025
1962	9		72.7	46.1645	64	90.5	110.165	86.3875	93.6254				19.6645
1962	10		56.1	35.6235	64	87.2	99.6235	84.7542	91.9241				12.4235
1962	11		38.8	24.638	64	83	88.638	83.6167	91.2627				5.638
1962	12		33.2	21.082	64	79.4	85.082	82.8625	91.0193				5.682
1963	1		28.7	18.2245	64	77	82.2245	82.3375	90.7256				5.2245
1963	2		35.2	22.352	64	77.8	86.352	82.2875	91.0775				8.552
1963	3		24.8	15.748	64	77.1	79.748	82.2542	91.0378				2.648
1963	4		41.7	26.4795	64	80	90.4795	81.9542	90.416				10.4795
1963	5		61.1	38.7985	64	89.7	102.799	81.7125	90.1223				13.0985
1963	6		51.2	32.512	64	86.2	96.512	81.4417	89.6805				10.312
1963	7		28.7	18.2245	64	78.4	82.2245	81.1333	89.2121				3.8245
1963	8		47.5	30.1625	64	83	94.1625	80.85	88.7888				11.1625
1963	9		55.2	35.052	64	86	99.052	80.65	88.5084				13.052
1963	10		50.1	31.8135	64	84.5	95.8135	80.2792	87.7278				11.3135
1963	11		33.7	21.3995	64	79.9	85.3995	79.2125	85.7276				5.4995
1963	12		21.6	13.716	64	76	77.716	77.8083	83.4919				1.716
1964	1		22.6	14.351	64	73	78.351	76.8	81.862				5.351
1964	2		25.3	16.0655	64	75	80.0655	75.9208	80.338				5.0655
1964	3		24.1	15.3035	64	75.1	79.3035	74.7958	78.1711				4.2035
1964	4		12.9	8.1915	64	73.1	72.1915	73.6833	75.8136				-0.9085
1964	5		14.3	9.0805	64	71	73.0805	72.875	74.1335				2.0805
1964	6		13.5	8.5725	64	71.2	72.5725	72.5667	73.5488				1.3725
1964	7		4.8	3.048	64	69.2	67.048	72.7125	73.6361				-2.152
1964	8		13.8	8.763	64	71.1	72.763	72.775	73.5911				1.663
1964	9		7	4.445	64	70.9	68.445	72.6375	73.2975				-2.455
1964	10		9.2	5.842	64	72.9	69.842	72.5458	73.0514				-3.058
1964	11		11.1	7.0485	64	72.1	71.0485	72.9	73.5144				-1.0515
1964	12		22.1	14.0335	64	76.4	78.0335	73.6167	74.3082				1.6335
1965	1		25.4	16.129	64	76.1	80.129	74.275	74.8982				4.029
1965	2		20.8	13.208	64	73.4	77.208	74.8208	75.2157				3.808
1965	3		17.5	11.1125	64	73.4	75.1125	75.3208	75.6655				1.7125
1965	4		10.2	6.477	64	72.6	70.477	75.875	76.655				-2.123
1965	5		34.5	21.9075	64	80	85.9075	76.3208	77.4911				5.9075
1965	6		23.3	14.7955	64	79.4	78.7955	76.4333	77.8695				-0.6045
1965	7		17.3	10.9855	64	76.8	74.9855	76.7583	78.3325				-1.8145
1965	8		13.3	8.4455	64	76.6	72.4455	77.4958	79.1104				-4.1545
1965	9		24.5	15.5575	64	77.4	79.5575	78.525	79.9941				2.1575
1965	10		29.1	18.4785	64	79.7	82.4785	80.2417	82.0499				2.7785
1965	11		22.8	14.478	64	76	78.478	82.1583	84.3914				2.478
1965	12		24.7	15.6845	64	75.2	79.6845	83.8583	86.352				4.4845
1966	1		40.3	25.5905	64	85.1	89.5905	86.0833	89.191				4.4905
1966	2		35.3	22.4155	64	82.1	86.4155	88.8333	92.4242				4.3155
1966	3		36.4	23.114	64	89.4	87.114	91.6333	95.2261				-2.286
1966	4		69	43.815	64	97.8	107.815	94.25	97.8376				10.015
1966	5		64.2	40.767	64	100.8	104.767	96.875	100.756				3.967
1966	6		67.7	42.9895	64	99.4	106.989	100.221	104.283				7.5895
1966	7		80.2	50.927	64	110.2	114.927	104.529	109.358				4.727
1966	8		72.6	46.101	64	109.2	110.101	109.496	115.02				0.901
1966	9		71.1	45.1485	64	112	109.148	114.95	120.819				-2.8515
1966	10		81.2	51.562	64	107.9	115.562	119.225	124.822	124.8	119.2		7.662		115.6	107.9		4.7
1966	11		81	51.435	64	110.8	115.435	122.496	127.143	127.1	122.5		4.635		115.4	110.8		3.8
1966	12		99.8	63.373	64	120.7	127.373	125.417	129.418	129.4	125.4		6.673		127.4	120.7		3.2
1967	1		157	99.695	64	143	163.695	127.887	131.456	131.5	127.9		20.695		163.7	143		2.8
1967	2		132.6	84.201	64	143.4	148.201	131.35	134.855	134.9	131.4		4.801		148.2	143.4		2.7
1967	3		158.3	100.521	64	159	164.521	134.262	137.946	137.9	134.3		5.5205		164.5	159		2.7
1967	4		98.4	62.484	64	130.8	126.484	136.292	140.099	140.1	136.3		-4.316		126.5	130.8		2.8
1967	5		122.5	77.7875	64	146.3	141.787	138.729	142.65	142.7	138.7		-4.5125		141.8	146.3		2.8
1967	6		95.4	60.579	64	124	124.579	141.583	146.137	146.1	141.6		0.579		124.6	124		3.2
1967	7		129.5	82.2325	64	144.9	146.233	144.804	148.643	148.6	144.8		1.3325		146.2	144.9		2.7
1967	8		151.8	96.393	64	157.6	160.393	147.537	149.738	149.7	147.5		2.793		160.4	157.6		1.5
1967	9		108.7	69.0245	64	133.5	133.024	147.858	149.688	149.7	147.9		-0.4755		133	133.5		1.2
1967	10		125	79.375	64	135.1	143.375	147.1	149.392	149.4	147.1		8.275		143.4	135.1		1.6
1967	11		133.6	84.836	64	142.1	148.836	147.588	151.352	151.4	147.6		6.736		148.8	142.1		2.6
1967	12		179	113.665	64	157.9	177.665	149.042	154.482	154.5	149		19.765		177.7	157.9		3.7
1968	1		172.5	109.538	64	183.1	173.538	149.858	156.268	156.3	149.9		-9.5625		173.5	183.1		4.3
1968	2		158.5	100.648	64	168.9	164.648	149.229	156.525	156.5	149.2		-4.2525		164.6	168.9		4.9
1968	3		130.5	82.8675	64	141.2	146.868	149.108	158.12	158.1	149.1		5.6675		146.9	141.2		6
1968	4		115	73.025	64	130.4	137.025	150.162	160.364	160.4	150.2		6.625		137	130.4		6.8
1968	5		180	114.3	64	158.4	178.3	150.567	160.777	160.8	150.6		19.9		178.3	158.4		6.8
1968	6		156.2	99.187	64	146.8	163.187	149.704	159.84	159.8	149.7		16.387		163.2	146.8		6.8
1968	7		136.2	86.487	64	141.7	150.487	147.646	158.565	158.6	147.6		8.787		150.5	141.7		7.4
1968	8		154.8	98.298	64	145.7	162.298	145.45	158.229	158.2	145.5		16.598		162.3	145.7		8.8
1968	9		166	105.41	64	142.5	169.41	145.95	160.181	160.2	146		26.91		169.4	142.5		9.8
1968	10		152.5	96.8375	64	151.4	160.838	148.262	162.772	162.8	148.3		9.4375		160.8	151.4		9.8
1968	11		121.7	77.2795	64	135.5	141.279	148.946	163.46	163.5	148.9		5.7795		141.3	135.5		9.7
1968	12		155.5	98.7425	64	143.8	162.743	149.396	163.031	163	149.4		18.9425		162.7	143.8		9.1
1969	1		147.8	93.853	64	147.8	157.853	150.225	162.893	162.9	150.2		10.053		157.9	147.8		8.4
1969	2		170.5	108.267	64	151.5	172.267	150.237	162.494	162.5	150.2		20.7675		172.3	151.5	% DIFF=	8.2
1969	3		192.3	122.111	64	170.6	186.111	150.117	161.099	161.1	150.1		15.5105		186.1	170.6	1.6	7.3
1969	4		151.1	95.9485	64	156.5	159.948	150.021	159.676	159.7	150		3.4485		159.9	156.5		6.4
1969	5		169.9	107.886	64	148.7	171.887	150.821	159.507	159.5	150.8		23.1865		171.9	148.7		5.8
1969	6		150.1	95.3135	64	167.3	159.314	151.362	159.343	159.3	151.4		-7.9865		159.3	167.3		5.3
1969	7		137.1	87.0585	64	141.1	151.058	151.392	159.163	159.2	151.4		9.9585		151.1	141.1		5.1
1969	8		138.8	88.138	64	146.6	152.138	152.438	159.702	159.7	152.4		5.538		152.1	146.6		4.8
1969	9		129.3	82.1055	64	138.7	146.106	152.683	158.742	158.7	152.7		7.4055		146.1	138.7		4
1969	10		135.4	85.979	64	152.9	149.979	152.383	157.615	157.6	152.4		-2.921		150	152.9		3.4
1969	11		132.4	84.074	64	153.2	148.074	153.637	158.001	158	153.6		-5.126		148.1	153.2		2.8
1969	12		138.6	88.011	64	139.1	152.011	154.308	158.313	158.3	154.3		12.911		152	139.1		2.6
1970	1	1970	157.9	100.267	64	153.2	164.267	154.662	158.932	158.9	154.7		11.0665		164.3	153.2		2.8
1970	2		180.8	114.808	64	171.2	178.808	155.117	159.332	159.3	155.1		7.608		178.8	171.2		2.7
1970	3		145.7	92.5195	64	156.8	156.519	155.162	159.448	159.4	155.2		-0.2805		156.5	156.8		2.8
1970	4		155.1	98.4885	64	163.1	162.488	155.183	159.414	159.4	155.2		-0.6115		162.5	163.1		2.7
1970	5		180.5	114.618	64	172.2	178.618	155.171	159.139	159.1	155.2		6.4175		178.6	172.2		2.6
1970	6		151.3	96.0755	64	159.9	160.076	155.762	158.663	158.7	155.8		0.1755		160.1	159.9		1.9
1970	7		159.3	101.156	64	157	165.156	156.308	157.364	157.4	156.3		8.1555		165.2	157		0.7
1970	8		131.7	83.6295	64	141.6	147.63	154.95	154.779	154.8	155		6.0295		147.6	141.6		-0.1
1970	9		140.8	89.408	64	144.8	153.408	151.5	151.371	151.4	151.5		8.608		153.4	144.8		-0.1
1970	10		122.6	77.851	64	147.3	141.851	147.683	148.373	148.4	147.7		-5.449		141.9	147.3		0.5
1970	11		134.8	85.598	64	158.5	149.598	143.292	144.338	144.3	143.3		-8.902		149.6	158.5		0.7
1970	12		118.2	75.057	64	148	139.057	138.508	139.586	139.6	138.5		-8.943		139.1	148		0.8
1971	1		129.2	82.042	64	157.4	146.042	134.725	136.274	136.3	134.7		-11.358		146	157.4		1.1
1971	2		111.8	70.993	64	134.4	134.993	132.204	133.911	133.9	132.2		0.593		135	134.4		1.3
1971	3		85.9	54.5465	64	110.8	118.547	129.521	130.889	130.9	129.5		7.7465		118.5	110.8		1.1
1971	4		101.6	64.516	64	117.5	128.516	126.163	127.749	127.7	126.2		11.016		128.5	117.5		1.3
1971	5		81.5	51.7525	64	112.4	115.752	122.5	125.248	125.2	122.5		3.3525		115.8	112.4		2.2
1971	6		70.7	44.8945	64	104.9	108.894	119.404	124.005	124	119.4		3.9945		108.9	104.9		3.9
1971	7		114.7	72.8345	64	121.2	136.834	116.338	122.843	122.8	116.3		15.6345		136.8	121.2		5.6
1971	8		87	55.245	64	116.9	119.245	114.575	122.084	122.1	114.6		2.345		119.2	116.9		6.6
1971	9		71.3	45.2755	64	105.1	109.275	115.421	123.171	123.2	115.4		4.1755		109.3	105.1		6.7
1971	10		73.4	46.609	64	106.4	110.609	115.942	123.584	123.6	115.9		4.209		110.6	106.4		6.6
1971	11		89.5	56.8325	64	111.5	120.833	116.621	124.124	124.1	116.6		9.3325		120.8	111.5		6.4
1971	12		116.5	73.9775	64	120.7	137.978	118.908	126.41	126.4	118.9		17.2775		138	120.7		6.3
1972	1		87	55.245	64	111.1	119.245	120.558	127.669	127.7	120.6		8.145		119.2	111.1		5.9
1972	2		125.3	79.5655	64	138.4	143.565	121.258	128.079	128.1	121.3		5.1655		143.6	138.4		5.6
1972	3		113.5	72.0725	64	127.1	136.072	122.167	129.172	129.2	122.2		8.9725		136.1	127.1		5.7
1972	4		89.6	56.896	64	113.7	120.896	123.15	130.043	130	123.2		7.196		120.9	113.7		5.6
1972	5		113.9	72.3265	64	132.5	136.327	123.221	129.598	129.6	123.2		3.8265		136.3	132.5		5.2
1972	6		124.7	79.1845	64	139.7	143.185	121.842	127.415	127.4	121.8		3.4845		143.2	139.7		4.6
1972	7		108.3	68.7705	64	126	132.77	120.463	125.367	125.4	120.5		6.7705		132.8	126		4.1
1972	8		108.9	69.1515	64	128.9	133.151	118.204	122.997	123	118.2		4.2515		133.2	128.9		4.1
1972	9		90.7	57.5945	64	114.9	121.595	115.296	120.02	120	115.3		6.6945		121.6	114.9		4.1
1972	10		86.9	55.1815	64	120.2	119.181	113.813	118.541	145.3	139.4		-1.0185		146.2	140.1		4.3
1972	11		59.2	37.592	64	99.4	101.592	112.092	116.917				2.192
1972	12		64.3	40.8305	64	99.7	104.831	108.804	113.683	% DIFF=			5.1305		% DIFF=
1973	1		61.8	39.243	64	99	103.243	105.292	109.881	4.3			4.243		4.4
1973	2		60.9	38.6715	64	96.3	102.672	101.842	105.981	Standard	Standard		6.3715
1973	3		65.4	41.529	64	99.4	105.529	99.6708	103.894	deviation	deviation		6.129
1973	4		81.8	51.943	64	105.8	115.943	97.9542	102.576	1.75628	1.66089		10.143
1973	5		60.3	38.2905	64	99.1	102.291	95.7542	100.774				3.1905
1973	6		56.1	35.6235	64	94.2	99.6235	94.175	99.2954	0.95	0.95		5.4235
1973	7		33.2	21.082	64	87.2	85.082	92.6417	97.8825	under	under		-2.118
1973	8		36.6	23.241	64	84.9	87.241	91.1417	96.6655	141.787	136.078		2.341
1973	9		84.1	53.4035	64	106.8	117.403	89.5417	95.1282	upper	upper		10.6035
1973	10		43.7	27.7495	64	87.1	91.7495	87.8708	93.5725	148.813	142.722		4.6495
1973	11		34.3	21.7805	64	79.7	85.7805	86.8042	92.8237				6.0805
1973	12		33.3	21.1455	64	81.5	85.1455	86.3167	92.5962				3.6455
1974	1		39.4	25.019	64	80.4	89.019	86.4458	93.6889				8.619
1974	2		37.3	23.6855	64	78.9	87.6855	86.8	95.2023				8.7855
1974	3		30.9	19.6215	64	78.4	83.6215	86.0542	94.7896				5.2215
1974	4		57.5	36.5125	64	86.7	100.513	85.7167	94.6996				13.8125
1974	5		56.3	35.7505	64	92.6	99.7505	86.4917	95.3637				7.1505
1974	6		51.5	32.7025	64	89	96.7025	86.7292	95.3081				7.7025
1974	7		79.1	50.2285	64	95.5	114.228	86.3833	94.8901				18.7285
1974	8		47.9	30.4165	64	85.1	94.4165	85.8875	94.0249				9.3165
1974	9		57.2	36.322	64	88.7	100.322	85.3375	93.1095				11.622
1974	10		67.2	42.672	64	97.1	106.672	84.4125	91.4214				9.572
1974	11		35.9	22.7965	64	88.3	86.7965	82.8917	88.9608				-1.5035
1974	12		29.6	18.796	64	78.6	82.796	81.3042	86.897				4.196
1975	1		27.3	17.3355	64	75	81.3355	79.9333	84.9524				6.3355
1975	2		16.7	10.6045	64	72.4	74.6045	79.5917	84.1612				2.2045
1975	3		16.9	10.7315	64	71.7	74.7315	79.5625	83.4178				3.0315
1975	4		7.7	4.8895	64	71.2	68.8895	78.3083	81.0233				-2.3105
1975	5		13.1	8.3185	64	71.6	72.3185	77.0167	79.3935				0.7185
1975	6		16.7	10.6045	64	71.9	74.6045	76.3708	78.7055				2.7045
1975	7		40.4	25.654	64	79.7	89.654	76	77.8218				9.954
1975	8		56.7	36.0045	64	92.7	100.005	75.7417	77.1419				7.3045
1975	9		20.3	12.8905	64	80.4	76.8905	75.7667	77.2556				-3.5095
1975	10		13.6	8.636	64	75.3	72.636	76.175	78.1605				-2.664
1975	11		27.9	17.7165	64	79.1	81.7165	76.4333	78.814				2.6165
1975	12		11.6	7.366	64	72.3	71.366	76.4958	78.9807				-0.934
1976	1		11.9	7.5565	64	72.4	71.5565	76.1208	78.0203				-0.8435
1976	2		6.4	4.064	64	68.8	68.064	75.0375	76.1655				-0.736
1976	3		31.5	20.0025	64	75.9	84.0025	74.0958	75.2951				8.1025
1976	4		27.3	17.3355	64	76.8	81.3355	73.8292	75.7131				4.5355
1976	5		18.2	11.557	64	72.2	75.557	73.5083	75.6099				3.357
1976	6		17.9	11.3665	64	72.8	75.3665	73.2667	75.3639				2.5665
1976	7		2.9	1.8415	64	69.8	65.8415	73.4542	75.9618				-3.9585
1976	8		24.1	15.3035	64	76.6	79.3035	74.0375	76.9884				2.7035
1976	9		20	12.7	64	73.9	76.7	74.5125	77.2106				2.8
1976	10		29.7	18.8595	64	75.4	82.8595	74.5667	76.5016				7.4595
1976	11		7.9	5.0165	64	71.3	69.0165	75.0083	76.5148				-2.2835
1976	12		22.3	14.1605	64	74.3	78.1605	76.2958	77.7266				3.8605
1977	1		23.8	15.113	64	74.9	79.113	77.7792	79.4384				4.213
1977	2		33.3	21.1455	64	80.3	85.1455	78.7667	80.6714				4.8455
1977	3		13	8.255	64	75.8	72.255	80.3	82.2933				-3.545
1977	4		19	12.065	64	78.2	76.065	82.2958	84.2724				-2.135
1977	5		27	17.145	64	81.4	81.145	84.0125	86.0213				-0.255
1977	6		54.9	34.8615	64	94.5	98.8615	85.8833	87.9474				4.3615
1977	7		30.6	19.431	64	83.7	83.431	88.2083	90.3022				-0.269
1977	8		43	27.305	64	86.4	91.305	92.0708	94.2498				4.905
1977	9		62.4	39.624	64	100.9	103.624	97.3208	99.4012				2.724
1977	10		62.1	39.4335	64	96.3	103.434	103.021	105.159				7.1335
1977	11		41.6	26.416	64	91.6	90.416	108.879	110.776				-1.184
1977	12		61.4	38.989	64	98.9	102.989	113.904	115.268				4.089
1978	1		73.7	46.7995	64	106.1	110.799	118.237	119.205	119.2	118.2		4.6995		110.8	106.1		0.8
1978	2		132.6	84.201	64	141.8	148.201	121.663	122.076	122.1	121.7		6.401		148.2	141.8		0.3
1978	3		108.4	68.834	64	140.3	132.834	125.379	126.645	126.6	125.4		-7.466		132.8	140.3		1
1978	4		141.2	89.662	64	150.5	153.662	130.358	133.215	133.2	130.4		3.162		153.7	150.5		2.2
1978	5		117.1	74.3585	64	149.7	138.358	135.25	138.822	138.8	135.3		-11.3415		138.4	149.7		2.6
1978	6		134.6	85.471	64	146.8	149.471	140.571	144.362	144.4	140.6		2.671		149.5	146.8		2.7
1978	7		99.7	63.3095	64	135.4	127.309	147.3	151.63	151.6	147.3		-8.0905		127.3	135.4		2.9
1978	8		82.4	52.324	64	116.9	116.324	153.454	157.565	157.6	153.5		-0.576		116.3	116.9		2.7
1978	9		195.7	124.269	64	159.6	188.269	157.662	161.507	161.5	157.7		28.6695		188.3	159.6		2.4
1978	10		177.1	112.459	64	157.1	176.459	160.504	163.872	163.9	160.5		19.3585		176.5	157.1		2.1
1978	11		138.5	87.9475	64	148.2	151.947	162.325	165.875	165.9	162.3		3.7475		151.9	148.2		2.2
1978	12		173.9	110.427	64	170	174.427	164.758	169.852	169.9	164.8		4.4265		174.4	170		3.1
1979	1		235.9	149.797	64	196.5	213.797	167.892	175.226	175.2	167.9		17.2965		213.8	196.5		4.4
1979	2		194.7	123.634	64	199.1	187.635	171.896	181.708	181.7	171.9		-11.4655		187.6	199.1		5.7
1979	3		195.3	124.016	64	184	188.016	176.179	186.74	186.7	176.2		4.0155		188	184		6
1979	4		143.7	91.2495	64	175	155.25	180.429	190.913	190.9	180.4		-19.7505		155.2	175		5.8
1979	5		190.3	120.841	64	168.9	184.841	186.175	196.403	196.4	186.2		15.9405		184.8	168.9		5.5
1979	6		211.7	134.429	64	186	198.429	190.583	201.607	201.6	190.6		12.4295		198.4	186		5.8
1979	7		225.7	143.32	64	171.4	207.32	191.846	203.351	203.4	191.8		35.9195		207.3	171.4		6
1979	8		201.4	127.889	64	177	191.889	191.808	203.745	203.7	191.8		14.889		191.9	177	% DIFF=	6.2
1979	9		266.9	169.481	64	202.3	233.481	190.912	203.959	204	190.9		31.1815		233.5	202.3	1.9	6.8
1979	10		263.6	167.386	64	216.4	231.386	191.612	205.862	205.9	191.6		14.986		231.4	216.4		7.4
1979	11		259.5	164.782	64	226.8	228.782	195.55	209.907	209.9	195.6		1.9825		228.8	226.8		7.3
1979	12		249.6	158.496	64	197.2	222.496	198.612	211.902	211.9	198.6		25.296		222.5	197.2		6.7
1980	1	1980	226.1	143.573	64	199.6	207.573	199.975	211.325	211.3	200		7.9735		207.6	199.6		5.7
1980	2		219.4	139.319	64	195.1	203.319	200.504	210.201	210.2	200.5		8.219		203.3	195.1		4.8
1980	3		178.7	113.474	64	166.5	177.474	199.542	208.693	208.7	199.5		10.9745		177.5	166.5		4.6
1980	4		232.2	147.447	64	209.3	211.447	198.296	206.64	206.6	198.3		2.147		211.4	209.3		4.2
1980	5		254.7	161.734	64	229.1	225.734	197.175	204.515	204.5	197.2		-3.3655		225.7	229.1		3.7
1980	6		222.7	141.415	64	199.3	205.415	197.517	203.121	203.1	197.5		6.1145		205.4	199.3		2.8
1980	7		192.9	122.492	64	190.8	186.492	197.142	201.21	201.2	197.1		-4.3085		186.5	190.8		2.1
1980	8		191.7	121.73	64	170.3	185.73	196.05	198.591	198.6	196.1		15.4295		185.7	170.3		1.3
1980	9		219.6	139.446	64	185.9	203.446	197.763	198.284	198.3	197.8		17.546		203.4	185.9		0.3
1980	10		233.3	148.145	64	202.9	212.145	199.933	198.575	198.6	199.9		9.2455		212.1	202.9		-0.7
1980	11		209.5	133.032	64	213.4	197.032	199.317	196.805	196.8	199.3		-16.3675		197	213.4		-1.3
1980	12		246.9	156.781	64	218.8	220.781	196.5	192.807	192.8	196.5		1.9815		220.8	218.8		-1.9
1981	1		156.6	99.441	64	169	163.441	195.25	190.725	190.7	195.3		-5.559		163.4	169		-2.3
1981	2		189.9	120.587	64	199.5	184.587	197.879	192.397	192.4	197.9		-14.9135		184.6	199.5		-2.8
1981	3		196.6	124.841	64	203.2	188.841	201.7	194.421	194.4	201.7		-14.359		188.8	203.2		-3.6
1981	4		225.3	143.066	64	224.7	207.066	204.029	194.649	194.6	204		-17.6345		207.1	224.7		-4.6
1981	5		194.7	123.634	64	198.9	187.635	204.438	193.574	193.6	204.4		-11.2655		187.6	198.9		-5.3
1981	6		131.6	83.566	64	161.9	147.566	203.292	191.59	191.6	203.3		-14.334		147.6	161.9		-5.8
1981	7		205.3	130.365	64	198.2	194.365	202.75	190.048	190	202.8		-3.8345		194.4	198.2		-6.3
1981	8		242.5	153.988	64	226	217.988	203.325	190.952	191	203.3		-8.0125		218	226		-6.1
1981	9		245.3	155.766	64	221.9	219.766	203.929	192.685	192.7	203.9		-2.1345		219.8	221.9		-5.5
1981	10		216.2	137.287	64	222.8	201.287	201.567	191.878	191.9	201.6		-21.513		201.3	222.8		-4.8
1981	11		186	118.11	64	203.3	182.11	196.867	188.428	188.4	196.9		-21.19		182.1	203.3		-4.3
1981	12		195.4	124.079	64	201.4	188.079	195.388	187.283	187.3	195.4		-13.321		188.1	201.4		-4.1
1982	1		149.8	95.123	64	173.4	159.123	194.642	186.388	186.4	194.6		-14.277		159.1	173.4		-4.2
1982	2		230.9	146.621	64	208.9	210.621	191.004	182.512	182.5	191		1.7215		210.6	208.9		-4.4
1982	3		221.1	140.398	64	208.3	204.398	186.475	178.319	178.3	186.5		-3.9015		204.4	208.3		-4.4
1982	4		170.3	108.141	64	162.9	172.141	181.612	174.09	174.1	181.6		9.2405		172.1	162.9		-4.1
1982	5		119.3	75.7555	64	147.9	139.755	177.383	170.376	170.4	177.4		-8.1445		139.8	147.9		-4
1982	6		163.7	103.95	64	177.4	167.95	175.392	168.129	168.1	175.4		-9.4505		167.9	177.4		-4.1
1982	7		139.4	88.519	64	164.8	152.519	173.562	166.523	166.5	173.6		-12.281		152.5	164.8		-4.1
1982	8		161.9	102.806	64	172.1	166.806	168.354	161.441	161.4	168.4		-5.2935		166.8	172.1		-4.1
1982	9		167.4	106.299	64	167.1	170.299	160.842	153.763	153.8	160.8		3.199		170.3	167.1		-4.4
1982	10		134.3	85.2805	64	160.9	149.281	155.258	148.653	148.7	155.3		-11.6195		149.3	160.9		-4.3
1982	11		127.5	80.9625	64	163.7	144.963	153.146	147.397	147.4	153.1		-18.7375		145	163.7		-3.8
1982	12		169	107.315	64	193.2	171.315	151.392	146.894	146.9	151.4		-21.885		171.3	193.2		-3
1983	1		115.5	73.3425	64	137.7	137.343	148.471	145.235	145.2	148.5		-0.3575		137.3	137.7		-2.2
1983	2		73.1	46.4185	64	119.6	110.418	145.125	142.684	142.7	145.1		-9.1815		110.4	119.6		-1.7
1983	3		88.7	56.3245	64	117.3	120.325	140.896	138.361	138.4	140.9		3.0245		120.3	117.3		-1.8
1983	4		109.6	69.596	64	119.9	133.596	136.479	134.146	134.1	136.5		13.696		133.6	119.9		-1.7
1983	5		132.5	84.1375	64	140.2	148.137	131.379	130.347	130.3	131.4		7.9375		148.1	140.2		-0.8
1983	6		131.5	83.5025	64	143	147.502	124.046	124.918	124.9	124		4.5025		147.5	143		0.7
1983	7		108.9	69.1515	64	129.1	133.151	118.712	120.576	120.6	118.7		4.0515		133.2	129.1		1.6
1983	8		96	60.96	64	127.5	124.96	118.392	120.481	120.5	118.4		-2.54		125	127.5		1.8
1983	9		69.9	44.3865	64	110.2	108.387	119.271	122.203	122.2	119.3		-1.8135		108.4	110.2		2.5
1983	10		72.5	46.0375	64	111.8	110.037	119.825	122.436	122.4	119.8		-1.7625		110	111.8		2.2
1983	11		45.7	29.0195	64	90.4	93.0195	119.854	120.986	121	119.9		2.6195		93	90.4		0.9
1983	12		45.6	28.956	64	90.5	92.956	117.829	118.287	118.3	117.8		2.456		93	90.5		0.4
1984	1		74.8	47.498	64	112.4	111.498	114.646	115.123	172	171.5		-0.902		172.2	171.8		0.3
1984	2		110.2	69.977	64	137.2	133.977	111.371	112.101				-3.223
1984	3		116.7	74.1045	64	120.8	138.105	108.329	109.236	% DIFF=			17.3045		% DIFF=
1984	4		90.4	57.404	64	129.7	121.404	105.413	106.399	0.2			-8.296		0.2
1984	5		96.9	61.5315	64	131.1	125.531	103.142	104.307	Standard	Standard		-5.5685
1984	6		65.1	41.3385	64	103.5	105.338	101.775	103.158	deviation	deviation		1.8385
1984	7		55.7	35.3695	64	92.2	99.3695	99.3875	101.01	3.52614	3.475		7.1695
1984	8		35	22.225	64	85.8	86.225	94.9875	97.1338				0.425
1984	9		22.6	14.351	64	78.9	78.351	90.2542	92.1252	0.95	0.95		-0.549
1984	10		12.6	8.001	64	73.1	72.001	85.9917	87.6326	under	under		-1.099
1984	11		26.5	16.8275	64	74.6	80.8275	81.6958	84.0739	164.948	164.55		6.2275
1984	12		21.4	13.589	64	73.5	77.589	78.6083	81.3937	upper	upper		4.089
1985	1		17.8	11.303	64	72.1	75.303	77.1125	80.002	179.052	178.45		3.203
1985	2		20.7	13.1445	64	71.9	77.1445	76.1375	78.9251				5.2445
1985	3		16.9	10.7315	64	72.5	74.7315	75.2542	77.7821				2.2315
1985	4		20.4	12.954	64	75.7	76.954	74.9375	77.5467				1.254
1985	5		32.4	20.574	64	82	84.574	74.9	77.5678				2.574
1985	6		28.3	17.9705	64	78.5	81.9705	74.7708	77.1921				3.4705
1985	7		39.9	25.3365	64	81.3	89.3365	74.675	76.6471				8.0365
1985	8		10.1	6.4135	64	73.3	70.4135	75	76.4407				-2.8865
1985	9		4.3	2.7305	64	70.2	66.7305	75.5292	76.5492				-3.4695
1985	10		22	13.97	64	74.2	77.97	75.6792	76.5201				3.77
1985	11		17.9	11.3665	64	72.6	75.3665	75.35	76.1417				2.7665
1985	12		15.8	10.033	64	72.4	74.033	74.6583	74.9776				1.633
1986	1		2.8	1.778	64	70.9	65.778	73.925	73.6679				-5.122
1986	2		27.9	17.7165	64	80.9	81.7165	73.425	73.0858				0.8165
1986	3		13.8	8.763	64	76.2	72.763	73.2583	73.1017				-3.437
1986	4		22.4	14.224	64	75.6	78.224	73.5667	73.6017				2.624
1986	5		16.1	10.2235	64	74.2	74.2235	74.0292	74.0145				0.0235
1986	6		0.6	0.381	64	69.7	64.381	74.0667	73.6838				-5.319
1986	7		18.1	11.4935	64	72.5	75.4935	73.9542	73.6044				2.9935
1986	8		9.9	6.2865	64	70.1	70.2865	73.4625	73.1414				0.1865
1986	9		5.1	3.2385	64	69.4	67.2385	72.8792	72.5884				-2.1615
1986	10		40.1	25.4635	64	82.4	89.4635	73.1708	73.308				7.0635
1986	11		15.4	9.779	64	75.5	73.779	74.2333	74.541				-1.721
1986	12		5.8	3.683	64	70.4	67.683	75.3292	75.6311				-2.717
1987	1		9.8	6.223	64	70.2	70.223	76.3792	76.6444				0.023
1987	2		3.4	2.159	64	69.8	66.159	77.9042	78.1817				-3.641
1987	3		17.4	11.049	64	73.3	75.049	79.5583	80.1687				1.749
1987	4		46	29.21	64	85.5	93.21	80.9167	81.7668				7.71
1987	5		39.1	24.8285	64	89.8	88.8285	82.5208	83.267				-0.9715
1987	6		18.8	11.938	64	80.4	75.938	84.3792	84.7671				-4.462
1987	7		38.2	24.257	64	87	88.257	86.6917	86.9896				1.257
1987	8		47.9	30.4165	64	92.2	94.4165	89.4833	89.7069				2.2165
1987	9		42.2	26.797	64	87	90.797	92.5292	92.7708				3.797
1987	10		63.4	40.259	64	97.4	104.259	95.8042	96.385				6.859
1987	11		48.8	30.988	64	99	94.988	98.5625	98.9753				-4.012
1987	12		29.1	18.4785	64	91.5	82.4785	102.375	102.695				-9.0215
1988	1		70.5	44.7675	64	104.6	108.767	107.958	107.953				4.1675
1988	2		45.4	28.829	64	102.4	92.829	113.642	112.839				-9.571
1988	3		91.2	57.912	64	113.8	121.912	119.179	117.919	117.9	119.2		8.112		121.9	113.8		-1.1
1988	4		108.8	69.088	64	123.6	133.088	124.946	123.042	123	124.9		9.488		133.1	123.6		-1.5
1988	5		74.2	47.117	64	117.9	111.117	130.158	128.363	128.4	130.2		-6.783		111.1	117.9		-1.4
1988	6		124.3	78.9305	64	143.8	142.93	136.65	136.567	136.6	136.7		-0.8695		142.9	143.8		-0.1
1988	7		131.4	83.439	64	157.6	147.439	146.033	145.608	145.6	146		-10.161		147.4	157.6		-0.3
1988	8		139.4	88.519	64	158	152.519	155.942	153.622	153.6	155.9		-5.481		152.5	158		-1.5
1988	9		142.7	90.6145	64	154.1	154.614	164.433	160.038	160	164.4		0.5145		154.6	154.1		-2.7
1988	10		156.5	99.3775	64	168.7	163.377	170.954	163.655	163.7	171		-5.3225		163.4	168.7		-4.3
1988	11		156.8	99.568	64	152.8	163.568	176.946	168.383	168.4	176.9		10.768		163.6	152.8		-4.8
1988	12		231.2	146.812	64	193.5	210.812	184.442	175.829	175.8	184.4		17.312		210.8	193.5		-4.7
1989	1		210.1	133.413	64	227.8	197.413	190.008	181.367	181.4	190		-30.3865		197.4	227.8		-4.5
1989	2		208.7	132.524	64	217	196.524	193.954	185.116	185.1	194		-20.4755		196.5	217		-4.6
1989	3		170.4	108.204	64	203	172.204	199.737	189.746	189.7	199.7		-30.796		172.2	203		-5
1989	4		166.3	105.601	64	190.9	169.601	204.446	193.4	193.4	204.4		-21.2995		169.6	190.9		-5.4
1989	5		195.4	124.079	64	194.4	188.079	209.275	197.027	197	209.3		-6.321		188.1	194.4		-5.9
1989	6		284.5	180.657	64	247.2	244.657	213.025	198.657	198.7	213		-2.5425		244.7	247.2	% DIFF=	-6.7
1989	7		180.5	114.618	64	187.8	178.618	212.542	198.591	198.6	212.5		-9.1825		178.6	187.8	-1	-6.6
1989	8		232	147.32	64	222.5	211.32	209.738	198.072	198.1	209.7		-11.18		211.3	222.5		-5.6
1989	9		225.1	142.939	64	228.4	206.939	207.283	197.66	197.7	207.3		-21.4615		206.9	228.4		-4.6
1989	10		212.2	134.747	64	207.4	198.747	206.438	198.842	198.8	206.4		-8.653		198.7	207.4		-3.7
1989	11		238.2	151.257	64	230	215.257	206.242	198.927	198.9	206.2		-14.743		215.3	230		-3.5
1989	12		211.4	134.239	64	206.3	198.239	203.271	194.921	194.9	203.3		-8.061		198.2	206.3		-4.1
1990	1	1990	227.4	144.399	64	203.4	208.399	200.267	191.73	191.7	200.3		4.999		208.4	203.4		-4.3
1990	2		171.8	109.093	64	174.1	173.093	200.45	192.543	192.5	200.5		-1.007		173.1	174.1		-3.9
1990	3		191.7	121.73	64	187	185.73	198.638	191.593	191.6	198.6		-1.2705		185.7	187		-3.5
1990	4		189.7	120.459	64	186.6	184.459	195.487	189.772	189.8	195.5		-2.1405		184.5	186.6		-2.9
1990	5		175.2	111.252	64	194	175.252	192.312	187.862	187.9	192.3		-18.748		175.3	194		-2.3
1990	6		153.3	97.3455	64	176.3	161.346	189.917	185.912	185.9	189.9		-14.9545		161.3	176.3		-2.1
1990	7		191.1	121.349	64	186.6	185.349	190.371	184.684	184.7	190.4		-1.2515		185.3	186.6		-3
1990	8		252.1	160.083	64	228.1	224.083	193.779	185.647	185.6	193.8		-4.0165		224.1	228.1		-4.2
1990	9		169.1	107.379	64	179.3	171.379	198.1	187.6	187.6	198.1		-7.9215		171.4	179.3		-5.3
1990	10		199.4	126.619	64	180.9	190.619	200.354	187.949	187.9	200.4		9.719		190.6	180.9		-6.2
1990	11		178.8	113.538	64	180.3	177.538	200.938	187.939	187.9	200.9		-2.762		177.5	180.3		-6.5
1990	12		197.1	125.159	64	198.5	189.159	202.5	189.608	189.6	202.5		-9.3415		189.2	198.5		-6.4
1991	1		195.3	124.016	64	222.1	188.016	205.387	192.797	192.8	205.4		-34.0845		188	222.1		-6.1
1991	2		240.3	152.591	64	237.2	216.591	206.208	193.797	193.8	206.2		-20.6095		216.6	237.2		-6
1991	3		197	125.095	64	227.6	189.095	205.817	193.492	193.5	205.8		-38.505		189.1	227.6		-6
1991	4		197.6	125.476	64	200.1	189.476	206.746	193.426	193.4	206.7		-10.624		189.5	200.1		-6.4
1991	5		166.9	105.982	64	194.5	169.982	207.042	192.855	192.9	207		-24.5185		170	194.5		-6.9
1991	6		224.7	142.684	64	213.3	206.684	207.312	192.754	192.8	207.3		-6.6155		206.7	213.3		-7
1991	7		240.2	152.527	64	218.9	216.527	207.604	193.244	193.2	207.6		-2.373		216.5	218.9		-6.9
1991	8		240.8	152.908	64	215.5	216.908	206.679	193.069	193.1	206.7		1.408		216.9	215.5		-6.6
1991	9		168.9	107.252	64	182.5	171.252	203.817	191.598	191.6	203.8		-11.2485		171.3	182.5		-6
1991	10		197.1	125.159	64	200	189.159	199.717	188.915	188.9	199.7		-10.8415		189.2	200		-5.4
1991	11		159.5	101.282	64	168.3	165.282	195.271	185.528	185.5	195.3		-3.0175		165.3	168.3		-5
1991	12		212.6	135.001	64	217	199.001	188.637	180.268	180.3	188.6		-17.999		199	217		-4.4
1992	1		198.3	125.921	64	210.6	189.921	181.333	173.596	173.6	181.3		-20.6795		189.9	210.6		-4.3
1992	2		230.7	146.494	64	226.5	210.494	174.133	166.322	166.3	174.1		-16.0055		210.5	226.5		-4.5
1992	3		151	95.885	64	169.6	159.885	167.679	160.401	160.4	167.7		-9.715		159.9	169.6		-4.3
1992	4		142.2	90.297	64	159.7	154.297	162.108	156.734	156.7	162.1		-5.403		154.3	159.7		-3.3
1992	5		94.3	59.8805	64	128.2	123.88	158.129	154.257	154.3	158.1		-4.3195		123.9	128.2		-2.4
1992	6		98.5	62.5475	64	120.4	126.547	153.604	151.069	151.1	153.6		6.1475		126.5	120.4		-1.7
1992	7		114.2	72.517	64	136.5	136.517	146.283	145.579	145.6	146.3		0.017		136.5	136.5		-0.5
1992	8		91.9	58.3565	64	125.1	122.357	138.75	139.763	139.8	138.8		-2.7435		122.4	125.1		0.7
1992	9		94	59.69	64	118	123.69	133.667	135.755	135.8	133.7		5.69		123.7	118		1.6
1992	10		133.4	84.709	64	130.8	148.709	130.433	133.204	133.2	130.4		17.909		148.7	130.8		2.1
1992	11		129.6	82.296	64	142	146.296	128.088	131.53	131.5	128.1		4.296		146.3	142		2.7
1992	12		122	77.47	64	134.7	141.47	127.217	130.355	130.4	127.2		6.77		141.5	134.7		2.5
1993	1		81.4	51.689	64	117.2	115.689	125.471	128.696	128.7	125.5		-1.511		115.7	117.2		2.6
1993	2		127.8	81.153	64	139.1	145.153	122.829	127.024	127	122.8		6.053		145.2	139.1		3.4
1993	3		102.4	65.024	64	135	129.024	120.363	124.584	124.6	120.4		-5.976		129	135		3.5
1993	4		94.4	59.944	64	116.7	123.944	117.812	121.274	121.3	117.8		7.244		123.9	116.7		2.9
1993	5		78.8	50.038	64	114.9	114.038	114.508	117.472	171.6	178.3		-0.862		172.9	179.5		-3.3
1993	6		69.6	44.196	64	112.8	108.196	111.117	113.9				-4.604
1993	7		80.4	51.054	64	102.2	115.054	109.487	112.575	% DIFF=			12.854		% DIFF=
1993	8		62.5	39.6875	64	96	103.688	107.496	110.739	-3.8			7.6875		-3.7
1993	9		31.2	19.812	64	87.9	83.812	103.854	107.357	Standard	Standard		-4.088
1993	10		71.1	45.1485	64	99.7	109.148	100.417	104.132	deviation	deviation		9.4485
1993	11		48.2	30.607	64	93.8	94.607	97.4917	101.063	3.32443	3.97252		0.807
1993	12		68.4	43.434	64	101.5	107.434	94.7292	98.9753				5.934
1994	1		84.9	53.9115	64	111.3	117.912	92.5583	97.3957	0.95	0.95		6.6115
1994	2		54.9	34.8615	64	97.2	98.8615	91.0167	95.8611	under	under		1.6615
1994	3		47.5	30.1625	64	89.5	94.1625	89.9333	95.3611	164.951	170.355		4.6625
1994	4		27.4	17.399	64	79.7	81.399	89.075	95.5013	upper	upper		1.699
1994	5		29.8	18.923	64	81.7	82.923	87.9375	94.9007	178.249	186.245		1.223
1994	6		39.7	25.2095	64	79.7	89.2095	86.2125	93.4481				9.5095
1994	7		50.6	32.131	64	83.2	96.131	83.7958	91.1066				12.931
1994	8		34.3	21.7805	64	78	85.7805	81.9208	89.482				7.7805
1994	9		40.5	25.7175	64	79.9	89.7175	81.1292	89.2095				9.8175
1994	10		67.1	42.6085	64	87.1	106.608	80.8458	89.0243				19.5085
1994	11		29.5	18.7325	64	79.1	82.7325	80.5917	88.5957				3.6325
1994	12		32.2	20.447	64	74.8	84.447	80.3333	87.8654				9.647
1995	1		32.6	20.701	64	80	84.701	79.9792	86.6113				4.701
1995	2		45.8	29.083	64	83.5	93.083	79.5958	85.3863				9.583
1995	3		46.3	29.4005	64	84.2	93.4005	79.2042	84.3041				9.2005
1995	4		21.6	13.716	64	78.2	77.716	78.5083	82.6822				-0.484
1995	5		19.4	12.319	64	77.1	76.319	77.8375	81.3064				-0.781
1995	6		22.5	14.2875	64	78.1	78.2875	77.3792	80.4386				0.1875
1995	7		20.4	12.954	64	76.3	76.954	76.8625	79.4702				0.654
1995	8		18.2	11.557	64	75.7	75.557	75.9625	77.9515				-0.143
1995	9		15.7	9.9695	64	72.8	73.9695	74.8	76.0518				1.1695
1995	10		30.6	19.431	64	77.5	83.431	73.8625	74.7685				5.931
1995	11		14	8.89	64	72.6	72.89	73.2917	74.0648				0.29
1995	12		14.9	9.4615	64	70.3	73.4615	72.8042	73.5938				3.1615
1996	1		13.3	8.4455	64	72.1	72.4455	72.425	73.2075				0.3455
1996	2		7.7	4.8895	64	69.8	68.8895	72.2458	73.0196				-0.9105
1996	3		12.6	8.001	64	70	72.001	72.0708	72.7233				2.001
1996	4		6.8	4.318	64	69.9	68.318	71.5917	71.5962				-1.582
1996	5		7.6	4.826	64	71.7	68.826	71.4042	71.0935				-2.874
1996	6		16.5	10.4775	64	71.8	74.4775	71.7917	71.3581				2.6775
1996	7		11.8	7.493	64	73.5	71.493	71.9792	71.1781				-2.007
1996	8		19.7	12.5095	64	74.2	76.5095	72.05	71.1094				2.3095
1996	9		3	1.905	64	70.1	65.905	72.2583	71.1834				-4.195
1996	10		0.7	0.4445	64	68.7	64.4445	72.5458	71.5988				-4.2555
1996	11		24.9	15.8115	64	76.9	79.8115	72.9083	72.4984				2.9115
1996	12		14	8.89	64	75.3	72.89	73.1917	73.0831				-2.41
1997	1		7.4	4.699	64	71.6	68.699	73.2792	73.226				-2.901
1997	2		11	6.985	64	72	70.985	73.5583	73.6785				-1.015
1997	3		12.1	7.6835	64	72.8	71.6835	74.9708	75.602				-1.1165
1997	4		23	14.605	64	74	78.605	76.75	77.9515				4.605
1997	5		25.4	16.129	64	76.3	80.129	78.2542	79.4755				3.829
1997	6		20.8	13.208	64	74	77.208	79.9583	81.2482				3.208
1997	7		12.9	8.1915	64	73.4	72.1915	81.5917	83.3278				-1.2085
1997	8		35.7	22.6695	64	81	86.6695	83.1708	85.3466				5.6695
1997	9		59.7	37.9095	64	97.2	101.91	85.4333	88.2332				4.7095
1997	10		32.8	20.828	64	84.3	84.828	88.3583	91.342				0.528
1997	11		50.4	32.004	64	97.4	96.004	91.1792	93.8873				-1.396
1997	12		55.5	35.2425	64	95.7	99.2425	94.1167	97.0174				3.5425
1998	1		44.5	28.2575	64	90.4	92.2575	97.5375	101.079				1.8575
1998	2		50.2	31.877	64	91.1	95.877	101.817	105.555				4.777
1998	3		82	52.07	64	108	116.07	106.025	109.728				8.07
1998	4		70.6	44.831	64	109	108.831	109.146	112.85				-0.169
1998	5		74	46.99	64	109	110.99	112.146	115.3				1.99
1998	6		90.5	57.4675	64	111.8	121.468	115.875	118.226	118.2	115.9		9.6675		121.5	111.8		2
1998	7		96.7	61.4045	64	117.7	125.405	119.937	121.01	121	119.9		7.7045		125.4	117.7		0.9
1998	8		121.1	76.8985	64	139.4	140.899	123.904	123.373	123.4	123.9		1.4985		140.9	139.4		-0.4
1998	9		132	83.82	64	139.8	147.82	126.587	125.206	125.2	126.6		8.02		147.8	139.8		-1.1
1998	10		78.5	49.8475	64	116.6	113.847	127.667	126.383	126.4	127.7		-2.7525		113.8	116.6		-1
1998	11		97.3	61.7855	64	137.1	125.785	129.829	128.992	129	129.8		-11.3145		125.8	137.1		-0.6
1998	12		119.2	75.692	64	145.5	139.692	134.258	134.08	134.1	134.3		-5.808		139.7	145.5		-0.1
1999	1		86	54.61	64	138.1	118.61	139.121	139.2	139.2	139.1		-19.49		118.6	138.1		0.1
1999	2		98	62.23	64	138.6	126.23	142.825	141.793	141.8	142.8		-12.37		126.2	138.6		-0.7
1999	3		103.5	65.7225	64	124.9	129.722	144.2	141.674	141.7	144.2		4.8225		129.7	124.9		-1.8
1999	4		93.6	59.436	64	118	123.436	146.054	143.38	143.4	146.1		5.436		123.4	118		-1.8
1999	5		149.6	94.996	64	151.9	158.996	150.113	148.175	148.2	150.1		7.096		159	151.9		-1.3
1999	6		207.2	131.572	64	175.2	195.572	153	150.519	150.5	153		20.372		195.6	175.2		-1.6
1999	7		173.5	110.172	64	171	174.173	154.417	151.701	151.7	154.4		3.1725		174.2	171		-1.8
1999	8		142.3	90.3605	64	175	154.361	156.312	154.739	154.7	156.3		-20.6395		154.4	175		-1
1999	9		106.3	67.5005	64	137.2	131.5	160.967	159.552	159.6	161		-5.6995		131.5	137.2		-0.9
1999	10		168.7	107.124	64	163.7	171.125	167.162	165.163	165.2	167.2		7.4245		171.1	163.7		-1.2
1999	11		188.3	119.571	64	187.4	183.571	171.508	168.185	168.2	171.5		-3.8295		183.6	187.4		-1.9
1999	12		116.8	74.168	64	164.5	138.168	173.471	168.108	168.1	173.5		-26.332		138.2	164.5		-3.1
2000	1	2000	133.1	84.5185	64	153.1	148.519	175.583	169.474	169.5	175.6		-4.5815		148.5	153.1		-3.5
2000	2		165.7	105.219	64	169.1	169.219	176.942	172.357	172.4	176.9		0.1195		169.2	169.1		-2.6
2000	3		217.7	138.239	64	206.1	202.239	178.558	174.683	174.7	178.6		-3.8605		202.2	206.1		-2.2
2000	4		191.5	121.603	64	185.5	185.603	180.621	175.281	175.3	180.6		0.1025		185.6	185.5		-3
2000	5		165.9	105.347	64	188.7	169.346	180.221	173.765	173.8	180.2		-19.3535		169.3	188.7		-3.6
2000	6		188	119.38	64	185.5	183.38	179.854	173.667	173.7	179.9		-2.12		183.4	185.5		-3.4
2000	7		244.3	155.131	64	211.4	219.131	180.35	174.62	174.6	180.4		7.7305		219.1	211.4	% DIFF=	-3.2
2000	8		180.5	114.618	64	167.2	178.618	179.608	173.702	173.7	179.6		11.4175		178.6	167.2	-7.2	-3.3
2000	9		156	99.06	64	183.8	163.06	177.275	171.159	171.2	177.3		-20.74		163.1	183.8		-3.5
2000	10		141.6	89.916	64	166.6	153.916	175.767	168.997	169	175.8		-12.684		153.9	166.6		-3.9
2000	11		158.1	100.394	64	174.9	164.394	173.979	167.579	167.6	174		-10.5065		164.4	174.9		-3.7
2000	12		143.3	90.9955	64	168.2	154.995	172.187	167.344	167.3	172.2		-13.2045		155	168.2		-2.8
2001	1		142.6	90.551	64	161.3	154.551	168.767	164.528	164.5	168.8		-6.749		154.6	161.3		-2.5
2001	2		121.5	77.1525	64	143.1	141.153	165.604	160.816	160.8	165.6		-1.9475		141.2	143.1		-2.9
2001	3		165.8	105.283	64	176.1	169.283	167.783	162.489	162.5	167.8		-6.817		169.3	176.1		-3.2
2001	4		161.7	102.679	64	179.3	166.679	171.633	166.052	166.1	171.6		-12.6205		166.7	179.3		-3.3
2001	5		142.1	90.2335	64	152	154.233	174.683	167.931	167.9	174.7		2.2335		154.2	152		-3.9
2001	6		202.9	128.841	64	179.2	192.841	178.567	170.275	170.3	178.6		13.6415		192.8	179.2		-4.6
2001	7		123	78.105	64	135.6	142.105	183.517	173.241	173.2	183.5		6.505		142.1	135.6		-5.6
2001	8		161.5	102.552	64	167.1	166.553	188.342	175.641	175.6	188.3		-0.5475		166.6	167.1		-6.7
2001	9		238.2	151.257	64	236.2	215.257	190.812	176.435	176.4	190.8		-20.943		215.3	236.2		-7.5
2001	10		194.1	123.254	64	206.6	187.254	191.4	176.607	176.6	191.4		-19.3465		187.3	206.6		-7.7
2001	11		176.6	112.141	64	208.1	176.141	193.158	178.475	178.5	193.2		-31.959		176.1	208.1		-7.6
2001	12		213.4	135.509	64	228.2	199.509	193.35	177.715	177.7	193.4		-28.691		199.5	228.2		-8.1
2002	1		184.6	117.221	64	220.1	181.221	194.092	176.76	176.8	194.1		-38.879		181.2	220.1		-8.9
2002	2		170.2	108.077	64	200.1	172.077	196.796	178.139	178.1	196.8		-28.023		172.1	200.1		-9.5
2002	3		147.1	93.4085	64	178.4	157.409	195.25	177.181	177.2	195.3		-20.9915		157.4	178.4		-9.3
2002	4		186.9	118.681	64	191.1	182.681	191.121	174.715	174.7	191.1		-8.4185		182.7	191.1		-8.6
2002	5		187.5	119.062	64	182.4	183.062	187.633	172.802	172.8	187.6		0.6625		183.1	182.4		-7.9
2002	6		128.8	81.788	64	153.4	145.788	182.679	169.958	170	182.7		-7.612		145.8	153.4		-7
2002	7		161	102.235	64	179.2	166.235	176.154	166.539	166.5	176.2		-12.965		166.2	179.2		-5.5
2002	8		175.6	111.506	64	188.4	175.506	169.513	162.687	162.7	169.5		-12.894		175.5	188.4		-4
2002	9		187.9	119.317	64	177.8	183.317	164.25	158.959	159	164.3		5.5165		183.3	177.8		-3.2
2002	10		151.2	96.012	64	165.9	160.012	159.604	155.376	155.4	159.6		-5.888		160	165.9		-2.6
2002	11		147.2	93.472	64	165.1	157.472	154.287	150.357	150.4	154.3		-7.628		157.5	165.1		-2.5
2002	12		135.3	85.9155	64	152.3	149.916	150.8	147.426	147.4	150.8		-2.3845		149.9	152.3		-2.2
2003	1		133.5	84.7725	64	139.4	148.773	147.996	146.293	146.3	148		9.3725		148.8	139.4		-1.2
2003	2		75.7	48.0695	64	121.4	112.07	143.392	143.835	143.8	143.4		-9.3305		112.1	121.4		0.3
2003	3		100.7	63.9445	64	130.8	127.945	138.075	139.348	139.3	138.1		-2.8555		127.9	130.8		0.9
2003	4		97.9	62.1665	64	127.2	126.167	134.733	135.041	135	134.7		-1.0335		126.2	127.2		0.2
2003	5		86.8	55.118	64	118.7	119.118	132.933	131.926	131.9	132.9		0.418		119.1	118.7		-0.8
2003	6		118.7	75.3745	64	133.4	139.375	130.088	128.556	128.6	130.1		5.9745		139.4	133.4		-1.2
2003	7		128.3	81.4705	64	131.9	145.471	127.175	124.957	125	127.2		13.5705		145.5	131.9		-1.7
2003	8		115.4	73.279	64	125.2	137.279	125.258	122.999	123	125.3		12.079		137.3	125.2		-1.8
2003	9		78.5	49.8475	64	113.4	113.847	123.725	122.285	122.3	123.7		0.4475		113.8	113.4		-1.2
2003	10		97.8	62.103	64	150.1	126.103	121.846	120.576	120.6	121.8		-23.997		126.1	150.1		-1
2003	11		82.9	52.6415	64	137.7	116.642	120.1	119.182	119.2	120.1		-21.0585		116.6	137.7		-0.8
2003	12		72.2	45.847	64	111.4	109.847	118.038	117.43	117.4	118		-1.553		109.8	111.4		-0.5
2004	1		60.6	38.481	64	110.4	102.481	116.271	114.871	114.9	116.3		-7.919		102.5	110.4		-1.2
2004	2		74.6	47.371	64	104.4	111.371	115.354	112.485	112.5	115.4		6.971		111.4	104.4		-2.5
2004	3		74.8	47.498	64	111	111.498	114.446	110.49	110.5	114.4		0.498		111.5	111		-3.5
2004	4		59.2	37.592	64	101.9	101.592	112.183	109.08	152.9	158.1		-0.308		153.4	158.7		-3
2004	5		72.8	46.228	64	102.1	110.228	109.204	108.117				8.128
2004	6		66.5	42.2275	64	100.5	106.227	107.296	106.632	% DIFF=			5.7275		% DIFF=
2004	7		83.8	53.213	64	122.4	117.213	106.017	105.156	-3.3			-5.187		-3.3
2004	8		69.7	44.2595	64	112.7	108.26	105.146	104.002	Standard	Standard		-4.4405
2004	9		48.8	30.988	64	104.1	94.988	103.833	102.248	deviation	deviation		-9.112
2004	10		74.2	47.117	64	105.1	111.117	102.279	100.774	2.54725	3.02839		6.017
2004	11		70.1	44.5135	64	111.2	108.513	101.625	99.9436				-2.6865
2004	12		28.9	18.3515	64	92.1	82.3515	101.446	99.3986	0.95	0.95		-9.7485
2005	1		48.1	30.5435	64	99	94.5435	100.333	98.5757	under	under		-4.4565
2005	2		43.5	27.6225	64	94.9	91.6225	98.5542	97.7661	147.806	152.043		-3.2775
2005	3		39.6	25.146	64	89	89.146	97.225	97.2158	upper	upper		0.146
2005	4		38.7	24.5745	64	86.6	88.5745	95.5167	95.2949	157.994	164.157		1.9745
2005	5		61.9	39.3065	64	101.7	103.306	93.1917	92.5538				1.6065
2005	6		56.8	36.068	64	96.6	100.068	91.9	92.231				3.468
2005	7		62.4	39.624	64	99.6	103.624	90.9667	92.3157				4.024
2005	8		60.5	38.4175	64	92.8	102.418	89.3667	90.5959				9.6175
2005	9		37.2	23.622	64	92.1	87.622	87.9292	89.0058				-4.478
2005	10		13.2	8.382	64	76.1	72.382	87.4583	88.7227				-3.718
2005	11		27.5	17.4625	64	84.4	81.4625	86.7917	88.3761				-2.9375
2005	12		59.3	37.6555	64	87.9	101.655	85.2667	86.8679				13.7555
2006	1		20.9	13.2715	64	80.8	77.2715	83.6458	84.9497				-3.5285
2006	2		5.7	3.6195	64	74.7	67.6195	82.2833	82.8357				-7.0805
2006	3		17.3	10.9855	64	74.7	74.9855	81.2458	81.4281				0.2855
2006	4		50.3	31.9405	64	89.6	95.9405	80.5875	81.1159				6.3405
2006	5		37.2	23.622	64	82.7	87.622	80.4917	81.3778				4.922
2006	6		24.5	15.5575	64	79	79.5575	80.2417	80.6158				0.5575
2006	7		22.2	14.097	64	78.3	78.097	79.9917	79.8591				-0.203
2006	8		20.8	13.208	64	81.4	77.208	80.0375	80.4174				-4.192
2006	9		23.7	15.0495	64	78.6	79.0495	79.95	80.4862				0.4495
2006	10		14.9	9.4615	64	73.8	73.4615	79.1208	79.031				-0.3385
2006	11		35.7	22.6695	64	84.4	86.6695	78.1458	77.3747				2.2695
2006	12		22.3	14.1605	64	81.9	78.1605	77.7417	76.8217				-3.7395
2007	1		29.3	18.6055	64	80.8	82.6055	77.4375	76.5492				1.8055
2007	2		18.4	11.684	64	75.8	75.684	76.8208	76.0703				-0.116
2007	3		7.2	4.572	64	71.5	68.572	75.9333	75.258				-2.928
2007	4		5.4	3.429	64	72.9	67.429	75.2042	74.3822				-5.471
2007	5		19.5	12.3825	64	76	76.3825	74.2458	73.1572				0.3825
2007	6		21.3	13.5255	64	76	77.5255	73.325	72.1545				1.5255
2007	7		15.1	9.5885	64	74	73.5885	72.7125	71.3554				-0.4115
2007	8		9.8	6.223	64	70.9	70.223	72.075	70.2786				-0.677
2007	9		4	2.54	64	67.8	66.54	71.8375	70.0881				-1.26
2007	10		1.5	0.9525	64	67.1	64.9525	71.775	70.26				-2.1475
2007	11		2.8	1.778	64	68.1	65.778	71.4292	69.8182				-2.322
2007	12		17.3	10.9855	64	76.1	74.9855	70.8417	68.998				-1.1145
2008	1		4.1	2.6035	64	71.9	66.6035	70.25	68.1884				-5.2965
2008	2		2.9	1.8415	64	69.4	65.8415	69.8708	67.5534				-3.5585
2008	3		15.5	9.8425	64	72.2	73.8425	69.75	67.2279				1.6425
2008	4		3.6	2.286	64	70.7	66.286	69.7792	67.2253				-4.414
2008	5		4.6	2.921	64	69.9	66.921	69.7667	67.3972				-2.979
2008	6		5.2	3.302	64	68	67.302	69.3458	67.0665				-0.698
2008	7		0.6	0.381	64	67.8	64.381	68.7875	66.5612				-3.419
2008	8		0.3	0.1905	64	68	64.1905	68.5625	66.4421				-3.8095
2008	9		1.2	0.762	64	67.8	64.762	68.3667	66.0029				-3.038
2008	10		4.2	2.667	64	67.8	66.667	68.2	65.5452				-1.133
2008	11		6.6	4.191	64	67.1	68.191	68.275	65.4367				1.091
2008	12		1	0.635	64	67	64.635	68.4833	65.4208				-2.365
2009	1		1.3	0.8255	64	67.6	64.8255	68.7083	65.5796				-2.7745
2009	2		1.2	0.762	64	68.3	64.762	68.8583	65.7013				-3.538
2009	3		0.6	0.381	64	68.6	64.381	69.0417	65.8494				-4.219
2009	4		1.2	0.762	64	70.3	64.762	69.35	66.0981				-5.538
2009	5		2.9	1.8415	64	72.1	65.8415	69.7208	66.1987				-6.2585
2009	6		6.3	4.0005	64	70.8	68.0005	70.2333	66.6114				-2.7995
2009	7		5.5	3.4925	64	70.4	67.4925	70.9958	67.4978				-2.9075
2009	8		0	0	64	69	64	72.05	68.7016				-5
2009	9		7.1	4.5085	64	71.2	68.5085	73.2292	70.0431				-2.6915
2009	10		7.7	4.8895	64	71.8	68.8895	74.0667	70.9056				-2.9105
2009	11		6.9	4.3815	64	72	68.3815	74.4625	71.4401				-3.6185
2009	12		16.3	10.3505	64	74.4	74.3505	74.7667	72.0619				-0.0495
2010	1	2010	19.5	12.3825	64	78.5	76.3825	75.4333	72.9138				-2.1175
2010	2		28.5	18.0975	64	82.7	82.0975	76.4542	74.2182				-0.6025
2010	3		24	15.24	64	82.5	79.24	77.4208	75.7766				-3.26
2010	4		10.4	6.604	64	76.5	70.604	78.2583	77.2371				-5.896
2010	5		13.9	8.8265	64	75.4	72.8265	79.0125	78.65				-2.5735
2010	6		18.8	11.938	64	74.8	75.938	79.675	79.5945				1.138
2010	7		25.2	16.002	64	82.4	80.002	80.0708	80.0179				-2.398
2010	8		29.6	18.796	64	81.5	82.796	80.5667	80.7481				1.296
2010	9		36.4	23.114	64	81.9	87.114	82.3042	82.7166				5.214
2010	10		33.6	21.336	64	81.2	85.336	85.175	85.8996				4.136
2010	11		34.4	21.844	64	80.7	85.844	87.6458	88.81				5.144
2010	12		24.5	15.5575	64	81.6	79.5575	89.5833	90.969				-2.0425
2011	1		27.3	17.3355	64	80.8	81.3355	91.2	92.9957				0.5355
2011	2		48.3	30.6705	64	92.3	94.6705	92.7667	94.9933				2.3705
2011	3		78.6	49.911	64	114.6	113.911	95.9667	98.1656				-0.689
2011	4		76.1	48.3235	64	113.3	112.323	100.513	102.817				-0.9765
2011	5		58.2	36.957	64	97.9	100.957	105.688	108.024				3.057
2011	6		56.1	35.6235	64	98.8	99.6235	110.867	113.038				0.8235
2011	7		64.5	40.9575	64	97.2	104.958	115.171	117.057	117.1	115.2		7.7575		105	97.2		1.6
2011	8		65.8	41.783	64	104.3	105.783	117.671	118.819	118.8	117.7		1.483		105.8	104.3		1
2011	9		120.1	76.2635	64	135.9	140.263	118.133	119.017	119	118.1		4.3635		140.3	135.9		0.7
2011	10		125.7	79.8195	64	136.3	143.82	118.125	119.488	119.5	118.1		7.5195		143.8	136.3		1.2
2011	11		139.1	88.3285	64	149.8	152.328	119.246	120.761	120.8	119.2		2.5285		152.3	149.8		1.3
2011	12		109.3	69.4055	64	136.8	133.406	121.421	122.724	122.7	121.4		-3.3945		133.4	136.8		1.1
2012	1		94.4	59.944	64	128.9	123.944	124.304	124.616	124.6	124.3		-4.956		123.9	128.9		0.3
2012	2		47.8	30.353	64	104.2	94.353	126.704	126.325	126.3	126.7		-9.847		94.4	104.2		-0.3
2012	3		86.6	54.991	64	113.8	118.991	126.817	126.394	126.4	126.8		5.191		119	113.8		-0.3
2012	4		85.9	54.5465	64	113.9	118.547	125.754	124.394	124.4	125.8		4.6465		118.5	113.9		-1.1
2012	5		96.5	61.2775	64	124.2	125.278	123.863	121.729	121.7	123.9		1.0775		125.3	124.2		-1.7
2012	6		92	58.42	64	124.7	122.42	121.225	118.978	119	121.2		-2.28		122.4	124.7		-1.9
2012	7		100.1	63.5635	64	140.5	127.564	119.654	117.634	117.6	119.7		-12.9365		127.6	140.5		-1.7
2012	8		94.8	60.198	64	118.6	124.198	119.304	118.025	118	119.3		5.598		124.2	118.6		-1.1
2012	9		93.7	59.4995	64	124.3	123.5	119.046	118.152	118.2	119		-0.8005		123.5	124.3		-0.8
2012	10		76.5	48.5775	64	122.4	112.578	119.396	118.499	118.5	119.4		-9.8225		112.6	122.4		-0.8
2012	11		87.6	55.626	64	118.3	119.626	120.317	119.692	119.7	120.3		1.326		119.6	118.3		-0.5
2012	12		56.8	36.068	64	105	100.068	120.271	119.914	119.9	120.3		-4.932		100.1	105		-0.3
2013	1		96.1	61.0235	64	123	125.023	118.921	119.142	119.1	118.9		2.0235		125	123		0.2
2013	2		60.9	38.6715	64	101.7	102.672	118.021	118.695	118.7	118		0.9715		102.7	101.7		0.6
2013	3		78.3	49.7205	64	110.1	113.721	117.146	117.578	117.6	117.1		3.6205		113.7	110.1		0.4
2013	4		107.3	68.1355	64	126	132.135	116.662	117.544	117.5	116.7		6.1355		132.1	126		0.8
2013	5		120.2	76.327	64	134.2	140.327	118.158	119.242	119.2	118.2		6.127		140.3	134.2		0.9
2013	6		76.7	48.7045	64	113.6	112.704	120.862	121.722	121.7	120.9		-0.8955		112.7	113.6		0.7
2013	7		86.2	54.737	64	119.2	118.737	123.783	124.058	124.1	123.8		-0.463		118.7	119.2		0.2
2013	8		91.8	58.293	64	118.3	122.293	127.8	126.865	126.9	127.8		3.993		122.3	118.3		-0.7
2013	9		54.5	34.6075	64	103.6	98.6075	132.075	130.453	130.5	132.1		-4.9925		98.6	103.6		-1.2
2013	10		114.4	72.644	64	131.5	136.644	134.467	131.924	131.9	134.5		5.144		136.6	131.5		-1.9
2013	11		113.9	72.3265	64	145.1	136.327	135.217	131.858	131.9	135.2		-8.7735		136.3	145.1		-2.5
2013	12		124.2	78.867	64	143.1	142.867	135.683	132.347	132.3	135.7		-0.233		142.9	143.1		-2.5
2014	1		117	74.295	64	155	138.295	137.142	133.411	133.4	137.1		-16.705		138.3	155		-2.7
2014	2		146.1	92.7735	64	166.1	156.774	138.5	134.181	134.2	138.5		-9.3265		156.8	166.1	% DIFF=	-3.1
2014	3		128.7	81.7245	64	148.3	145.724	140.821	136.578	136.6	140.8		-2.5755		145.7	148.3	-5.6	-3
2014	4		112.5	71.4375	64	145.2	135.438	143.662	137.93	137.9	143.7		-9.7625		135.4	145.2		-4
2014	5		112.5	71.4375	64	133	135.438	144.854	137.012	137	144.9		2.4375		135.4	133		-5.4
2014	6		102.9	65.3415	64	126	129.341	145.558	136.44	136.4	145.6		3.3415		129.3	126		-6.3
2014	7		100.2	63.627	64	141.8	127.627	145.258	135.506	135.5	145.3		-14.173		127.6	141.8		-6.7
2014	8		106.9	67.8815	64	128.3	131.882	142.825	132.77	132.8	142.8		3.5815		131.9	128.3		-7
2014	9		130	82.55	64	149.3	146.55	140.171	128.706	128.7	140.2		-2.75		146.6	149.3		-8.2
2014	10		90	57.15	64	154	121.15	138.563	125.759	125.8	138.6		-32.85		121.2	154		-9.2
2014	11		103.6	65.786	64	151.2	129.786	137.488	124.148	124.1	137.5		-21.414		129.8	151.2		-9.7
2014	12		112.9	71.6915	64	153.9	135.692	137.246	122.558	122.6	137.2		-18.2085		135.7	153.9		-10.7
2015	1		93	59.055	64	137	123.055	136.138	120.684	120.7	136.1		-13.945		123.1	137		-11.4
2015	2		66.7	42.3545	64	125.7	106.355	134.033	118.65	118.6	134		-19.3455		106.4	125.7		-11.5
2015	3		54.5	34.6075	64	125	98.6075	131.304	116.165	116.2	131.3		-26.3925		98.6	125		-11.5
2015	4		75.3	47.8155	64	129.9	111.816	127.263	114.107	114.1	127.3		-18.0845		111.8	129.9		-10.3
2015	5		88.8	56.388	64	122.5	120.388	123.312	112.313	112.3	123.3		-2.112		120.4	122.5		-8.9
2015	6		66.5	42.2275	64	130.7	106.227	119.608	109.765	109.8	119.6		-24.4725		106.2	130.7		-8.2
2015	7		65.8	41.783	64	110.5	105.783	116.204	107.36	107.4	116.2		-4.717		105.8	110.5		-7.6
2015	8		64.4	40.894	64	109.1	104.894	113.637	106.135	123.4	127.7		-4.206		124.1	128.6		-3.1
2015	9		78.6	49.911	64	103	113.911	111.171	105.852				10.911
2015	10		63.6	40.386	64	103.3	104.386	108.242	104.852	% DIFF=			1.086		% DIFF=
2015	11		62.2	39.497	64	107.1	103.497	105.612	102.875	-3.3			-3.603		-3.5
2015	12		58	36.83	64	109.1	100.83	102.55	100.671	Standard	Standard		-8.27
2016	1		57	36.195	64	100.1	100.195	99.7167	98.5705	deviation	deviation		0.095
2016	2		56.4	35.814	64	101	99.814	97.8875	97.311	1.06319	1.3593		-1.186
2016	3		54.1	34.3535	64	90.5	98.3535	96.3667	96.0357				7.8535
2016	4		37.9	24.0665	64	94.1	88.0665	95.025	94.3371	0.95	0.95		-6.0335
2016	5		51.5	32.7025	64	95.2	96.7025	93.0208	92.4586	under	under		1.5025
2016	6		20.5	13.0175	64	84.5	77.0175	90.2417	90.334	121.274	124.981		-7.4825
2016	7		32.4	20.574	64	88.7	84.574	87.6708	88.4713	upper	upper		-4.126
2016	8		50.2	31.877	64	87	95.877	85.5333	86.86	125.526	130.419		8.877
2016	9		44.6	28.321	64	88.6	92.321	83.7542	85.1032				3.721
2016	10		33.4	21.209	64	85.5	85.209	82.5375	83.9919				-0.291
2016	11		21.4	13.589	64	76.8	77.589	81.1833	82.9812				0.789
2016	12		18.5	11.7475	64	72.7	75.7475	80.0375	82.0843				3.0475
2017	1		26.1	16.5735	64	74.8	80.5735	79.3667	81.6636				5.7735
2017	2		26.4	16.764	64	75	80.764	78.7083	80.8116				5.764
2017	3		17.7	11.2395	64	73.8	75.2395	78.65	80.3221				1.4395
2017	4		32.3	20.5105	64	81.6	84.5105	78.4917	79.7639				2.9105
2017	5		18.9	12.0015	64	75.2	76.0015	77.8333	78.814				0.8015
2017	6		19.2	12.192	64	77	76.192	77.4333	78.1261				-0.808
2017	7		17.8	11.303	64	80.1	75.303						-4.797
2017	8		32.6	20.701	64	79.8	84.701						4.901
2017	9		43.7	27.7495	64	94.4	91.7495						-2.6505
2017	10		13.2	8.382	64	75.9	72.382						-3.518
2017	11		5.7	3.6195	64	70.6	67.6195						-2.9805
2017	12		8.2	5.207	64	69.3	69.207						-0.093
2018	1					67.7
2018	2					70.2
2018	3					67.5
2018	4					70.4
2018	5					72.53
2018	6					74.95
2018	7					71.88
2018	8					70.78
2018	9					68.9
2018	10					69.12
2018	11					67.4
2018	12
2019	1
2019	2
2019	3
2019	4
2019	5
2019	6
2019	7
2019	8
2019	9
2019	10
2019	11
2019	12

## Sheet: TABLE 3
				WDC	FITTED	FITTED	SMOOTHED	% DIFF	% DIFF				% DIFF	% DIFF	% DIFF	% DIFF	% DIFF	% DIFF/	% DIFF	% DIFF
			MEAN	STP	SUNSPOTS	SUNSPOTS	SUNSPOT	SMOOTHED	SMOOTHED				FITTED	FITTED	HIGHEST	SMOOTHED	SMOOTHED	MONTH	FITTED	FITTED
			SUNSPO			SMOOTHED	NUMBER	FITTED	FITTED				AND	AND	FITTED	FITTED	FITTED	SMOOTHED	SUNSPOTS	SUNSPOTS
			NUMBER		(ADJ-64)*1,575			SUNSPOTS	SUNSPOTS				MEAN	MEAN	AND	SUNSPOTS	SUNSPOTS	FITTED VS
1947	3		183.8	233.4	266.805		211.2						SUNSPOT	SUNSPOT	HIGHEST			SMOOTHED
1947	4		212.1	265.8	317.835		217.2	AND	AND				NUMBER	NUMBER	MEAN	AND	AND	SUNSPOT	AND	AND
1947	5		285	267.1	319.883		218.7	SMOOTHED	SMOOTHED						SUNSPOT	SMOOTHED	SMOOTHED	NUMBER	MEAN	MEAN
1947	6		232.1	233.8	267.435		216.1	SUNSPOT	SUNSPOT						NUMBER	SUNSPOT	SUNSPOT	TABLE 13	SUNSPOT	SUNSPOT
1947	7		223.5	222.3	249.323		214.1	NUMBER	NUMBER							NUMBER	NUMBER	SSN ABOVE	NUMBER	NUMBER
1947	8		267.4	237.1	272.632		210.9	TABLE 3	TABLE 3				TABLE 7	TABLE 7	TABLE 8	TABLE 14	TABLE 14	100	TABLE 15	TABLE 15
1947	9		239.9	201.9	217.192	220.493	206	SMOOTHED	SMOOTHED				SMOOTHED	SMOOTHED	SMOOTHED	SSN ABOVE	SSN ABOVE		SSN ABOVE	SSN ABOVE
1947	10		231.7	207.7	226.327	210.295	206.3	FLUX	FLUX				FLUX	FLUX	FLUX	100	100		100	100
1947	11		181.3	175.8	176.085	204.271	207.1	ABOVE	ABOVE				ABOVE	ABOVE	ABOVE
1947	12		164.9	171	168.525	199.828	205.7	115	115				115	115	115
1948	1		153.6	150.7	136.552	195.523	205						SEE TABLE	SEE TABLE	SEE TABLE
1948	2		122	131	105.525	189.387	202.3						3 AND 4!	3 AND 4!	3 AND 4!
1948	3		134.3	134.1	110.407	183.074	198.9
1948	4		268.5	209.7	229.477	177.43	195.7
1948	5		246.4	231.4	263.655	173.25	192.2
1948	6		237.5	201.8	217.035	173.401	191.6
1948	7		201.4	188.7	196.402	176.242	193.5
1948	8		223.7	177.2	178.29	183.514	199.8
1948	9		202.9	165.6	160.02	193.456	209.1
1948	10		192.9	158	148.05	196.199	210.3
1948	11		135.6	161.8	154.035	189.702	203.8
1948	12		195.3	187.3	194.198	182.326	197.1
1949	1		168.6	177.7	179.077	178.198	193.4
1949	2		258	214.8	237.51	176.8	190.4
1949	3		223	201.8	217.035	177.529	188.5
1949	4		208.1	183.8	188.685	179.366	188.4
1949	5		150.4	158.3	148.523	181.591	190.9
1949	6		172.4	162.5	155.137	180.771	192.5
1949	7		178.3	165.1	159.232	176.899	190.3
1949	8		175.3	179.5	181.912	169.89	184.1
1949	9		205.8	174.4	173.88	160.676	176.1
1949	10		186.3	177.2	178.29	155.183	171.4
1949	11		203.2	176.5	177.188	154.127	169.4
1949	12		166.6	160.1	151.357	152.322	167.1
1950	1	1950	143.9	145.9	128.993	148.627	162.8
1950	2		134.3	139.8	119.385	143.233	158.5
1950	3		155.4	136.4	114.03	134.682	150.7
1950	4		160.6	165.5	159.862	124.668	141
1950	5		150.5	160.5	151.987	114.516	131.6
1950	6		118.3	132.8	108.36	105.4	122.6
1950	7		128.9	138.5	117.337	98.6081	116.4
1950	8		120.6	123.9	94.3425	93.24	111.9
1950	9		72.7	99.7	56.2275	88.2984	106.7
1950	10		87	99.3	55.5975	83.5472	102.3
1950	11		77.7	99.7	56.2275	81.8737	101.2
1950	12		76.7	98	53.55	84.8991	102.4
1951	1		85	104.5	63.7875	85.9359	101.6
1951	2		84.8	99.4	55.755	83.9869	98.5
1951	3		79.3	101.5	59.0625	84.5119	98.9
1951	4		131.7	128	100.8	86.1788	100.2
1951	5		153.7	172.5	170.887	86.73	99.5
1951	6		142.4	166.9	162.067	86.9663	98.9
1951	7		87.2	120.2	88.515	86.2509	97.3
1951	8		86.5	112.5	76.3875	84.4594	94
1951	9		117.7	119.1	86.7825	81.9066	89.8
1951	10		73.3	105.3	65.0475	77.5031	84
1951	11		74.2	102.1	60.0075	68.7619	75.3
1951	12		65	99.2	55.44	57.6581	66.5
1952	1		57.9	92.4	44.73	50.5772	61.5
1952	2		32.4	84.2	31.815	47.5978	59.8
1952	3		31.5	77.8	21.735	44.0737	56.2
1952	4		41.7	84.6	32.445	40.1559	51.4
1952	5		33.6	82.7	29.4525	37.3078	48
1952	6		52	87.5	37.0125	34.8994	45.5
1952	7		56.1	91.7	43.6275	33.0553	44
1952	8		77.8	95.6	49.77	31.4147	42.1
1952	9		40.4	82.3	28.8225	30.0234	40.3
1952	10		34.2	82.4	28.98	29.295	39.5
1952	11		31.8	81.6	27.72	28.5338	38.8
1952	12		48.9	83	29.925	27.1687	37.3
1953	1		37.9	80.5	25.9875	25.0819	34.6
1953	2		5.9	71.1	11.1825	22.6012	31
1953	3		14.7	69.7	8.9775	20.9344	28.6
1953	4		39.6	81.6	27.72	19.7466	27.2
1953	5		18.3	74.1	15.9075	18.2569	25
1953	6		31.5	75.3	17.7975	16.5375	22
1953	7		12.7	72.1	12.7575	14.6737	18.5
1953	8		33.6	77.4	21.105	13.5187	16.7
1953	9		28	75.1	17.4825	13.3744	16.6
1953	10		12.3	71.5	11.8125	12.6525	15.1
1953	11		2.5	69.8	9.135	11.5369	12.8
1953	12		3.9	68.6	7.245	10.8478	10.8
1954	1		0.4	66.5	3.9375	10.3228	9.3
1954	2		0.8	67.5	5.5125	9.80437	8.2
1954	3		15.8	71.1	11.1825	9.14812	6.3
1954	4		2.7	69.2	8.19	8.95125	5.1
1954	5		1.2	69.5	8.6625	9.10875	5.5
1954	6		0.4	69.4	8.505	9.48281	6.3
1954	7		7.3	70	9.45	10.7691	7.9
1954	8		12.6	71.6	11.97	12.5803	10.5
1954	9		2.3	70.9	10.8675	13.5909	11.4
1954	10		10.5	72.7	13.7025	14.3522	11.6
1954	11		13.4	71	11.025	15.9206	13.8
1954	12		11.3	73.1	14.3325	18.3816	17.4
1955	1		33.4	81.6	27.72	21.1706	20.5
1955	2		29.9	80	25.2	23.9006	23.7
1955	3		7.3	74	15.75	26.9587	28
1955	4		16.4	77.9	21.8925	31.1259	33.5
1955	5		41.3	84.7	32.6025	37.3275	41.2
1955	6		45.2	91.7	43.6275	44.7759	50
1955	7		38.2	90.2	41.265	52.1456	57
1955	8		58	93	45.675	61.215	66
1955	9		60.8	96.1	50.5575	72.2531	78.8
1955	10		83	111	74.025	83.6916	91.3	83.6916	91.3				74.025	126.3
1955	11		126.3	127.2	99.54	94.9528	103.5	94.9528	103.5				99.54	108.8		94.9528	103.5	-8.25815	99.54	126.3
1955	12		108.8	130.4	104.58	104.764	114.8	104.764	114.8				104.58	104.1		104.764	114.8	-8.74238	104.58	108.8
1956	1		104.1	136.6	114.345	114.286	125.8	114.286	125.8				114.345	175.6		114.286	125.8	-9.15267	114.345	104.1
1956	2		175.6	163.2	156.24	126.328	139.4	126.328	139.4				156.24	167.7		126.328	139.4	-9.37724	156.24	175.6
1956	3		167.7	159	149.625	140.28	154.7	140.28	154.7				149.625	156.7		140.28	154.7	-9.32127	149.625	167.7
1956	4		156.7	167.2	162.54	153.162	168.1	153.162	168.1				162.54	193.4		153.162	168.1	-8.88627	162.54	156.7
1956	5		193.4	167	162.225	166.753	180.4	166.753	180.4				162.225	165.1		166.753	180.4	-7.56479	162.225	193.4
1956	6		165.1	158.9	149.468	182.057	193.9	182.057	193.9				149.468	182.7		182.057	193.9	-6.10785	149.468	165.1
1956	7		182.7	168.1	163.957	195.352	206.1	195.352	206.1				163.957	240.2		195.352	206.1	-5.2147	163.957	182.7
1956	8		240.2	198.6	211.995	202.322	211.8	202.322	211.8				211.995	245.4		202.322	211.8	-4.47504	211.995	240.2
1956	9		245.4	203.1	219.082	205.984	214.5	205.984	214.5				219.082	219.9		205.984	214.5	-3.97028	219.082	245.4
1956	10		219.9	200.3	214.673	210.643	220.6	210.643	220.6				214.673	285		210.643	220.6	-4.51354	214.673	219.9
1956	11		285	245	285.075	215.919	226	215.919	226				285.075	272		215.919	226	-4.46045	285.075	285
1956	12		272	245.8	286.335	225.599	232.7	225.599	232.7				286.335	233.7		225.599	232.7	-3.05154	286.335	272
1957	1		233.7	223.8	251.685	235.994	241.1	235.994	241.1				251.685	184.5		235.994	241.1	-2.11777	251.685	233.7
1957	2		184.5	182.2	186.165	240.312	243.8	240.312	243.8				186.165	222.8		240.312	243.8	-1.4306	186.165	184.5
1957	3		222.8	195.8	207.585	245.267	246.8	245.267	246.8				207.585	248		245.267	246.8	-0.621201	207.585	222.8
1957	4		248	201.4	216.405	254.96	256.3	254.96	256.3				216.405	233		254.96	256.3	-0.522947	216.405	248
1957	5		233	213.2	234.99	260.827	262.7	260.827	262.7				234.99	284.3		260.827	262.7	-0.713147	234.99	233
1957	6		284.3	260.2	309.015	263.465	266.1	263.465	266.1				309.015	265.1		263.465	266.1	-0.990347	309.015	284.3
1957	7		265.1	225.2	253.89	266.831	271.1	266.831	271.1				253.89	223.7		266.831	271.1	-1.5746	253.89	265.1
1957	8		223.7	207.3	225.698	269.745	275.3	269.745	275.3				225.698	334		269.745	275.3	-2.0178	225.698	223.7
1957	9		334	269.9	324.292	274.877	279.3	274.877	279.3				324.292	359.4	% DIFF=	274.877	279.3	-1.58365	324.292	334
1957	10		359.4	281.2	342.09	281.407	282.5	281.407	282.5				342.09	298.6	14.5646	281.407	282.5	-0.387058	342.09	359.4
1957	11		298.6	253.5	298.462	285.108	284.4	285.108	284.4				298.462	339		285.108	284.4	0.248879	298.462	298.6
1957	12		339	277.5	336.262	283.638	283.3	283.638	283.3				336.262	286.7		283.638	283.3	0.119242	336.262	339
1958	1		286.7	243.4	282.555	281.899	281.8	281.899	281.8				282.555	233.6		281.899	281.8	0.0350426	282.555	286.7
1958	2		233.6	207	225.225	284.642	284.5	284.642	284.5				225.225	270		284.642	284.5	0.0498682	225.225	233.6
1958	3		270	249.2	291.69	285.423	285	285.423	285				291.69	277.6		285.423	285	0.148355	291.69	270
1958	4		277.6	247.5	289.012	280.271	278.7	280.271	278.7				289.012	248.2		280.271	278.7	0.563778	289.012	277.6
1958	5		248.2	223.5	251.213	273.466	271	273.466	271				251.213	242.9		273.466	271	0.90994	251.213	248.2
1958	6		242.9	227.5	257.512	267.192	264.5	267.192	264.5				257.512	271		267.192	264.5	1.01784	257.512	242.9
1958	7		271	231.4	263.655	265.591	262.3	265.591	262.3				263.655	283.5		265.591	262.3	1.25465	263.655	271
1958	8		283.5	242.9	281.767	266.779	261.9	266.779	261.9				281.767	285.1		266.779	261.9	1.86283	281.767	283.5
1958	9		285.1	246.2	286.965	265.046	260.3	265.046	260.3				286.965	256.9		265.046	260.3	1.82338	286.965	285.1
1958	10		256.9	226.4	255.78	261.26	258.1	261.26	258.1				255.78	215.6		261.26	258.1	1.22421	255.78	256.9
1958	11		215.6	204.6	221.445	258.536	255.9	258.536	255.9				221.445	265.7		258.536	255.9	1.03019	221.445	215.6
1958	12		265.7	230.8	262.71	257.939	255.6	257.939	255.6				262.71	307.7		257.939	255.6	0.915126	262.71	265.7
1959	1		307.7	265.7	317.677	256.312	252.9	256.312	252.9				317.677	202.6		256.312	252.9	1.34898	317.677	307.7
1959	2		202.6	202.8	218.61	254.697	250.4	254.697	250.4				218.61	263		254.697	250.4	1.71613	218.61	202.6
1959	3		263	227	256.725	251.245	247.1	251.245	247.1				256.725	231.3		251.245	247.1	1.67758	256.725	263
1959	4		231.3	212	233.1	243.902	239.7	243.902	239.7				233.1	243.6		243.902	239.7	1.75297	233.1	231.3
1959	5		243.6	217.5	241.762	238.252	233.9	238.252	233.9				241.762	238.9		238.252	233.9	1.86044	241.762	243.6
1959	6		238.9	224.4	252.63	233.126	228.5	233.126	228.5				252.63	211.9		233.126	228.5	2.02462	252.63	238.9
1959	7		211.9	209.7	229.477	225.002	220.6	225.002	220.6				229.477	282.6		225.002	220.6	1.99541	229.477	211.9
1959	8		282.6	240	277.2	218.059	214.2	218.059	214.2				277.2	205.6		218.059	214.2	1.80147	277.2	282.6
1959	9		205.6	196.5	208.688	210.322	207.1	210.322	207.1				208.688	157.7		210.322	207.1	1.55556	208.688	205.6
1959	10		157.7	164.2	157.815	202.118	199.7	202.118	199.7				157.815	175.6		202.118	199.7	1.21104	157.815	157.7
1959	11		175.6	180.7	183.802	195.917	194.2	195.917	194.2				183.802	177.1		195.917	194.2	0.884076	183.802	175.6
1959	12		177.1	176.6	177.345	188.79	187.6	188.79	187.6				177.345	207.2		188.79	187.6	0.634328	177.345	177.1
1960	1	1960	207.2	196.1	208.057	182.372	182.5	182.372	182.5				208.057	149.9		182.372	182.5	-0.0702055	208.057	207.2
1960	2		149.9	166.6	161.595	175.704	177	175.704	177				161.595	144.6		175.704	177	-0.731992	161.595	149.9
1960	3		144.6	145.3	128.048	169.706	172.1	169.706	172.1				128.048	172.7		169.706	172.1	-1.39091	128.048	144.6
1960	4		172.7	168.7	164.902	166.228	169.4	166.228	169.4				164.902	169.3		166.228	169.4	-1.87242	164.902	172.7
1960	5		169.3	166.3	161.123	162.435	165.7	162.435	165.7				161.123	156		162.435	165.7	-1.97043	161.123	169.3
1960	6		156	167	162.225	157.329	161.3	157.329	161.3				162.225	172.4		157.329	161.3	-2.46164	162.225	156
1960	7		172.4	169.3	165.848	149.402	153.8	149.402	153.8				165.848	190		149.402	153.8	-2.85964	165.848	172.4
1960	8		190	178.8	180.81	140.162	145	140.162	145				180.81	180.1		140.162	145	-3.33664	180.81	190
1960	9		180.1	166.3	161.123	133.317	138.6	133.317	138.6				161.123	117.3		133.317	138.6	-3.81155	161.123	180.1
1960	10		117.3	141.4	121.905	126.466	132.1	126.466	132.1				121.905	126.9		126.466	132.1	-4.265	121.905	117.3
1960	11		126.9	145.7	128.677	118.092	124.5	118.092	124.5				128.677	121.2		118.092	124.5	-5.14684	128.677	126.9
1960	12		121.2	133.8	109.935	110.329	118.5	110.329	118.5				109.935	82.1		110.329	118.5	-6.89557	109.935	121.2
1961	1		82.1	118.1	85.2075	103.596	113.6	103.596	113.6				85.2075	65.4		103.596	113.6	-8.80667	85.2075	82.1
1961	2		65.4	103.8	62.685	95.7928	105.9	95.7928	105.9				62.685	75.2		95.7928	105.9	-9.54409	62.685	65.4
1961	3		75.2	103.8	62.685	87.7734	97.5	87.7734	97.5				62.685	86.9		210.274	213.133	-2.00864	212.386	214.977
1961	4		86.9	105.8	65.835	81.3684	91.1	81.3684	91.1				65.835	72.3
1961	5		72.3	101.6	59.22	74.6287	85.1	204.633	207.767				205.9	208.849					% DIFF=
1961	6		109.5	113.4	77.805	68.1122	79.1												-1.20491
1961	7		99.3	120.3	88.6725	63.6431	75.3	% DIFF=					% DIFF=			% DIFF=
1961	8		79.2	108.9	70.7175	61.6547	74.4	-1.50871					-1.41238			-1.34124
1961	9		90.1	114	78.75	61.0969	74.3
1961	10		53.7	96.1	50.5575	60.2241	73
1961	11		46.5	88.3	38.2725	59.5416	71.7
1961	12		56.9	91.9	43.9425	58.1634	69.1
1962	1		55.1	91.9	43.9425	54.4556	64.2
1962	2		71.7	99.7	56.2275	50.085	59.4
1962	3		64.9	99.4	55.755	46.6003	56.7
1962	4		65.9	96.9	51.8175	44.4741	56.1
1962	5		61.9	100.1	56.8575	43.5422	55.9
1962	6		59.6	93.9	47.0925	42.3741	54.6
1962	7		31.4	83.3	30.3975	40.5759	52.5
1962	8		31.5	79.3	24.0975	38.1609	49.8
1962	9		72.7	90.5	41.7375	35.2603	46.7
1962	10		56.1	87.2	36.54	32.6878	44
1962	11		38.8	83	29.925	30.8963	42.9
1962	12		33.2	79.4	24.255	29.7084	42.6
1963	1		28.7	77	20.475	28.8816	42.1
1963	2		35.2	77.8	21.735	28.8028	42.6
1963	3		24.8	77.1	20.6325	28.7503	42.6
1963	4		41.7	80	25.2	28.2778	41.6
1963	5		61.1	89.7	40.4775	27.8972	41.1
1963	6		51.2	86.2	34.965	27.4706	40.4
1963	7		28.7	78.4	22.68	26.985	39.7
1963	8		47.5	83	29.925	26.5388	39
1963	9		55.2	86	34.65	26.2237	38.6
1963	10		50.1	84.5	32.2875	25.6397	37.4
1963	11		33.7	79.9	25.0425	23.9597	34.2
1963	12		21.6	76	18.9	21.7481	30.7
1964	1		22.6	73	14.175	20.16	28.1
1964	2		25.3	75	17.325	18.7753	25.7
1964	3		24.1	75.1	17.4825	17.0034	22.3
1964	4		12.9	73.1	14.3325	15.2512	18.6
1964	5		14.3	71	11.025	13.9781	16
1964	6		13.5	71.2	11.34	13.4925	15
1964	7		4.8	69.2	8.19	13.7222	15.2
1964	8		13.8	71.1	11.1825	13.8206	15.1
1964	9		7	70.9	10.8675	13.6041	14.6
1964	10		9.2	72.9	14.0175	13.4597	14.3
1964	11		11.1	72.1	12.7575	14.0175	15
1964	12		22.1	76.4	19.53	15.1463	16.2
1965	1		25.4	76.1	19.0575	16.1831	17.2
1965	2		20.8	73.4	14.805	17.0428	17.7
1965	3		17.5	73.4	14.805	17.8303	18.4
1965	4		10.2	72.6	13.545	18.7031	19.9
1965	5		34.5	80	25.2	19.4053	21.2
1965	6		23.3	79.4	24.255	19.5825	21.8
1965	7		17.3	76.8	20.16	20.0944	22.6
1965	8		13.3	76.6	19.845	21.2559	23.8
1965	9		24.5	77.4	21.105	22.8769	25.2
1965	10		29.1	79.7	24.7275	25.5806	28.4
1965	11		22.8	76	18.9	28.5994	32.1
1965	12		24.7	75.2	17.64	31.2769	35.2
1966	1		40.3	85.1	33.2325	34.7812	39.7
1966	2		35.3	82.1	28.5075	39.1125	44.8
1966	3		36.4	89.4	40.005	43.5225	49.2
1966	4		69	97.8	53.235	47.6437	53.3
1966	5		64.2	100.8	57.96	51.7781	57.9
1966	6		67.7	99.4	55.755	57.0478	63.4
1966	7		80.2	110.2	72.765	63.8334	71.4
1966	8		72.6	109.2	71.19	71.6559	80.3
1966	9		71.1	112	75.6	80.2462	89.5
1966	10		81.2	107.9	69.1425	86.9794	95.8	86.9794	95.8				69.1425	81
1966	11		81	110.8	73.71	92.1309	99.4	92.1309	99.4				73.71	99.8
1966	12		99.8	120.7	89.3025	96.7313	103	96.7313	103				89.3025	157		96.7313	103	-6.08617	89.3025	99.8
1967	1		157	143	124.425	100.623	106.2	100.623	106.2				124.425	132.6		100.623	106.2	-5.25159	124.425	157
1967	2		132.6	143.4	125.055	106.076	111.6	106.076	111.6				125.055	158.3		106.076	111.6	-4.9496	125.055	132.6
1967	3		158.3	159	149.625	110.663	116.5	110.663	116.5				149.625	98.4		110.663	116.5	-5.00992	149.625	158.3
1967	4		98.4	130.8	105.21	113.859	119.8	113.859	119.8				105.21	122.5		113.859	119.8	-4.95879	105.21	98.4
1967	5		122.5	146.3	129.623	117.698	123.9	117.698	123.9				129.623	95.4		117.698	123.9	-5.0053	129.623	122.5
1967	6		95.4	124	94.5	122.194	129.4	122.194	129.4				94.5	129.5		122.194	129.4	-5.56897	94.5	95.4
1967	7		129.5	144.9	127.418	127.267	133.3	127.267	133.3				127.418	151.8		127.267	133.3	-4.52621	127.418	129.5
1967	8		151.8	157.6	147.42	131.572	135	131.572	135				147.42	108.7		131.572	135	-2.53958	147.42	151.8
1967	9		108.7	133.5	109.462	132.077	134.9	132.077	134.9				109.462	125		132.077	134.9	-2.09275	109.462	108.7
1967	10		125	135.1	111.982	130.882	134.5	130.882	134.5				111.982	133.6		130.882	134.5	-2.68959	111.982	125
1967	11		133.6	142.1	123.007	131.65	137.6	131.65	137.6				123.007	179		131.65	137.6	-4.3239	123.007	133.6
1967	12		179	157.9	147.893	133.941	142.5	133.941	142.5				147.893	172.5		133.941	142.5	-6.00658	147.893	179
1968	1		172.5	183.1	187.582	135.227	145.3	135.227	145.3				187.582	158.5		135.227	145.3	-6.93264	187.582	172.5
1968	2		158.5	168.9	165.218	134.236	145.7	134.236	145.7				165.218	130.5		134.236	145.7	-7.86827	165.218	158.5
1968	3		130.5	141.2	121.59	134.046	148.2	134.046	148.2				121.59	115		134.046	148.2	-9.55086	121.59	130.5
1968	4		115	130.4	104.58	135.706	151.8	135.706	151.8				104.58	180		135.706	151.8	-10.6021	104.58	115
1968	5		180	158.4	148.68	136.343	152.4	136.343	152.4				148.68	156.2		136.343	152.4	-10.5364	148.68	180
1968	6		156.2	146.8	130.41	134.984	150.9	134.984	150.9				130.41	136.2		134.984	150.9	-10.5473	130.41	156.2
1968	7		136.2	141.7	122.377	131.742	148.9	131.742	148.9				122.377	154.8		131.742	148.9	-11.523	122.377	136.2
1968	8		154.8	145.7	128.677	128.284	148.4	128.284	148.4				128.677	166		128.284	148.4	-13.5554	128.677	154.8
1968	9		166	142.5	123.638	129.071	151.5	129.071	151.5				123.638	152.5		129.071	151.5	-14.8045	123.638	166
1968	10		152.5	151.4	137.655	132.713	155.5	132.713	155.5				137.655	121.7		132.713	155.5	-14.6537	137.655	152.5
1968	11		121.7	135.5	112.612	133.79	156.6	133.79	156.6				112.612	155.5		133.79	156.6	-14.566	112.612	121.7
1968	12		155.5	143.8	125.685	134.498	156	134.498	156				125.685	147.8		134.498	156	-13.7831	125.685	155.5
1969	1		147.8	147.8	131.985	135.804	155.7	135.804	155.7				131.985	170.5		135.804	155.7	-12.7782	131.985	147.8
1969	2		170.5	151.5	137.812	135.824	155.1	135.824	155.1				137.812	192.3	% DIFF=	135.824	155.1	-12.4281	137.812	170.5
1969	3		192.3	170.6	167.895	135.634	152.9	135.634	152.9				167.895	151.1	24.1446	135.634	152.9	-11.2925	167.895	192.3
1969	4		151.1	156.5	145.688	135.483	150.7	135.483	150.7				145.688	169.9		135.483	150.7	-10.0977	145.688	151.1
1969	5		169.9	148.7	133.402	136.743	150.4	136.743	150.4				133.402	150.1		136.743	150.4	-9.08058	133.402	169.9
1969	6		150.1	167.3	162.698	137.596	150.1	137.596	150.1				162.698	137.1		137.596	150.1	-8.33049	162.698	150.1
1969	7		137.1	141.1	121.432	137.642	149.9	137.642	149.9				121.432	138.8		137.642	149.9	-8.17754	121.432	137.1
1969	8		138.8	146.6	130.095	139.289	150.7	139.289	150.7				130.095	129.3		139.289	150.7	-7.57196	130.095	138.8
1969	9		129.3	138.7	117.652	139.676	149.2	139.676	149.2				117.652	135.4		139.676	149.2	-6.38321	117.652	129.3
1969	10		135.4	152.9	140.018	139.204	147.4	139.204	147.4				140.018	132.4		139.204	147.4	-5.56055	140.018	135.4
1969	11		132.4	153.2	140.49	141.179	148	141.179	148				140.49	138.6		141.179	148	-4.60874	140.49	132.4
1969	12		138.6	139.1	118.282	142.236	148.5	142.236	148.5				118.282	157.9		142.236	148.5	-4.21843	118.282	138.6
1970	1	1970	157.9	153.2	140.49	142.793	149.5	142.793	149.5				140.49	180.8		142.793	149.5	-4.48599	140.49	157.9
1970	2		180.8	171.2	168.84	143.509	150.1	143.509	150.1				168.84	145.7		143.509	150.1	-4.39124	168.84	180.8
1970	3		145.7	156.8	146.16	143.581	150.3	143.581	150.3				146.16	155.1		143.581	150.3	-4.47043	146.16	145.7
1970	4		155.1	163.1	156.082	143.614	150.3	143.614	150.3				156.082	180.5		143.614	150.3	-4.4486	156.082	155.1
1970	5		180.5	172.2	170.415	143.594	149.8	143.594	149.8				170.415	151.3		143.594	149.8	-4.14282	170.415	180.5
1970	6		151.3	159.9	151.043	144.526	149.1	144.526	149.1				151.043	159.3		144.526	149.1	-3.06778	151.043	151.3
1970	7		159.3	157	146.475	145.386	147	145.386	147				146.475	131.7		145.386	147	-1.09821	146.475	159.3
1970	8		131.7	141.6	122.22	143.246	143	143.246	143				122.22	140.8		143.246	143	0.172203	122.22	131.7
1970	9		140.8	144.8	127.26	137.813	137.6	137.813	137.6				127.26	122.6		137.813	137.6	0.154433	127.26	140.8
1970	10		122.6	147.3	131.198	131.801	132.9	131.801	132.9				131.198	134.8		131.801	132.9	-0.826749	131.198	122.6
1970	11		134.8	158.5	148.838	124.884	126.5	124.884	126.5				148.838	118.2		124.884	126.5	-1.27717	148.838	134.8
1970	12		118.2	148	132.3	117.351	119	117.351	119				132.3	129.2		117.351	119	-1.38603	132.3	118.2
1971	1		129.2	157.4	147.105	111.392	113.8	111.392	113.8				147.105	111.8		111.392	113.8	-2.1161	147.105	129.2
1971	2		111.8	134.4	110.88	107.422	110.1	107.422	110.1				110.88	85.9		107.422	110.1	-2.43273	110.88	111.8
1971	3		85.9	110.8	73.71	103.195	105.3	103.195	105.3				73.71	101.6		103.195	105.3	-1.99875	73.71	85.9
1971	4		101.6	117.5	84.2625	97.9059	100.4	97.9059	100.4				84.2625	81.5		97.9059	100.4	-2.48413	84.2625	101.6
1971	5		81.5	112.4	76.23	92.1375	96.5	92.1375	96.5				76.23	70.7		92.1375	96.5	-4.52073	76.23	81.5
1971	6		70.7	104.9	64.4175	87.2616	94.5	87.2616	94.5				64.4175	114.7		87.2616	94.5	-7.65972	64.4175	70.7
1971	7		114.7	121.2	90.09	82.4316	92.7	82.4316	92.7				90.09	87		82.4316	92.7	-11.0771	90.09	114.7
1971	8		87	116.9	83.3175	79.6556	91.5	79.6556	91.5				83.3175	71.3		79.6556	91.5	-12.9447	83.3175	87
1971	9		71.3	105.1	64.7325	80.9878	93.2	80.9878	93.2				64.7325	73.4		80.9878	93.2	-13.1032	64.7325	71.3
1971	10		73.4	106.4	66.78	81.8081	93.8	81.8081	93.8				66.78	89.5		81.8081	93.8	-12.7845	66.78	73.4
1971	11		89.5	111.5	74.8125	82.8778	94.7	82.8778	94.7				74.8125	116.5		82.8778	94.7	-12.4838	74.8125	89.5
1971	12		116.5	120.7	89.3025	86.4806	98.3	86.4806	98.3				89.3025	87		86.4806	98.3	-12.0238	89.3025	116.5
1972	1		87	111.1	74.1825	89.0794	100.3	89.0794	100.3				74.1825	125.3		89.0794	100.3	-11.1871	74.1825	87
1972	2		125.3	138.4	117.18	90.1819	100.9	90.1819	100.9				117.18	113.5		90.1819	100.9	-10.6225	117.18	125.3
1972	3		113.5	127.1	99.3825	91.6125	102.6	91.6125	102.6				99.3825	89.6		91.6125	102.6	-10.7091	99.3825	113.5
1972	4		89.6	113.7	78.2775	93.1612	104	93.1612	104				78.2775	113.9		93.1612	104	-10.4219	78.2775	89.6
1972	5		113.9	132.5	107.888	93.2728	103.3	93.2728	103.3				107.888	124.7		93.2728	103.3	-9.70686	107.888	113.9
1972	6		124.7	139.7	119.227	91.1006	99.9	91.1006	99.9				119.227	108.3		121.593	131.045	-7.2122	122.499	132.203
1972	7		108.3	126	97.65	88.9284	96.6	88.9284	96.6				97.65	108.9
1972	8		108.9	128.9	102.218	85.3716	92.9	85.3716	92.9				102.218	90.7		% DIFF=			% DIFF=
1972	9		90.7	114.9	80.1675	80.7909	88.2	80.7909	88.2				80.1675	86.9		-7.21305			-7.34009
1972	10		86.9	120.2	88.515	78.4547	85.9	118.756	128.081				119.82	129.526
1972	11		59.2	99.4	55.755	75.7444	83.3
1972	12		64.3	99.7	56.2275	70.5666	78.2	% DIFF=					% DIFF=
1973	1		61.8	99	55.125	65.0344	72.3	-7.28008					-7.49351
1973	2		60.9	96.3	50.8725	59.6006	66.1
1973	3		65.4	99.4	55.755	56.1816	62.8
1973	4		81.8	105.8	65.835	53.4778	60.8
1973	5		60.3	99.1	55.2825	50.0128	57.9
1973	6		56.1	94.2	47.565	47.5256	55.6
1973	7		33.2	87.2	36.54	45.1106	53.4
1973	8		36.6	84.9	32.9175	42.7481	51.4
1973	9		84.1	106.8	67.41	40.2281	49
1973	10		43.7	87.1	36.3825	37.5966	46.6
1973	11		34.3	79.7	24.7275	35.9166	45.4
1973	12		33.3	81.5	27.5625	35.1487	45
1974	1		39.4	80.4	25.83	35.3522	46.8
1974	2		37.3	78.9	23.4675	35.91	49.1
1974	3		30.9	78.4	22.68	34.7353	48.5
1974	4		57.5	86.7	35.7525	34.2038	48.3
1974	5		56.3	92.6	45.045	35.4244	49.4
1974	6		51.5	89	39.375	35.7984	49.3
1974	7		79.1	95.5	49.6125	35.2538	48.6
1974	8		47.9	85.1	33.2325	34.4728	47.3
1974	9		57.2	88.7	38.9025	33.6066	45.8
1974	10		67.2	97.1	52.1325	32.1497	43.2
1974	11		35.9	88.3	38.2725	29.7544	39.3
1974	12		29.6	78.6	22.995	27.2541	36.1
1975	1		27.3	75	17.325	25.095	33
1975	2		16.7	72.4	13.23	24.5569	31.8
1975	3		16.9	71.7	12.1275	24.5109	30.6
1975	4		7.7	71.2	11.34	22.5356	26.8
1975	5		13.1	71.6	11.97	20.5012	24.2
1975	6		16.7	71.9	12.4425	19.4841	23.2
1975	7		40.4	79.7	24.7275	18.9	21.8
1975	8		56.7	92.7	45.2025	18.4931	20.7
1975	9		20.3	80.4	25.83	18.5325	20.9
1975	10		13.6	75.3	17.7975	19.1756	22.3
1975	11		27.9	79.1	23.7825	19.5825	23.3
1975	12		11.6	72.3	13.0725	19.6809	23.6
1976	1		11.9	72.4	13.23	19.0903	22.1
1976	2		6.4	68.8	7.56	17.3841	19.2
1976	3		31.5	75.9	18.7425	15.9009	17.8
1976	4		27.3	76.8	20.16	15.4809	18.4
1976	5		18.2	72.2	12.915	14.9756	18.3
1976	6		17.9	72.8	13.86	14.595	17.9
1976	7		2.9	69.8	9.135	14.8903	18.8
1976	8		24.1	76.6	19.845	15.8091	20.5
1976	9		20	73.9	15.5925	16.5572	20.8
1976	10		29.7	75.4	17.955	16.6425	19.7
1976	11		7.9	71.3	11.4975	17.3381	19.7
1976	12		22.3	74.3	16.2225	19.3659	21.6
1977	1		23.8	74.9	17.1675	21.7022	24.3
1977	2		33.3	80.3	25.6725	23.2575	26.3
1977	3		13	75.8	18.585	25.6725	28.8
1977	4		19	78.2	22.365	28.8159	31.9
1977	5		27	81.4	27.405	31.5197	34.7
1977	6		54.9	94.5	48.0375	34.4662	37.7
1977	7		30.6	83.7	31.0275	38.1281	41.4
1977	8		43	86.4	35.28	44.2116	47.6
1977	9		62.4	100.9	58.1175	52.4803	55.8
1977	10		62.1	96.3	50.8725	61.4578	64.8
1977	11		41.6	91.6	43.47	70.6847	73.7
1977	12		61.4	98.9	54.9675	78.5991	80.7
1978	1		73.7	106.1	66.3075	85.4241	86.9	85.4241	86.9				66.3075	132.6
1978	2		132.6	141.8	122.535	90.8184	91.5	90.8184	91.5				122.535	108.4
1978	3		108.4	140.3	120.173	96.6722	98.7	96.6722	98.7				120.173	141.2
1978	4		141.2	150.5	136.237	104.514	109	104.514	109				136.237	117.1		104.514	109	-4.11525	136.237	141.2
1978	5		117.1	149.7	134.977	112.219	117.8	112.219	117.8				134.977	134.6		112.219	117.8	-4.7379	134.977	117.1
1978	6		134.6	146.8	130.41	120.599	126.6	120.599	126.6				130.41	99.7		120.599	126.6	-4.74008	130.41	134.6
1978	7		99.7	135.4	112.455	131.197	138	131.197	138				112.455	82.4		131.197	138	-4.92935	112.455	99.7
1978	8		82.4	116.9	83.3175	140.89	147.3	140.89	147.3				83.3175	195.7		140.89	147.3	-4.35145	83.3175	82.4
1978	9		195.7	159.6	150.57	147.518	153.6	147.518	153.6				150.57	177.1		147.518	153.6	-3.95935	150.57	195.7
1978	10		177.1	157.1	146.632	151.994	157.3	151.994	157.3				146.632	138.5		151.994	157.3	-3.37313	146.632	177.1
1978	11		138.5	148.2	132.615	154.862	160.4	154.862	160.4				132.615	173.9		154.862	160.4	-3.4527	132.615	138.5
1978	12		173.9	170	166.95	158.694	166.7	158.694	166.7				166.95	235.9		158.694	166.7	-4.80241	166.95	173.9
1979	1		235.9	196.5	208.688	163.629	175.2	163.629	175.2				208.688	194.7		163.629	175.2	-6.60424	208.688	235.9
1979	2		194.7	199.1	212.782	169.936	185.4	169.936	185.4				212.782	195.3		169.936	185.4	-8.34092	212.782	194.7
1979	3		195.3	184	189	176.682	193.3	176.682	193.3				189	143.7		176.682	193.3	-8.5969	189	195.3
1979	4		143.7	175	174.825	183.376	199.9	183.376	199.9				174.825	190.3		183.376	199.9	-8.26616	174.825	143.7
1979	5		190.3	168.9	165.218	192.426	208.5	192.426	208.5				165.218	211.7		192.426	208.5	-7.70953	165.218	190.3
1979	6		211.7	186	192.15	199.369	216.7	199.369	216.7				192.15	225.7		199.369	216.7	-7.99781	192.15	211.7
1979	7		225.7	171.4	169.155	201.357	219.5	201.357	219.5				169.155	201.4		201.357	219.5	-8.26552	169.155	225.7
1979	8		201.4	177	177.975	201.298	220.1	201.298	220.1				177.975	266.9	% DIFF=	201.298	220.1	-8.54242	177.975	201.4
1979	9		266.9	202.3	217.823	199.887	220.4	199.887	220.4				217.823	263.6	-1.35338	199.887	220.4	-9.30708	217.823	266.9
1979	10		263.6	216.4	240.03	200.99	223.4	200.99	223.4				240.03	259.5		200.99	223.4	-10.0315	240.03	263.6
1979	11		259.5	226.8	256.41	207.191	229.8	207.191	229.8				256.41	249.6		207.191	229.8	-9.83845	256.41	259.5
1979	12		249.6	197.2	209.79	212.015	232.9	212.015	232.9				209.79	226.1		212.015	232.9	-8.9675	209.79	249.6
1980	1	1980	226.1	199.6	213.57	214.161	232	214.161	232				213.57	219.4		214.161	232	-7.68939	213.57	226.1
1980	2		219.4	195.1	206.482	214.994	230.2	214.994	230.2				206.482	178.7		214.994	230.2	-6.60553	206.482	219.4
1980	3		178.7	166.5	161.438	213.478	227.9	213.478	227.9				161.438	232.2		213.478	227.9	-6.32816	161.438	178.7
1980	4		232.2	209.3	228.848	211.516	224.6	211.516	224.6				228.848	254.7		211.516	224.6	-5.8255	228.848	232.2
1980	5		254.7	229.1	260.032	209.751	221.3	209.751	221.3				260.032	222.7		209.751	221.3	-5.21888	260.032	254.7
1980	6		222.7	199.3	213.098	210.289	219.1	210.289	219.1				213.098	192.9		210.289	219.1	-4.02157	213.098	222.7
1980	7		192.9	190.8	199.71	209.698	216.1	209.698	216.1				199.71	191.7		209.698	216.1	-2.96246	199.71	192.9
1980	8		191.7	170.3	167.423	207.979	212	207.979	212				167.423	219.6		207.979	212	-1.89682	167.423	191.7
1980	9		219.6	185.9	191.993	210.676	211.5	210.676	211.5				191.993	233.3		210.676	211.5	-0.389628	191.993	219.6
1980	10		233.3	202.9	218.768	214.095	211.9	214.095	211.9				218.768	209.5		214.095	211.9	1.03587	218.768	233.3
1980	11		209.5	213.4	235.305	213.124	209.1	213.124	209.1				235.305	246.9		213.124	209.1	1.92432	235.305	209.5
1980	12		246.9	218.8	243.81	208.688	202.8	208.688	202.8				243.81	156.6		208.688	202.8	2.90311	243.81	246.9
1981	1		156.6	169	165.375	206.719	199.6	206.719	199.6				165.375	189.9		206.719	199.6	3.56651	165.375	156.6
1981	2		189.9	199.5	213.412	210.86	202.2	210.86	202.2				213.412	196.6		210.86	202.2	4.28273	213.412	189.9
1981	3		196.6	203.2	219.24	216.877	205.4	216.877	205.4				219.24	225.3		216.877	205.4	5.58788	219.24	196.6
1981	4		225.3	224.7	253.102	220.546	205.7	220.546	205.7				253.102	194.7		220.546	205.7	7.21728	253.102	225.3
1981	5		194.7	198.9	212.468	221.189	204.1	221.189	204.1				212.468	131.6		221.189	204.1	8.37289	212.468	194.7
1981	6		131.6	161.9	154.192	219.384	200.9	219.384	200.9				154.192	205.3		219.384	200.9	9.20078	154.192	131.6
1981	7		205.3	198.2	211.365	218.531	198.5	218.531	198.5				211.365	242.5		218.531	198.5	10.0913	211.365	205.3
1981	8		242.5	226	255.15	219.437	199.9	219.437	199.9				255.15	245.3		219.437	199.9	9.77332	255.15	242.5
1981	9		245.3	221.9	248.692	220.388	202.7	220.388	202.7				248.692	216.2		220.388	202.7	8.72641	248.692	245.3
1981	10		216.2	222.8	250.11	216.668	201.4	216.668	201.4				250.11	186		216.668	201.4	7.58069	250.11	216.2
1981	11		186	203.3	219.398	209.265	196	209.265	196				219.398	195.4		209.265	196	6.76786	219.398	186
1981	12		195.4	201.4	216.405	206.935	194.1	206.935	194.1				216.405	149.8		206.935	194.1	6.61273	216.405	195.4
1982	1		149.8	173.4	172.305	205.761	192.7	205.761	192.7				172.305	230.9		205.761	192.7	6.7777	172.305	149.8
1982	2		230.9	208.9	228.218	200.032	186.6	200.032	186.6				228.218	221.1		200.032	186.6	7.19805	228.218	230.9
1982	3		221.1	208.3	227.273	192.898	180	192.898	180				227.273	170.3		192.898	180	7.16563	227.273	221.1
1982	4		170.3	162.9	155.768	185.24	173.4	185.24	173.4				155.768	119.3		185.24	173.4	6.82796	155.768	170.3
1982	5		119.3	147.9	132.143	178.579	167.5	178.579	167.5				132.143	163.7		178.579	167.5	6.61418	132.143	119.3
1982	6		163.7	177.4	178.605	175.442	164	175.442	164				178.605	139.4		175.442	164	6.97675	178.605	163.7
1982	7		139.4	164.8	158.76	172.561	161.5	172.561	161.5				158.76	161.9		172.561	161.5	6.84888	158.76	139.4
1982	8		161.9	172.1	170.257	164.358	153.5	164.358	153.5				170.257	167.4		164.358	153.5	7.07349	170.257	161.9
1982	9		167.4	167.1	162.382	152.526	141.4	152.526	141.4				162.382	134.3		152.526	141.4	7.86819	162.382	167.4
1982	10		134.3	160.9	152.618	143.732	133.3	143.732	133.3				152.618	127.5		143.732	133.3	7.82586	152.618	134.3
1982	11		127.5	163.7	157.027	140.405	131.3	140.405	131.3				157.027	169		140.405	131.3	6.93426	157.027	127.5
1982	12		169	193.2	203.49	137.642	130.5	137.642	130.5				203.49	115.5		137.642	130.5	5.4727	203.49	169
1983	1		115.5	137.7	116.077	133.042	127.9	133.042	127.9				116.077	73.1		133.042	127.9	4.01999	116.077	115.5
1983	2		73.1	119.6	87.57	127.772	123.9	127.772	123.9				87.57	88.7		127.772	123.9	3.125	87.57	73.1
1983	3		88.7	117.3	83.9475	121.111	117.1	121.111	117.1				83.9475	109.6		121.111	117.1	3.42522	83.9475	88.7
1983	4		109.6	119.9	88.0425	114.155	110.5	114.155	110.5				88.0425	132.5		114.155	110.5	3.30741	88.0425	109.6
1983	5		132.5	140.2	120.015	106.122	104.5	106.122	104.5				120.015	131.5		106.122	104.5	1.55233	120.015	132.5
1983	6		131.5	143	124.425	94.5722	95.9	94.5722	95.9				124.425	108.9		182.375	187.447	0.174028	183.256	189.482
1983	7		108.9	129.1	102.532	86.1722	89.1	86.1722	89.1				102.532	96
1983	8		96	127.5	100.013	85.6669	88.9	85.6669	88.9				100.013	69.9		% DIFF=			% DIFF=
1983	9		69.9	110.2	72.765	87.0516	91.7	87.0516	91.7				72.765	72.5		-2.70552			-3.28574
1983	10		72.5	111.8	75.285	87.9244	92	87.9244	92				75.285	45.7
1983	11		45.7	90.4	41.58	87.9703	89.7	87.9703	89.7				41.58	45.6
1983	12		45.6	90.5	41.7375	84.7809	85.5	84.7809	85.5				41.7375	74.8
1984	1		74.8	112.4	76.23	79.7672	80.5	169.366	170.004				169.851	170.437
1984	2		110.2	137.2	115.29	74.6091	75.8
1984	3		116.7	120.8	89.46	69.8184	71.2	% DIFF=					% DIFF=
1984	4		90.4	129.7	103.477	65.2247	66.8	-0.375649					-0.344334
1984	5		96.9	131.1	105.682	61.6481	63.5
1984	6		65.1	103.5	62.2125	59.4956	61.7
1984	7		55.7	92.2	44.415	55.7353	58.3
1984	8		35	85.8	34.335	48.8053	52.2
1984	9		22.6	78.9	23.4675	41.3503	44.3
1984	10		12.6	73.1	14.3325	34.6369	37.2
1984	11		26.5	74.6	16.695	27.8709	31.6
1984	12		21.4	73.5	14.9625	23.0081	27.4
1985	1		17.8	72.1	12.7575	20.6522	25.2
1985	2		20.7	71.9	12.4425	19.1166	23.5
1985	3		16.9	72.5	13.3875	17.7253	21.7
1985	4		20.4	75.7	18.4275	17.2266	21.3
1985	5		32.4	82	28.35	17.1675	21.4
1985	6		28.3	78.5	22.8375	16.9641	20.8
1985	7		39.9	81.3	27.2475	16.8131	19.9
1985	8		10.1	73.3	14.6475	17.325	19.6
1985	9		4.3	70.2	9.765	18.1584	19.8
1985	10		22	74.2	16.065	18.3947	19.7
1985	11		17.9	72.6	13.545	17.8762	19.1
1985	12		15.8	72.4	13.23	16.7869	17.3
1986	1		2.8	70.9	10.8675	15.6319	15.2
1986	2		27.9	80.9	26.6175	14.8444	14.3
1986	3		13.8	76.2	19.215	14.5819	14.3
1986	4		22.4	75.6	18.27	15.0675	15.1
1986	5		16.1	74.2	16.065	15.7959	15.8
1986	6		0.6	69.7	8.9775	15.855	15.2
1986	7		18.1	72.5	13.3875	15.6778	15.1
1986	8		9.9	70.1	9.6075	14.9034	14.4
1986	9		5.1	69.4	8.505	13.9847	13.5
1986	10		40.1	82.4	28.98	14.4441	14.7
1986	11		15.4	75.5	18.1125	16.1175	16.6
1986	12		5.8	70.4	10.08	17.8434	18.3
1987	1		9.8	70.2	9.765	19.4972	19.9
1987	2		3.4	69.8	9.135	21.8991	22.3
1987	3		17.4	73.3	14.6475	24.5044	25.5
1987	4		46	85.5	33.8625	26.6438	28
1987	5		39.1	89.8	40.635	29.1703	30.3
1987	6		18.8	80.4	25.83	32.0972	32.7
1987	7		38.2	87	36.225	35.7394	36.2
1987	8		47.9	92.2	44.415	40.1362	40.5
1987	9		42.2	87	36.225	44.9334	45.3
1987	10		63.4	97.4	52.605	50.0916	51
1987	11		48.8	99	55.125	54.4359	55.1
1987	12		29.1	91.5	43.3125	60.4406	60.9
1988	1		70.5	104.6	63.945	69.2344	69.2
1988	2		45.4	102.4	60.48	78.1856	76.9
1988	3		91.2	113.8	78.435	86.9072	84.9	86.9072	84.9				78.435	108.8
1988	4		108.8	123.6	93.87	95.9897	93	95.9897	93				93.87	74.2
1988	5		74.2	117.9	84.8925	104.199	101.4	104.199	101.4				84.8925	124.3		104.199	101.4	2.76072	84.8925	74.2
1988	6		124.3	143.8	125.685	114.424	114.3	114.424	114.3				125.685	131.4		114.424	114.3	0.108268	125.685	124.3
1988	7		131.4	157.6	147.42	129.203	128.5	129.203	128.5				147.42	139.4		129.203	128.5	0.546693	147.42	131.4
1988	8		139.4	158	148.05	144.808	141.1	144.808	141.1				148.05	142.7		144.808	141.1	2.62801	148.05	139.4
1988	9		142.7	154.1	141.907	158.183	151.2	158.183	151.2				141.907	156.5		158.183	151.2	4.61806	141.907	142.7
1988	10		156.5	168.7	164.902	168.453	156.9	168.453	156.9				164.902	156.8		168.453	156.9	7.36317	164.902	156.5
1988	11		156.8	152.8	139.86	177.89	164.4	177.89	164.4				139.86	231.2		177.89	164.4	8.20541	139.86	156.8
1988	12		231.2	193.5	203.963	189.696	176.1	189.696	176.1				203.963	210.1		189.696	176.1	7.7204	203.963	231.2
1989	1		210.1	227.8	257.985	198.463	184.8	198.463	184.8				257.985	208.7		198.463	184.8	7.39347	257.985	210.1
1989	2		208.7	217	240.975	204.678	190.7	204.678	190.7				240.975	170.4		204.678	190.7	7.32974	240.975	208.7
1989	3		170.4	203	218.925	213.787	198	213.787	198				218.925	166.3		213.787	198	7.97301	218.925	170.4
1989	4		166.3	190.9	199.868	221.202	203.8	221.202	203.8				199.868	195.4		221.202	203.8	8.53886	199.868	166.3
1989	5		195.4	194.4	205.38	228.808	209.5	228.808	209.5				205.38	284.5		228.808	209.5	9.21629	205.38	195.4
1989	6		284.5	247.2	288.54	234.714	212.1	234.714	212.1				288.54	180.5	% DIFF=	234.714	212.1	10.6621	288.54	284.5
1989	7		180.5	187.8	194.985	233.953	212	233.953	212				194.985	232	59.856	233.953	212	10.3552	194.985	180.5
1989	8		232	222.5	249.637	229.537	211.1	229.537	211.1				249.637	225.1		229.537	211.1	8.73357	249.637	232
1989	9		225.1	228.4	258.93	225.671	210.5	225.671	210.5				258.93	212.2		225.671	210.5	7.20724	258.93	225.1
1989	10		212.2	207.4	225.855	224.339	212.4	224.339	212.4				225.855	238.2		224.339	212.4	5.62103	225.855	212.2
1989	11		238.2	230	261.45	224.031	212.5	224.031	212.5				261.45	211.4		224.031	212.5	5.42618	261.45	238.2
1989	12		211.4	206.3	224.123	219.352	206.2	219.352	206.2				224.123	227.4		219.352	206.2	6.37806	224.123	211.4
1990	1	1990	227.4	203.4	219.555	214.62	201.2	214.62	201.2				219.555	171.8		214.62	201.2	6.66998	219.555	227.4
1990	2		171.8	174.1	173.407	214.909	202.4	214.909	202.4				173.407	191.7		214.909	202.4	6.18021	173.407	171.8
1990	3		191.7	187	193.725	212.054	200.9	212.054	200.9				193.725	189.7		212.054	200.9	5.55205	193.725	191.7
1990	4		189.7	186.6	193.095	207.093	198.1	207.093	198.1				193.095	175.2		207.093	198.1	4.53953	193.095	189.7
1990	5		175.2	194	204.75	202.092	195.1	202.092	195.1				204.75	153.3		202.092	195.1	3.5839	204.75	175.2
1990	6		153.3	176.3	176.873	198.319	192	198.319	192				176.873	191.1		198.319	192	3.29102	176.873	153.3
1990	7		191.1	186.6	193.095	199.034	190.1	199.034	190.1				193.095	252.1		199.034	190.1	4.69966	193.095	191.1
1990	8		252.1	228.1	258.457	204.402	191.6	204.402	191.6				258.457	169.1		204.402	191.6	6.68173	258.457	252.1
1990	9		169.1	179.3	181.598	211.208	194.6	211.208	194.6				181.598	199.4		211.208	194.6	8.53417	181.598	169.1
1990	10		199.4	180.9	184.118	214.758	195.2	214.758	195.2				184.118	178.8		214.758	195.2	10.0194	184.118	199.4
1990	11		178.8	180.3	183.173	215.677	195.2	215.677	195.2				183.173	197.1		215.677	195.2	10.49	183.173	178.8
1990	12		197.1	198.5	211.838	218.138	197.8	218.138	197.8				211.838	195.3		218.138	197.8	10.2819	211.838	197.1
1991	1		195.3	222.1	249.007	222.685	202.8	222.685	202.8				249.007	240.3		222.685	202.8	9.80538	249.007	195.3
1991	2		240.3	237.2	272.79	223.978	204.4	223.978	204.4				272.79	197		223.978	204.4	9.57834	272.79	240.3
1991	3		197	227.6	257.67	223.361	203.9	223.361	203.9				257.67	197.6		223.361	203.9	9.54451	257.67	197
1991	4		197.6	200.1	214.357	224.825	203.8	224.825	203.8				214.357	166.9		224.825	203.8	10.3163	214.357	197.6
1991	5		166.9	194.5	205.537	225.291	202.9	225.291	202.9				205.537	224.7		225.291	202.9	11.0353	205.537	166.9
1991	6		224.7	213.3	235.148	225.717	202.8	225.717	202.8				235.148	240.2		225.717	202.8	11.3004	235.148	224.7
1991	7		240.2	218.9	243.968	226.177	203.5	226.177	203.5				243.968	240.8		226.177	203.5	11.1433	243.968	240.2
1991	8		240.8	215.5	238.612	224.72	203.3	224.72	203.3				238.612	168.9		224.72	203.3	10.536	238.612	240.8
1991	9		168.9	182.5	186.637	220.211	200.9	220.211	200.9				186.637	197.1		220.211	200.9	9.61237	186.637	168.9
1991	10		197.1	200	214.2	213.754	196.7	213.754	196.7				214.2	159.5		213.754	196.7	8.66993	214.2	197.1
1991	11		159.5	168.3	164.273	206.752	191.4	206.752	191.4				164.273	212.6		206.752	191.4	8.02067	164.273	159.5
1991	12		212.6	217	240.975	196.304	183.1	196.304	183.1				240.975	198.3		196.304	183.1	7.21139	240.975	212.6
1992	1		198.3	210.6	230.895	184.8	172.6	184.8	172.6				230.895	230.7		184.8	172.6	7.06837	230.895	198.3
1992	2		230.7	226.5	255.938	173.46	161.1	173.46	161.1				255.938	151		173.46	161.1	7.67225	255.938	230.7
1992	3		151	169.6	166.32	163.295	151.8	163.295	151.8				166.32	142.2		163.295	151.8	7.57226	166.32	151
1992	4		142.2	159.7	150.727	154.521	146	154.521	146				150.727	94.3		154.521	146	5.83604	150.727	142.2
1992	5		94.3	128.2	101.115	148.253	142.1	148.253	142.1				101.115	98.5		148.253	142.1	4.33036	101.115	94.3
1992	6		98.5	120.4	88.83	141.127	137.1	141.127	137.1				88.83	114.2		141.127	137.1	2.93695	88.83	98.5
1992	7		114.2	136.5	114.188	129.596	128.5	129.596	128.5				114.188	91.9		129.596	128.5	0.853113	114.188	114.2
1992	8		91.9	125.1	96.2325	117.731	119.3	117.731	119.3				96.2325	94		117.731	119.3	-1.31496	96.2325	91.9
1992	9		94	118	85.05	109.725	113	109.725	113				85.05	133.4		109.725	113	-2.89823	85.05	94
1992	10		133.4	130.8	105.21	104.632	109	104.632	109				105.21	129.6		104.632	109	-4.00688	105.21	133.4
1992	11		129.6	142	122.85	100.938	106.3	100.938	106.3				122.85	122		100.938	106.3	-5.04439	122.85	129.6
1992	12		122	134.7	111.352	99.5663	104.5	99.5663	104.5				111.352	81.4		99.5663	104.5	-4.72129	111.352	122
1993	1		81.4	117.2	83.79	96.8166	101.9	96.8166	101.9				83.79	127.8		96.8166	101.9	-4.98865	83.79	81.4
1993	2		127.8	139.1	118.282	92.6559	99.3	92.6559	99.3				118.282	102.4		187.999	176.218	5.954	189.345	177.375
1993	3		102.4	135	111.825	88.7709	95.4	88.7709	95.4				111.825	94.4
1993	4		94.4	116.7	83.0025	84.7547	90.2	84.7547	90.2				83.0025	78.8		% DIFF=			% DIFF=
1993	5		78.8	114.9	80.1675	79.5506	84.2	180.081	169.471				181.905	171.332		6.68558			6.74837
1993	6		69.6	112.8	76.86	74.2087	78.6
1993	7		80.4	102.2	60.165	71.6428	76.5	% DIFF=					% DIFF=
1993	8		62.5	96	50.4	68.5059	73.6	6.26051					6.17083
1993	9		31.2	87.9	37.6425	62.7703	68.3
1993	10		71.1	99.7	56.2275	57.3562	63.2
1993	11		48.2	93.8	46.935	52.7494	58.4
1993	12		68.4	101.5	59.0625	48.3984	55.1
1994	1		84.9	111.3	74.4975	44.9794	52.6
1994	2		54.9	97.2	52.29	42.5513	50.2
1994	3		47.5	89.5	40.1625	40.845	49.4
1994	4		27.4	79.7	24.7275	39.4931	49.6
1994	5		29.8	81.7	27.8775	37.7016	48.7
1994	6		39.7	79.7	24.7275	34.9847	46.4
1994	7		50.6	83.2	30.24	31.1784	42.7
1994	8		34.3	78	22.05	28.2253	40.1
1994	9		40.5	79.9	25.0425	26.9784	39.7
1994	10		67.1	87.1	36.3825	26.5322	39.4
1994	11		29.5	79.1	23.7825	26.1319	38.7
1994	12		32.2	74.8	17.01	25.725	37.6
1995	1		32.6	80	25.2	25.1672	35.6
1995	2		45.8	83.5	30.7125	24.5634	33.7
1995	3		46.3	84.2	31.815	23.9466	32
1995	4		21.6	78.2	22.365	22.8506	29.4
1995	5		19.4	77.1	20.6325	21.7941	27.3
1995	6		22.5	78.1	22.2075	21.0722	25.9
1995	7		20.4	76.3	19.3725	20.2584	24.4
1995	8		18.2	75.7	18.4275	18.8409	22
1995	9		15.7	72.8	13.86	17.01	19
1995	10		30.6	77.5	21.2625	15.5334	17
1995	11		14	72.6	13.545	14.6344	15.9
1995	12		14.9	70.3	9.9225	13.8666	15.1
1996	1		13.3	72.1	12.7575	13.2694	14.5
1996	2		7.7	69.8	9.135	12.9872	14.2
1996	3		12.6	70	9.45	12.7116	13.7
1996	4		6.8	69.9	9.2925	11.9569	12
1996	5		7.6	71.7	12.1275	11.6616	11.2
1996	6		16.5	71.8	12.285	12.2719	11.6
1996	7		11.8	73.5	14.9625	12.5672	11.3
1996	8		19.7	74.2	16.065	12.6788	11.2
1996	9		3	70.1	9.6075	13.0069	11.3
1996	10		0.7	68.7	7.4025	13.4597	12
1996	11		24.9	76.9	20.3175	14.0306	13.4
1996	12		14	75.3	17.7975	14.4769	14.3
1997	1		7.4	71.6	11.97	14.6147	14.5
1997	2		11	72	12.6	15.0544	15.2
1997	3		12.1	72.8	13.86	17.2791	18.3
1997	4		23	74	15.75	20.0813	22
1997	5		25.4	76.3	19.3725	22.4503	24.4
1997	6		20.8	74	15.75	25.1344	27.2
1997	7		12.9	73.4	14.805	27.7069	30.4
1997	8		35.7	81	26.775	30.1941	33.6
1997	9		59.7	97.2	52.29	33.7575	38.2
1997	10		32.8	84.3	31.9725	38.3644	43.1
1997	11		50.4	97.4	52.605	42.8072	47.1
1997	12		55.5	95.7	49.9275	47.4338	52
1998	1		44.5	90.4	41.58	52.8216	58.4
1998	2		50.2	91.1	42.6825	59.5613	65.4
1998	3		82	108	69.3	66.1894	72
1998	4		70.6	109	70.875	71.1047	76.9
1998	5		74	109	70.875	75.8297	80.8
1998	6		90.5	111.8	75.285	81.7031	85.4	81.7031	85.4				75.285	96.7
1998	7		96.7	117.7	84.5775	88.1016	89.8	88.1016	89.8				84.5775	121.1
1998	8		121.1	139.4	118.755	94.3491	93.5	94.3491	93.5				118.755	132
1998	9		132	139.8	119.385	98.5753	96.4	98.5753	96.4				119.385	78.5
1998	10		78.5	116.6	82.845	100.275	98.2	100.275	98.2				82.845	97.3
1998	11		97.3	137.1	115.132	103.681	102.3	103.681	102.3				115.132	119.2		103.681	102.3	1.34989	115.132	97.3
1998	12		119.2	145.5	128.362	110.657	110.4	110.657	110.4				128.362	86		110.657	110.4	0.232677	128.362	119.2
1999	1		86	138.1	116.707	118.315	118.4	118.315	118.4				116.707	98		118.315	118.4	-0.0715266	116.707	86
1999	2		98	138.6	117.495	124.149	122.5	124.149	122.5				117.495	103.5		124.149	122.5	1.34643	117.495	98
1999	3		103.5	124.9	95.9175	126.315	122.3	126.315	122.3				95.9175	93.6		126.315	122.3	3.28291	95.9175	103.5
1999	4		93.6	118	85.05	129.235	125	129.235	125				85.05	149.6		129.235	125	3.38825	85.05	93.6
1999	5		149.6	151.9	138.442	135.627	132.6	135.627	132.6				138.442	207.2		135.627	132.6	2.28295	138.442	149.6
1999	6		207.2	175.2	175.14	140.175	136.3	140.175	136.3				175.14	173.5		140.175	136.3	2.84299	175.14	207.2
1999	7		173.5	171	168.525	142.406	138.1	142.406	138.1				168.525	142.3		142.406	138.1	3.11821	168.525	173.5
1999	8		142.3	175	174.825	145.392	142.9	145.392	142.9				174.825	106.3		145.392	142.9	1.74401	174.825	142.3
1999	9		106.3	137.2	115.29	152.722	150.5	152.722	150.5				115.29	168.7		152.722	150.5	1.47674	115.29	106.3
1999	10		168.7	163.7	157.027	162.481	159.3	162.481	159.3				157.027	188.3		162.481	159.3	1.99682	157.027	168.7
1999	11		188.3	187.4	194.355	169.326	164.1	169.326	164.1				194.355	116.8		169.326	164.1	3.18441	194.355	188.3
1999	12		116.8	164.5	158.287	172.417	164	172.417	164				158.287	133.1		172.417	164	5.13205	158.287	116.8
2000	1	2000	133.1	153.1	140.332	175.744	166.1	175.744	166.1				140.332	165.7		175.744	166.1	5.80599	140.332	133.1
2000	2		165.7	169.1	165.532	177.883	170.6	177.883	170.6				165.532	217.7		177.883	170.6	4.26912	165.532	165.7
2000	3		217.7	206.1	223.807	180.429	174.3	180.429	174.3				223.807	191.5		180.429	174.3	3.51657	223.807	217.7
2000	4		191.5	185.5	191.362	183.678	175.2	183.678	175.2				191.362	165.9		183.678	175.2	4.83893	191.362	191.5
2000	5		165.9	188.7	196.402	183.048	172.9	183.048	172.9				196.402	188		183.048	172.9	5.86918	196.402	165.9
2000	6		188	185.5	191.362	182.47	172.7	182.47	172.7				191.362	244.3		182.47	172.7	5.65739	191.362	188
2000	7		244.3	211.4	232.155	183.251	174.2	183.251	174.2				232.155	180.5	% DIFF=	183.251	174.2	5.1959	232.155	244.3
2000	8		180.5	167.2	162.54	182.083	172.8	182.083	172.8				162.54	156	50.2576	182.083	172.8	5.37218	162.54	180.5
2000	9		156	183.8	188.685	178.408	168.8	178.408	168.8				188.685	141.6		178.408	168.8	5.69202	188.685	156
2000	10		141.6	166.6	161.595	176.032	165.3	176.032	165.3				161.595	158.1		176.032	165.3	6.49274	161.595	141.6
2000	11		158.1	174.9	174.668	173.217	163.1	173.217	163.1				174.668	143.3		173.217	163.1	6.20306	174.668	158.1
2000	12		143.3	168.2	164.115	170.395	162.7	170.395	162.7				164.115	142.6		170.395	162.7	4.72976	164.115	143.3
2001	1		142.6	161.3	153.248	165.007	158.3	165.007	158.3				153.248	121.5		165.007	158.3	4.23721	153.248	142.6
2001	2		121.5	143.1	124.582	160.027	152.5	160.027	152.5				124.582	165.8		160.027	152.5	4.93545	124.582	121.5
2001	3		165.8	176.1	176.557	163.459	155.1	163.459	155.1				176.557	161.7		163.459	155.1	5.38926	176.557	165.8
2001	4		161.7	179.3	181.598	169.522	160.7	169.522	160.7				181.598	142.1		169.522	160.7	5.49004	181.598	161.7
2001	5		142.1	152	138.6	174.326	163.7	174.326	163.7				138.6	202.9		174.326	163.7	6.4913	138.6	142.1
2001	6		202.9	179.2	181.44	180.442	167.4	180.442	167.4				181.44	123		180.442	167.4	7.79122	181.44	202.9
2001	7		123	135.6	112.77	188.239	172	188.239	172				112.77	161.5		188.239	172	9.44113	112.77	123
2001	8		161.5	167.1	162.382	195.838	175.8	195.838	175.8				162.382	238.2		195.838	175.8	11.3983	162.382	161.5
2001	9		238.2	236.2	271.215	199.73	177.1	199.73	177.1				271.215	194.1		199.73	177.1	12.7779	271.215	238.2
2001	10		194.1	206.6	224.595	200.655	177.3	200.655	177.3				224.595	176.6		200.655	177.3	13.1726	224.595	194.1
2001	11		176.6	208.1	226.957	203.424	180.3	203.424	180.3				226.957	213.4		203.424	180.3	12.8255	226.957	176.6
2001	12		213.4	228.2	258.615	203.726	179.1	203.726	179.1				258.615	184.6		203.726	179.1	13.75	258.615	213.4
2002	1		184.6	220.1	245.857	204.894	177.6	204.894	177.6				245.857	170.2		204.894	177.6	15.3685	245.857	184.6
2002	2		170.2	200.1	214.357	209.153	179.7	209.153	179.7				214.357	147.1		209.153	179.7	16.3903	214.357	170.2
2002	3		147.1	178.4	180.18	206.719	178.2	206.719	178.2				180.18	186.9		206.719	178.2	16.0038	180.18	147.1
2002	4		186.9	191.1	200.182	200.215	174.4	200.215	174.4				200.182	187.5		200.215	174.4	14.8024	200.182	186.9
2002	5		187.5	182.4	186.48	194.722	171.3	194.722	171.3				186.48	128.8		194.722	171.3	13.6734	186.48	187.5
2002	6		128.8	153.4	140.805	186.92	166.9	186.92	166.9				140.805	161		186.92	166.9	11.995	140.805	128.8
2002	7		161	179.2	181.44	176.643	161.5	176.643	161.5				181.44	175.6		176.643	161.5	9.37635	181.44	161
2002	8		175.6	188.4	195.93	166.182	155.4	166.182	155.4				195.93	187.9		166.182	155.4	6.93834	195.93	175.6
2002	9		187.9	177.8	179.235	157.894	149.5	157.894	149.5				179.235	151.2		157.894	149.5	5.61455	179.235	187.9
2002	10		151.2	165.9	160.493	150.577	143.9	150.577	143.9				160.493	147.2		150.577	143.9	4.63972	160.493	151.2
2002	11		147.2	165.1	159.232	142.203	136	142.203	136				159.232	135.3		142.203	136	4.56089	159.232	147.2
2002	12		135.3	152.3	139.073	136.71	131.4	136.71	131.4				139.073	133.5		136.71	131.4	4.0411	139.073	135.3
2003	1		133.5	139.4	118.755	132.293	129.6	132.293	129.6				118.755	75.7		132.293	129.6	2.07827	118.755	133.5
2003	2		75.7	121.4	90.405	125.042	125.7	125.042	125.7				90.405	100.7		125.042	125.7	-0.523568	90.405	75.7
2003	3		100.7	130.8	105.21	116.668	118.7	116.668	118.7				105.21	97.9		116.668	118.7	-1.71177	105.21	100.7
2003	4		97.9	127.2	99.54	111.405	111.9	111.405	111.9				99.54	86.8		111.405	111.9	-0.442359	99.54	97.9
2003	5		86.8	118.7	86.1525	108.57	107	108.57	107				86.1525	118.7		108.57	107	1.46729	86.1525	86.8
2003	6		118.7	133.4	109.305	104.088	101.7	104.088	101.7				109.305	128.3		104.088	101.7	2.3479	109.305	118.7
2003	7		128.3	131.9	106.943	99.5006	96	99.5006	96				106.943	115.4		162.765	152.984	5.87981	163.184	152.786
2003	8		115.4	125.2	96.39	96.4819	92.9	96.4819	92.9				96.39	78.5
2003	9		78.5	113.4	77.805	94.0669	91.8	94.0669	91.8				77.805	97.8		% DIFF=			% DIFF=
2003	10		97.8	150.1	135.607	91.1072	89.1	91.1072	89.1				135.607	82.9		6.39345			6.80584
2003	11		82.9	137.7	116.077	88.3575	86.9	88.3575	86.9				116.077	72.2
2003	12		72.2	111.4	74.655	85.1091	84.1	85.1091	84.1				74.655	60.6
2004	1		60.6	110.4	73.08	82.3266	80.1	82.3266	80.1				73.08	74.6
2004	2		74.6	104.4	63.63	80.8828	76.4	80.8828	76.4				63.63	74.8
2004	3		74.8	111	74.025	79.4522	73.2	79.4522	73.2				74.025	59.2
2004	4		59.2	101.9	59.6925	75.8888	71	148.216	140.013				149.105	140.409
2004	5		72.8	102.1	60.0075	71.1966	69.5
2004	6		66.5	100.5	57.4875	68.1909	67.1	% DIFF=					% DIFF=
2004	7		83.8	122.4	91.98	66.1762	64.8	5.85887					6.19384
2004	8		69.7	112.7	76.7025	64.8047	63
2004	9		48.8	104.1	63.1575	62.7375	60.2
2004	10		74.2	105.1	64.7325	60.2897	57.9
2004	11		70.1	111.2	74.34	59.2594	56.6
2004	12		28.9	92.1	44.2575	58.9772	55.7
2005	1		48.1	99	55.125	57.225	54.5
2005	2		43.5	94.9	48.6675	54.4228	53.2
2005	3		39.6	89	39.375	52.3294	52.3
2005	4		38.7	86.6	35.595	49.6387	49.3
2005	5		61.9	101.7	59.3775	45.9769	45
2005	6		56.8	96.6	51.345	43.9425	44.5
2005	7		62.4	99.6	56.07	42.4725	44.6
2005	8		60.5	92.8	45.36	39.9525	41.9
2005	9		37.2	92.1	44.2575	37.6884	39.4
2005	10		13.2	76.1	19.0575	36.9469	38.9
2005	11		27.5	84.4	32.13	35.8969	38.4
2005	12		59.3	87.9	37.6425	33.495	36
2006	1		20.9	80.8	26.46	30.9422	33
2006	2		5.7	74.7	16.8525	28.7962	29.7
2006	3		17.3	74.7	16.8525	27.1622	27.4
2006	4		50.3	89.6	40.32	26.1253	27
2006	5		37.2	82.7	29.4525	25.9744	27.4
2006	6		24.5	79	23.625	25.5806	26.2
2006	7		22.2	78.3	22.5225	25.1869	25
2006	8		20.8	81.4	27.405	25.2591	25.9
2006	9		23.7	78.6	22.995	25.1212	26
2006	10		14.9	73.8	15.435	23.8153	23.7
2006	11		35.7	84.4	32.13	22.2797	21.1
2006	12		22.3	81.9	28.1925	21.6431	20.2
2007	1		29.3	80.8	26.46	21.1641	19.8
2007	2		18.4	75.8	18.585	20.1928	19
2007	3		7.2	71.5	11.8125	18.795	17.7
2007	4		5.4	72.9	14.0175	17.6466	16.4
2007	5		19.5	76	18.9	16.1372	14.4
2007	6		21.3	76	18.9	14.6869	12.8
2007	7		15.1	74	15.75	13.7222	11.6
2007	8		9.8	70.9	10.8675	12.7181	9.9
2007	9		4	67.8	5.985	12.3441	9.6
2007	10		1.5	67.1	4.8825	12.2456	9.9
2007	11		2.8	68.1	6.4575	11.7009	9.2
2007	12		17.3	76.1	19.0575	10.7756	7.9
2008	1		4.1	71.9	12.4425	9.84375	6.6
2008	2		2.9	69.4	8.505	9.24656	5.6
2008	3		15.5	72.2	12.915	9.05625	5.1
2008	4		3.6	70.7	10.5525	9.10219	5.1
2008	5		4.6	69.9	9.2925	9.0825	5.4
2008	6		5.2	68	6.3	8.41969	4.8
2008	7		0.6	67.8	5.985	7.54031	4
2008	8		0.3	68	6.3	7.18594	3.8
2008	9		1.2	67.8	5.985	6.8775	3.2
2008	10		4.2	67.8	5.985	6.615	2.4
2008	11		6.6	67.1	4.8825	6.73312	2.3
2008	12		1	67	4.725	7.06125	2.2
2009	1		1.3	67.6	5.67	7.41562	2.5
2009	2		1.2	68.3	6.7725	7.65187	2.7
2009	3		0.6	68.6	7.245	7.94062	2.9
2009	4		1.2	70.3	9.9225	8.42625	3.3
2009	5		2.9	72.1	12.7575	9.01031	3.5
2009	6		6.3	70.8	10.71	9.8175	4.1
2009	7		5.5	70.4	10.08	11.0184	5.5
2009	8		0	69	7.875	12.6787	7.4
2009	9		7.1	71.2	11.34	14.5359	9.5
2009	10		7.7	71.8	12.285	15.855	10.9
2009	11		6.9	72	12.6	16.4784	11.7
2009	12		16.3	74.4	16.38	16.9575	12.7
2010	1	2010	19.5	78.5	22.8375	18.0075	14
2010	2		28.5	82.7	29.4525	19.6153	16.1
2010	3		24	82.5	29.1375	21.1378	18.5
2010	4		10.4	76.5	19.6875	22.4569	20.8
2010	5		13.9	75.4	17.955	23.6447	23.1
2010	6		18.8	74.8	17.01	24.6881	24.6
2010	7		25.2	82.4	28.98	25.3116	25.2
2010	8		29.6	81.5	27.5625	26.0925	26.4
2010	9		36.4	81.9	28.1925	28.8291	29.5
2010	10		33.6	81.2	27.09	33.3506	34.5
2010	11		34.4	80.7	26.3025	37.2422	39.1
2010	12		24.5	81.6	27.72	40.2937	42.5
2011	1		27.3	80.8	26.46	42.84	45.7
2011	2		48.3	92.3	44.5725	45.3075	48.8
2011	3		78.6	114.6	79.695	50.3475	53.8
2011	4		76.1	113.3	77.6475	57.5072	61.1
2011	5		58.2	97.9	53.3925	65.6578	69.3
2011	6		56.1	98.8	54.81	73.815	77.2
2011	7		64.5	97.2	52.29	80.5416	83.6	80.5416	83.6				52.29	65.8
2011	8		65.8	104.3	63.4725	84.4134	86.3	84.4134	86.3				63.4725	120.1
2011	9		120.1	135.9	113.243	85.1091	86.6	85.1091	86.6				113.243	125.7
2011	10		125.7	136.3	113.873	85.0763	87.4	85.0763	87.4				113.873	139.1
2011	11		139.1	149.8	135.135	86.8284	89.4	86.8284	89.4				135.135	109.3
2011	12		109.3	136.8	114.66	90.1556	92.5	90.1556	92.5				114.66	94.4
2012	1		94.4	128.1	100.957	94.4803	95.5	94.4803	95.5				100.957	47.8
2012	2		47.8	104	63	98.1094	98.1	98.1094	98.1				63	86.6
2012	3		86.6	113.5	77.9625	98.2669	98.3	98.2669	98.3				77.9625	85.9
2012	4		85.9	113.9	78.5925	96.5934	95.1	96.5934	95.1				78.5925	96.5
2012	5		96.5	124	94.5	93.6141	90.9	93.6141	90.9				94.5	92
2012	6		92	123.4	93.555	89.46	86.6	89.46	86.6				93.555	100.1
2012	7		100.1	138.5	117.337	87.045	84.5	87.045	84.5				117.337	94.8
2012	8		94.8	118.3	85.5225	86.5725	85.1	86.5725	85.1				85.5225	93.7
2012	9		93.7	124.3	94.9725	86.2116	85.3	86.2116	85.3				94.9725	76.5
2012	10		76.5	122.4	91.98	86.7825	85.8	86.7825	85.8				91.98	87.6
2012	11		87.6	118.3	85.5225	88.2459	87.7	88.2459	87.7				85.5225	56.8
2012	12		56.8	105	64.575	88.2853	88.1	88.2853	88.1				64.575	96.1
2013	1		96.1	123.1	93.0825	86.3888	86.8	86.3888	86.8				93.0825	60.9
2013	2		60.9	101.8	59.535	85.1287	86.1	85.1287	86.1				59.535	78.3
2013	3		78.3	110.2	72.765	83.7769	84.4	83.7769	84.4				72.765	107.3
2013	4		107.3	125.9	97.4925	83.0025	84.3	83.0025	84.3				97.4925	120.2
2013	5		120.2	134.3	110.723	85.3388	87	85.3388	87				110.723	76.7
2013	6		76.7	113.7	78.2775	89.5978	90.9	89.5978	90.9				78.2775	86.2
2013	7		86.2	119.3	87.0975	94.0209	94.6	94.0209	94.6				87.0975	91.8
2013	8		91.8	118.3	85.5225	100.177	99	100.177	99				85.5225	54.5
2013	9		54.5	103.7	62.5275	106.923	104.6	106.923	104.6				62.5275	114.4		106.923	104.6	2.22066	62.5275	54.5
2013	10		114.4	131.2	105.84	110.677	107	110.677	107				105.84	113.9		110.677	107	3.43604	105.84	114.4
2013	11		113.9	145.1	127.732	111.825	106.9	111.825	106.9				127.732	124.2		111.825	106.9	4.60711	127.732	113.9
2013	12		124.2	143.1	124.582	112.527	107.6	112.527	107.6				124.582	117		112.527	107.6	4.57917	124.582	124.2
2014	1		117	152.4	139.23	114.798	109.3	114.798	109.3				139.23	146.1		114.798	109.3	5.03002	139.23	117
2014	2		146.1	166.3	161.123	116.904	110.5	116.904	110.5				161.123	128.7	% DIFF=	116.904	110.5	5.79581	161.123	146.1
2014	3		128.7	148.5	133.088	120.448	114.3	120.448	114.3				133.088	112.5	25.1923	120.448	114.3	5.37894	133.088	128.7
2014	4		112.5	144.8	127.26	124.786	116.4	124.786	116.4				127.26	112.5		124.786	116.4	7.20441	127.26	112.5
2014	5		112.5	132.9	108.518	126.623	115	126.623	115				108.518	102.9		126.623	115	10.1073	108.518	112.5
2014	6		102.9	125.8	97.335	127.739	114.1	127.739	114.1				97.335	100.2		127.739	114.1	11.9536	97.335	102.9
2014	7		100.2	141.8	122.535	127.45	112.6	127.45	112.6				122.535	106.9		127.45	112.6	13.1886	122.535	100.2
2014	8		106.9	127.9	100.643	123.815	108.3	123.815	108.3				100.643	130		123.815	108.3	14.3257	100.643	106.9
2014	9		130	148.1	132.457	119.602	101.9	119.602	101.9				132.457	90		119.602	101.9	17.3715	132.457	130
2014	10		90	152.9	140.018	117.042	97.3	117.042	97.3				140.018	103.6		118.778	109.885	8.09222	118.682	112.6
2014	11		103.6	151.4	137.655	115.375	94.7	115.375	94.7				137.655	112.9
2014	12		112.9	153.8	141.435	114.719	92.2	114.719	92.2				141.435	93		% DIFF=			% DIFF=
2015	1		93	137.3	115.448	112.704	89.3	112.704	89.3				115.448	66.7		8.09359			5.40169
2015	2		66.7	126	97.65	109.364	86.1	109.364	86.1				97.65	54.5
2015	3		54.5	124.6	95.445	105.079	82.1	105.079	82.1				95.445	75.3
2015	4		75.3	129.7	103.477	98.8444	78.9	98.8444	78.9				103.477	88.8
2015	5		88.8	122.6	92.295	92.6691	76.1	92.6691	76.1				92.295	66.5
2015	6		66.5	126.1	97.8075	86.8416	72.1	86.8416	72.1				97.8075	65.8
2015	7		65.8	110.8	73.71	81.4931	68.3	81.4931	68.3				73.71	64.4
2015	8		64.4	108	69.3	77.4112	66.4	99.8259	93.5816				101.295	94.602
2015	9		78.6	102.7	60.9525	73.5394	65.9
2015	10		63.6	103.3	61.8975	68.9653	64.3	% DIFF=					% DIFF=
2015	11		62.2	106.9	67.5675	64.8309	61.2	6.67258					7.07486
2015	12		58	109.5	71.6625	60.3094	57.8
2016	1		57	100.1	56.8575	56.1422	54.4
2016	2		56.4	101	58.275	53.3334	52.5
2016	3		54.1	90.6	41.895	51.0431	50.4
2016	4		37.9	94	47.25	48.9628	47.8
2016	5		51.5	95.3	49.2975	45.8325	44.8
2016	6		20.5	84.5	32.2875	41.4553	41.5
2016	7		32.4	88.9	39.2175	37.3931	38.5
2016	8		50.2	87.1	36.3825	34.0331	36
2016	9		44.6	88.7	38.9025	31.2309	33.2
2016	10		33.4	85.6	34.02	29.2688	31.4
2016	11		21.4	76.9	20.3175	27.0834	29.9
2016	12		18.5	72.8	13.86	25.2787	28.5
2017	1		26.1	74.9	17.1675	24.2025	27.9
2017	2		26.4	75	17.325	23.1328	26.6
2017	3		17.7	73.9	15.5925	22.89	25.8
2017	4		32.3	80.8	26.46	22.47	24.9
2017	5		18.9	75.2	17.64	21.4003	23.4
2017	6		19.2	77.1	20.6325	20.7572	22.3
2017	7		17.8	79.9	25.0425
2017	8		32.6	79.8	24.885
2017	9		43.7	92.3	44.5725
2017	10		13.2	75.6	18.27
2017	11		5.7	70.6	10.395
2017	12		8.2	69.3	8.3475
2018	1			67.7
2018	2			70.2
2018	3			67.6
2018	4			70.5
2018	5			72.4
2018	6			74.7
2018	7			72.3
2018	8			70.8
2018	9			69
2018	10			69.1
2018	11			67.4
2018	12			67.8
2019	1			69.2
2019	2			68.9
2019	3			70.8
2019	4			72.9
2019	5			72.8
2019	6			70.3
2019	7			69.3
2019	8			68.7
2019	9			68.7
2019	10			67
2019	11			68.7
2019	12			68.6
				69.9
				69.3
				69.5
				70
				70.6
				71.7
				71.8
				73.4
				71.4

## Sheet: TABLE 4 TAPPING
YEAR	MONTH	YEAR	MEAN			WDC	FITTED	SMOOTHED	SMOOTHED	% DIFF	% DIFF
			SUNSPOT	FORMULA	HELP	Adjusted	FORMULA	ADJUSTED	FITTED	SMOOTHED	SMOOTHED
			NUMBER	TAPPING	FORMULA	Spaceweather	TAPPING	FLUX	ADJUSTED	FITTED	FITTED
					TAPPING
1947	3		183.8	179.222	1.96957	224.1	179.222		FLUX	ADJUSTED	ADJUSTED
1947	4		212.1	197.333	1.98222	265.84	197.333			FLUX	FLUX
1947	5		285	243.307	1.99555	267.09	243.307			AND	AND
1947	6		232.1	210.027	1.98784	224.49	210.027			SMOOTHED	SMOOTHED
1947	7		223.5	204.578	1.98569	214.01	204.578			ADJUSTED	ADJUSTED
1947	8		267.4	232.273	1.99378	237.09	232.273			FLUX	FLUX
1947	9		239.9	214.958	1.98952	194.1	214.958	201.018	193.214	TABLE 4	TABLE 4
1947	10		231.7	209.774	1.98775	207.65	209.774	194.934	193.357	SMOOTHED	SMOOTHED
1947	11		181.3	177.612	1.96809	175.76	177.612	191.115	193.831	ADJUSTED	ADJUSTED
1947	12		164.9	167.01	1.95642	170.93	167.01	188.686	192.963	FLUX	FLUX
1948	1		153.6	159.66	1.94598	145.1	159.66	186.686	192.519	ABOVE	ABOVE
1948	2		122	138.916	1.90153	131.03	138.916	183.136	190.785	115	115
1948	3		134.3	147.021	1.92205	134.15	147.021	179.448	188.657
1948	4		268.5	232.963	1.99391	209.78	232.963	176.186	186.649
1948	5		246.4	219.06	1.99074	231.5	219.06	173.534	184.38
1948	6		237.5	213.442	1.98903	201.78	213.442	173.63	183.958
1948	7		201.4	190.508	1.97822	188.72	190.508	175.393	185.18
1948	8		223.7	204.705	1.98574	177.18	204.705	179.973	189.23
1948	9		202.9	191.466	1.97883	165.49	191.466	186.288	195.259
1948	10		192.9	185.067	1.9744	157.98	185.067	188.028	196.053
1948	11		135.6	147.875	1.92395	161.77	147.875	183.647	191.9
1948	12		195.3	186.605	1.97554	187.22	186.605	178.712	187.606
1949	1		168.6	169.409	1.95938	171.12	169.409	176.092	185.256
1949	2		258	226.366	1.99257	214.94	226.366	175.2	183.348
1949	3		223	204.261	1.98555	201.8	204.261	175.662	182.135
1949	4		208.1	194.785	1.98082	183.88	194.785	176.827	182.036
1949	5		150.4	157.571	1.94259	152.27	157.571	178.236	183.683
1949	6		172.4	171.868	1.96221	162.56	171.868	177.716	184.737
1949	7		178.3	175.679	1.96621	165.06	175.679	175.537	183.296
1949	8		175.3	173.742	1.96423	179.45	173.742	171.361	179.32
1949	9		205.8	193.318	1.97996	174.3	193.318	165.51	174.204
1949	10		186.3	180.83	1.97098	177.14	180.83	162.017	171.121
1949	11		203.2	191.658	1.97895	176.42	191.658	161.593	169.85
1949	12		166.6	168.113	1.9578	160.09	168.113	160.697	168.378
1950	1	1950	143.9	153.321	1.93505	145.95	153.321	158.046	165.561
1950	2		134.3	147.021	1.92205	139.89	147.021	154.319	162.729
1950	3		155.4	160.833	1.9478	136.41	160.833	148.89	157.619
1950	4		160.6	164.217	1.95271	165.46	164.217	142.343	151.287
1950	5		150.5	157.637	1.9427	160.5	157.637	135.711	145.16
1950	6		118.3	136.472	1.89436	132.82	136.472	129.925	139.282
1950	7		128.9	143.467	1.91363	131.19	143.467	125.42	135.2
1950	8		120.6	137.991	1.89888	123.87	137.991	121.816	132.219
1950	9		72.7	106.412	1.74875	99.58	106.412	118.673	128.768
1950	10		87	115.776	1.80853	94.72	115.776	115.424	125.893
1950	11		77.7	109.671	1.77152	99.68	109.671	114.127	125.192
1950	12		76.7	109.017	1.76714	97.96	109.017	116.043	125.94
1951	1		85	114.459	1.80111	99.97	114.459	117.003	125.453
1951	2		84.8	114.328	1.80035	99.38	114.328	116.07	123.365
1951	3		79.3	110.717	1.77836	101.48	110.717	116.408	123.662
1951	4		131.7	145.31	1.9181	122.41	145.31	117.658	124.524
1951	5		153.7	159.725	1.94608	172.43	159.725	118.196	124.055
1951	6		142.4	152.338	1.93317	166.87	152.338	118.18	123.644
1951	7		87.2	115.908	1.80925	120.18	115.908	117.581	122.597
1951	8		86.5	115.447	1.8067	112.5	115.447	116.46	120.506
1951	9		117.7	136.075	1.89315	119.05	136.075	114.69	117.913
1951	10		73.3	106.802	1.7516	105.26	106.802	111.977	114.252
1951	11		74.2	107.387	1.75581	102.04	107.387	106.66	108.598
1951	12		65	101.44	1.70917	95.22	101.44	99.4933	102.91
1952	1		57.9	96.9239	1.66716	88.33	96.9239	94.88	99.6098
1952	2		32.4	81.6611	1.45968	84.12	81.6611	92.9854	98.5337
1952	3		31.5	81.1628	1.45036	74.25	81.1628	90.6192	96.2191
1952	4		41.7	87.0006	1.5472	84.54	87.0006	87.9996	93.1369
1952	5		33.6	82.3309	1.47186	82.68	82.3309	86.1817	91.0456
1952	6		52	93.2382	1.62768	84.63	93.2382	84.8154	89.5386
1952	7		56.1	95.7922	1.65558	91.7	95.7922	83.8338	88.6114
1952	8		77.8	109.736	1.77195	95.51	109.736	82.6754	87.5788
1952	9		40.4	86.2353	1.53587	79.25	86.2353	81.6542	86.6983
1952	10		34.2	82.6682	1.47785	82.19	82.6682	81.1938	86.2929
1952	11		31.8	81.3285	1.45349	81.48	81.3285	80.7108	85.9085
1952	12		48.9	91.3316	1.60509	82.99	91.3316	79.9646	85.0724
1953	1		37.9	84.7797	1.5133	77	84.7797	78.7587	83.5688
1953	2		5.9	69.023	1.10605	67.65	69.023	77.0592	81.4264
1953	3		14.7	72.6675	1.24369	66.21	72.6675	76.0017	79.994
1953	4		39.6	85.7671	1.52877	81.53	85.7671	75.3775	79.2425
1953	5		18.3	74.3391	1.29369	74.1	74.3391	74.3333	78.2184
1953	6		31.5	81.1628	1.45036	75.3	81.1628	73.1358	76.6954
1953	7		12.7	71.7811	1.21439	72.09	71.7811	71.9742	74.9999
1953	8		33.6	82.3309	1.47186	74.33	82.3309	71.4062	74.1905
1953	9		28	79.2611	1.41257	75.05	79.2611	71.6017	74.1376
1953	10		12.3	71.6076	1.2084	71.41	71.6076	71.2921	73.4131
1953	11		2.5	67.811	1.04639	67.2	67.811	70.4758	72.3778
1953	12		3.9	68.2953	1.07142	68.53	68.2953	69.9288	71.5029
1954	1		0.4	67.1249	1.00757	63.58	67.1249	69.5954	70.8253
1954	2		0.8	67.2517	1.01509	67.44	67.2517	69.3925	70.2912
1954	3		15.8	73.1682	1.25933	71.11	73.1682	69.1025	69.3699
1954	4		2.7	67.8789	1.05001	69.2	67.8789	68.9779	68.8582
1954	5		1.2	67.3804	1.02254	66.84	67.3804	69.1863	69.0045
1954	6		0.4	67.1249	1.00757	69.43	67.1249	69.5329	69.3029
1954	7		7.3	69.5561	1.12951	69.96	69.5561	70.35	70.052
1954	8		12.6	71.7376	1.2129	71.59	71.7376	71.4992	71.224
1954	9		2.3	67.7435	1.04276	70.83	67.7435	72.0167	71.6166
1954	10		10.5	70.8437	1.18086	72.64	70.8437	72.3712	71.6981
1954	11		13.4	72.0877	1.22477	70.97	72.0877	73.4708	72.7377
1954	12		11.3	71.1798	1.19322	73.08	71.1798	75.1375	74.4605
1955	1		33.4	82.2189	1.46985	78.64	82.2189	76.905	76.0171
1955	2		29.9	80.2862	1.4334	79.96	80.2862	78.635	77.7107
1955	3		7.3	69.5561	1.12951	71.01	69.5561	80.5758	80.0551
1955	4		16.4	73.4451	1.26773	77.81	73.4451	83.2258	83.1099
1955	5		41.3	86.7645	1.54374	84.62	86.7645	87.165	87.7752
1955	6		45.2	89.0875	1.57633	91.65	89.0875	91.8942	93.1366
1955	7		38.2	84.9532	1.51606	90.16	84.9532	96.5154	97.4643
1955	8		58	96.9869	1.66779	92.91	96.9869	102.221	103.235
1955	9		60.8	98.759	1.68501	96.09	98.759	109.363	111.274
1955	10		83	113.144	1.79341	110.98	113.144	116.5	119.086	119.086	116.5
1955	11		126.3	141.753	1.90925	127.17	141.753	123.404	126.872	126.872	123.404
1955	12		108.8	130.188	1.87346	130.38	130.188	129.642	134.234	134.234	129.642
1956	1		104.1	127.077	1.86164	132.25	127.077	135.452	141.384	141.384	135.452
1956	2		175.6	173.936	1.96444	163.28	173.936	142.86	150.206	150.206	142.86
1956	3		167.7	168.826	1.95868	159.09	168.826	151.714	160.116	160.116	151.714
1956	4		156.7	161.68	1.94907	161.04	161.68	159.886	168.816	168.816	159.886
1956	5		193.4	185.388	1.97464	167.08	185.388	168.51	176.762	176.762	168.51
1956	6		165.1	167.14	1.95658	158.91	167.14	178.222	185.368	185.368	178.222
1956	7		182.7	178.514	1.96892	162.32	178.514	186.546	193.24	193.24	186.546
1956	8		240.2	215.148	1.98958	198.54	215.148	190.853	196.977	196.977	190.853
1956	9		245.4	218.43	1.99056	202.97	218.43	193.176	198.688	198.688	193.176
1956	10		219.9	202.293	1.98467	200.23	202.293	196.393	202.592	202.592	196.393
1956	11		285	243.307	1.99555	244.89	243.307	200	206.075	206.075	200
1956	12		272	235.16	1.9943	245.76	235.16	206.142	210.281	210.281	206.142
1957	1		233.7	211.04	1.98821	216.64	211.04	212.978	215.616	215.616	212.978
1957	2		184.5	179.672	1.96997	182.26	179.672	215.958	217.36	217.36	215.958
1957	3		222.8	204.134	1.98549	195.86	204.134	219.106	219.236	219.236	219.106
1957	4		248	220.069	1.99101	201.46	220.069	225.261	225.19	225.19	225.261
1957	5		233	210.597	1.98805	213.23	210.597	228.988	229.187	229.187	228.988
1957	6		284.3	242.869	1.99549	260.18	242.869	230.669	231.285	231.285	230.669
1957	7		265.1	230.828	1.99351	225.12	230.828	233.109	234.418	234.418	233.109
1957	8		223.7	204.705	1.98574	207.25	204.705	235.259	237.111	237.111	235.259
1957	9		334	273.898	1.99825	269.82	273.898	238.515	239.656	239.656	238.515
1957	10		359.4	289.707	1.99892	281.09	289.707	242.657	241.671	241.671	242.657
1957	11		298.6	251.814	1.99656	253.48	251.814	245.003	242.846	242.846	245.003
1957	12		339	277.012	1.99841	277.51	277.012	244.065	242.162	242.162	244.065
1958	1		286.7	244.371	1.99569	243.45	244.371	242.96	241.232	241.232	242.96
1958	2		233.6	210.976	1.98819	207.06	210.976	244.702	242.956	242.956	244.702
1958	3		270	233.905	1.99408	249.19	233.905	245.197	243.253	243.253	245.197
1958	4		277.6	238.671	1.99488	247.54	238.671	241.933	239.313	239.313	241.933
1958	5		248.2	220.195	1.99105	223.46	220.195	237.618	234.468	234.468	237.618
1958	6		242.9	216.852	1.9901	227.44	216.852	233.634	230.382	230.382	233.634
1958	7		271	234.532	1.99419	231.35	234.532	232.617	229.02	229.02	232.617
1958	8		283.5	242.368	1.99542	242.81	242.368	233.372	228.746	228.746	233.372
1958	9		285.1	243.37	1.99556	246.15	243.37	232.274	227.742	227.742	232.274
1958	10		256.9	225.674	1.99241	226.42	225.674	229.869	226.345	226.345	229.869
1958	11		215.6	199.56	1.98337	204.58	199.56	228.139	225.009	225.009	228.139
1958	12		265.7	231.205	1.99358	230.81	231.205	227.761	224.783	224.783	227.761
1959	1		307.7	257.498	1.99711	265.73	257.498	226.729	223.122	223.122	226.729
1959	2		202.6	191.275	1.97871	202.91	191.275	225.705	221.544	221.544	225.705
1959	3		263	229.509	1.99324	226.98	229.509	223.518	219.429	219.429	223.518
1959	4		231.3	209.521	1.98766	212.03	209.521	218.856	214.699	214.699	218.856
1959	5		243.6	217.294	1.99023	217.45	217.294	215.267	210.992	210.992	215.267
1959	6		238.9	214.327	1.98932	224.38	214.327	212.012	207.579	207.579	212.012
1959	7		211.9	197.206	1.98216	209.64	197.206	206.586	202.596	202.596	206.586
1959	8		282.6	241.804	1.99534	239.95	241.804	201.912	198.541	198.541	201.912
1959	9		205.6	193.19	1.97989	196.53	193.19	197	193.968	193.968	197
1959	10		157.7	162.331	1.95003	164.14	162.331	191.798	189.252	189.252	191.798
1959	11		175.6	173.936	1.96444	180.73	173.936	187.87	185.714	185.714	187.87
1959	12		177.1	174.904	1.96543	176.54	174.904	183.352	181.525	181.525	183.352
1960	1	1960	207.2	194.211	1.98049	189.78	194.211	179.281	178.257	178.257	179.281
1960	2		149.9	157.245	1.94205	166.67	157.245	175.048	174.76	174.76	175.048
1960	3		144.6	153.779	1.93591	145.35	153.779	171.232	171.637	171.637	171.232
1960	4		172.7	172.062	1.96242	168.81	172.062	169.017	169.851	169.851	169.017
1960	5		169.3	169.862	1.95991	166.39	169.862	166.603	167.421	167.421	166.603
1960	6		156	161.224	1.94839	167.01	161.224	163.358	164.575	164.575	163.358
1960	7		172.4	171.868	1.96221	169.3	171.868	158.587	159.651	159.651	158.587
1960	8		190	183.207	1.97295	178.7	183.207	152.979	153.934	153.934	152.979
1960	9		180.1	176.839	1.96735	166.19	176.839	148.627	149.714	149.714	148.627
1960	10		117.3	135.811	1.89233	141.32	135.811	144.27	145.46	145.46	144.27
1960	11		126.9	142.149	1.91028	145.63	142.149	138.942	140.458	140.458	138.942
1960	12		121.2	138.388	1.90002	133.76	138.388	134.009	136.529	136.529	134.009
1961	1		82.1	112.553	1.78984	118.05	112.553	129.733	133.257	133.257	129.733
1961	2		65.4	101.696	1.71137	103.8	101.696	124.779	128.235	128.235	124.779
1961	3		75.2	108.039	1.7604	103.79	108.039	119.692	122.752	122.752	119.692
1961	4		86.9	115.71	1.80816	105.79	115.71	115.627	118.563	118.563	115.627
1961	5		72.3	106.152	1.74683	101.55	106.152	111.351	114.655	194.085	193.483
1961	6		109.5	130.651	1.87513	113.44	130.651	107.214	110.723
1961	7		99.3	123.9	1.84843	120.25	123.9	104.249	108.245	% DIFF=
1961	8		79.2	110.652	1.77794	108.86	110.652	102.862	107.69	0.311397
1961	9		90.1	117.82	1.81948	113.94	117.82	102.509	107.582
1961	10		53.7	94.293	1.63951	96.02	94.293	101.952	106.733	Standard	Standard
1961	11		46.5	89.8718	1.58667	88.29	89.8718	101.517	105.884	deviation	deviation
1961	12		56.9	96.2945	1.66078	91.82	96.2945	100.638	104.245	4.66593	4.92478
1962	1		55.1	95.1662	1.64898	88.82	95.1662	98.1621	101.101
1962	2		71.7	105.762	1.74393	99.76	105.762	95.2667	98.0893	0.95	0.95
1962	3		64.9	101.376	1.70861	99.34	101.376	93.0504	96.3853	under	under
1962	4		65.9	102.017	1.7141	96.87	102.017	91.7017	95.9724	184.753	183.633
1962	5		61.9	99.4586	1.69152	100.04	99.4586	91.1112	95.8444	upper	upper
1962	6		59.6	97.9979	1.67774	93.85	97.9979	90.3725	95.0628	203.417	203.332
1962	7		31.4	81.1077	1.44932	80.42	81.1077	89.2546	93.8246
1962	8		31.5	81.1628	1.45036	79.2	81.1628	87.735	92.2389
1962	9		72.7	106.412	1.74875	90.41	106.412	85.8867	90.3085
1962	10		56.1	95.7922	1.65558	87.18	95.7922	84.2513	88.6912
1962	11		38.8	85.3012	1.52155	82.96	85.3012	83.1142	88.0443
1962	12		33.2	82.1069	1.46783	79.42	82.1069	82.3621	87.8042
1963	1		28.7	79.6367	1.42033	74.39	79.6367	81.9579	87.524
1963	2		35.2	83.2335	1.48768	77.72	83.2335	82.0283	87.8509
1963	3		24.8	77.5767	1.37575	77.02	77.5767	81.9979	87.773
1963	4		41.7	87.0006	1.5472	79.94	87.0006	81.7004	87.1519
1963	5		61.1	98.9496	1.6868	89.68	98.9496	81.4579	86.8752
1963	6		51.2	92.744	1.62198	86.16	92.744	81.1842	86.4973
1963	7		28.7	79.6367	1.42033	78.41	79.6367	80.8833	86.108
1963	8		47.5	90.4782	1.59445	82.9	90.4782	80.61	85.7504
1963	9		55.2	95.2287	1.64964	85.98	95.2287	80.4129	85.5105
1963	10		50.1	92.0669	1.61399	84.47	92.0669	80.0475	84.865
1963	11		33.7	82.387	1.47287	79.85	82.387	78.985	83.1319
1963	12		21.6	75.95	1.33662	75.96	75.95	77.5863	81.1704
1964	1		22.6	76.4518	1.3491	70.63	76.4518	76.5821	79.8525
1964	2		25.3	77.8363	1.38165	74.92	77.8363	75.7033	78.6344
1964	3		24.1	77.2158	1.36739	75.09	77.2158	74.5775	76.801
1964	4		12.9	71.8683	1.21737	73.1	71.8683	73.4617	74.82
1964	5		14.3	72.4877	1.23792	71.02	72.4877	72.6513	73.4429
1964	6		13.5	72.1318	1.22625	71.25	72.1318	72.3413	72.9828
1964	7		4.8	68.6177	1.08716	69.22	68.6177	72.5817	73.0531
1964	8		13.8	72.2647	1.23064	71	72.2647	72.7425	73.0178
1964	9		7	69.4402	1.12453	70.86	69.4402	72.605	72.787
1964	10		9.2	70.3094	1.16038	72.81	70.3094	72.5079	72.6035
1964	11		11.1	71.0953	1.19014	72.06	71.0953	72.8542	72.9868
1964	12		22.1	76.2001	1.34289	76.31	76.2001	73.565	73.6128
1965	1		25.4	77.8884	1.38282	76.05	77.8884	74.22	74.0263
1965	2		20.8	75.553	1.32645	73.36	75.553	74.7662	74.2357
1965	3		17.5	73.9596	1.28287	73.35	73.9596	75.2662	74.5591
1965	4		10.2	70.7191	1.17618	72.51	70.7191	75.8192	75.2893
1965	5		34.5	82.8373	1.48082	79.92	82.8373	76.265	75.9143
1965	6		23.3	76.8067	1.3577	79.41	76.8067	76.3846	76.1969
1965	7		17.3	73.8654	1.28014	76.78	73.8654	76.7187	76.5974
1965	8		13.3	72.0437	1.2233	76.55	72.0437	77.4629	77.2652
1965	9		24.5	77.4217	1.37218	77.31	77.4217	78.5004	78.0025
1965	10		29.1	79.8524	1.42472	79.63	79.8524	80.2254	79.8047
1965	11		22.8	76.5529	1.35157	75.94	76.5529	82.1488	81.9457
1965	12		24.7	77.525	1.37456	75.3	77.525	83.8475	83.7982
1966	1		40.3	86.1767	1.53499	85.08	86.1767	86.0679	86.4569
1966	2		35.3	83.2903	1.48865	82.19	83.2903	88.8183	89.4463
1966	3		36.4	83.9173	1.49923	89.42	83.9173	91.6254	92.0402
1966	4		69	104.014	1.73045	97.84	104.014	94.2479	94.5428
1966	5		64.2	100.927	1.70471	100.75	100.927	96.8779	97.3507
1966	6		67.7	103.175	1.72371	99.35	103.175	100.223	100.767
1966	7		80.2	111.307	1.78212	110.13	111.307	104.529	105.867
1966	8		72.6	106.347	1.74827	109.21	106.347	109.498	111.63
1966	9		71.1	105.373	1.74099	112.02	105.373	114.95	117.522
1966	10		81.2	111.963	1.78622	107.86	111.963	119.219	121.609	121.609	119.219
1966	11		81	111.832	1.7854	110.83	111.832	122.487	124.01	124.01	122.487
1966	12		99.8	124.231	1.84986	120.69	124.231	125.41	126.363	126.363	125.41
1967	1		157	161.875	1.94936	143.04	161.875	127.885	128.475	128.475	127.885
1967	2		132.6	145.903	1.91949	143.49	145.903	131.347	132.004	132.004	131.347
1967	3		158.3	162.722	1.95059	158.95	162.722	134.257	135.208	135.208	134.257
1967	4		98.4	123.305	1.84581	130.78	123.305	136.289	137.444	137.444	136.289
1967	5		122.5	139.246	1.90246	146.24	139.246	138.729	140.097	140.097	138.729
1967	6		95.4	121.321	1.83677	124.01	121.321	141.584	143.706	143.706	141.584
1967	7		129.5	143.862	1.91461	144.88	143.862	144.804	146.288	146.288	144.804
1967	8		151.8	158.485	1.9441	157.55	158.485	147.533	147.413	147.413	147.533
1967	9		108.7	130.122	1.87322	133.5	130.122	147.857	147.361	147.361	147.857
1967	10		125	140.896	1.90699	135.15	140.896	147.105	147.06	147.06	147.105
1967	11		133.6	146.56	1.92101	142.1	146.56	147.597	149.082	149.082	147.597
1967	12		179	176.13	1.96666	157.94	176.13	149.054	152.314	152.314	149.054
1968	1		172.5	171.933	1.96228	183.07	171.933	149.869	154.165	154.165	149.869
1968	2		158.5	162.852	1.95078	168.96	162.852	149.24	154.43	154.43	149.24
1968	3		130.5	144.52	1.91621	141.26	144.52	149.116	156.079	156.079	149.116
1968	4		115	134.29	1.88752	130.42	134.29	150.161	158.397	158.397	150.161
1968	5		180	176.775	1.96729	158.41	176.775	150.561	158.823	158.823	150.561
1968	6		156.2	161.354	1.94858	146.81	161.354	149.696	157.861	157.861	149.696
1968	7		136.2	148.27	1.92481	141.63	148.27	147.636	156.557	156.557	147.636
1968	8		154.8	160.442	1.9472	145.7	160.442	145.44	156.213	156.213	145.44
1968	9		166	167.724	1.95732	142.38	167.724	145.94	158.21	158.21	145.94
1968	10		152.5	158.942	1.94484	151.36	158.942	148.253	160.873	160.873	148.253
1968	11		121.7	138.718	1.90097	135.49	138.718	148.938	161.59	161.59	148.938
1968	12		155.5	160.898	1.9479	143.79	160.898	149.387	161.153	161.153	149.387
1969	1		147.8	155.873	1.93969	147.77	155.873	150.217	161.011	161.011	150.217
1969	2		170.5	170.639	1.96082	151.56	170.639	150.23	160.6	160.6	150.23
1969	3		192.3	184.682	1.9741	170.65	184.682	150.113	159.164	159.164	150.113
1969	4		151.1	158.029	1.94335	156.56	158.029	150.025	157.698	157.698	150.025
1969	5		169.9	170.251	1.96037	148.71	170.251	150.825	157.525	157.525	150.825
1969	6		150.1	157.376	1.94227	167.28	157.376	151.367	157.359	157.359	151.367
1969	7		137.1	148.861	1.92609	141.07	148.861	151.401	157.173	157.173	151.401
1969	8		138.8	149.977	1.92844	146.57	149.977	152.451	157.724	157.724	152.451
1969	9		129.3	143.73	1.91428	138.72	143.73	152.694	156.744	156.744	152.694
1969	10		135.4	147.744	1.92366	152.89	147.744	152.386	155.595	155.595	152.386
1969	11		132.4	145.771	1.91919	153.17	145.771	153.633	155.989	155.989	153.633
1969	12		138.6	149.846	1.92817	139.13	149.846	154.301	156.307	156.307	154.301
1970	1	1970	157.9	162.461	1.95022	153.24	162.461	154.654	156.944	156.944	154.654
1970	2		180.8	177.29	1.96778	171.28	177.29	155.11	157.354	157.354	155.11
1970	3		145.7	154.499	1.93723	156.76	154.499	155.155	157.475	157.475	155.155
1970	4		155.1	160.638	1.9475	163.06	160.638	155.172	157.438	157.438	155.172
1970	5		180.5	177.097	1.9676	172.15	177.097	155.158	157.153	157.153	155.158
1970	6		151.3	158.159	1.94357	159.86	158.159	155.749	156.659	156.659	155.749
1970	7		159.3	163.372	1.95152	156.96	163.372	156.292	155.315	155.315	156.292
1970	8		131.7	145.31	1.9181	141.62	145.31	154.932	152.652	152.652	154.932
1970	9		140.8	151.289	1.93111	144.76	151.289	151.481	149.129	149.129	151.481
1970	10		122.6	139.312	1.90265	147.25	139.312	147.666	146.018	146.018	147.666
1970	11		134.8	147.349	1.92279	158.49	147.349	143.274	141.845	141.845	143.274
1970	12		118.2	136.406	1.89416	147.99	136.406	138.491	136.929	136.929	138.491
1971	1		129.2	143.664	1.91412	157.41	143.664	134.71	133.499	133.499	134.71
1971	2		111.8	132.173	1.88047	134.46	132.173	132.189	131.048	131.048	132.189
1971	3		85.9	115.052	1.80448	110.77	115.052	129.508	127.91	127.91	129.508
1971	4		101.6	125.422	1.85491	117.48	125.422	126.157	124.65	124.65	126.157
1971	5		81.5	112.16	1.78743	112.33	112.16	122.5	122.051	122.051	122.5
1971	6		70.7	105.114	1.73902	104.88	105.114	119.403	120.757	120.757	119.403
1971	7		114.7	134.092	1.88688	121.19	134.092	116.335	119.549	119.549	116.335
1971	8		87	115.776	1.80853	116.9	115.776	114.572	118.758	118.758	114.572
1971	9		71.3	105.503	1.74198	105.13	105.503	115.422	119.89	119.89	115.422
1971	10		73.4	106.867	1.75207	106.46	106.867	115.948	120.32	120.32	115.948
1971	11		89.5	117.424	1.81741	111.51	117.424	116.633	120.881	120.881	116.633
1971	12		116.5	135.282	1.89068	120.64	135.282	118.926	123.256	123.256	118.926
1972	1		87	115.776	1.80853	111.12	115.776	120.579	124.562	124.562	120.579
1972	2		125.3	141.094	1.90751	138.45	141.094	121.276	124.989	124.989	121.276
1972	3		113.5	133.298	1.88427	127.17	133.298	122.177	126.122	126.122	122.177
1972	4		89.6	117.49	1.81775	113.71	117.49	123.154	127.02	127.02	123.154
1972	5		113.9	133.563	1.88515	132.53	133.563	123.222	126.568	126.568	123.222
1972	6		124.7	140.698	1.90645	139.73	140.698	121.843	124.32	124.32	121.843
1972	7		108.3	129.857	1.87225	126	129.857	120.463	122.208	122.208	120.463
1972	8		108.9	130.254	1.8737	128.83	130.254	118.2	119.765	119.765	118.2
1972	9		90.7	118.216	1.82152	114.83	118.216	115.285	116.687	116.687	115.285
1972	10		86.9	115.71	1.80816	120.2	115.71	113.797	115.156	142.853	139.398
1972	11		59.2	97.7448	1.67528	99.39	97.7448	112.075	113.479
1972	12		64.3	100.991	1.70527	99.67	100.991	108.785	110.144	% DIFF=
1973	1		61.8	99.3949	1.69093	98.96	99.3949	105.27	106.283	2.47815
1973	2		60.9	98.8225	1.6856	96.3	98.8225	101.826	102.368	Standard	Standard
1973	3		65.4	101.696	1.71137	99.38	101.696	99.6604	100.261	deviation	deviation
1973	4		81.8	112.356	1.78864	105.77	112.356	97.9467	98.9329	1.81787	1.66038
1973	5		60.3	98.4416	1.682	99.15	98.4416	95.7492	97.1604
1973	6		56.1	95.7922	1.65558	94.15	95.7922	94.1737	95.75	0.95	0.95
1973	7		33.2	82.1069	1.46783	87.23	82.1069	92.6467	94.3928	under	under
1973	8		36.6	84.0318	1.50113	84.93	84.0318	91.15	93.2206	139.217	136.077
1973	9		84.1	113.867	1.79768	106.76	113.867	89.5517	91.7517	upper	upper
1973	10		43.7	88.1886	1.56408	87.14	88.1886	87.8833	90.2289	146.488	142.719
1973	11		34.3	82.7245	1.47884	79.71	82.7245	86.8146	89.4702
1973	12		33.3	82.1629	1.46884	81.54	82.1629	86.3254	89.2458
1974	1		39.4	85.6504	1.52697	80.44	85.6504	86.455	90.3131
1974	2		37.3	84.4337	1.50772	78.9	84.4337	86.8063	91.7785
1974	3		30.9	80.8327	1.44406	78.42	80.8327	86.0604	91.3329
1974	4		57.5	96.6719	1.66462	86.69	96.6719	85.7221	91.2196
1974	5		56.3	95.9177	1.65689	92.58	95.9177	86.4942	91.8684
1974	6		51.5	92.9292	1.62413	88.98	92.9292	86.7292	91.8212
1974	7		79.1	110.586	1.77752	95.51	110.586	86.38	91.4545
1974	8		47.9	90.7215	1.59752	85.08	90.7215	85.8825	90.7207
1974	9		57.2	96.4831	1.66271	88.71	96.4831	85.3283	89.9705
1974	10		67.2	102.853	1.72107	97.07	102.853	84.4017	88.549
1974	11		35.9	83.6317	1.49445	88.31	83.6317	82.8838	86.4273
1974	12		29.6	80.1231	1.43016	78.58	80.1231	81.2987	84.6229
1975	1		27.3	78.888	1.40471	75.02	78.888	79.9292	82.8022
1975	2		16.7	73.5846	1.27189	72.38	73.5846	79.5879	82.0145
1975	3		16.9	73.6779	1.27465	71.64	73.6779	79.56	81.3592
1975	4		7.7	69.7119	1.1361	71.23	69.7119	78.3067	79.1986
1975	5		13.1	71.9558	1.22034	71.61	71.9558	77.0138	77.736
1975	6		16.7	73.5846	1.27189	71.91	73.5846	76.3667	77.1844
1975	7		40.4	86.2353	1.53587	79.71	86.2353	75.9929	76.5065
1975	8		56.7	96.1688	1.65949	92.69	96.1688	75.735	76.0138
1975	9		20.3	75.3069	1.32003	80.43	75.3069	75.7679	76.1434
1975	10		13.6	72.176	1.22771	75.27	72.176	76.1812	76.8377
1975	11		27.9	79.2077	1.41145	79.08	79.2077	76.4404	77.3173
1975	12		11.6	71.3073	1.1978	72.28	71.3073	76.5033	77.4381
1976	1		11.9	71.4355	1.20236	72.35	71.4355	76.1263	76.6996
1976	2		6.4	69.2112	1.1145	68.86	69.2112	75.0421	75.1479
1976	3		31.5	81.1628	1.45036	75.95	81.1628	74.0983	74.3521
1976	4		27.3	78.888	1.40471	76.84	78.888	73.8292	74.6794
1976	5		18.2	74.2914	1.29235	72.22	74.2914	73.5087	74.6204
1976	6		17.9	74.1488	1.2883	72.81	74.1488	73.2683	74.436
1976	7		2.9	67.9472	1.05361	69.76	67.9472	73.4621	74.8785
1976	8		24.1	77.2158	1.36739	76.62	77.2158	74.0479	75.6526
1976	9		20	75.1601	1.31614	73.85	75.1601	74.5183	75.8068
1976	10		29.7	80.1774	1.43124	75.39	80.1774	74.5671	75.2458
1976	11		7.9	69.7903	1.13938	71.27	69.7903	75.0062	75.2552
1976	12		22.3	76.3006	1.34538	74.32	76.3006	76.2912	76.3106
1977	1		23.8	77.0619	1.36377	74.96	77.0619	77.7733	77.7111
1977	2		33.3	82.1629	1.46884	80.31	82.1629	78.7592	78.681
1977	3		13	71.912	1.21886	75.79	71.912	80.3046	80.1465
1977	4		19	74.6748	1.30302	78.17	74.6748	82.3163	81.9809
1977	5		27	78.7289	1.4013	81.43	78.7289	84.0367	83.5043
1977	6		54.9	95.0412	1.64764	94.44	95.0412	85.91	85.1705
1977	7		30.6	80.6682	1.44088	83.7	80.6682	88.2317	87.3722
1977	8		43	87.7714	1.55825	86.34	87.7714	92.0958	91.278
1977	9		62.4	99.7772	1.69444	101.22	99.7772	97.3492	96.351
1977	10		62.1	99.586	1.69269	96.3	99.586	103.049	101.971
1977	11		41.6	86.9416	1.54634	91.65	86.9416	108.908	107.547
1977	12		61.4	99.1404	1.68858	98.9	99.1404	113.932	112.094
1978	1		73.7	107.062	1.75348	106.1	107.062	118.264	116.081	116.081	118.264
1978	2		132.6	145.903	1.91949	141.91	145.903	121.69	118.934	118.934	121.69
1978	3		108.4	129.923	1.8725	140.27	129.923	125.395	123.603	123.603	125.395
1978	4		141.2	151.551	1.93163	150.48	151.551	130.363	130.37	130.37	130.363
1978	5		117.1	135.679	1.89192	149.73	135.679	135.258	136.126	136.126	135.258
1978	6		134.6	147.218	1.92249	146.73	147.218	140.581	141.815	141.815	140.581
1978	7		99.7	124.165	1.84958	135.38	124.165	147.313	149.277	149.277	147.313
1978	8		82.4	112.75	1.79104	116.89	112.75	153.467	155.347	155.347	153.467
1978	9		195.7	186.861	1.97572	159.59	186.861	157.672	159.389	159.389	157.672
1978	10		177.1	174.904	1.96543	157.15	174.904	160.512	161.819	161.819	160.512
1978	11		138.5	149.78	1.92803	148.27	149.78	162.328	163.875	163.875	162.328
1978	12		173.9	172.838	1.96327	170.04	172.838	164.758	167.941	167.941	164.758
1979	1		235.9	212.431	1.98869	196.53	212.431	167.893	173.427	173.427	167.893
1979	2		194.7	186.221	1.97526	199.17	186.221	171.896	180.076	180.076	171.896
1979	3		195.3	186.605	1.97554	183.95	186.605	176.178	185.195	185.195	176.178
1979	4		143.7	153.19	1.9348	174.95	153.19	180.429	189.365	189.365	180.429
1979	5		190.3	183.399	1.9731	168.83	183.399	186.175	194.886	194.886	186.175
1979	6		211.7	197.079	1.98209	185.96	197.079	190.583	200.126	200.126	190.583
1979	7		225.7	205.973	1.98627	171.39	205.973	191.841	201.878	201.878	191.841
1979	8		201.4	190.508	1.97822	176.96	190.508	191.798	202.276	202.276	191.798
1979	9		266.9	231.959	1.99372	202.29	231.959	190.899	202.488	202.488	190.899
1979	10		263.6	229.886	1.99332	216.47	229.886	191.607	204.414	204.414	191.607
1979	11		259.5	227.309	1.99278	226.86	227.309	195.556	208.489	208.489	195.556
1979	12		249.6	221.077	1.99128	197.22	221.077	198.626	210.484	210.484	198.626
1980	1	1980	226.1	206.227	1.98638	199.56	206.227	199.992	209.904	209.904	199.992
1980	2		219.4	201.976	1.98453	195.09	201.976	200.523	208.774	208.774	200.523
1980	3		178.7	175.937	1.96647	166.47	175.937	199.558	207.271	207.271	199.558
1980	4		232.2	210.091	1.98787	209.41	210.091	198.304	205.232	205.232	198.304
1980	5		254.7	224.289	1.99209	229.15	224.289	197.175	203.118	203.118	197.175
1980	6		222.7	204.071	1.98547	199.32	204.071	197.575	201.729	201.729	197.575
1980	7		192.9	185.067	1.9744	190.82	185.067	197.265	199.799	199.799	197.265
1980	8		191.7	184.297	1.97381	170.28	184.297	196.183	197.156	197.156	196.183
1980	9		219.6	202.103	1.98458	185.81	202.103	197.905	196.85	196.85	197.905
1980	10		233.3	210.787	1.98812	202.84	210.787	200.075	197.147	197.147	200.075
1980	11		209.5	195.677	1.98132	213.39	195.677	199.455	195.379	195.379	199.455
1980	12		246.9	219.376	1.99082	220.31	219.376	196.635	191.342	191.342	196.635
1981	1		156.6	161.615	1.94897	169.03	161.615	195.381	189.221	189.221	195.381
1981	2		189.9	183.142	1.9729	199.65	183.142	198.007	190.897	190.897	198.007
1981	3		196.6	187.438	1.97614	203.22	187.438	201.829	192.921	192.921	201.829
1981	4		225.3	205.72	1.98617	224.74	205.72	204.165	193.147	193.147	204.165
1981	5		194.7	186.221	1.97526	198.94	186.221	204.578	192.068	192.068	204.578
1981	6		131.6	145.245	1.91795	161.86	145.245	203.369	190.079	190.079	203.369
1981	7		205.3	192.999	1.97977	198.18	192.999	202.76	188.531	188.531	202.76
1981	8		242.5	216.6	1.99002	225.94	216.6	203.33	189.435	189.435	203.33
1981	9		245.3	218.367	1.99054	221.89	218.367	203.932	191.174	191.174	203.932
1981	10		216.2	199.942	1.98356	222.81	199.942	201.569	190.358	190.358	201.569
1981	11		186	180.637	1.97081	203.33	180.637	196.867	186.846	186.846	196.867
1981	12		195.4	186.669	1.97559	201.36	186.669	195.385	185.675	185.675	195.385
1982	1		149.8	157.18	1.94194	173.37	157.18	194.64	184.773	184.773	194.64
1982	2		230.9	209.268	1.98756	209	209.268	191.005	180.849	180.849	191.005
1982	3		221.1	203.055	1.98502	208.3	203.055	186.474	176.63	176.63	186.474
1982	4		170.3	170.51	1.96067	162.95	170.51	181.607	172.352	172.352	181.607
1982	5		119.3	137.133	1.89635	147.89	137.133	177.374	168.56	168.56	177.374
1982	6		163.7	166.231	1.95541	177.35	166.231	175.38	166.264	166.264	175.38
1982	7		139.4	150.371	1.92925	164.81	150.371	173.555	164.616	164.616	173.555
1982	8		161.9	165.062	1.95386	172.06	165.062	168.347	159.401	159.401	168.347
1982	9		167.4	168.631	1.95844	167.03	168.631	160.831	151.537	151.537	160.831
1982	10		134.3	147.021	1.92205	160.86	147.021	155.243	146.289	146.289	155.243
1982	11		127.5	142.544	1.9113	163.68	142.544	153.123	144.993	144.993	153.123
1982	12		169	169.668	1.95968	193.17	169.668	151.368	144.479	144.479	151.368
1983	1		115.5	134.621	1.88859	137.75	134.621	148.449	142.763	142.763	148.449
1983	2		73.1	106.671	1.75065	119.63	106.671	145.106	140.119	140.119	145.106
1983	3		88.7	116.896	1.81461	117.29	116.896	140.883	135.645	135.645	140.883
1983	4		109.6	130.718	1.87537	119.85	130.718	136.47	131.279	131.279	136.47
1983	5		132.5	145.837	1.91934	140.11	145.837	131.374	127.367	127.367	131.374
1983	6		131.5	145.179	1.91779	143	145.179	124.046	121.805	121.805	124.046
1983	7		108.9	130.254	1.8737	129.1	130.254	118.714	117.339	117.339	118.714
1983	8		96	121.717	1.83862	127.54	121.717	118.391	117.239	117.239	118.391
1983	9		69.9	104.596	1.73502	110.2	104.596	119.272	119.029	119.029	119.272
1983	10		72.5	106.282	1.74779	111.78	106.282	119.831	119.271	119.271	119.831
1983	11		45.7	89.3886	1.58034	90.45	89.3886	119.868	117.762	117.762	119.868
1983	12		45.6	89.3283	1.57954	90.53	89.3283	117.847	114.962	114.962	117.847
1984	1		74.8	107.778	1.75858	112.43	107.778	114.661	111.696	169.959	171.557
1984	2		110.2	131.115	1.87678	137.2	131.115	111.38	108.641
1984	3		116.7	135.414	1.8911	120.86	135.414	108.335	105.86	% DIFF=
1984	4		90.4	118.018	1.8205	129.7	118.018	105.417	103.248	-0.931343
1984	5		96.9	122.313	1.84136	131.15	122.313	103.142	101.354	Standard	Standard
1984	6		65.1	101.504	1.70972	103.45	101.504	101.77	100.337	deviation	deviation
1984	7		55.7	95.5416	1.65295	92.18	95.5416	99.3792	98.3724	3.60013	3.47775
1984	8		35	83.1201	1.48573	85.73	83.1201	94.9771	94.6521
1984	9		22.6	76.4518	1.3491	78.91	76.4518	90.2425	89.7626	0.95	0.95
1984	10		12.6	71.7376	1.2129	73.05	71.7376	85.9796	85.4127	under	under
1984	11		26.5	78.4648	1.39559	74.58	78.4648	81.6829	81.9413	162.759	164.601
1984	12		21.4	75.8503	1.33409	73.48	75.8503	78.5954	79.3274	upper	upper
1985	1		17.8	74.1014	1.28695	72.09	74.1014	77.1008	78.0074	177.159	178.512
1985	2		20.7	75.5036	1.32517	71.89	75.5036	76.1267	77.089
1985	3		16.9	73.6779	1.27465	72.54	73.6779	75.2446	76.2366
1985	4		20.4	75.356	1.32132	75.71	75.356	74.9292	76.0865
1985	5		32.4	81.6611	1.45968	82.02	81.6611	74.8937	76.0905
1985	6		28.3	79.4218	1.41591	78.48	79.4218	74.7679	75.799
1985	7		39.9	85.9424	1.53144	81.28	85.9424	74.675	75.4294
1985	8		10.1	70.6777	1.17461	73.25	70.6777	75.0279	75.3258
1985	9		4.3	68.4376	1.07845	70.22	68.4376	75.5829	75.4213
1985	10		22	76.15	1.34164	74.17	76.15	75.7313	75.4039
1985	11		17.9	74.1488	1.2883	72.61	74.1488	75.4021	75.0972
1985	12		15.8	73.1682	1.25933	72.43	73.1682	74.7129	74.2394
1986	1		2.8	67.913	1.05181	70.91	67.913	73.9829	73.2422
1986	2		27.9	79.2077	1.41145	81.54	79.2077	73.485	72.7513
1986	3		13.8	72.2647	1.23064	76.21	72.2647	73.3204	72.7599
1986	4		22.4	76.3509	1.34662	75.6	76.3509	73.6304	73.1849
1986	5		16.1	73.3063	1.26354	74.23	73.3063	74.0921	73.5493
1986	6		0.6	67.1881	1.01134	69.73	67.1881	74.1254	73.3265
1986	7		18.1	74.2438	1.291	72.51	74.2438	74.0092	73.2623
1986	8		9.9	70.5952	1.17147	70.07	70.5952	73.4896	72.9104
1986	9		5.1	68.727	1.09235	69.45	68.727	72.8767	72.517
1986	10		40.1	86.0595	1.53322	82.38	86.0595	73.1654	73.1365
1986	11		15.4	72.9851	1.25368	75.48	72.9851	74.2233	74.1943
1986	12		5.8	68.9856	1.10435	70.36	68.9856	75.3142	75.0093
1987	1		9.8	70.5541	1.16989	70.19	70.5541	76.3629	75.7634
1987	2		3.4	68.1199	1.06256	69.79	68.1199	77.8896	77.0483
1987	3		17.4	73.9125	1.28151	73.25	73.9125	79.545	78.6606
1987	4		46	89.5696	1.58272	85.49	89.5696	80.9067	80.0325
1987	5		39.1	85.4756	1.52427	89.73	85.4756	82.5171	81.3925
1987	6		18.8	74.5785	1.30037	80.41	74.5785	84.3775	82.6072
1987	7		38.2	84.9532	1.51606	87	84.9532	86.6888	84.4946
1987	8		47.9	90.7215	1.59752	92.22	90.7215	89.4808	86.8078
1987	9		42.2	87.2964	1.55148	87.03	87.2964	92.5321	89.5462
1987	10		63.4	100.415	1.70019	97.48	100.415	95.8092	93.0984
1987	11		48.8	91.2705	1.60434	99.03	91.2705	98.5667	95.7038
1987	12		29.1	79.8524	1.42472	91.46	79.8524	102.38	99.3608
1988	1		70.5	104.985	1.73802	104.56	104.985	107.965	104.611
1988	2		45.4	89.2079	1.57794	102.43	89.2079	113.652	109.603
1988	3		91.2	118.546	1.82321	113.84	118.546	119.189	114.807	114.807	119.189
1988	4		108.8	130.188	1.87346	123.55	130.188	124.953	120.073	120.073	124.953
1988	5		74.2	107.387	1.75581	117.85	107.387	130.16	125.556	125.556	130.16
1988	6		124.3	140.434	1.90574	143.81	140.434	136.651	133.893	133.893	136.651
1988	7		131.4	145.113	1.91764	157.65	145.113	146.04	143.088	143.088	146.04
1988	8		139.4	150.371	1.92925	158.04	150.371	155.949	151.298	151.298	155.949
1988	9		142.7	152.534	1.93355	154.11	152.534	164.437	157.881	157.881	164.437
1988	10		156.5	161.55	1.94888	168.72	161.55	170.96	161.62	161.62	170.96
1988	11		156.8	161.745	1.94917	152.77	161.745	176.957	166.496	166.496	176.957
1988	12		231.2	209.458	1.98763	193.51	209.458	184.455	174.073	174.073	184.455
1989	1		210.1	196.059	1.98154	227.84	196.059	190.019	179.679	179.679	190.019
1989	2		208.7	195.167	1.98104	216.96	195.167	193.963	183.494	183.494	193.963
1989	3		170.4	170.574	1.96074	203.02	170.574	199.746	188.188	188.188	199.746
1989	4		166.3	167.918	1.95756	190.93	167.918	204.451	191.893	191.893	204.451
1989	5		195.4	186.669	1.97559	194.4	186.669	209.279	195.559	195.559	209.279
1989	6		284.5	242.994	1.99551	247.2	242.994	213.032	197.207	197.207	213.032
1989	7		180.5	177.097	1.9676	187.81	177.097	212.549	197.142	197.142	212.549
1989	8		232	209.964	1.98782	222.53	209.964	209.745	196.613	196.613	209.745
1989	9		225.1	205.593	1.98611	228.41	205.593	207.29	196.198	196.198	207.29
1989	10		212.2	197.397	1.98226	207.35	197.397	206.443	197.398	197.398	206.443
1989	11		238.2	213.885	1.98917	230	213.885	206.246	197.486	197.486	206.246
1989	12		211.4	196.887	1.98199	206.35	196.887	203.277	193.464	193.464	203.277
1990	1	1990	227.4	207.051	1.98671	203.41	207.051	200.274	190.268	190.268	200.274
1990	2		171.8	171.48	1.96177	174.09	171.48	200.456	191.081	191.081	200.456
1990	3		191.7	184.297	1.97381	186.99	184.297	198.64	190.115	190.115	198.64
1990	4		189.7	183.014	1.97279	186.62	183.014	195.488	188.281	188.281	195.488
1990	5		175.2	173.678	1.96416	193.99	173.678	192.312	186.362	186.362	192.312
1990	6		153.3	159.464	1.94567	176.34	159.464	189.914	184.403	184.403	189.914
1990	7		191.1	183.913	1.97351	186.61	183.913	190.367	183.171	183.171	190.367
1990	8		252.1	222.652	1.99169	228.09	222.652	193.776	184.141	184.141	193.776
1990	9		169.1	169.733	1.95976	179.27	169.733	198.099	186.104	186.104	198.099
1990	10		199.4	189.229	1.97737	180.85	189.229	200.353	186.457	186.457	200.353
1990	11		178.8	176.001	1.96653	180.26	176.001	200.935	186.444	186.444	200.935
1990	12		197.1	187.758	1.97636	198.54	187.758	202.498	188.132	188.132	202.498
1991	1		195.3	186.605	1.97554	222.11	186.605	205.384	191.345	191.345	205.384
1991	2		240.3	215.211	1.9896	237.2	215.211	206.205	192.349	192.349	206.205
1991	3		197	187.694	1.97632	227.63	187.694	205.818	192.047	192.047	205.818
1991	4		197.6	188.078	1.97659	200.07	188.078	206.751	191.98	191.98	206.751
1991	5		166.9	168.307	1.95804	194.51	168.307	207.051	191.398	191.398	207.051
1991	6		224.7	205.339	1.98601	213.33	205.339	207.321	191.29	191.29	207.321
1991	7		240.2	215.148	1.98958	218.89	215.148	207.611	191.782	191.782	207.611
1991	8		240.8	215.527	1.9897	215.52	215.527	206.686	191.609	191.609	206.686
1991	9		168.9	169.603	1.95961	182.54	169.603	203.822	190.117	190.117	203.822
1991	10		197.1	187.758	1.97636	199.97	187.758	199.724	187.384	187.384	199.724
1991	11		159.5	163.502	1.95171	168.34	163.502	195.276	183.901	183.901	195.276
1991	12		212.6	197.652	1.98239	216.95	197.652	188.64	178.498	178.498	188.64
1992	1		198.3	188.526	1.97689	210.65	188.526	181.336	171.691	171.691	181.336
1992	2		230.7	209.141	1.98752	226.46	209.141	174.137	164.279	164.279	174.137
1992	3		151	157.963	1.94324	169.65	157.963	167.682	158.207	158.207	167.682
1992	4		142.2	152.207	1.93292	159.68	152.207	162.108	154.434	154.434	162.108
1992	5		94.3	120.594	1.83332	128.15	120.594	158.127	151.897	151.897	158.127
1992	6		98.5	123.371	1.84611	120.43	123.371	153.605	148.634	148.634	153.605
1992	7		114.2	133.761	1.8858	136.5	133.761	146.285	143.002	143.002	146.285
1992	8		91.9	119.008	1.82555	125.12	119.008	138.751	137.051	137.051	138.751
1992	9		94	120.395	1.83237	118.02	120.395	133.669	132.95	132.95	133.669
1992	10		133.4	146.429	1.92071	130.73	146.429	130.434	130.302	130.302	130.434
1992	11		129.6	143.928	1.91477	142.03	143.928	128.088	128.562	128.562	128.088
1992	12		122	138.916	1.90153	134.74	138.916	127.215	127.347	127.347	127.215
1993	1		81.4	112.094	1.78703	117.16	112.094	125.467	125.626	125.626	125.467
1993	2		127.8	142.742	1.9118	139.14	142.742	122.825	123.897	123.897	122.825
1993	3		102.4	125.952	1.8571	135.01	125.952	120.356	121.457	121.457	120.356
1993	4		94.4	120.66	1.83364	116.67	120.66	117.807	118.105	118.105	117.807
1993	5		78.8	110.39	1.77624	114.86	110.39	114.504	114.185	169.665	178.34
1993	6		69.6	104.402	1.73351	112.77	104.402	111.111	110.505
1993	7		80.4	111.438	1.78294	102.22	111.438	109.484	109.131	% DIFF=
1993	8		62.5	99.841	1.69502	95.98	99.841	107.492	107.239	-4.86455
1993	9		31.2	80.9975	1.44722	87.9	80.9975	103.847	103.774	Standard	Standard
1993	10		71.1	105.373	1.74099	99.68	105.373	100.409	100.557	deviation	deviation
1993	11		48.2	90.9043	1.5998	93.81	90.9043	97.4846	97.5623	3.40172	3.97341
1993	12		68.4	103.627	1.72736	101.52	103.627	94.7258	95.5317
1994	1		84.9	114.393	1.80073	111.33	114.393	92.5554	93.9634	0.95	0.95
1994	2		54.9	95.0412	1.64764	97.17	95.0412	91.0117	92.4559	under	under
1994	3		47.5	90.4782	1.59445	89.5	90.4782	89.9296	91.9634	162.861	170.393
1994	4		27.4	78.9412	1.40584	79.67	78.9412	89.0733	92.0764	upper	upper
1994	5		29.8	80.2318	1.43232	81.67	80.2318	87.9387	91.5172	176.468	186.287
1994	6		39.7	85.8255	1.52966	79.75	85.8255	86.4925	90.1459
1994	7		50.6	92.3743	1.61764	83.15	92.3743	84.3529	87.8668
1994	8		34.3	82.7245	1.47884	78	82.7245	82.4783	86.2746
1994	9		40.5	86.294	1.53676	79.91	86.294	81.6871	86.0112
1994	10		67.1	102.789	1.72054	87.12	102.789	81.405	85.8563
1994	11		29.5	80.0689	1.42908	79.14	80.0689	81.1554	85.5082
1994	12		32.2	81.55	1.45763	81.48	81.55	80.8979	84.892
1995	1		32.6	81.7723	1.46173	80.02	81.7723	80.545	83.7903
1995	2		45.8	89.4489	1.58113	83.49	89.4489	80.1629	82.7298
1995	3		46.3	89.7508	1.58509	84.19	89.7508	79.7667	81.8296
1995	4		21.6	75.95	1.33662	78.21	75.95	79.0654	80.3591
1995	5		19.4	74.8681	1.3083	77.14	74.8681	78.3892	79.1159
1995	6		22.5	76.4013	1.34786	78.1	76.4013	77.6492	78.4281
1995	7		20.4	75.356	1.32132	76.33	75.356	76.8538	77.6564
1995	8		18.2	74.2914	1.29235	75.65	74.2914	75.9746	76.4286
1995	9		15.7	73.1223	1.25792	72.75	73.1223	74.8325	74.8557
1995	10		30.6	80.6682	1.44088	77.45	80.6682	73.8962	73.8307
1995	11		14	72.3537	1.23356	72.58	72.3537	73.325	73.3398
1995	12		14.9	72.7578	1.24656	70.28	72.7578	72.8471	73.0021
1996	1		13.3	72.0437	1.2233	72.13	72.0437	72.4908	72.7157
1996	2		7.7	69.7119	1.1361	70.28	69.7119	72.3287	72.5807
1996	3		12.6	71.7376	1.2129	69.99	71.7376	72.1646	72.3966
1996	4		6.8	69.3635	1.1212	69.94	69.3635	71.6962	71.622
1996	5		7.6	69.6728	1.13446	71.7	69.6728	71.5304	71.2815
1996	6		16.5	73.4915	1.26912	72.07	73.4915	71.8529	71.4844
1996	7		11.8	71.3927	1.20084	73.81	71.3927	71.9433	71.3656
1996	8		19.7	75.0138	1.31223	74.28	75.0138	71.9737	71.3194
1996	9		3	67.9815	1.05541	70.18	67.9815	72.1467	71.3663
1996	10		0.7	67.2199	1.01321	68.78	67.2199	72.4667	71.6611
1996	11		24.9	77.6285	1.37693	77.27	77.6285	72.8779	72.3072
1996	12		14	72.3537	1.23356	73.33	72.3537	73.1629	72.7354
1997	1		7.4	69.5949	1.13116	71.25	69.5949	73.2408	72.8411
1997	2		11	71.0531	1.1886	71.89	71.0531	73.5121	73.2152
1997	3		12.1	71.5214	1.20539	72.53	71.5214	74.9154	74.8229
1997	4		23	76.6542	1.35403	75.08	76.6542	76.6904	76.6872
1997	5		25.4	77.8884	1.38282	76.43	77.8884	78.1575	77.9075
1997	6		20.8	75.553	1.32645	74.18	75.553	79.8292	79.4777
1997	7		12.9	71.8683	1.21737	73.57	71.8683	81.4571	81.2333
1997	8		35.7	83.5177	1.49252	81.03	83.5177	83.0233	82.9061
1997	9		59.7	98.0613	1.67835	97.11	98.0613	85.2983	85.4912
1997	10		32.8	81.8837	1.46377	84.45	81.8837	88.4354	88.3812
1997	11		50.4	92.2513	1.61619	96.81	92.2513	91.4712	90.7881
1997	12		55.5	95.4164	1.65163	93.91	95.4164	94.425	93.7839
1998	1		44.5	88.6672	1.57066	89.74	88.6672	97.8354	97.6523
1998	2		50.2	92.1284	1.61473	90.99	92.1284	102.266	102.032
1998	3		82	112.488	1.78944	108.03	112.488	106.63	106.293
1998	4		70.6	105.049	1.73852	114.87	105.049	109.754	109.449
1998	5		74	107.257	1.75488	109.5	107.257	112.779	111.892
1998	6		90.5	118.084	1.82084	112	118.084	116.598	114.891	114.891	116.598
1998	7		96.7	122.18	1.84075	117.6	122.18	120.726	117.729	117.729	120.726
1998	8		121.1	138.322	1.89983	143.33	138.322	124.725	120.119	120.119	124.725
1998	9		132	145.508	1.91857	139.55	145.508	127.275	121.998	121.998	127.275
1998	10		78.5	110.194	1.77497	116.99	110.194	127.938	123.218	123.218	127.938
1998	11		97.3	122.577	1.84256	136.87	122.577	129.826	125.921	125.921	129.826
1998	12		119.2	137.067	1.89615	145.5	137.067	134.22	131.168	131.168	134.22
1999	1		86	115.117	1.80485	137.22	115.117	139.044	136.44	136.44	139.044
1999	2		98	123.04	1.84464	139.48	123.04	142.512	139.121	139.121	142.512
1999	3		103.5	126.68	1.86005	120.75	126.68	143.699	138.995	138.995	143.699
1999	4		93.6	120.131	1.83109	118.07	120.131	145.572	140.758	140.758	145.572
1999	5		149.6	157.049	1.94171	151.61	157.049	149.66	145.708	145.708	149.66
1999	6		207.2	194.211	1.98049	175.33	194.211	152.595	148.123	148.123	152.595
1999	7		173.5	172.579	1.96299	170.05	172.579	154.095	149.353	149.353	154.095
1999	8		142.3	152.272	1.93304	174.12	152.272	155.994	152.503	152.503	155.994
1999	9		106.3	128.533	1.8673	137.25	128.533	160.793	157.449	157.449	160.793
1999	10		168.7	169.474	1.95945	164.24	169.474	167.187	163.21	163.21	167.187
1999	11		188.3	182.115	1.97206	187.74	182.115	171.82	166.32	166.32	171.82
1999	12		116.8	135.48	1.8913	165.06	135.48	174.091	166.25	166.25	174.091
2000	1	2000	133.1	146.232	1.92025	153.65	146.232	176.295	167.62	167.62	176.295
2000	2		165.7	167.529	1.95707	168.64	167.529	177.781	170.536	170.536	177.781
2000	3		217.7	200.895	1.98402	206.77	200.895	179.482	172.932	172.932	179.482
2000	4		191.5	184.169	1.97371	185.49	184.169	181.571	173.559	173.559	181.571
2000	5		165.9	167.659	1.95724	195.38	167.659	181.227	172.009	172.009	181.227
2000	6		188	181.922	1.9719	186.07	181.922	180.898	171.923	171.923	180.898
2000	7		244.3	217.736	1.99036	212.21	217.736	181.387	172.91	172.91	181.387
2000	8		180.5	177.097	1.9676	167.63	177.097	180.681	171.963	171.963	180.681
2000	9		156	161.224	1.94839	184.56	161.224	178.362	169.37	169.37	178.362
2000	10		141.6	151.813	1.93215	167.07	151.813	177.447	167.181	167.181	177.447
2000	11		158.1	162.591	1.95041	176.64	162.591	175.932	165.733	165.733	175.932
2000	12		143.3	152.928	1.9343	168.28	152.928	173.806	165.484	165.484	173.806
2001	1		142.6	152.469	1.93342	162.16	152.469	170.363	162.625	162.625	170.363
2001	2		121.5	138.586	1.90059	143.18	138.586	167.325	158.856	158.856	167.325
2001	3		165.8	167.594	1.95716	176.57	167.594	169.625	160.538	160.538	169.625
2001	4		161.7	164.932	1.95369	193.73	164.932	173.538	164.15	164.15	173.538
2001	5		142.1	152.141	1.93279	150.79	152.141	176.675	166.067	166.067	176.675
2001	6		202.9	191.466	1.97883	179.64	191.466	180.784	168.451	168.451	180.784
2001	7		123	139.576	1.90338	136.01	139.576	185.933	171.472	171.472	185.933
2001	8		161.5	164.802	1.95351	170.92	164.802	190.737	173.936	173.936	190.737
2001	9		238.2	213.885	1.98917	236.47	213.885	193.212	174.756	174.756	193.212
2001	10		194.1	185.836	1.97498	209.06	185.836	193.212	174.927	174.927	193.212
2001	11		176.6	174.582	1.9651	209.93	174.582	194.476	176.833	176.833	194.476
2001	12		213.4	198.161	1.98266	233.62	198.161	194.772	176.057	176.057	194.772
2002	1		184.6	179.737	1.97003	220.38	179.737	195.641	175.092	175.092	195.641
2002	2		170.2	170.445	1.96059	200.27	170.445	198.293	176.51	176.51	198.293
2002	3		147.1	155.415	1.93888	178.88	155.415	196.586	175.556	175.556	196.586
2002	4		186.9	181.216	1.97131	191.41	181.216	192.399	173.066	173.066	192.399
2002	5		187.5	181.601	1.97163	183.45	181.601	188.796	171.114	171.114	188.796
2002	6		128.8	143.401	1.91346	154.09	143.401	183.579	168.215	168.215	183.579
2002	7		161	164.477	1.95307	182.42	164.477	176.817	164.726	164.726	176.817
2002	8		175.6	173.936	1.96444	188.15	173.936	170.151	160.755	160.755	170.151
2002	9		187.9	181.858	1.97185	178.27	181.858	164.872	156.893	156.893	164.872
2002	10		151.2	158.094	1.94346	166.78	158.094	159.997	153.192	153.192	159.997
2002	11		147.2	155.48	1.939	165.74	155.48	154.747	148.017	148.017	154.747
2002	12		135.3	147.678	1.92352	152.59	147.678	151.664	144.991	144.991	151.664
2003	1		133.5	146.495	1.92086	139.13	146.495	148.864	143.822	143.822	148.864
2003	2		75.7	108.365	1.76267	121.54	108.365	144.151	141.289	141.289	144.151
2003	3		100.7	124.827	1.85241	130.9	124.827	138.845	136.662	136.662	138.845
2003	4		97.9	122.974	1.84434	122.4	122.974	135.688	132.21	132.21	135.688
2003	5		86.8	115.644	1.8078	126.46	115.644	134.377	128.977	128.977	134.377
2003	6		118.7	136.736	1.89516	137.09	136.736	131.844	125.477	125.477	131.844
2003	7		128.3	143.071	1.91264	132.22	143.071	128.944	121.75	121.75	128.944
2003	8		115.4	134.555	1.88837	125.24	134.555	127.028	119.726	119.726	127.028
2003	9		78.5	110.194	1.77497	113.84	110.194	125.495	118.986	118.986	125.495
2003	10		97.8	122.908	1.84405	155.43	122.908	123.816	117.224	117.224	123.816
2003	11		82.9	113.079	1.79301	145.64	113.079	121.951	115.791	115.791	121.951
2003	12		72.2	106.087	1.74635	111.88	106.087	119.403	113.978	113.978	119.403
2004	1		60.6	98.632	1.68381	110.24	98.632	117.525	111.323	111.323	117.525
2004	2		74.6	107.648	1.75766	104.44	107.648	116.655	108.844	108.844	116.655
2004	3		74.8	107.778	1.75858	111.21	107.778	115.777	106.802	106.802	115.777
2004	4		59.2	97.7448	1.67528	101.81	97.7448	113.337	105.367	150.574	159.111
2004	5		72.8	106.477	1.74923	102.29	106.477	109.895	104.372
2004	6		66.5	102.403	1.71734	100.1	102.403	107.733	102.926	% DIFF=
2004	7		83.8	113.67	1.79652	124.14	113.67	106.472	101.504	-5.36594
2004	8		69.7	104.467	1.73401	112.45	104.467	105.633	100.364	Standard	Standard
2004	9		48.8	91.2705	1.60434	105.55	91.2705	104.318	98.6311	deviation	deviation
2004	10		74.2	107.387	1.75581	105.15	107.387	102.763	97.1931	2.62477	3.04996
2004	11		70.1	104.726	1.73602	113.33	104.726	102.194	96.3798
2004	12		28.9	79.7445	1.42253	92.28	79.7445	102.134	95.8303	0.95	0.95
2005	1		48.1	90.8433	1.59904	99.59	90.8433	101.165	94.9942	under	under
2005	2		43.5	88.0693	1.56242	94.95	88.0693	99.8321	94.1696	145.324	153.011
2005	3		39.6	85.7671	1.52877	89.14	85.7671	99.5583	93.6366	upper	upper
2005	4		38.7	85.2431	1.52064	86.55	85.2431	98.57	91.8749	155.823	165.211
2005	5		61.9	99.4586	1.69152	103.9	99.4586	96.1617	89.3283
2005	6		56.8	96.2316	1.66013	97.06	96.2316	94.7812	89.0088
2005	7		62.4	99.7772	1.69444	103.93	99.7772	93.815	89.1264
2005	8		60.5	98.5685	1.6832	100.66	98.5685	92.1817	87.6946
2005	9		37.2	84.3762	1.50678	110.77	84.3762	90.7371	86.402
2005	10		13.2	71.9997	1.22182	76.21	71.9997	90.2771	86.1956
2005	11		27.5	78.9944	1.40696	84.47	78.9944	89.53	85.8566
2005	12		59.3	97.8081	1.6759	88.01	97.8081	87.895	84.4444
2006	1		20.9	75.6024	1.32773	80.67	75.6024	86.0812	82.6804
2006	2		5.7	68.9484	1.10264	74.67	68.9484	84.2208	80.7411
2006	3		17.3	73.8654	1.28014	74.75	73.8654	82.0967	79.4752
2006	4		50.3	92.1898	1.61546	89.9	92.1898	80.6733	79.1999
2006	5		37.2	84.3762	1.50678	82.62	84.3762	80.5829	79.42
2006	6		24.5	77.4217	1.37218	79.1	77.4217	80.5688	78.7123
2006	7		22.2	76.2503	1.34413	78.36	76.2503	80.5683	77.9978
2006	8		20.8	75.553	1.32645	81.58	75.553	80.6313	78.406
2006	9		23.7	77.0108	1.36256	78.87	77.0108	80.5413	78.4514
2006	10		14.9	72.7578	1.24656	73.95	72.7578	79.6963	77.2972
2006	11		35.7	83.5177	1.49252	84.56	83.5177	78.71	75.93
2006	12		22.3	76.3006	1.34538	87.58	76.3006	78.3204	75.4683
2007	1		29.3	79.9606	1.4269	81.09	79.9606	78.0187	75.259
2007	2		18.4	74.3869	1.29503	75.76	74.3869	77.3792	74.909
2007	3		7.2	69.5174	1.12786	71.5	69.5174	76.4633	74.3391
2007	4		5.4	68.8372	1.09751	72.87	68.8372	75.72	73.7574
2007	5		19.5	74.9166	1.30961	75.98	74.9166	74.7467	72.8872
2007	6		21.3	75.8006	1.33282	76.39	75.8006	73.5596	72.1356
2007	7		15.1	72.8485	1.24941	73.83	72.8485	72.6746	71.551
2007	8		9.8	70.5541	1.16989	70.76	70.5541	72.0137	70.7996
2007	9		4	68.3307	1.07318	67.71	68.3307	71.7792	70.6776
2007	10		1.5	67.4781	1.0281	67.27	67.4781	71.72	70.7971
2007	11		2.8	67.913	1.05181	67.88	67.913	71.3725	70.5046
2007	12		17.3	73.8654	1.28014	75.77	73.8654	70.7654	69.9459
2008	1		4.1	68.3663	1.07494	71.66	68.3663	70.1629	69.4169
2008	2		2.9	67.9472	1.05361	69.33	67.9472	69.7896	69.0368
2008	3		15.5	73.0307	1.2551	72.3	73.0307	69.6662	68.853
2008	4		3.6	68.1898	1.06611	70.65	68.1898	69.6858	68.8519
2008	5		4.6	68.5453	1.08369	69.86	68.5453	69.67	68.9477
2008	6		5.2	68.7637	1.09408	67.94	68.7637	69.2642	68.732
2008	7		0.6	67.1881	1.01134	67.82	67.1881	68.72	68.4194
2008	8		0.3	67.0935	1.00568	67.81	67.0935	68.4975	68.3561
2008	9		1.2	67.3804	1.02254	67.7	67.3804	68.2875	68.089
2008	10		4.2	68.4019	1.0767	67.75	68.4019	68.1033	67.8119
2008	11		6.6	69.2871	1.11786	67.02	69.2871	68.1662	67.7532
2008	12		1	67.3158	1.01882	66.89	67.3158	68.3683	67.7454
2009	1		1.3	67.4128	1.0244	67.48	67.4128	68.5929	67.8327
2009	2		1.2	67.3804	1.02254	68.17	67.3804	68.7521	67.899
2009	3		0.6	67.1881	1.01134	68.42	67.1881	68.9429	67.9826
2009	4		1.2	67.3804	1.02254	70.11	67.3804	69.2454	68.1246
2009	5		2.9	67.9472	1.05361	71.91	67.9472	69.6179	68.1839
2009	6		6.3	69.1733	1.11281	70.74	69.1733	70.1421	68.4422
2009	7		5.5	68.8742	1.09923	70.41	68.8742	70.9246	69.0083
2009	8		0	67	1	69.04	67	71.9979	69.8271
2009	9		7.1	69.4788	1.1262	71.05	69.4788	73.1742	70.749
2009	10		7.7	69.7119	1.1361	71.66	69.7119	74.0004	71.3073
2009	11		6.9	69.4018	1.12287	72.05	69.4018	74.3954	71.6316
2009	12		16.3	73.3988	1.26633	74.44	73.3988	74.6988	72.0386
2010	1	2010	19.5	74.9166	1.30961	78.71	74.9166	75.3538	72.635
2010	2		28.5	79.5291	1.41813	82.7	79.5291	76.3496	73.5531
2010	3		24	77.1644	1.36619	82.12	77.1644	77.3025	74.7015
2010	4		10.4	70.8021	1.1793	76.24	70.8021	78.1354	75.8289
2010	5		13.9	72.3091	1.2321	75.26	72.3091	78.8833	76.9121
2010	6		18.8	74.5785	1.30037	74.67	74.5785	79.5446	77.6372
2010	7		25.2	77.7843	1.38047	82.2	77.7843	79.9267	77.9703
2010	8		29.6	80.1231	1.43016	81.15	80.1231	80.4092	78.6123
2010	9		36.4	83.9173	1.49923	81.81	83.9173	82.5071	80.4678
2010	10		33.6	82.3309	1.47186	80.89	82.3309	85.7638	83.4227
2010	11		34.4	82.7809	1.47983	80.77	82.7809	88.2596	86.0322
2010	12		24.5	77.4217	1.37218	81.59	77.4217	90.2071	87.9496
2011	1		27.3	78.888	1.40471	80.73	78.888	91.8504	89.8057
2011	2		48.3	90.9652	1.60056	92.26	90.9652	93.4437	91.6876
2011	3		78.6	110.259	1.77539	122.91	110.259	96.6887	94.8365
2011	4		76.1	108.626	1.76447	113.61	108.626	101.293	99.5353
2011	5		58.2	97.1131	1.66905	97.79	97.1131	106.505	104.803
2011	6		56.1	95.7922	1.65558	98.88	95.7922	111.711	109.823
2011	7		64.5	101.119	1.70639	97.43	101.119	116.096	113.776	113.776	116.096
2011	8		65.8	101.953	1.71355	104.16	101.953	118.67	115.504	115.504	118.67
2011	9		120.1	137.661	1.89791	136.68	137.661	118.823	115.71	115.71	118.823
2011	10		125.7	141.357	1.90821	136.52	141.357	118.495	116.197	116.197	118.495
2011	11		139.1	150.174	1.92885	150.23	150.174	119.615	117.503	117.503	119.615
2011	12		109.3	130.519	1.87466	137.07	130.519	121.766	119.512	119.512	121.766
2012	1		94.4	120.66	1.83364	130.49	120.66	124.691	121.454	121.454	124.691
2012	2		47.8	90.6607	1.59675	104.29	90.6607	127.169	123.215	123.215	127.169
2012	3		86.6	115.512	1.80706	114.53	115.512	127.277	123.278	123.278	127.277
2012	4		85.9	115.052	1.80448	114.14	115.052	126.182	121.198	121.198	126.182
2012	5		96.5	122.048	1.84015	124.12	122.048	124.262	118.428	118.428	124.262
2012	6		92	119.074	1.82588	124.19	119.074	121.597	115.583	115.583	121.597
2012	7		100.1	124.43	1.85072	142.31	124.43	119.934	114.201	114.201	119.934
2012	8		94.8	120.924	1.8349	118.75	120.924	119.513	114.588	114.588	119.513
2012	9		93.7	120.197	1.83141	124.7	120.197	119.234	114.701	114.701	119.234
2012	10		76.5	108.887	1.76625	122.22	108.887	119.542	115.063	115.063	119.542
2012	11		87.6	116.171	1.8107	118.45	116.171	120.455	116.305	116.305	120.455
2012	12		56.8	96.2316	1.66013	104.87	96.2316	120.466	116.54	116.54	120.466
2013	1		96.1	121.783	1.83893	122.78	121.783	119.092	115.738	115.738	119.092
2013	2		60.9	98.8225	1.6856	101.9	98.8225	118.092	115.273	115.273	118.092
2013	3		78.3	110.063	1.77411	110.22	110.063	117.184	114.132	114.132	117.184
2013	4		107.3	129.195	1.8698	125.84	129.195	116.722	114.115	114.115	116.722
2013	5		120.2	137.727	1.8981	134.33	137.727	118.255	115.882	115.882	118.255
2013	6		76.7	109.017	1.76714	114.25	109.017	120.993	118.446	118.446	120.993
2013	7		86.2	115.249	1.80559	119.29	115.249	124.049	120.861	120.861	124.049
2013	8		91.8	118.942	1.82522	117.75	118.942	128.167	123.768	123.768	128.167
2013	9		54.5	94.7915	1.64495	103.91	94.7915	132.453	127.485	127.485	132.453
2013	10		114.4	133.893	1.88623	131.92	133.893	134.862	129.015	129.015	134.862
2013	11		113.9	133.563	1.88515	145.55	133.563	135.6	128.946	128.946	135.6
2013	12		124.2	140.368	1.90556	143.49	140.368	136.041	129.453	129.453	136.041
2014	1		117	135.613	1.89172	157.5	135.613	137.503	130.558	130.558	137.503
2014	2		146.1	154.761	1.93771	166.01	154.761	138.879	131.359	131.359	138.879
2014	3		128.7	143.335	1.9133	148.97	143.335	141.135	133.834	133.834	141.135
2014	4		112.5	132.637	1.88205	144.92	132.637	143.893	135.22	135.22	143.893
2014	5		112.5	132.637	1.88205	132.95	132.637	145.09	134.263	134.263	145.09
2014	6		102.9	126.283	1.85845	126.22	126.283	145.813	133.668	133.668	145.813
2014	7		100.2	124.496	1.851	142.4	124.496	145.419	132.695	132.695	145.419
2014	8		106.9	128.93	1.86881	127.67	128.93	142.908	129.857	129.857	142.908
2014	9		130	144.191	1.91542	148.12	144.191	140.257	125.659	125.659	140.257
2014	10		90	117.754	1.81913	153.91	117.754	138.658	122.614	122.614	138.658
2014	11		103.6	126.746	1.86032	152.3	126.746	137.604	120.938	120.938	137.604
2014	12		112.9	132.901	1.88294	154.07	132.901	137.441	119.29	119.29	137.441
2015	1		93	119.735	1.82916	137.48	119.735	136.377	117.356	117.356	136.377
2015	2		66.7	102.532	1.71841	125.77	102.532	134.253	115.255	115.255	134.253
2015	3		54.5	94.7915	1.64495	125.58	94.7915	131.58	112.68	112.68	131.58
2015	4		75.3	108.104	1.76086	129.93	108.104	127.593	110.549	110.549	127.593
2015	5		88.8	116.962	1.81496	122.65	116.962	123.61	108.703	108.703	123.61
2015	6		66.5	102.403	1.71734	132.6	102.403	119.859	106.078	106.078	119.859
2015	7		65.8	101.953	1.71355	110.5	101.953	116.434	103.607	103.607	116.434
2015	8		64.4	101.055	1.70583	108.59	101.055	113.861	102.36	120.205	127.951
2015	9		78.6	110.259	1.77539	103.04	110.259	111.374	102.077
2015	10		63.6	100.543	1.70133	103.3	100.543	108.42	101.095	% DIFF=
2015	11		62.2	99.6497	1.69327	107.32	99.6497	105.796	99.1213	-6.05384
2015	12		58	96.9869	1.66779	109.02	96.9869	102.661	96.995	Standard	Standard
2016	1		57	96.3573	1.66142	100.33	96.3573	99.7683	95.0246	deviation	deviation
2016	2		56.4	95.9804	1.65754	101.17	95.9804	97.9883	93.8072	1.10066	1.35343
2016	3		54.1	94.542	1.64224	90.5	94.542	96.4887	92.538
2016	4		37.9	84.7797	1.5133	94.12	84.7797	95.1413	90.8773	0.95	0.95
2016	5		51.5	92.9292	1.62413	95.47	92.9292	93.1346	89.1222	under	under
2016	6		20.5	75.4052	1.3226	84.55	75.4052	90.3617	87.1909	118.004	125.244
2016	7		32.4	81.6611	1.45968	89.12	81.6611	87.7992	85.4969	upper	upper
2016	8		50.2	92.1284	1.61473	87.25	92.1284	85.6542	84.0106	122.406	130.658
2016	9		44.6	88.7272	1.57147	88.39	88.7272	83.8787	82.4249
2016	10		33.4	82.2189	1.46985	85.61	82.2189	82.6617	81.439
2016	11		21.4	75.8503	1.33409	76.85	75.8503	81.2917	80.5441
2016	12		18.5	74.4347	1.29637	72.94	74.4347	80.1425	79.7551
2017	1		26.1	78.2544	1.39098	74.91	78.2544	79.4604	79.4137
2017	2		26.4	78.4121	1.39444	75.11	78.4121	78.7904	78.6672
2017	3		17.7	74.054	1.28559	73.95	74.054	78.8358	78.2133
2017	4		32.3	81.6055	1.45866	81.46	81.6055	78.7712	77.765
2017	5		18.9	74.6266	1.3017	75.25	74.6266	78.1104	77.0517
2017	6		19.2	74.7713	1.30566	77.19	74.7713	77.7092	76.5755
2017	7		17.8	74.1014	1.28695	80.11	74.1014
2017	8		32.6	81.7723	1.46173	80.18	81.7723
2017	9		43.7	88.1886	1.56408	96.55	88.1886
2017	10		13.2	71.9997	1.22182	75.9	71.9997
2017	11		5.7	68.9484	1.10264	70.7	68.9484
2017	12		8.2	69.9087	1.14427	69.46	69.9087
2018	1					67.78
2018	2					69.96
2018	3					67.58
2018	4					70.45
2018	5					72.53
2018	6					74.95
2018	7					71.88
2018	8					70.78
2018	9					68.9
2018	10					69.12
2018	11					67.52
2018	12					67.86
2019	1					69.29
2019	2					68.86
2019	3
2019	4
2019	5
2019	6
2019	7
2019	8
2019	9
2019	10
2019	11
2019	12

## Sheet: TABLE 5
YEAR	MONTH	YEAR	WDC	FITTED	MEAN		SUNSPOT		SPACEWEATHER	FITTED	% DIFF	% DIFF	FORMULA	HELP
			STP	SUNSPOTS	SUNSPOT		NUMBER		ADJUSTED	ADJ	NEW formula	FITTED	TAPPING	FORMULA
			ADJUSTED	X1,575	NUMBER		*0,635			FLUX	FITTED	TAPPING		TAPPING
1947	3		233.4	266.805	183.8		116.713	64	224.1	180.713	-22.5737	-20.0259	179.222	1.96957
1947	4		265.8	317.835	212.1		134.684	64	265.84	198.684	-25.2508	-25.7699	197.333	1.98222
1947	5		267.1	319.883	285		180.975	64	267.09	244.975	-8.28341	-8.90453	243.307	1.99555
1947	6		233.8	267.435	232.1		147.383	64	224.49	211.383	-9.5879	-6.44245	210.027	1.98784
1947	7		222.3	249.323	223.5		141.923	64	214.01	205.923	-7.3673	-4.40716	204.578	1.98569
1947	8		237.1	272.632	267.4		169.799	64	237.09	233.799	-1.39224	-2.03184	232.273	1.99378
1947	9		201.9	217.192	239.9		152.337	64	194.1	216.337	7.15032	10.7462	214.958	1.98952
1947	10		207.7	226.327	231.7		147.13	64	207.65	211.13	1.65118	1.02296	209.774	1.98775
1947	11		175.8	176.085	181.3		115.126	64	175.76	179.125	1.89164	1.05389	177.612	1.96809
1947	12		171	168.525	164.9		104.712	64	170.93	168.712	-1.3383	-2.29327	167.01	1.95642
1948	1		150.7	136.552	153.6		97.536	64	145.1	161.536	7.19044	10.0343	159.66	1.94598
1948	2		131	105.525	122		77.47	64	131.03	141.47	7.99237	6.01836	138.916	1.90153
1948	3		134.1	110.407	134.3		85.2805	64	134.15	149.281	11.3203	9.5943	147.021	1.92205
1948	4		209.7	229.477	268.5		170.498	64	209.78	234.498	11.8252	11.0512	232.963	1.99391
1948	5		231.4	263.655	246.4		156.464	64	231.5	220.464	-4.72602	-5.37349	219.06	1.99074
1948	6		201.8	217.035	237.5		150.812	64	201.78	214.812	6.44822	5.77969	213.442	1.98903
1948	7		188.7	196.402	201.4		127.889	64	188.72	191.889	1.68998	0.947417	190.508	1.97822
1948	8		177.2	178.29	223.7		142.049	64	177.18	206.049	16.2808	15.5351	204.705	1.98574
1948	9		165.6	160.02	202.9		128.841	64	165.49	192.841	16.4502	15.6966	191.466	1.97883
1948	10		158	148.05	192.9		122.492	64	157.98	186.492	18.0326	17.1459	185.067	1.9744
1948	11		161.8	154.035	135.6		86.106	64	161.77	150.106	-7.22744	-8.58918	147.875	1.92395
1948	12		187.3	194.198	195.3		124.016	64	187.22	188.016	0.382007	-0.32844	186.605	1.97554
1949	1		177.7	179.077	168.6		107.061	64	171.12	171.061	-3.73607	-1.00003	169.409	1.95938
1949	2		214.8	237.51	258		163.83	64	214.94	227.83	6.06611	5.31572	226.366	1.99257
1949	3		201.8	217.035	223		141.605	64	201.8	205.605	1.88553	1.21953	204.261	1.98555
1949	4		183.8	188.685	208.1		132.143	64	183.88	196.143	6.71572	5.93033	194.785	1.98082
1949	5		158.3	148.523	150.4		95.504	64	152.27	159.504	0.760581	3.48163	157.571	1.94259
1949	6		162.5	155.137	172.4		109.474	64	162.56	173.474	6.75323	5.72596	171.868	1.96221
1949	7		165.1	159.232	178.3		113.221	64	165.06	177.221	7.34131	6.43313	175.679	1.96621
1949	8		179.5	181.912	175.3		111.316	64	179.45	175.316	-2.3312	-3.18069	173.742	1.96423
1949	9		174.4	173.88	205.8		130.683	64	174.3	194.683	11.6302	10.9109	193.318	1.97996
1949	10		177.2	178.29	186.3		118.301	64	177.14	182.3	2.87839	2.08304	180.83	1.97098
1949	11		176.5	177.188	203.2		129.032	64	176.42	193.032	9.36657	8.63731	191.658	1.97895
1949	12		160.1	151.357	166.6		105.791	64	160.09	169.791	6.05309	5.01136	168.113	1.9578
1950	1	1950	145.9	128.993	143.9	5	91.3765	64	145.95	155.377	6.4952	5.05004	153.321	1.93505
1950	2		139.8	119.385	134.3		85.2805	64	139.89	149.281	6.78147	5.0974	147.021	1.92205
1950	3		136.4	114.03	155.4		98.679	64	136.41	162.679	19.2661	17.9042	160.833	1.9478
1950	4		165.5	159.862	160.6		101.981	64	165.46	165.981	0.290634	-0.750945	164.217	1.95271
1950	5		160.5	151.987	150.5		95.5675	64	160.5	159.567	-0.580997	-1.78393	157.637	1.9427
1950	6		132.8	108.36	118.3		75.1205	64	132.82	139.12	4.75941	2.74943	136.472	1.89436
1950	7		138.5	117.337	128.9		81.8515	64	131.19	145.851	5.30794	9.35795	143.467	1.91363
1950	8		123.9	94.3425	120.6		76.581	64	123.87	140.581	13.4633	11.4001	137.991	1.89888
1950	9		99.7	56.2275	72.7		46.1645	64	99.58	110.165	10.496	6.86035	106.412	1.74875
1950	10		99.3	55.5975	87		55.245	64	94.72	119.245	20.0856	22.2297	115.776	1.80853
1950	11		99.7	56.2275	77.7		49.3395	64	99.68	113.34	13.6805	10.0226	109.671	1.77152
1950	12		98	53.55	76.7		48.7045	64	97.96	112.704	15.0046	11.2875	109.017	1.76714
1951	1		104.5	63.7875	85		53.975	64	99.97	117.975	12.8947	14.4936	114.459	1.80111
1951	2		99.4	55.755	84.8		53.848	64	99.38	117.848	18.5594	15.0409	114.328	1.80035
1951	3		101.5	59.0625	79.3		50.3555	64	101.48	114.356	12.6655	9.1027	110.717	1.77836
1951	4		128	100.8	131.7		83.6295	64	122.41	147.63	15.3355	18.708	145.31	1.9181
1951	5		172.5	170.887	153.7		97.5995	64	172.43	161.599	-6.31913	-7.36821	159.725	1.94608
1951	6		166.9	162.067	142.4		90.424	64	166.87	154.424	-7.47513	-8.70867	152.338	1.93317
1951	7		120.2	88.515	87.2		55.372	64	120.18	119.372	-0.688852	-3.55493	115.908	1.80925
1951	8		112.5	76.3875	86.5		54.9275	64	112.5	118.928	5.71333	2.6192	115.447	1.8067
1951	9		119.1	86.7825	117.7		74.7395	64	119.05	138.74	16.4899	14.3009	136.075	1.89315
1951	10		105.3	65.0475	73.3		46.5455	64	105.26	110.546	4.98148	1.46449	106.802	1.7516
1951	11		102.1	60.0075	74.2		47.117	64	102.04	111.117	8.83154	5.24019	107.387	1.75581
1951	12		99.2	55.44	65		41.275	64	95.22	105.275	6.12399	6.5319	101.44	1.70917
1952	1		92.4	44.73	57.9		36.7665	64	88.33	100.767	9.05465	9.7293	96.9239	1.66716
1952	2		84.2	31.815	32.4		20.574	64	84.12	84.574	0.444181	-2.92313	81.6611	1.45968
1952	3		77.8	21.735	31.5		20.0025	64	74.25	84.0025	7.97237	9.31018	81.1628	1.45036
1952	4		84.6	32.445	41.7		26.4795	64	84.54	90.4795	6.94976	2.91061	87.0006	1.5472
1952	5		82.7	29.4525	33.6		21.336	64	82.68	85.336	3.18742	-0.422197	82.3309	1.47186
1952	6		87.5	37.0125	52		33.02	64	84.63	97.02	10.88	10.1716	93.2382	1.62768
1952	7		91.7	43.6275	56.1		35.6235	64	91.7	99.6235	8.64068	4.46263	95.7922	1.65558
1952	8		95.6	49.77	77.8		49.403	64	95.51	113.403	18.6224	14.8947	109.736	1.77195
1952	9		82.3	28.8225	40.4		25.654	64	79.25	89.654	8.9356	8.81425	86.2353	1.53587
1952	10		82.4	28.98	34.2		21.717	64	82.19	85.717	4.02549	0.581778	82.6682	1.47785
1952	11		81.6	27.72	31.8		20.193	64	81.48	84.193	3.1777	-0.185947	81.3285	1.45349
1952	12		83	29.925	48.9		31.0515	64	82.99	95.0515	14.5199	10.0513	91.3316	1.60509
1953	1		80.5	25.9875	37.9		24.0665	64	77	88.0665	9.39938	10.1035	84.7797	1.5133
1953	2		71.1	11.1825	5.9		3.7465	64	67.65	67.7465	-4.7166	2.0295	69.023	1.10605
1953	3		69.7	8.9775	14.7		9.3345	64	66.21	73.3345	5.21449	9.75303	72.6675	1.24369
1953	4		81.6	27.72	39.6		25.146	64	81.53	89.146	9.24755	5.19702	85.7671	1.52877
1953	5		74.1	15.9075	18.3		11.6205	64	74.1	75.6205	2.05196	0.322671	74.3391	1.29369
1953	6		75.3	17.7975	31.5		20.0025	64	75.3	84.0025	11.5571	7.78594	81.1628	1.45036
1953	7		72.1	12.7575	12.7		8.0645	64	72.09	72.0645	-0.0492372	-0.428534	71.7811	1.21439
1953	8		77.4	21.105	33.6		21.336	64	74.33	85.336	10.2532	10.7641	82.3309	1.47186
1953	9		75.1	17.4825	28		17.78	64	75.05	81.78	8.89481	5.61108	79.2611	1.41257
1953	10		71.5	11.8125	12.3		7.8105	64	71.41	71.8105	0.434266	0.276757	71.6076	1.2084
1953	11		69.8	9.135	2.5		1.5875	64	67.2	65.5875	-6.0351	0.909155	67.811	1.04639
1953	12		68.6	7.245	3.9		2.4765	64	68.53	66.4765	-3.09548	-0.342407	68.2953	1.07142
1954	1		66.5	3.9375	0.4		0.254	64	63.58	64.254	-3.37744	5.57556	67.1249	1.00757
1954	2		67.5	5.5125	0.8		0.508	64	67.44	64.508	-4.43259	-0.27915	67.2517	1.01509
1954	3		71.1	11.1825	15.8		10.033	64	71.11	74.033	4.12518	2.89439	73.1682	1.25933
1954	4		69.2	8.19	2.7		1.7145	64	69.2	65.7145	-5.03685	-1.90917	67.8789	1.05001
1954	5		69.5	8.6625	1.2		0.762	64	66.84	64.762	-6.81727	0.808476	67.3804	1.02254
1954	6		69.4	8.505	0.4		0.254	64	69.43	64.254	-7.41499	-3.31998	67.1249	1.00757
1954	7		70	9.45	7.3		4.6355	64	69.96	68.6355	-1.94929	-0.577354	69.5561	1.12951
1954	8		71.6	11.97	12.6		8.001	64	71.59	72.001	0.560056	0.206157	71.7376	1.2129
1954	9		70.9	10.8675	2.3		1.4605	64	70.83	65.4605	-7.67207	-4.35764	67.7435	1.04276
1954	10		72.7	13.7025	10.5		6.6675	64	72.64	70.6675	-2.79574	-2.47288	70.8437	1.18086
1954	11		71	11.025	13.4		8.509	64	70.97	72.509	2.12535	1.5749	72.0877	1.22477
1954	12		73.1	14.3325	11.3		7.1755	64	73.08	71.1755	-2.63269	-2.60011	71.1798	1.19322
1955	1		81.6	27.72	33.4		21.209	64	78.64	85.209	4.42279	4.55093	82.2189	1.46985
1955	2		80	25.2	29.9		18.9865	64	79.96	82.9865	3.73313	0.407924	80.2862	1.4334
1955	3		74	15.75	7.3		4.6355	64	71.01	68.6355	-7.24932	-2.04748	69.5561	1.12951
1955	4		77.9	21.8925	16.4		10.414	64	77.81	74.414	-4.47497	-5.60967	73.4451	1.26773
1955	5		84.7	32.6025	41.3		26.2255	64	84.62	90.2255	6.52361	2.53433	86.7645	1.54374
1955	6		91.7	43.6275	45.2		28.702	64	91.65	92.702	1.09269	-2.79593	89.0875	1.57633
1955	7		90.2	41.265	38.2		24.257	64	90.16	88.257	-2.1541	-5.77505	84.9532	1.51606
1955	8		93	45.675	58		36.83	64	92.91	100.83	8.41935	4.38805	96.9869	1.66779
1955	9		96.1	50.5575	60.8		38.608	64	96.09	102.608	6.77211	2.77759	98.759	1.68501
1955	10		111	74.025	83		52.705	64	110.98	116.705	5.13964	1.95021	113.144	1.79341
1955	11		127.2	99.54	126.3		80.2005	64	127.17	144.201	13.3652	11.4674	141.753	1.90925
1955	12		130.4	104.58	108.8		69.088	64	130.38	133.088	2.06135	-0.147206	130.188	1.87346
1956	1		136.6	114.345	104.1		66.1035	64	132.25	130.103	-4.75586	-3.91153	127.077	1.86164
1956	2		163.2	156.24	175.6		111.506	64	163.28	175.506	7.54044	6.52621	173.936	1.96444
1956	3		159	149.625	167.7		106.489	64	159.09	170.489	7.2261	6.1196	168.826	1.95868
1956	4		167.2	162.54	156.7		99.5045	64	161.04	163.505	-2.21023	0.397395	161.68	1.94907
1956	5		167	162.225	193.4		122.809	64	167.08	186.809	11.8617	10.9574	185.388	1.97464
1956	6		158.9	149.468	165.1		104.838	64	158.91	168.839	6.25456	5.17895	167.14	1.95658
1956	7		168.1	163.957	182.7		116.014	64	162.32	180.014	7.08775	9.97654	178.514	1.96892
1956	8		198.6	211.995	240.2		152.527	64	198.54	216.527	9.02669	8.36503	215.148	1.98958
1956	9		203.1	219.082	245.4		155.829	64	202.97	219.829	8.23683	7.61675	218.43	1.99056
1956	10		200.3	214.673	219.9		139.637	64	200.23	203.637	1.66575	1.03038	202.293	1.98467
1956	11		245	285.075	285		180.975	64	244.89	244.975	-0.0102041	-0.646453	243.307	1.99555
1956	12		245.8	286.335	272		172.72	64	245.76	236.72	-3.69406	-4.31327	235.16	1.9943
1957	1		223.8	251.685	233.7		148.399	64	216.64	212.399	-5.09406	-2.58508	211.04	1.98821
1957	2		182.2	186.165	184.5		117.157	64	182.26	181.157	-0.572173	-1.41977	179.672	1.96997
1957	3		195.8	207.585	222.8		141.478	64	195.86	205.478	4.9428	4.2245	204.134	1.98549
1957	4		201.4	216.405	248		157.48	64	201.46	221.48	9.97021	9.23712	220.069	1.99101
1957	5		213.2	234.99	233		147.955	64	213.23	211.955	-0.583959	-1.2349	210.597	1.98805
1957	6		260.2	309.015	284.3		180.531	64	260.18	244.531	-6.0221	-6.65362	242.869	1.99549
1957	7		225.2	253.89	265.1		168.339	64	225.12	232.339	3.16985	2.53568	230.828	1.99351
1957	8		207.3	225.698	223.7		142.049	64	207.25	206.049	-0.603232	-1.22793	204.705	1.98574
1957	9		269.9	324.292	334		212.09	64	269.82	276.09	2.29344	1.51153	273.898	1.99825
1957	10		281.2	342.09	359.4		228.219	64	281.09	292.219	3.91856	3.06571	289.707	1.99892
1957	11		253.5	298.462	298.6		189.611	64	253.48	253.611	0.043787	-0.657279	251.814	1.99656
1957	12		277.5	336.262	339		215.265	64	277.51	279.265	0.636036	-0.179308	277.012	1.99841
1958	1		243.4	282.555	286.7		182.054	64	243.45	246.054	1.09059	0.378363	244.371	1.99569
1958	2		207	225.225	233.6		148.336	64	207.06	212.336	2.57778	1.89144	210.976	1.98819
1958	3		249.2	291.69	270		171.45	64	249.19	235.45	-5.51766	-6.13396	233.905	1.99408
1958	4		247.5	289.012	277.6		176.276	64	247.54	240.276	-2.91879	-3.58273	238.671	1.99488
1958	5		223.5	251.213	248.2		157.607	64	223.46	221.607	-0.84698	-1.46104	220.195	1.99105
1958	6		227.5	257.512	242.9		154.242	64	227.44	218.242	-4.06967	-4.6551	216.852	1.9901
1958	7		231.4	263.655	271		172.085	64	231.35	236.085	2.02463	1.37554	234.532	1.99419
1958	8		242.9	281.767	283.5		180.023	64	242.81	244.023	0.462124	-0.182173	242.368	1.99542
1958	9		246.2	286.965	285.1		181.039	64	246.15	245.039	-0.471771	-1.12959	243.37	1.99556
1958	10		226.4	255.78	256.9		163.131	64	226.42	227.131	0.323101	-0.329632	225.674	1.99241
1958	11		204.6	221.445	215.6		136.906	64	204.58	200.906	-1.80547	-2.45363	199.56	1.98337
1958	12		230.8	262.71	265.7		168.719	64	230.81	232.719	0.831672	0.171216	231.205	1.99358
1959	1		265.7	317.677	307.7		195.389	64	265.73	259.389	-2.37505	-3.09778	257.498	1.99711
1959	2		202.8	218.61	202.6		128.651	64	202.91	192.651	-5.00444	-5.73422	191.275	1.97871
1959	3		227	256.725	263		167.005	64	226.98	231.005	1.76432	1.1142	229.509	1.99324
1959	4		212	233.1	231.3		146.876	64	212.03	210.876	-0.530425	-1.18332	209.521	1.98766
1959	5		217.5	241.762	243.6		154.686	64	217.45	218.686	0.545287	-0.0716578	217.294	1.99023
1959	6		224.4	252.63	238.9		151.702	64	224.38	215.702	-3.87634	-4.48042	214.327	1.98932
1959	7		209.7	229.477	211.9		134.556	64	209.64	198.556	-5.31402	-5.93119	197.206	1.98216
1959	8		240	277.2	282.6		179.451	64	239.95	243.451	1.43792	0.772672	241.804	1.99534
1959	9		196.5	208.688	205.6		130.556	64	196.53	194.556	-0.989313	-1.69944	193.19	1.97989
1959	10		164.2	157.815	157.7		100.139	64	164.14	164.139	-0.0368453	-1.10209	162.331	1.95003
1959	11		180.7	183.802	175.6		111.506	64	180.73	175.506	-2.87438	-3.7592	173.936	1.96444
1959	12		176.6	177.345	177.1		112.459	64	176.54	176.459	-0.0801246	-0.92652	174.904	1.96543
1960	1	1960	196.1	208.057	207.2	5	131.572	64	189.78	195.572	-0.26925	2.3347	194.211	1.98049
1960	2		166.6	161.595	149.9		95.1865	64	166.67	159.187	-4.44988	-5.65493	157.245	1.94205
1960	3		145.3	128.048	144.6		91.821	64	145.35	155.821	7.24088	5.79904	153.779	1.93591
1960	4		168.7	164.902	172.7		109.664	64	168.81	173.664	2.9428	1.92649	172.062	1.96242
1960	5		166.3	161.123	169.3		107.506	64	166.39	171.506	3.13019	2.08673	169.862	1.95991
1960	6		167	162.225	156		99.06	64	167.01	163.06	-2.35928	-3.46444	161.224	1.94839
1960	7		169.3	165.848	172.4		109.474	64	169.3	173.474	2.46545	1.51691	171.868	1.96221
1960	8		178.8	180.81	190		120.65	64	178.7	184.65	3.27181	2.52191	183.207	1.97295
1960	9		166.3	161.123	180.1		114.364	64	166.19	178.363	7.25406	6.40779	176.839	1.96735
1960	10		141.4	121.905	117.3		74.4855	64	141.32	138.486	-2.06117	-3.89835	135.811	1.89233
1960	11		145.7	128.677	126.9		80.5815	64	145.63	144.582	-0.767673	-2.39055	142.149	1.91028
1960	12		133.8	109.935	121.2		76.962	64	133.76	140.962	5.35277	3.45963	138.388	1.90002
1961	1		118.1	85.2075	82.1		52.1335	64	118.05	116.133	-1.66511	-4.65625	112.553	1.78984
1961	2		103.8	62.685	65.4		41.529	64	103.8	105.529	1.6657	-2.02673	101.696	1.71137
1961	3		103.8	62.685	75.2		47.752	64	103.79	111.752	7.66089	4.09339	108.039	1.7604
1961	4		105.8	65.835	86.9		55.1815	64	105.79	119.181	12.6479	9.37712	115.71	1.80816
1961	5		101.6	59.22	72.3		45.9105	64	101.55	109.91	8.17963	4.5315	106.152	1.74683
1961	6		113.4	77.805	109.5		69.5325	64	113.44	133.532	17.7535	15.1722	130.651	1.87513
1961	7		120.3	88.6725	99.3		63.0555	64	120.25	127.055	5.61554	3.0355	123.9	1.84843
1961	8		108.9	70.7175	79.2		50.292	64	108.86	114.292	4.95133	1.6461	110.652	1.77794
1961	9		114	78.75	90.1		57.2135	64	113.94	121.213	6.32763	3.40515	117.82	1.81948
1961	10		96.1	50.5575	53.7		34.0995	64	96.02	98.0995	2.08065	-1.79861	94.293	1.63951
1961	11		88.3	38.2725	46.5		29.5275	64	88.29	93.5275	5.92016	1.79159	89.8718	1.58667
1961	12		91.9	43.9425	56.9		36.1315	64	91.82	100.132	8.95702	4.87308	96.2945	1.66078
1962	1		91.9	43.9425	55.1		34.9885	64	88.82	98.9885	7.71328	7.14496	95.1662	1.64898
1962	2		99.7	56.2275	71.7		45.5295	64	99.76	109.53	9.85908	6.01675	105.762	1.74393
1962	3		99.4	55.755	64.9		41.2115	64	99.34	105.212	5.84658	2.04909	101.376	1.70861
1962	4		96.9	51.8175	65.9		41.8465	64	96.87	105.847	9.23271	5.31359	102.017	1.7141
1962	5		100.1	56.8575	61.9		39.3065	64	100.04	103.306	3.2033	-0.58118	99.4586	1.69152
1962	6		93.9	47.0925	59.6		37.846	64	93.85	101.846	8.46219	4.41976	97.9979	1.67774
1962	7		83.3	30.3975	31.4		19.939	64	80.42	83.939	0.767107	0.855102	81.1077	1.44932
1962	8		79.3	24.0975	31.5		20.0025	64	79.2	84.0025	5.93001	2.47829	81.1628	1.45036
1962	9		90.5	41.7375	72.7		46.1645	64	90.41	110.165	21.7287	17.6989	106.412	1.74875
1962	10		87.2	36.54	56.1		35.6235	64	87.18	99.6235	14.2471	9.87868	95.7922	1.65558
1962	11		83	29.925	38.8		24.638	64	82.96	88.638	6.79277	2.82206	85.3012	1.52155
1962	12		79.4	24.255	33.2		21.082	64	79.42	85.082	7.15617	3.38321	82.1069	1.46783
1963	1		77	20.475	28.7		18.2245	64	74.39	82.2245	6.78506	7.05296	79.6367	1.42033
1963	2		77.8	21.735	35.2		22.352	64	77.72	86.352	10.9923	7.0941	83.2335	1.48768
1963	3		77.1	20.6325	24.8		15.748	64	77.02	79.748	3.4345	0.722858	77.5767	1.37575
1963	4		80	25.2	41.7		26.4795	64	79.94	90.4795	13.0994	8.83241	87.0006	1.5472
1963	5		89.7	40.4775	61.1		38.7985	64	89.68	102.799	14.6026	10.3363	98.9496	1.6868
1963	6		86.2	34.965	51.2		32.512	64	86.16	96.512	11.9629	7.64162	92.744	1.62198
1963	7		78.4	22.68	28.7		18.2245	64	78.41	82.2245	4.87819	1.56446	79.6367	1.42033
1963	8		83	29.925	47.5		30.1625	64	82.9	94.1625	13.4488	9.14139	90.4782	1.59445
1963	9		86	34.65	55.2		35.052	64	85.98	99.052	15.1767	10.7568	95.2287	1.64964
1963	10		84.5	32.2875	50.1		31.8135	64	84.47	95.8135	13.3888	8.99364	92.0669	1.61399
1963	11		79.9	25.0425	33.7		21.3995	64	79.85	85.3995	6.88298	3.17724	82.387	1.47287
1963	12		76	18.9	21.6		13.716	64	75.96	77.716	2.25789	-0.0131976	75.95	1.33662
1964	1		73	14.175	22.6		14.351	64	70.63	78.351	7.33014	8.24267	76.4518	1.3491
1964	2		75	17.325	25.3		16.0655	64	74.92	80.0655	6.754	3.89252	77.8363	1.38165
1964	3		75.1	17.4825	24.1		15.3035	64	75.09	79.3035	5.5972	2.83096	77.2158	1.36739
1964	4		73.1	14.3325	12.9		8.1915	64	73.1	72.1915	-1.24282	-1.68498	71.8683	1.21737
1964	5		71	11.025	14.3		9.0805	64	71.02	73.0805	2.93028	2.06658	72.4877	1.23792
1964	6		71.2	11.34	13.5		8.5725	64	71.25	72.5725	1.92767	1.23766	72.1318	1.22625
1964	7		69.2	8.19	4.8		3.048	64	69.22	67.048	-3.10983	-0.870122	68.6177	1.08716
1964	8		71.1	11.1825	13.8		8.763	64	71	72.763	2.33896	1.78125	72.2647	1.23064
1964	9		70.9	10.8675	7		4.445	64	70.86	68.445	-3.46262	-2.00361	69.4402	1.12453
1964	10		72.9	14.0175	9.2		5.842	64	72.81	69.842	-4.19479	-3.43443	70.3094	1.16038
1964	11		72.1	12.7575	11.1		7.0485	64	72.06	71.0485	-1.45839	-1.33876	71.0953	1.19014
1964	12		76.4	19.53	22.1		14.0335	64	76.31	78.0335	2.13809	-0.143989	76.2001	1.34289
1965	1		76.1	19.0575	25.4		16.129	64	76.05	80.129	5.29435	2.41729	77.8884	1.38282
1965	2		73.4	14.805	20.8		13.208	64	73.36	77.208	5.18801	2.98934	75.553	1.32645
1965	3		73.4	14.805	17.5		11.1125	64	73.35	75.1125	2.33311	0.831052	73.9596	1.28287
1965	4		72.6	13.545	10.2		6.477	64	72.51	70.477	-2.92424	-2.4699	70.7191	1.17618
1965	5		80	25.2	34.5		21.9075	64	79.92	85.9075	7.38438	3.65033	82.8373	1.48082
1965	6		79.4	24.255	23.3		14.7955	64	79.41	78.7955	-0.761335	-3.27834	76.8067	1.3577
1965	7		76.8	20.16	17.3		10.9855	64	76.78	74.9855	-2.36263	-3.79605	73.8654	1.28014
1965	8		76.6	19.845	13.3		8.4455	64	76.55	72.4455	-5.42363	-5.88679	72.0437	1.2233
1965	9		77.4	21.105	24.5		15.5575	64	77.31	79.5575	2.78747	0.144481	77.4217	1.37218
1965	10		79.7	24.7275	29.1		18.4785	64	79.63	82.4785	3.4862	0.279301	79.8524	1.42472
1965	11		76	18.9	22.8		14.478	64	75.94	78.478	3.26053	0.807073	76.5529	1.35157
1965	12		75.2	17.64	24.7		15.6845	64	75.3	79.6845	5.96343	2.95486	77.525	1.37456
1966	1		85.1	33.2325	40.3		25.5905	64	85.08	89.5905	5.27673	1.28896	86.1767	1.53499
1966	2		82.1	28.5075	35.3		22.4155	64	82.19	86.4155	5.25639	1.33872	83.2903	1.48865
1966	3		89.4	40.005	36.4		23.114	64	89.42	87.114	-2.55705	-6.15381	83.9173	1.49923
1966	4		97.8	53.235	69		43.815	64	97.84	107.815	10.2403	6.31063	104.014	1.73045
1966	5		100.8	57.96	64.2		40.767	64	100.75	104.767	3.93552	0.175835	100.927	1.70471
1966	6		99.4	55.755	67.7		42.9895	64	99.35	106.989	7.63531	3.85051	103.175	1.72371
1966	7		110.2	72.765	80.2		50.927	64	110.13	114.927	4.28947	1.06874	111.307	1.78212
1966	8		109.2	71.19	72.6		46.101	64	109.21	110.101	0.825092	-2.62194	106.347	1.74827
1966	9		112	75.6	71.1		45.1485	64	112.02	109.148	-2.54598	-5.93356	105.373	1.74099
1966	10		107.9	69.1425	81.2		51.562	64	107.86	115.562	7.10102	3.80372	111.963	1.78622
1966	11		110.8	73.71	81		51.435	64	110.83	115.435	4.18321	0.90364	111.832	1.7854
1966	12		120.7	89.3025	99.8		63.373	64	120.69	127.373	5.52858	2.93399	124.231	1.84986
1967	1		143	124.425	157		99.695	64	143.04	163.695	14.472	13.1679	161.875	1.94936
1967	2		143.4	125.055	132.6		84.201	64	143.49	148.201	3.34798	1.6814	145.903	1.91949
1967	3		159	149.625	158.3		100.521	64	158.95	164.521	3.47201	2.37278	162.722	1.95059
1967	4		130.8	105.21	98.4		62.484	64	130.78	126.484	-3.29969	-5.71591	123.305	1.84581
1967	5		146.3	129.623	122.5		77.7875	64	146.24	141.787	-3.08442	-4.78259	139.246	1.90246
1967	6		124	94.5	95.4		60.579	64	124.01	124.579	0.466935	-2.16865	121.321	1.83677
1967	7		144.9	127.418	129.5		82.2325	64	144.88	146.233	0.9196	-0.7027	143.862	1.91461
1967	8		157.6	147.42	151.8		96.393	64	157.55	160.393	1.77221	0.593768	158.485	1.9441
1967	9		133.5	109.462	108.7		69.0245	64	133.5	133.024	-0.35618	-2.53042	130.122	1.87322
1967	10		135.1	111.982	125		79.375	64	135.15	143.375	6.12509	4.25134	140.896	1.90699
1967	11		142.1	123.007	133.6		84.836	64	142.1	148.836	4.74032	3.13894	146.56	1.92101
1967	12		157.9	147.893	179		113.665	64	157.94	177.665	12.5174	11.517	176.13	1.96666
1968	1		183.1	187.582	172.5		109.538	64	183.07	173.538	-5.22256	-6.08358	171.933	1.96228
1968	2		168.9	165.218	158.5		100.648	64	168.96	164.648	-2.51776	-3.61524	162.852	1.95078
1968	3		141.2	121.59	130.5		82.8675	64	141.26	146.868	4.01381	2.30814	144.52	1.91621
1968	4		130.4	104.58	115		73.025	64	130.42	137.025	5.08052	2.96747	134.29	1.88752
1968	5		158.4	148.68	180		114.3	64	158.41	178.3	12.5631	11.5931	176.775	1.96729
1968	6		146.8	130.41	156.2		99.187	64	146.81	163.187	11.1628	9.9069	161.354	1.94858
1968	7		141.7	122.377	136.2		86.487	64	141.63	150.487	6.20113	4.68794	148.27	1.92481
1968	8		145.7	128.677	154.8		98.298	64	145.7	162.298	11.3919	10.1181	160.442	1.9472
1968	9		142.5	123.638	166		105.41	64	142.38	169.41	18.8842	17.8	167.724	1.95732
1968	10		151.4	137.655	152.5		96.8375	64	151.36	160.838	6.23349	5.00943	158.942	1.94484
1968	11		135.5	112.612	121.7		77.2795	64	135.49	141.279	4.26531	2.3823	138.718	1.90097
1968	12		143.8	125.685	155.5		98.7425	64	143.79	162.743	13.1728	11.8981	160.898	1.9479
1969	1		147.8	131.985	147.8		93.853	64	147.77	157.853	6.80176	5.48322	155.873	1.93969
1969	2		151.5	137.812	170.5		108.267	64	151.56	172.267	13.7079	12.5884	170.639	1.96082
1969	3		170.6	167.895	192.3		122.111	64	170.65	186.111	9.09174	8.22286	184.682	1.9741
1969	4		156.5	145.688	151.1		95.9485	64	156.56	159.948	2.20351	0.938014	158.029	1.94335
1969	5		148.7	133.402	169.9		107.886	64	148.71	171.887	15.5928	14.485	170.251	1.96037
1969	6		167.3	162.698	150.1		95.3135	64	167.28	159.314	-4.77376	-5.92088	157.376	1.94227
1969	7		141.1	121.432	137.1		87.0585	64	141.07	151.058	7.05776	5.5226	148.861	1.92609
1969	8		146.6	130.095	138.8		88.138	64	146.57	152.138	3.77763	2.32439	149.977	1.92844
1969	9		138.7	117.652	129.3		82.1055	64	138.72	146.106	5.33922	3.61173	143.73	1.91428
1969	10		152.9	140.018	135.4		85.979	64	152.89	149.979	-1.9104	-3.36592	147.744	1.92366
1969	11		153.2	140.49	132.4		84.074	64	153.17	148.074	-3.34595	-4.83055	145.771	1.91919
1969	12		139.1	118.282	138.6		88.011	64	139.13	152.011	9.28181	7.70185	149.846	1.92817
1970	1	1970	153.2	140.49	157.9	5	100.267	64	153.24	164.267	7.22356	6.0175	162.461	1.95022
1970	2		171.2	168.84	180.8		114.808	64	171.28	178.808	4.44393	3.50899	177.29	1.96778
1970	3		156.8	146.16	145.7		92.5195	64	156.76	156.519	-0.17889	-1.44238	154.499	1.93723
1970	4		163.1	156.082	155.1		98.4885	64	163.06	162.488	-0.374923	-1.48556	160.638	1.9475
1970	5		172.2	170.415	180.5		114.618	64	172.15	178.618	3.72677	2.87359	177.097	1.9676
1970	6		159.9	151.043	151.3		96.0755	64	159.86	160.076	0.109756	-1.06398	158.159	1.94357
1970	7		157	146.475	159.3		101.156	64	156.96	165.156	5.19459	4.08521	163.372	1.95152
1970	8		141.6	122.22	131.7		83.6295	64	141.62	147.63	4.25812	2.60586	145.31	1.9181
1970	9		144.8	127.26	140.8		89.408	64	144.76	153.408	5.94475	4.51019	151.289	1.93111
1970	10		147.3	131.198	122.6		77.851	64	147.25	141.851	-3.69925	-5.39086	139.312	1.90265
1970	11		158.5	148.838	134.8		85.598	64	158.49	149.598	-5.6164	-7.02917	147.349	1.92279
1970	12		148	132.3	118.2		75.057	64	147.99	139.057	-6.04257	-7.82775	136.406	1.89416
1971	1		157.4	147.105	129.2		82.042	64	157.41	146.042	-7.21601	-8.73241	143.664	1.91412
1971	2		134.4	110.88	111.8		70.993	64	134.46	134.993	0.44122	-1.7006	132.173	1.88047
1971	3		110.8	73.71	85.9		54.5465	64	110.77	118.547	6.99143	3.86525	115.052	1.80448
1971	4		117.5	84.2625	101.6		64.516	64	117.48	128.516	9.37532	6.7605	125.422	1.85491
1971	5		112.4	76.23	81.5		51.7525	64	112.33	115.752	2.98265	-0.15178	112.16	1.78743
1971	6		104.9	64.4175	70.7		44.8945	64	104.88	108.894	3.80791	0.223146	105.114	1.73902
1971	7		121.2	90.09	114.7		72.8345	64	121.19	136.834	12.8998	10.6459	134.092	1.88688
1971	8		116.9	83.3175	87		55.245	64	116.9	119.245	2.00599	-0.961566	115.776	1.80853
1971	9		105.1	64.7325	71.3		45.2755	64	105.13	109.275	3.97288	0.354685	105.503	1.74198
1971	10		106.4	66.78	73.4		46.609	64	106.46	110.609	3.95583	0.381881	106.867	1.75207
1971	11		111.5	74.8125	89.5		56.8325	64	111.51	120.833	8.36996	5.30354	117.424	1.81741
1971	12		120.7	89.3025	116.5		73.9775	64	120.64	137.978	14.3144	12.1369	135.282	1.89068
1972	1		111.1	74.1825	87		55.245	64	111.12	119.245	7.33123	4.19	115.776	1.80853
1972	2		138.4	117.18	125.3		79.5655	64	138.45	143.565	3.7323	1.90941	141.094	1.90751
1972	3		127.1	99.3825	113.5		72.0725	64	127.17	136.072	7.0594	4.81879	133.298	1.88427
1972	4		113.7	78.2775	89.6		56.896	64	113.71	120.896	6.32894	3.3242	117.49	1.81775
1972	5		132.5	107.888	113.9		72.3265	64	132.53	136.327	2.88792	0.779179	133.563	1.88515
1972	6		139.7	119.227	124.7		79.1845	64	139.73	143.185	2.49427	0.692611	140.698	1.90645
1972	7		126	97.65	108.3		68.7705	64	126	132.77	5.37341	3.06122	129.857	1.87225
1972	8		128.9	102.218	108.9		69.1515	64	128.83	133.151	3.29829	1.10553	130.254	1.8737
1972	9		114.9	80.1675	90.7		57.5945	64	114.83	121.595	5.82637	2.94852	118.216	1.82152
1972	10		120.2	88.515	86.9		55.1815	64	120.2	119.181	-0.847338	-3.73539	115.71	1.80816
1972	11		99.4	55.755	59.2		37.592	64	99.39	101.592	2.20523	-1.65531	97.7448	1.67528
1972	12		99.7	56.2275	64.3		40.8305	64	99.67	104.831	5.14594	1.32555	100.991	1.70527
1973	1		99	55.125	61.8		39.243	64	98.96	103.243	4.28586	0.439482	99.3949	1.69093
1973	2		96.3	50.8725	60.9		38.6715	64	96.3	102.672	6.6163	2.61943	98.8225	1.6856
1973	3		99.4	55.755	65.4		41.529	64	99.38	105.529	6.166	2.33071	101.696	1.71137
1973	4		105.8	65.835	81.8		51.943	64	105.77	115.943	9.58696	6.22707	112.356	1.78864
1973	5		99.1	55.2825	60.3		38.2905	64	99.15	102.291	3.21948	-0.71447	98.4416	1.682
1973	6		94.2	47.565	56.1		35.6235	64	94.15	99.6235	5.75743	1.74427	95.7922	1.65558
1973	7		87.2	36.54	33.2		21.082	64	87.23	85.082	-2.4289	-5.87304	82.1069	1.46783
1973	8		84.9	32.9175	36.6		23.241	64	84.93	87.241	2.75736	-1.05762	84.0318	1.50113
1973	9		106.8	67.41	84.1		53.4035	64	106.76	117.403	9.92837	6.65726	113.867	1.79768
1973	10		87.1	36.3825	43.7		27.7495	64	87.14	91.7495	5.33812	1.20336	88.1886	1.56408
1973	11		79.7	24.7275	34.3		21.7805	64	79.71	85.7805	7.62923	3.78185	82.7245	1.47884
1973	12		81.5	27.5625	33.3		21.1455	64	81.54	85.1455	4.47301	0.763894	82.1629	1.46884
1974	1		80.4	25.83	39.4		25.019	64	80.44	89.019	10.7201	6.47741	85.6504	1.52697
1974	2		78.9	23.4675	37.3		23.6855	64	78.9	87.6855	11.135	7.01359	84.4337	1.50772
1974	3		78.4	22.68	30.9		19.6215	64	78.42	83.6215	6.66008	3.07661	80.8327	1.44406
1974	4		86.7	35.7525	57.5		36.5125	64	86.69	100.513	15.9314	11.5145	96.6719	1.66462
1974	5		92.6	45.045	56.3		35.7505	64	92.58	99.7505	7.72192	3.60518	95.9177	1.65689
1974	6		89	39.375	51.5		32.7025	64	88.98	96.7025	8.65449	4.43826	92.9292	1.62413
1974	7		95.5	49.6125	79.1		50.2285	64	95.51	114.228	19.611	15.7852	110.586	1.77752
1974	8		85.1	33.2325	47.9		30.4165	64	85.08	94.4165	10.9477	6.63084	90.7215	1.59752
1974	9		88.7	38.9025	57.2		36.322	64	88.71	100.322	13.1026	8.76237	96.4831	1.66271
1974	10		97.1	52.1325	67.2		42.672	64	97.07	106.672	9.85788	5.95793	102.853	1.72107
1974	11		88.3	38.2725	35.9		22.7965	64	88.31	86.7965	-1.70272	-5.2976	83.6317	1.49445
1974	12		78.6	22.995	29.6		18.796	64	78.58	82.796	5.33842	1.96379	80.1231	1.43016
1975	1		75	17.325	27.3		17.3355	64	75.02	81.3355	8.44733	5.156	78.888	1.40471
1975	2		72.4	13.23	16.7		10.6045	64	72.38	74.6045	3.04489	1.66422	73.5846	1.27189
1975	3		71.7	12.1275	16.9		10.7315	64	71.64	74.7315	4.22803	2.84462	73.6779	1.27465
1975	4		71.2	11.34	7.7		4.8895	64	71.23	68.8895	-3.24508	-2.1313	69.7119	1.1361
1975	5		71.6	11.97	13.1		8.3185	64	71.61	72.3185	1.00349	0.482906	71.9558	1.22034
1975	6		71.9	12.4425	16.7		10.6045	64	71.91	74.6045	3.76147	2.32869	73.5846	1.27189
1975	7		79.7	24.7275	40.4		25.654	64	79.71	89.654	12.4893	8.18629	86.2353	1.53587
1975	8		92.7	45.2025	56.7		36.0045	64	92.69	100.005	7.87972	3.75315	96.1688	1.65949
1975	9		80.4	25.83	20.3		12.8905	64	80.43	76.8905	-4.36505	-6.36961	75.3069	1.32003
1975	10		75.3	17.7975	13.6		8.636	64	75.27	72.636	-3.53785	-4.11048	72.176	1.22771
1975	11		79.1	23.7825	27.9		17.7165	64	79.08	81.7165	3.30784	0.161437	79.2077	1.41145
1975	12		72.3	13.0725	11.6		7.366	64	72.28	71.366	-1.29184	-1.34574	71.3073	1.1978
1976	1		72.4	13.23	11.9		7.5565	64	72.35	71.5565	-1.16506	-1.26398	71.4355	1.20236
1976	2		68.8	7.56	6.4		4.064	64	68.86	68.064	-1.06977	0.509967	69.2112	1.1145
1976	3		75.9	18.7425	31.5		20.0025	64	75.95	84.0025	10.6752	6.86348	81.1628	1.45036
1976	4		76.8	20.16	27.3		17.3355	64	76.84	81.3355	5.9056	2.66531	78.888	1.40471
1976	5		72.2	12.915	18.2		11.557	64	72.22	75.557	4.64958	2.8682	74.2914	1.29235
1976	6		72.8	13.86	17.9		11.3665	64	72.81	75.3665	3.52541	1.83873	74.1488	1.2883
1976	7		69.8	9.135	2.9		1.8415	64	69.76	65.8415	-5.6712	-2.59863	67.9472	1.05361
1976	8		76.6	19.845	24.1		15.3035	64	76.62	79.3035	3.52937	0.777558	77.2158	1.36739
1976	9		73.9	15.5925	20		12.7	64	73.85	76.7	3.7889	1.77395	75.1601	1.31614
1976	10		75.4	17.955	29.7		18.8595	64	75.39	82.8595	9.89324	6.35024	80.1774	1.43124
1976	11		71.3	11.4975	7.9		5.0165	64	71.27	69.0165	-3.20266	-2.07614	69.7903	1.13938
1976	12		74.3	16.2225	22.3		14.1605	64	74.32	78.1605	5.19583	2.66498	76.3006	1.34538
1977	1		74.9	17.1675	23.8		15.113	64	74.96	79.113	5.62483	2.80405	77.0619	1.36377
1977	2		80.3	25.6725	33.3		21.1455	64	80.31	85.1455	6.03425	2.30716	82.1629	1.46884
1977	3		75.8	18.585	13		8.255	64	75.79	72.255	-4.67678	-5.11677	71.912	1.21886
1977	4		78.2	22.365	19		12.065	64	78.17	76.065	-2.73018	-4.47129	74.6748	1.30302
1977	5		81.4	27.405	27		17.145	64	81.43	81.145	-0.313268	-3.31707	78.7289	1.4013
1977	6		94.5	48.0375	54.9		34.8615	64	94.44	98.8615	4.61534	0.636567	95.0412	1.64764
1977	7		83.7	31.0275	30.6		19.431	64	83.7	83.431	-0.321386	-3.62218	80.6682	1.44088
1977	8		86.4	35.28	43		27.305	64	86.34	91.305	5.67708	1.65787	87.7714	1.55825
1977	9		100.9	58.1175	62.4		39.624	64	101.22	103.624	2.6997	-1.42542	99.7772	1.69444
1977	10		96.3	50.8725	62.1		39.4335	64	96.3	103.434	7.40758	3.41224	99.586	1.69269
1977	11		91.6	43.47	41.6		26.416	64	91.65	90.416	-1.29258	-5.13742	86.9416	1.54634
1977	12		98.9	54.9675	61.4		38.989	64	98.9	102.989	4.13448	0.243029	99.1404	1.68858
1978	1		106.1	66.3075	73.7		46.7995	64	106.1	110.799	4.42931	0.906399	107.062	1.75348
1978	2		141.8	122.535	132.6		84.201	64	141.91	148.201	4.5141	2.8135	145.903	1.91949
1978	3		140.3	120.173	108.4		68.834	64	140.27	132.834	-5.32145	-7.37626	129.923	1.8725
1978	4		150.5	136.237	141.2		89.662	64	150.48	153.662	2.101	0.711885	151.551	1.93163
1978	5		149.7	134.977	117.1		74.3585	64	149.73	138.358	-7.57615	-9.38446	135.679	1.89192
1978	6		146.8	130.41	134.6		85.471	64	146.73	149.471	1.81948	0.332573	147.218	1.92249
1978	7		135.4	112.455	99.7		63.3095	64	135.38	127.309	-5.97526	-8.28419	124.165	1.84958
1978	8		116.9	83.3175	82.4		52.324	64	116.89	116.324	-0.492729	-3.54157	112.75	1.79104
1978	9		159.6	150.57	195.7		124.269	64	159.59	188.269	17.9633	17.0883	186.861	1.97572
1978	10		157.1	146.632	177.1		112.459	64	157.15	176.459	12.3224	11.2977	174.904	1.96543
1978	11		148.2	132.615	138.5		87.9475	64	148.27	151.947	2.52868	1.01838	149.78	1.92803
1978	12		170	166.95	173.9		110.427	64	170.04	174.427	2.60382	1.64538	172.838	1.96327
1979	1		196.5	208.688	235.9		149.797	64	196.53	213.797	8.80229	8.09084	212.431	1.98869
1979	2		199.1	212.782	194.7		123.634	64	199.17	187.635	-5.75866	-6.50162	186.221	1.97526
1979	3		184	189	195.3		124.016	64	183.95	188.016	2.18234	1.44338	186.605	1.97554
1979	4		175	174.825	143.7		91.2495	64	174.95	155.25	-11.286	-12.4381	153.19	1.9348
1979	5		168.9	165.218	190.3		120.841	64	168.83	184.841	9.43783	8.62951	183.399	1.9731
1979	6		186	192.15	211.7		134.429	64	185.96	198.429	6.68253	5.97898	197.079	1.98209
1979	7		171.4	169.155	225.7		143.32	64	171.39	207.32	20.9565	20.1782	205.973	1.98627
1979	8		177	177.975	201.4		127.889	64	176.96	191.889	8.41186	7.65595	190.508	1.97822
1979	9		202.3	217.823	266.9		169.481	64	202.29	233.481	15.4135	14.6665	231.959	1.99372
1979	10		216.4	240.03	263.6		167.386	64	216.47	231.386	6.92514	6.19763	229.886	1.99332
1979	11		226.8	256.41	259.5		164.782	64	226.86	228.782	0.874118	0.197899	227.309	1.99278
1979	12		197.2	209.79	249.6		158.496	64	197.22	222.496	12.8276	12.0969	221.077	1.99128
1980	1	1980	199.6	213.57	226.1	5	143.573	64	199.56	207.573	3.99474	3.34088	206.227	1.98638
1980	2		195.1	206.482	219.4		139.319	64	195.09	203.319	4.21271	3.52943	201.976	1.98453
1980	3		166.5	161.438	178.7		113.474	64	166.47	177.474	6.59129	5.68662	175.937	1.96647
1980	4		209.3	228.848	232.2		147.447	64	209.41	211.447	1.0258	0.325018	210.091	1.98787
1980	5		229.1	260.032	254.7		161.734	64	229.15	225.734	-1.46901	-2.12121	224.289	1.99209
1980	6		199.3	213.098	222.7		141.415	64	199.32	205.415	3.06799	2.38343	204.071	1.98547
1980	7		190.8	199.71	192.9		122.492	64	190.82	186.492	-2.25812	-3.01486	185.067	1.9744
1980	8		170.3	167.423	191.7		121.73	64	170.28	185.73	9.06019	8.23202	184.297	1.97381
1980	9		185.9	191.993	219.6		139.446	64	185.81	203.446	9.43841	8.76842	202.103	1.98458
1980	10		202.9	218.768	233.3		148.145	64	202.84	212.145	4.55668	3.91768	210.787	1.98812
1980	11		213.4	235.305	209.5		133.032	64	213.39	197.032	-7.66987	-8.30073	195.677	1.98132
1980	12		218.8	243.81	246.9		156.781	64	220.31	220.781	0.905622	-0.424115	219.376	1.99082
1981	1		169	165.375	156.6		99.441	64	169.03	163.441	-3.28935	-4.38689	161.615	1.94897
1981	2		199.5	213.412	189.9		120.587	64	199.65	184.587	-7.47544	-8.26824	183.142	1.9729
1981	3		203.2	219.24	196.6		124.841	64	203.22	188.841	-7.06644	-7.76616	187.438	1.97614
1981	4		224.7	253.102	225.3		143.066	64	224.74	207.066	-7.84802	-8.46317	205.72	1.98617
1981	5		198.9	212.468	194.7		123.634	64	198.94	187.635	-5.6639	-6.39353	186.221	1.97526
1981	6		161.9	154.192	131.6		83.566	64	161.86	147.566	-8.85361	-10.2653	145.245	1.91795
1981	7		198.2	211.365	205.3		130.365	64	198.18	194.365	-1.93466	-2.61447	192.999	1.97977
1981	8		226	255.15	242.5		153.988	64	225.94	217.988	-3.54535	-4.13384	216.6	1.99002
1981	9		221.9	248.692	245.3		155.766	64	221.89	219.766	-0.96192	-1.58788	218.367	1.99054
1981	10		222.8	250.11	216.2		137.287	64	222.81	201.287	-9.65575	-10.2635	199.942	1.98356
1981	11		203.3	219.398	186		118.11	64	203.33	182.11	-10.423	-11.1607	180.637	1.97081
1981	12		201.4	216.405	195.4		124.079	64	201.36	188.079	-6.6142	-7.29581	186.669	1.97559
1982	1		173.4	172.305	149.8		95.123	64	173.37	159.123	-8.23356	-9.33864	157.18	1.94194
1982	2		208.9	228.218	230.9		146.621	64	209	210.621	0.824079	0.128129	209.268	1.98756
1982	3		208.3	227.273	221.1		140.398	64	208.3	204.398	-1.87302	-2.51795	203.055	1.98502
1982	4		162.9	155.768	170.3		108.141	64	162.95	172.141	5.6725	4.63916	170.51	1.96067
1982	5		147.9	132.143	119.3		75.7555	64	147.89	139.755	-5.50676	-7.27394	137.133	1.89635
1982	6		177.4	178.605	163.7		103.95	64	177.35	167.95	-5.32723	-6.26935	166.231	1.95541
1982	7		164.8	158.76	139.4		88.519	64	164.81	152.519	-7.45206	-8.76124	150.371	1.92925
1982	8		172.1	170.257	161.9		102.806	64	172.06	166.806	-3.07583	-4.06699	165.062	1.95386
1982	9		167.1	162.382	167.4		106.299	64	167.03	170.299	1.91442	0.958659	168.631	1.95844
1982	10		160.9	152.618	134.3		85.2805	64	160.86	149.281	-7.22157	-8.60329	147.021	1.92205
1982	11		163.7	157.027	127.5		80.9625	64	163.68	144.963	-11.4462	-12.9129	142.544	1.9113
1982	12		193.2	203.49	169		107.315	64	193.17	171.315	-11.3276	-12.1666	169.668	1.95968
1983	1		137.7	116.077	115.5		73.3425	64	137.75	137.343	-0.259622	-2.27164	134.621	1.88859
1983	2		119.6	87.57	73.1		46.4185	64	119.63	110.418	-7.67684	-10.8322	106.671	1.75065
1983	3		117.3	83.9475	88.7		56.3245	64	117.29	120.325	2.57843	-0.335609	116.896	1.81461
1983	4		119.9	88.0425	109.6		69.596	64	119.85	133.596	11.4229	9.06762	130.718	1.87537
1983	5		140.2	120.015	132.5		84.1375	64	140.11	148.137	5.66155	4.08739	145.837	1.91934
1983	6		143	124.425	131.5		83.5025	64	143	147.502	3.1486	1.52362	145.179	1.91779
1983	7		129.1	102.532	108.9		69.1515	64	129.1	133.151	3.13826	0.894081	130.254	1.8737
1983	8		127.5	100.013	96		60.96	64	127.54	124.96	-1.99216	-4.56534	121.717	1.83862
1983	9		110.2	72.765	69.9		44.3865	64	110.2	108.387	-1.64564	-5.08517	104.596	1.73502
1983	10		111.8	75.285	72.5		46.0375	64	111.78	110.037	-1.57648	-4.91893	106.282	1.74779
1983	11		90.4	41.58	45.7		29.0195	64	90.45	93.0195	2.89768	-1.17345	89.3886	1.58034
1983	12		90.5	41.7375	45.6		28.956	64	90.53	92.956	2.71381	-1.32736	89.3283	1.57954
1984	1		112.4	76.23	74.8		47.498	64	112.43	111.498	-0.802491	-4.13781	107.778	1.75858
1984	2		137.2	115.29	110.2		69.977	64	137.2	133.977	-2.34913	-4.4354	131.115	1.87678
1984	3		120.8	89.46	116.7		74.1045	64	120.86	138.105	14.3249	12.0422	135.414	1.8911
1984	4		129.7	103.477	90.4		57.404	64	129.7	121.404	-6.3963	-9.0071	118.018	1.8205
1984	5		131.1	105.682	96.9		61.5315	64	131.15	125.531	-4.24752	-6.73845	122.313	1.84136
1984	6		103.5	62.2125	65.1		41.3385	64	103.45	105.338	1.77633	-1.88129	101.504	1.70972
1984	7		92.2	44.415	55.7		35.3695	64	92.18	99.3695	7.77603	3.64674	95.5416	1.65295
1984	8		85.8	34.335	35		22.225	64	85.73	86.225	0.495338	-3.04429	83.1201	1.48573
1984	9		78.9	23.4675	22.6		14.351	64	78.91	78.351	-0.695817	-3.1152	76.4518	1.3491
1984	10		73.1	14.3325	12.6		8.001	64	73.05	72.001	-1.50342	-1.79659	71.7376	1.2129
1984	11		74.6	16.695	26.5		16.8275	64	74.58	80.8275	8.34786	5.20885	78.4648	1.39559
1984	12		73.5	14.9625	21.4		13.589	64	73.48	77.589	5.56327	3.22584	75.8503	1.33409
1985	1		72.1	12.7575	17.8		11.303	64	72.09	75.303	4.44244	2.79009	74.1014	1.28695
1985	2		71.9	12.4425	20.7		13.1445	64	71.89	77.1445	7.29416	5.02662	75.5036	1.32517
1985	3		72.5	13.3875	16.9		10.7315	64	72.54	74.7315	3.07793	1.56863	73.6779	1.27465
1985	4		75.7	18.4275	20.4		12.954	64	75.71	76.954	1.65654	-0.467569	75.356	1.32132
1985	5		82	28.35	32.4		20.574	64	82.02	84.574	3.13902	-0.437625	81.6611	1.45968
1985	6		78.5	22.8375	28.3		17.9705	64	78.48	81.9705	4.42102	1.20002	79.4218	1.41591
1985	7		81.3	27.2475	39.9		25.3365	64	81.28	89.3365	9.88499	5.73626	85.9424	1.53144
1985	8		73.3	14.6475	10.1		6.4135	64	73.25	70.4135	-3.93793	-3.51166	70.6777	1.17461
1985	9		70.2	9.765	4.3		2.7305	64	70.22	66.7305	-4.94231	-2.53834	68.4376	1.07845
1985	10		74.2	16.065	22		13.97	64	74.17	77.97	5.08086	2.6695	76.15	1.34164
1985	11		72.6	13.545	17.9		11.3665	64	72.61	75.3665	3.81061	2.11924	74.1488	1.2883
1985	12		72.4	13.23	15.8		10.033	64	72.43	74.033	2.25552	1.01919	73.1682	1.25933
1986	1		70.9	10.8675	2.8		1.778	64	70.91	65.778	-7.22426	-4.22653	67.913	1.05181
1986	2		80.9	26.6175	27.9		17.7165	64	81.54	81.7165	1.00927	-2.86036	79.2077	1.41145
1986	3		76.2	19.215	13.8		8.763	64	76.21	72.763	-4.5105	-5.17689	72.2647	1.23064
1986	4		75.6	18.27	22.4		14.224	64	75.6	78.224	3.4709	0.993314	76.3509	1.34662
1986	5		74.2	16.065	16.1		10.2235	64	74.23	74.2235	0.0316712	-1.24434	73.3063	1.26354
1986	6		69.7	8.9775	0.6		0.381	64	69.73	64.381	-7.63128	-3.64533	67.1881	1.01134
1986	7		72.5	13.3875	18.1		11.4935	64	72.51	75.4935	4.12897	2.39112	74.2438	1.291
1986	8		70.1	9.6075	9.9		6.2865	64	70.07	70.2865	0.266049	0.749587	70.5952	1.17147
1986	9		69.4	8.505	5.1		3.2385	64	69.45	67.2385	-3.11455	-1.04102	68.727	1.09235
1986	10		82.4	28.98	40.1		25.4635	64	82.38	89.4635	8.57221	4.46647	86.0595	1.53322
1986	11		75.5	18.1125	15.4		9.779	64	75.48	73.779	-2.27947	-3.30542	72.9851	1.25368
1986	12		70.4	10.08	5.8		3.683	64	70.36	67.683	-3.85938	-1.95337	68.9856	1.10435
1987	1		70.2	9.765	9.8		6.223	64	70.19	70.223	0.0327635	0.518782	70.5541	1.16989
1987	2		69.8	9.135	3.4		2.159	64	69.79	66.159	-5.21633	-2.39299	68.1199	1.06256
1987	3		73.3	14.6475	17.4		11.049	64	73.25	75.049	2.38608	0.904371	73.9125	1.28151
1987	4		85.5	33.8625	46		29.21	64	85.49	93.21	9.01754	4.77202	89.5696	1.58272
1987	5		89.8	40.635	39.1		24.8285	64	89.73	88.8285	-1.08185	-4.74128	85.4756	1.52427
1987	6		80.4	25.83	18.8		11.938	64	80.41	75.938	-5.54975	-7.25216	74.5785	1.30037
1987	7		87	36.225	38.2		24.257	64	87	88.257	1.44483	-2.35263	84.9532	1.51606
1987	8		92.2	44.415	47.9		30.4165	64	92.22	94.4165	2.40401	-1.6249	90.7215	1.59752
1987	9		87	36.225	42.2		26.797	64	87.03	90.797	4.36437	0.306158	87.2964	1.55148
1987	10		97.4	52.605	63.4		40.259	64	97.48	104.259	7.04209	3.01138	100.415	1.70019
1987	11		99	55.125	48.8		30.988	64	99.03	94.988	-4.05253	-7.83555	91.2705	1.60434
1987	12		91.5	43.3125	29.1		18.4785	64	91.46	82.4785	-9.85956	-12.6914	79.8524	1.42472
1988	1		104.6	63.945	70.5		44.7675	64	104.56	108.767	3.98423	0.405988	104.985	1.73802
1988	2		102.4	60.48	45.4		28.829	64	102.43	92.829	-9.34668	-12.9084	89.2079	1.57794
1988	3		113.8	78.435	91.2		57.912	64	113.84	121.912	7.1283	4.13372	118.546	1.82321
1988	4		123.6	93.87	108.8		69.088	64	123.55	133.088	7.67638	5.37278	130.188	1.87346
1988	5		117.9	84.8925	74.2		47.117	64	117.85	111.117	-5.75318	-8.87816	107.387	1.75581
1988	6		143.8	125.685	124.3		78.9305	64	143.81	142.93	-0.604659	-2.34762	140.434	1.90574
1988	7		157.6	147.42	131.4		83.439	64	157.65	147.439	-6.44734	-7.95245	145.113	1.91764
1988	8		158	148.05	139.4		88.519	64	158.04	152.519	-3.46899	-4.85282	150.371	1.92925
1988	9		154.1	141.907	142.7		90.6145	64	154.11	154.614	0.333874	-1.02236	152.534	1.93355
1988	10		168.7	164.902	156.5		99.3775	64	168.72	163.377	-3.15501	-4.24981	161.55	1.94888
1988	11		152.8	139.86	156.8		99.568	64	152.77	163.568	7.04712	5.8749	161.745	1.94917
1988	12		193.5	203.963	231.2		146.812	64	193.51	210.812	8.94677	8.24128	209.458	1.98763
1989	1		227.8	257.985	210.1		133.413	64	227.84	197.413	-13.3391	-13.9487	196.059	1.98154
1989	2		217	240.975	208.7		132.524	64	216.96	196.524	-9.43571	-10.0446	195.167	1.98104
1989	3		203	218.925	170.4		108.204	64	203.02	172.204	-15.1704	-15.9816	170.574	1.96074
1989	4		190.9	199.868	166.3		105.601	64	190.93	169.601	-11.1574	-12.0525	167.918	1.95756
1989	5		194.4	205.38	195.4		124.079	64	194.4	188.079	-3.25154	-3.97678	186.669	1.97559
1989	6		247.2	288.54	284.5		180.657	64	247.2	244.657	-1.02852	-1.70152	242.994	1.99551
1989	7		187.8	194.985	180.5		114.618	64	187.81	178.618	-4.88951	-5.70423	177.097	1.9676
1989	8		222.5	249.637	232		147.32	64	222.53	211.32	-5.02472	-5.64686	209.964	1.98782
1989	9		228.4	258.93	225.1		142.939	64	228.41	206.939	-9.39645	-9.98947	205.593	1.98611
1989	10		207.4	225.855	212.2		134.747	64	207.35	198.747	-4.17213	-4.80016	197.397	1.98226
1989	11		230	261.45	238.2		151.257	64	230	215.257	-6.41	-7.0067	213.885	1.98917
1989	12		206.3	224.123	211.4		134.239	64	206.35	198.239	-3.90742	-4.58567	196.887	1.98199
1990	1	1990	203.4	219.555	227.4	5	144.399	64	203.41	208.399	2.45772	1.78998	207.051	1.98671
1990	2		174.1	173.407	171.8		109.093	64	174.09	173.093	-0.578403	-1.49918	171.48	1.96177
1990	3		187	193.725	191.7		121.73	64	186.99	185.73	-0.679412	-1.43992	184.297	1.97381
1990	4		186.6	193.095	189.7		120.459	64	186.62	184.459	-1.14711	-1.93223	183.014	1.97279
1990	5		194	204.75	175.2		111.252	64	193.99	175.252	-9.66392	-10.4708	173.678	1.96416
1990	6		176.3	176.873	153.3		97.3455	64	176.34	161.346	-8.48242	-9.57007	159.464	1.94567
1990	7		186.6	193.095	191.1		121.349	64	186.61	185.349	-0.670686	-1.44549	183.913	1.97351
1990	8		228.1	258.457	252.1		160.083	64	228.09	224.083	-1.76085	-2.38401	222.652	1.99169
1990	9		179.3	181.598	169.1		107.379	64	179.27	171.379	-4.41801	-5.32014	169.733	1.95976
1990	10		180.9	184.118	199.4		126.619	64	180.85	190.619	5.37258	4.6333	189.229	1.97737
1990	11		180.3	183.173	178.8		113.538	64	180.26	177.538	-1.53189	-2.3627	176.001	1.96653
1990	12		198.5	211.838	197.1		125.159	64	198.54	189.159	-4.70605	-5.4308	187.758	1.97636
1991	1		222.1	249.007	195.3		124.016	64	222.11	188.016	-15.3465	-15.9853	186.605	1.97554
1991	2		237.2	272.79	240.3		152.591	64	237.2	216.591	-8.68866	-9.2702	215.211	1.9896
1991	3		227.6	257.67	197		125.095	64	227.63	189.095	-16.9178	-17.5444	187.694	1.97632
1991	4		200.1	214.357	197.6		125.476	64	200.07	189.476	-5.30935	-5.99404	188.078	1.97659
1991	5		194.5	205.537	166.9		105.982	64	194.51	169.982	-12.6059	-13.4712	168.307	1.95804
1991	6		213.3	235.148	224.7		142.684	64	213.33	206.684	-3.1015	-3.74566	205.339	1.98601
1991	7		218.9	243.968	240.2		152.527	64	218.89	216.527	-1.08406	-1.70957	215.148	1.98958
1991	8		215.5	238.612	240.8		152.908	64	215.52	216.908	0.653364	0.00315944	215.527	1.9897
1991	9		182.5	186.637	168.9		107.252	64	182.54	171.252	-6.16356	-7.08718	169.603	1.95961
1991	10		200	214.2	197.1		125.159	64	199.97	189.159	-5.42075	-6.10707	187.758	1.97636
1991	11		168.3	164.273	159.5		101.282	64	168.34	165.282	-1.79293	-2.87381	163.502	1.95171
1991	12		217	240.975	212.6		135.001	64	216.95	199.001	-8.29447	-8.89536	197.652	1.98239
1992	1		210.6	230.895	198.3		125.921	64	210.65	189.921	-9.81933	-10.5029	188.526	1.97689
1992	2		226.5	255.938	230.7		146.494	64	226.46	210.494	-7.06645	-7.64763	209.141	1.98752
1992	3		169.6	166.32	151		95.885	64	169.65	159.885	-5.72818	-6.88873	157.963	1.94324
1992	4		159.7	150.727	142.2		90.297	64	159.68	154.297	-3.38322	-4.68013	152.207	1.93292
1992	5		128.2	101.115	94.3		59.8805	64	128.15	123.88	-3.36934	-5.89657	120.594	1.83332
1992	6		120.4	88.83	98.5		62.5475	64	120.43	126.547	5.1059	2.44199	123.371	1.84611
1992	7		136.5	114.188	114.2		72.517	64	136.5	136.517	0.0124542	-2.00654	133.761	1.8858
1992	8		125.1	96.2325	91.9		58.3565	64	125.12	122.357	-2.19305	-4.8849	119.008	1.82555
1992	9		118	85.05	94		59.69	64	118.02	123.69	4.82203	2.01261	120.395	1.83237
1992	10		130.8	105.21	133.4		84.709	64	130.73	148.709	13.6919	12.0086	146.429	1.92071
1992	11		142	122.85	129.6		82.296	64	142.03	146.296	3.02535	1.33619	143.928	1.91477
1992	12		134.7	111.352	122		77.47	64	134.74	141.47	5.02598	3.09919	138.916	1.90153
1993	1		117.2	83.79	81.4		51.689	64	117.16	115.689	-1.28925	-4.32409	112.094	1.78703
1993	2		139.1	118.282	127.8		81.153	64	139.14	145.153	4.35155	2.58867	142.742	1.9118
1993	3		135	111.825	102.4		65.024	64	135.01	129.024	-4.42667	-6.70933	125.952	1.8571
1993	4		116.7	83.0025	94.4		59.944	64	116.67	123.944	6.20737	3.41959	120.66	1.83364
1993	5		114.9	80.1675	78.8		50.038	64	114.86	114.038	-0.750218	-3.89161	110.39	1.77624
1993	6		112.8	76.86	69.6		44.196	64	112.77	108.196	-4.08156	-7.42032	104.402	1.73351
1993	7		102.2	60.165	80.4		51.054	64	102.22	115.054	12.5773	9.0179	111.438	1.78294
1993	8		96	50.4	62.5		39.6875	64	95.98	103.688	8.00781	4.02267	99.841	1.69502
1993	9		87.9	37.6425	31.2		19.812	64	87.9	83.812	-4.65074	-7.85263	80.9975	1.44722
1993	10		99.7	56.2275	71.1		45.1485	64	99.68	109.148	9.47693	5.7115	105.373	1.74099
1993	11		93.8	46.935	48.2		30.607	64	93.81	94.607	0.860341	-3.09747	90.9043	1.5998
1993	12		101.5	59.0625	68.4		43.434	64	101.52	107.434	5.84631	2.07538	103.627	1.72736
1994	1		111.3	74.4975	84.9		53.9115	64	111.33	117.912	5.94025	2.75168	114.393	1.80073
1994	2		97.2	52.29	54.9		34.8615	64	97.17	98.8615	1.70936	-2.19083	95.0412	1.64764
1994	3		89.5	40.1625	47.5		30.1625	64	89.5	94.1625	5.2095	1.09297	90.4782	1.59445
1994	4		79.7	24.7275	27.4		17.399	64	79.67	81.399	2.13174	-0.914809	78.9412	1.40584
1994	5		81.7	27.8775	29.8		18.923	64	81.67	82.923	1.49694	-1.76101	80.2318	1.43232
1994	6		79.7	24.7275	39.7		25.2095	64	79.75	89.2095	11.9316	7.61822	85.8255	1.52966
1994	7		83.2	30.24	50.6		32.131	64	83.15	96.131	15.5421	11.0936	92.3743	1.61764
1994	8		78	22.05	34.3		21.7805	64	78	85.7805	9.975	6.05707	82.7245	1.47884
1994	9		79.9	25.0425	40.5		25.7175	64	79.91	89.7175	12.2872	7.98894	86.294	1.53676
1994	10		87.1	36.3825	67.1		42.6085	64	87.12	106.608	22.3978	17.9855	102.789	1.72054
1994	11		79.1	23.7825	29.5		18.7325	64	79.14	82.7325	4.59229	1.17375	80.0689	1.42908
1994	12		74.8	17.01	32.2		20.447	64	81.48	84.447	12.8971	0.085942	81.55	1.45763
1995	1		80	25.2	32.6		20.701	64	80.02	84.701	5.87625	2.18979	81.7723	1.46173
1995	2		83.5	30.7125	45.8		29.083	64	83.49	93.083	11.4766	7.13728	89.4489	1.58113
1995	3		84.2	31.815	46.3		29.4005	64	84.19	93.4005	10.927	6.6051	89.7508	1.58509
1995	4		78.2	22.365	21.6		13.716	64	78.21	77.716	-0.618926	-2.88969	75.95	1.33662
1995	5		77.1	20.6325	19.4		12.319	64	77.14	76.319	-1.01297	-2.94516	74.8681	1.3083
1995	6		78.1	22.2075	22.5		14.2875	64	78.1	78.2875	0.240077	-2.17498	76.4013	1.34786
1995	7		76.3	19.3725	20.4		12.954	64	76.33	76.954	0.857143	-1.27603	75.356	1.32132
1995	8		75.7	18.4275	18.2		11.557	64	75.65	75.557	-0.188904	-1.79588	74.2914	1.29235
1995	9		72.8	13.86	15.7		9.9695	64	72.75	73.9695	1.60646	0.511757	73.1223	1.25792
1995	10		77.5	21.2625	30.6		19.431	64	77.45	83.431	7.6529	4.15524	80.6682	1.44088
1995	11		72.6	13.545	14		8.89	64	72.58	72.89	0.399449	-0.311857	72.3537	1.23356
1995	12		70.3	9.9225	14.9		9.4615	64	70.28	73.4615	4.49716	3.52567	72.7578	1.24656
1996	1		72.1	12.7575	13.3		8.4455	64	72.13	72.4455	0.479196	-0.119697	72.0437	1.2233
1996	2		69.8	9.135	7.7		4.8895	64	70.28	68.8895	-1.30444	-0.808375	69.7119	1.1361
1996	3		70	9.45	12.6		8.001	64	69.99	72.001	2.85857	2.49691	71.7376	1.2129
1996	4		69.9	9.2925	6.8		4.318	64	69.94	68.318	-2.26323	-0.824287	69.3635	1.1212
1996	5		71.7	12.1275	7.6		4.826	64	71.7	68.826	-4.00837	-2.82736	69.6728	1.13446
1996	6		71.8	12.285	16.5		10.4775	64	72.07	74.4775	3.72911	1.97242	73.4915	1.26912
1996	7		73.5	14.9625	11.8		7.493	64	73.81	71.493	-2.73061	-3.27504	71.3927	1.20084
1996	8		74.2	16.065	19.7		12.5095	64	74.28	76.5095	3.11253	0.987864	75.0138	1.31223
1996	9		70.1	9.6075	3		1.905	64	70.18	65.905	-5.98431	-3.13262	67.9815	1.05541
1996	10		68.7	7.4025	0.7		0.4445	64	68.78	64.4445	-6.19432	-2.26829	67.2199	1.01321
1996	11		76.9	20.3175	24.9		15.8115	64	77.27	79.8115	3.78609	0.464009	77.6285	1.37693
1996	12		75.3	17.7975	14		8.89	64	73.33	72.89	-3.20053	-1.33144	72.3537	1.23356
1997	1		71.6	11.97	7.4		4.699	64	71.25	68.699	-4.05168	-2.32296	69.5949	1.13116
1997	2		72	12.6	11		6.985	64	71.89	70.985	-1.40972	-1.16408	71.0531	1.1886
1997	3		72.8	13.86	12.1		7.6835	64	72.53	71.6835	-1.53365	-1.39059	71.5214	1.20539
1997	4		74	15.75	23		14.605	64	75.08	78.605	6.22297	2.09673	76.6542	1.35403
1997	5		76.3	19.3725	25.4		16.129	64	76.43	80.129	5.01835	1.90809	77.8884	1.38282
1997	6		74	15.75	20.8		13.208	64	74.18	77.208	4.33514	1.85088	75.553	1.32645
1997	7		73.4	14.805	12.9		8.1915	64	73.57	72.1915	-1.64646	-2.31307	71.8683	1.21737
1997	8		81	26.775	35.7		22.6695	64	81.03	86.6695	6.99938	3.07013	83.5177	1.49252
1997	9		97.2	52.29	59.7		37.9095	64	97.11	101.91	4.84516	0.979585	98.0613	1.67835
1997	10		84.3	31.9725	32.8		20.828	64	84.45	84.828	0.626335	-3.03889	81.8837	1.46377
1997	11		97.4	52.605	50.4		32.004	64	96.81	96.004	-1.43326	-4.70891	92.2513	1.61619
1997	12		95.7	49.9275	55.5		35.2425	64	93.91	99.2425	3.70167	1.60404	95.4164	1.65163
1998	1		90.4	41.58	44.5		28.2575	64	89.74	92.2575	2.05476	-1.19543	88.6672	1.57066
1998	2		91.1	42.6825	50.2		31.877	64	90.99	95.877	5.24369	1.25109	92.1284	1.61473
1998	3		108	69.3	82		52.07	64	108.03	116.07	7.47222	4.1263	112.488	1.78944
1998	4		109	70.875	70.6		44.831	64	114.87	108.831	-0.155046	-8.54944	105.049	1.73852
1998	5		109	70.875	74		46.99	64	109.5	110.99	1.82569	-2.04849	107.257	1.75488
1998	6		111.8	75.285	90.5		57.4675	64	112	121.468	8.64714	5.43195	118.084	1.82084
1998	7		117.7	84.5775	96.7		61.4045	64	117.6	125.405	6.54588	3.89478	122.18	1.84075
1998	8		139.4	118.755	121.1		76.8985	64	143.33	140.899	1.07496	-3.49434	138.322	1.89983
1998	9		139.8	119.385	132		83.82	64	139.55	147.82	5.73677	4.26933	145.508	1.91857
1998	10		116.6	82.845	78.5		49.8475	64	116.99	113.847	-2.36063	-5.80923	110.194	1.77497
1998	11		137.1	115.132	97.3		61.7855	64	136.87	125.785	-8.25274	-10.4427	122.577	1.84256
1998	12		145.5	128.362	119.2		75.692	64	145.5	139.692	-3.99175	-5.79622	137.067	1.89615
1999	1		138.1	116.707	86		54.61	64	137.22	118.61	-14.113	-16.1074	115.117	1.80485
1999	2		138.6	117.495	98		62.23	64	139.48	126.23	-8.92496	-11.7866	123.04	1.84464
1999	3		124.9	95.9175	103.5		65.7225	64	120.75	129.722	3.86109	4.91084	126.68	1.86005
1999	4		118	85.05	93.6		59.436	64	118.07	123.436	4.60678	1.74554	120.131	1.83109
1999	5		151.9	138.442	149.6		94.996	64	151.61	158.996	4.67149	3.58746	157.049	1.94171
1999	6		175.2	175.14	207.2		131.572	64	175.33	195.572	11.6279	10.7687	194.211	1.98049
1999	7		171	168.525	173.5		110.172	64	170.05	174.173	1.85526	1.48738	172.579	1.96299
1999	8		175	174.825	142.3		90.3605	64	174.12	154.361	-11.794	-12.5475	152.272	1.93304
1999	9		137.2	115.29	106.3		67.5005	64	137.25	131.5	-4.15415	-6.35097	128.533	1.8673
1999	10		163.7	157.027	168.7		107.124	64	164.24	171.125	4.53543	3.18651	169.474	1.95945
1999	11		187.4	194.355	188.3		119.571	64	187.74	183.571	-2.04349	-2.99613	182.115	1.97206
1999	12		164.5	158.287	116.8		74.168	64	165.06	138.168	-16.0073	-17.9206	135.48	1.8913
2000	1	2000	153.1	140.332	133.1	5	84.5185	64	153.65	148.519	-2.99249	-4.82813	146.232	1.92025
2000	2		169.1	165.532	165.7		105.219	64	168.64	169.219	0.0706682	-0.658759	167.529	1.95707
2000	3		206.1	223.807	217.7		138.239	64	206.77	202.239	-1.87312	-2.84111	200.895	1.98402
2000	4		185.5	191.362	191.5		121.603	64	185.49	185.603	0.0552561	-0.712065	184.169	1.97371
2000	5		188.7	196.402	165.9		105.347	64	195.38	169.346	-10.2562	-14.1884	167.659	1.95724
2000	6		185.5	191.362	188		119.38	64	186.07	183.38	-1.14286	-2.22908	181.922	1.9719
2000	7		211.4	232.155	244.3		155.131	64	212.21	219.131	3.65681	2.60395	217.736	1.99036
2000	8		167.2	162.54	180.5		114.618	64	167.63	178.618	6.82865	5.64749	177.097	1.9676
2000	9		183.8	188.685	156		99.06	64	184.56	163.06	-11.284	-12.6441	161.224	1.94839
2000	10		166.6	161.595	141.6		89.916	64	167.07	153.916	-7.61345	-9.13181	151.813	1.93215
2000	11		174.9	174.668	158.1		100.394	64	176.64	164.394	-6.00715	-7.95325	162.591	1.95041
2000	12		168.2	164.115	143.3		90.9955	64	168.28	154.995	-7.85048	-9.12317	152.928	1.9343
2001	1		161.3	153.248	142.6		90.551	64	162.16	154.551	-4.18413	-5.97625	152.469	1.93342
2001	2		143.1	124.582	121.5		77.1525	64	143.18	141.153	-1.36094	-3.20875	138.586	1.90059
2001	3		176.1	176.557	165.8		105.283	64	176.57	169.283	-3.8711	-5.08358	167.594	1.95716
2001	4		179.3	181.598	161.7		102.679	64	193.73	166.679	-7.03876	-14.8648	164.932	1.95369
2001	5		152	138.6	142.1		90.2335	64	150.79	154.233	1.46941	0.896103	152.141	1.93279
2001	6		179.2	181.44	202.9		128.841	64	179.64	192.841	7.61244	6.58335	191.466	1.97883
2001	7		135.6	112.77	123		78.105	64	136.01	142.105	4.7972	2.62186	139.576	1.90338
2001	8		167.1	162.382	161.5		102.552	64	170.92	166.553	-0.327648	-3.5792	164.802	1.95351
2001	9		236.2	271.215	238.2		151.257	64	236.47	215.257	-8.86664	-9.55107	213.885	1.98917
2001	10		206.6	224.595	194.1		123.254	64	209.06	187.254	-9.36423	-11.1087	185.836	1.97498
2001	11		208.1	226.957	176.6		112.141	64	209.93	176.141	-15.3575	-16.8382	174.582	1.9651
2001	12		228.2	258.615	213.4		135.509	64	233.62	199.509	-12.5727	-15.1782	198.161	1.98266
2002	1		220.1	245.857	184.6		117.221	64	220.38	181.221	-17.6642	-18.4424	179.737	1.97003
2002	2		200.1	214.357	170.2		108.077	64	200.27	172.077	-14.0045	-14.8925	170.445	1.96059
2002	3		178.4	180.18	147.1		93.4085	64	178.88	157.409	-11.7665	-13.1178	155.415	1.93888
2002	4		191.1	200.182	186.9		118.681	64	191.41	182.681	-4.40529	-5.32597	181.216	1.97131
2002	5		182.4	186.48	187.5		119.062	64	183.45	183.062	0.363213	-1.00784	181.601	1.97163
2002	6		153.4	140.805	128.8		81.788	64	154.09	145.788	-4.96219	-6.93698	143.401	1.91346
2002	7		179.2	181.44	161		102.235	64	182.42	166.235	-7.23493	-9.83582	164.477	1.95307
2002	8		188.4	195.93	175.6		111.506	64	188.15	175.506	-6.84395	-7.55461	173.936	1.96444
2002	9		177.8	179.235	187.9		119.317	64	178.27	183.317	3.10264	2.01274	181.858	1.97185
2002	10		165.9	160.493	151.2		96.012	64	166.78	160.012	-3.54913	-5.20816	158.094	1.94346
2002	11		165.1	159.232	147.2		93.472	64	165.74	157.472	-4.62023	-6.19029	155.48	1.939
2002	12		152.3	139.073	135.3		85.9155	64	152.59	149.916	-1.56566	-3.21901	147.678	1.92352
2003	1		139.4	118.755	133.5		84.7725	64	139.13	148.773	6.72346	5.29337	146.495	1.92086
2003	2		121.4	90.405	75.7		48.0695	64	121.54	112.07	-7.68575	-10.8404	108.365	1.76267
2003	3		130.8	105.21	100.7		63.9445	64	130.9	127.945	-2.1831	-4.63972	124.827	1.85241
2003	4		127.2	99.54	97.9		62.1665	64	122.4	126.167	-0.8125	0.468925	122.974	1.84434
2003	5		118.7	86.1525	86.8		55.118	64	126.46	119.118	0.352148	-8.55276	115.644	1.8078
2003	6		133.4	109.305	118.7		75.3745	64	137.09	139.375	4.47864	-0.258133	136.736	1.89516
2003	7		131.9	106.943	128.3		81.4705	64	132.22	145.471	10.2885	8.20706	143.071	1.91264
2003	8		125.2	96.39	115.4		73.279	64	125.24	137.279	9.64776	7.43747	134.555	1.88837
2003	9		113.4	77.805	78.5		49.8475	64	113.84	113.847	0.394621	-3.20294	110.194	1.77497
2003	10		150.1	135.607	97.8		62.103	64	155.43	126.103	-15.9873	-20.924	122.908	1.84405
2003	11		137.7	116.077	82.9		52.6415	64	145.64	116.642	-15.293	-22.3574	113.079	1.79301
2003	12		111.4	74.655	72.2		45.847	64	111.88	109.847	-1.39408	-5.17804	106.087	1.74635
2004	1		110.4	73.08	60.6		38.481	64	110.24	102.481	-7.17301	-10.5298	98.632	1.68381
2004	2		104.4	63.63	74.6		47.371	64	104.44	111.371	6.6772	3.07121	107.648	1.75766
2004	3		111	74.025	74.8		47.498	64	111.21	111.498	0.448649	-3.08618	107.778	1.75858
2004	4		101.9	59.6925	59.2		37.592	64	101.81	101.592	-0.302257	-3.99294	97.7448	1.67528
2004	5		102.1	60.0075	72.8		46.228	64	102.29	110.228	7.96082	4.09279	106.477	1.74923
2004	6		100.5	57.4875	66.5		42.2275	64	100.1	106.227	5.699	2.3006	102.403	1.71734
2004	7		122.4	91.98	83.8		53.213	64	124.14	117.213	-4.23775	-8.43398	113.67	1.79652
2004	8		112.7	76.7025	69.7		44.2595	64	112.45	108.26	-3.94011	-7.09936	104.467	1.73401
2004	9		104.1	63.1575	48.8		30.988	64	105.55	94.988	-8.75312	-13.5287	91.2705	1.60434
2004	10		105.1	64.7325	74.2		47.117	64	105.15	111.117	5.72502	2.12753	107.387	1.75581
2004	11		111.2	74.34	70.1		44.5135	64	113.33	108.513	-2.41592	-7.59238	104.726	1.73602
2004	12		92.1	44.2575	28.9		18.3515	64	92.28	82.3515	-10.5847	-13.5843	79.7445	1.42253
2005	1		99	55.125	48.1		30.5435	64	99.59	94.5435	-4.50152	-8.78269	90.8433	1.59904
2005	2		94.9	48.6675	43.5		27.6225	64	94.95	91.6225	-3.45364	-7.2467	88.0693	1.56242
2005	3		89	39.375	39.6		25.146	64	89.14	89.146	0.164045	-3.78379	85.7671	1.52877
2005	4		86.6	35.595	38.7		24.5745	64	86.55	88.5745	2.28002	-1.51	85.2431	1.52064
2005	5		101.7	59.3775	61.9		39.3065	64	103.9	103.306	1.57965	-4.2747	99.4586	1.69152
2005	6		96.6	51.345	56.8		36.068	64	97.06	100.068	3.59006	-0.853476	96.2316	1.66013
2005	7		99.6	56.07	62.4		39.624	64	103.93	103.624	4.04016	-3.99577	99.7772	1.69444
2005	8		92.8	45.36	60.5		38.4175	64	100.66	102.418	10.3637	-2.07778	98.5685	1.6832
2005	9		92.1	44.2575	37.2		23.622	64	110.77	87.622	-4.86211	-23.8276	84.3762	1.50678
2005	10		76.1	19.0575	13.2		8.382	64	76.21	72.382	-4.88568	-5.52461	71.9997	1.22182
2005	11		84.4	32.13	27.5		17.4625	64	84.47	81.4625	-3.48045	-6.48234	78.9944	1.40696
2005	12		87.9	37.6425	59.3		37.6555	64	88.01	101.655	15.649	11.1329	97.8081	1.6759
2006	1		80.8	26.46	20.9		13.2715	64	80.67	77.2715	-4.36696	-6.28191	75.6024	1.32773
2006	2		74.7	16.8525	5.7		3.6195	64	74.67	67.6195	-9.47858	-7.66256	68.9484	1.10264
2006	3		74.7	16.8525	17.3		10.9855	64	74.75	74.9855	0.382195	-1.18342	73.8654	1.28014
2006	4		89.6	40.32	50.3		31.9405	64	89.9	95.9405	7.07645	2.54708	92.1898	1.61546
2006	5		82.7	29.4525	37.2		23.622	64	82.62	87.622	5.95163	2.12562	84.3762	1.50678
2006	6		79	23.625	24.5		15.5575	64	79.1	79.5575	0.705696	-2.12175	77.4217	1.37218
2006	7		78.3	22.5225	22.2		14.097	64	78.36	78.097	-0.259259	-2.69227	76.2503	1.34413
2006	8		81.4	27.405	20.8		13.208	64	81.58	77.208	-5.14988	-7.38786	75.553	1.32645
2006	9		78.6	22.995	23.7		15.0495	64	78.87	79.0495	0.571883	-2.35736	77.0108	1.36256
2006	10		73.8	15.435	14.9		9.4615	64	73.95	73.4615	-0.458672	-1.61212	72.7578	1.24656
2006	11		84.4	32.13	35.7		22.6695	64	84.56	86.6695	2.68898	-1.23258	83.5177	1.49252
2006	12		81.9	28.1925	22.3		14.1605	64	87.58	78.1605	-4.56593	-12.879	76.3006	1.34538
2007	1		80.8	26.46	29.3		18.6055	64	81.09	82.6055	2.23453	-1.39282	79.9606	1.4269
2007	2		75.8	18.585	18.4		11.684	64	75.76	75.684	-0.153034	-1.8125	74.3869	1.29503
2007	3		71.5	11.8125	7.2		4.572	64	71.5	68.572	-4.0951	-2.7729	69.5174	1.12786
2007	4		72.9	14.0175	5.4		3.429	64	72.87	67.429	-7.5048	-5.53419	68.8372	1.09751
2007	5		76	18.9	19.5		12.3825	64	75.98	76.3825	0.503289	-1.39958	74.9166	1.30961
2007	6		76	18.9	21.3		13.5255	64	76.39	77.5255	2.00724	-0.771527	75.8006	1.33282
2007	7		74	15.75	15.1		9.5885	64	73.83	73.5885	-0.556081	-1.3294	72.8485	1.24941
2007	8		70.9	10.8675	9.8		6.223	64	70.76	70.223	-0.954866	-0.290937	70.5541	1.16989
2007	9		67.8	5.985	4		2.54	64	67.71	66.54	-1.85841	0.916774	68.3307	1.07318
2007	10		67.1	4.8825	1.5		0.9525	64	67.27	64.9525	-3.20045	0.309299	67.4781	1.0281
2007	11		68.1	6.4575	2.8		1.778	64	67.88	65.778	-3.40969	0.0485721	67.913	1.05181
2007	12		76.1	19.0575	17.3		10.9855	64	75.77	74.9855	-1.46452	-2.51366	73.8654	1.28014
2008	1		71.9	12.4425	4.1		2.6035	64	71.66	66.6035	-7.36648	-4.59635	68.3663	1.07494
2008	2		69.4	8.505	2.9		1.8415	64	69.33	65.8415	-5.12752	-1.99453	67.9472	1.05361
2008	3		72.2	12.915	15.5		9.8425	64	72.3	73.8425	2.27493	1.0107	73.0307	1.2551
2008	4		70.7	10.5525	3.6		2.286	64	70.65	66.286	-6.24328	-3.48226	68.1898	1.06611
2008	5		69.9	9.2925	4.6		2.921	64	69.86	66.921	-4.2618	-1.88185	68.5453	1.08369
2008	6		68	6.3	5.2		3.302	64	67.94	67.302	-1.02647	1.21232	68.7637	1.09408
2008	7		67.8	5.985	0.6		0.381	64	67.82	64.381	-5.04277	-0.931719	67.1881	1.01134
2008	8		68	6.3	0.3		0.1905	64	67.81	64.1905	-5.60221	-1.05659	67.0935	1.00568
2008	9		67.8	5.985	1.2		0.762	64	67.7	64.762	-4.48083	-0.472104	67.3804	1.02254
2008	10		67.8	5.985	4.2		2.667	64	67.75	66.667	-1.67109	0.962158	68.4019	1.0767
2008	11		67.1	4.8825	6.6		4.191	64	67.02	68.191	1.62593	3.38277	69.2871	1.11786
2008	12		67	4.725	1		0.635	64	66.89	64.635	-3.52985	0.636619	67.3158	1.01882
2009	1		67.6	5.67	1.3		0.8255	64	67.48	64.8255	-4.10429	-0.0995374	67.4128	1.0244
2009	2		68.3	6.7725	1.2		0.762	64	68.17	64.762	-5.18009	-1.1583	67.3804	1.02254
2009	3		68.6	7.245	0.6		0.381	64	68.42	64.381	-6.15015	-1.80048	67.1881	1.01134
2009	4		70.3	9.9225	1.2		0.762	64	70.11	64.762	-7.87767	-3.89333	67.3804	1.02254
2009	5		72.1	12.7575	2.9		1.8415	64	71.91	65.8415	-8.68031	-5.51078	67.9472	1.05361
2009	6		70.8	10.71	6.3		4.0005	64	70.74	68.0005	-3.9541	-2.2147	69.1733	1.11281
2009	7		70.4	10.08	5.5		3.4925	64	70.41	67.4925	-4.12997	-2.18125	68.8742	1.09923
2009	8		69	7.875	0		0	64	69.04	64	-7.24638	-2.95481	67	1
2009	9		71.2	11.34	7.1		4.5085	64	71.05	68.5085	-3.7802	-2.21146	69.4788	1.1262
2009	10		71.8	12.285	7.7		4.8895	64	71.66	68.8895	-4.05362	-2.71857	69.7119	1.1361
2009	11		72	12.6	6.9		4.3815	64	72.05	68.3815	-5.02569	-3.67548	69.4018	1.12287
2009	12		74.4	16.38	16.3		10.3505	64	74.44	74.3505	-0.0665323	-1.39874	73.3988	1.26633
2010	1	2010	78.5	22.8375	19.5	5	12.3825	64	78.71	76.3825	-2.69745	-4.81947	74.9166	1.30961
2010	2		82.7	29.4525	28.5		18.0975	64	82.7	82.0975	-0.728537	-3.83418	79.5291	1.41813
2010	3		82.5	29.1375	24		15.24	64	82.12	79.24	-3.95152	-6.03455	77.1644	1.36619
2010	4		76.5	19.6875	10.4		6.604	64	76.24	70.604	-7.70719	-7.13265	70.8021	1.1793
2010	5		75.4	17.955	13.9		8.8265	64	75.26	72.8265	-3.41313	-3.9209	72.3091	1.2321
2010	6		74.8	17.01	18.8		11.938	64	74.67	75.938	1.52139	-0.122484	74.5785	1.30037
2010	7		82.4	28.98	25.2		16.002	64	82.2	80.002	-2.91019	-5.37195	77.7843	1.38047
2010	8		81.5	27.5625	29.6		18.796	64	81.15	82.796	1.59018	-1.26537	80.1231	1.43016
2010	9		81.9	28.1925	36.4		23.114	64	81.81	87.114	6.3663	2.5758	83.9173	1.49923
2010	10		81.2	27.09	33.6		21.336	64	80.89	85.336	5.0936	1.78134	82.3309	1.47186
2010	11		80.7	26.3025	34.4		21.844	64	80.77	85.844	6.37423	2.48967	82.7809	1.47983
2010	12		81.6	27.72	24.5		15.5575	64	81.59	79.5575	-2.50306	-5.10884	77.4217	1.37218
2011	1		80.8	26.46	27.3		17.3355	64	80.73	81.3355	0.662748	-2.28165	78.888	1.40471
2011	2		92.3	44.5725	48.3		30.6705	64	92.26	94.6705	2.56826	-1.40339	90.9652	1.60056
2011	3		114.6	79.695	78.6		49.911	64	122.91	113.911	-0.601222	-10.2927	110.259	1.77539
2011	4		113.3	77.6475	76.1		48.3235	64	113.61	112.323	-0.861871	-4.38736	108.626	1.76447
2011	5		97.9	53.3925	58.2		36.957	64	97.79	100.957	3.12257	-0.692226	97.1131	1.66905
2011	6		98.8	54.81	56.1		35.6235	64	98.88	99.6235	0.833502	-3.12274	95.7922	1.65558
2011	7		97.2	52.29	64.5		40.9575	64	97.43	104.958	7.98097	3.78657	101.119	1.70639
2011	8		104.3	63.4725	65.8		41.783	64	104.16	105.783	1.42186	-2.11881	101.953	1.71355
2011	9		135.9	113.243	120.1		76.2635	64	136.68	140.263	3.21082	0.717797	137.661	1.89791
2011	10		136.3	113.873	125.7		79.8195	64	136.52	143.82	5.51687	3.54336	141.357	1.90821
2011	11		149.8	135.135	139.1		88.3285	64	150.23	152.328	1.68792	-0.0374482	150.174	1.92885
2011	12		136.8	114.66	109.3		69.4055	64	137.07	133.406	-2.48136	-4.77931	130.519	1.87466
2012	1		128.9	102.218	94.4		59.944	64	130.49	123.944	-3.84484	-7.53342	120.66	1.83364
2012	2		104.2	63.315	47.8		30.353	64	104.29	94.353	-9.4501	-13.0687	90.6607	1.59675
2012	3		113.8	78.435	86.6		54.991	64	114.53	118.991	4.56151	0.857816	115.512	1.80706
2012	4		113.9	78.5925	85.9		54.5465	64	114.14	118.547	4.07946	0.798613	115.052	1.80448
2012	5		124.2	94.815	96.5		61.2775	64	124.12	125.278	0.867552	-1.66936	122.048	1.84015
2012	6		124.7	95.6025	92		58.42	64	124.19	122.42	-1.82839	-4.11946	119.074	1.82588
2012	7		140.5	120.487	100.1		63.5635	64	142.31	127.564	-9.20747	-12.5644	124.43	1.85072
2012	8		118.6	85.995	94.8		60.198	64	118.75	124.198	4.72007	1.83076	120.924	1.8349
2012	9		124.3	94.9725	93.7		59.4995	64	124.7	123.5	-0.644006	-3.61104	120.197	1.83141
2012	10		122.4	91.98	76.5		48.5775	64	122.22	112.578	-8.02492	-10.9093	108.887	1.76625
2012	11		118.3	85.5225	87.6		55.626	64	118.45	119.626	1.12088	-1.9238	116.171	1.8107
2012	12		105	64.575	56.8		36.068	64	104.87	100.068	-4.69714	-8.23723	96.2316	1.66013
2013	1		123	92.925	96.1		61.0235	64	122.78	125.023	1.64512	-0.811626	121.783	1.83893
2013	2		101.7	59.3775	60.9		38.6715	64	101.9	102.672	0.955261	-3.02011	98.8225	1.6856
2013	3		110.1	72.6075	78.3		49.7205	64	110.22	113.721	3.28837	-0.142503	110.063	1.77411
2013	4		126	97.65	107.3		68.1355	64	125.84	132.135	4.86944	2.66627	129.195	1.8698
2013	5		134.2	110.565	120.2		76.327	64	134.33	140.327	4.56557	2.52895	137.727	1.8981
2013	6		113.6	78.12	76.7		48.7045	64	114.25	112.704	-0.788292	-4.58014	109.017	1.76714
2013	7		119.2	86.94	86.2		54.737	64	119.29	118.737	-0.388423	-3.3875	115.249	1.80559
2013	8		118.3	85.5225	91.8		58.293	64	117.75	122.293	3.37532	1.01229	118.942	1.82522
2013	9		103.6	62.37	54.5		34.6075	64	103.91	98.6075	-4.81902	-8.77543	94.7915	1.64495
2013	10		131.5	106.312	114.4		72.644	64	131.92	136.644	3.91179	1.49587	133.893	1.88623
2013	11		145.1	127.732	113.9		72.3265	64	145.55	136.327	-6.04652	-8.2359	133.563	1.88515
2013	12		143.1	124.582	124.2		78.867	64	143.49	142.867	-0.162823	-2.17583	140.368	1.90556
2014	1		155	143.325	117		74.295	64	157.5	138.295	-10.7774	-13.8968	135.613	1.89172
2014	2		166.1	160.807	146.1		92.7735	64	166.01	156.774	-5.61499	-6.7763	154.761	1.93771
2014	3		148.3	132.773	128.7		81.7245	64	148.97	145.724	-1.73668	-3.78269	143.335	1.9133
2014	4		145.2	127.89	112.5		71.4375	64	144.92	135.438	-6.72348	-8.47604	132.637	1.88205
2014	5		133	108.675	112.5		71.4375	64	132.95	135.438	1.83271	-0.235791	132.637	1.88205
2014	6		126	97.65	102.9		65.3415	64	126.22	129.341	2.65198	0.0496643	126.283	1.85845
2014	7		141.8	122.535	100.2		63.627	64	142.4	127.627	-9.99506	-12.5732	124.496	1.851
2014	8		128.3	101.273	106.9		67.8815	64	127.67	131.882	2.7915	0.987277	128.93	1.86881
2014	9		149.3	134.348	130		82.55	64	148.12	146.55	-1.84193	-2.65242	144.191	1.91542
2014	10		154	141.75	90		57.15	64	153.91	121.15	-21.3312	-23.4918	117.754	1.81913
2014	11		151.2	137.34	103.6		65.786	64	152.3	129.786	-14.1627	-16.7787	126.746	1.86032
2014	12		153.9	141.593	112.9		71.6915	64	154.07	135.692	-11.8314	-13.7398	132.901	1.88294
2015	1		137	114.975	93		59.055	64	137.48	123.055	-10.1788	-12.9077	119.735	1.82916
2015	2		125.7	97.1775	66.7		42.3545	64	125.77	106.355	-15.3902	-18.4769	102.532	1.71841
2015	3		125	96.075	54.5		34.6075	64	125.58	98.6075	-21.114	-24.5171	94.7915	1.64495
2015	4		129.9	103.793	75.3		47.8155	64	129.93	111.816	-13.9219	-16.7985	108.104	1.76086
2015	5		122.5	92.1375	88.8		56.388	64	122.65	120.388	-1.72408	-4.63734	116.962	1.81496
2015	6		130.7	105.052	66.5		42.2275	64	132.6	106.227	-18.7242	-22.7731	102.403	1.71734
2015	7		110.5	73.2375	65.8		41.783	64	110.5	105.783	-4.26878	-7.7348	101.953	1.71355
2015	8		109.1	71.0325	64.4		40.894	64	108.59	104.894	-3.85518	-6.93876	101.055	1.70583
2015	9		103	61.425	78.6		49.911	64	103.04	113.911	10.5932	7.00622	110.259	1.77539
2015	10		103.3	61.8975	63.6		40.386	64	103.3	104.386	1.05131	-2.66861	100.543	1.70133
2015	11		107.1	67.8825	62.2		39.497	64	107.32	103.497	-3.36415	-7.14712	99.6497	1.69327
2015	12		109.1	71.0325	58		36.83	64	109.02	100.83	-7.5802	-11.0375	96.9869	1.66779
2016	1		100.1	56.8575	57		36.195	64	100.33	100.195	0.0949051	-3.95961	96.3573	1.66142
2016	2		101	58.275	56.4		35.814	64	101.17	99.814	-1.17426	-5.12956	95.9804	1.65754
2016	3		90.5	41.7375	54.1		34.3535	64	90.5	98.3535	8.6779	4.46635	94.542	1.64224
2016	4		94.1	47.4075	37.9		24.0665	64	94.12	88.0665	-6.4118	-9.9238	84.7797	1.5133
2016	5		95.2	49.14	51.5		32.7025	64	95.47	96.7025	1.57826	-2.6614	92.9292	1.62413
2016	6		84.5	32.2875	20.5		13.0175	64	84.55	77.0175	-8.85503	-10.8159	75.4052	1.3226
2016	7		88.7	38.9025	32.4		20.574	64	89.12	84.574	-4.65163	-8.36955	81.6611	1.45968
2016	8		87	36.225	50.2		31.877	64	87.25	95.877	10.2034	5.59125	92.1284	1.61473
2016	9		88.6	38.745	44.6		28.321	64	88.39	92.321	4.19977	0.381465	88.7272	1.57147
2016	10		85.5	33.8625	33.4		21.209	64	85.61	85.209	-0.340351	-3.96116	82.2189	1.46985
2016	11		76.8	20.16	21.4		13.589	64	76.85	77.589	1.02734	-1.30078	75.8503	1.33409
2016	12		72.7	13.7025	18.5		11.7475	64	72.94	75.7475	4.19188	2.04918	74.4347	1.29637
2017	1		74.8	17.01	26.1		16.5735	64	74.91	80.5735	7.71858	4.46456	78.2544	1.39098
2017	2		75	17.325	26.4		16.764	64	75.11	80.764	7.68533	4.39634	78.4121	1.39444
2017	3		73.8	15.435	17.7		11.2395	64	73.95	75.2395	1.95054	0.140689	74.054	1.28559
2017	4		81.6	27.72	32.3		20.5105	64	81.46	84.5105	3.56679	0.178641	81.6055	1.45866
2017	5		75.2	17.64	18.9		12.0015	64	75.25	76.0015	1.06582	-0.828394	74.6266	1.3017
2017	6		77	20.475	19.2		12.192	64	77.19	76.192	-1.04935	-3.13342	74.7713	1.30566
2017	7		80.1	25.3575	17.8		11.303	64	80.11	75.303	-5.98876	-7.50047	74.1014	1.28695
2017	8		79.8	24.885	32.6		20.701	64	80.18	84.701	6.1416	1.98587	81.7723	1.46173
2017	9		94.4	47.88	43.7		27.7495	64	96.55	91.7495	-2.80773	-8.66016	88.1886	1.56408
2017	10		75.9	18.7425	13.2		8.382	64	75.9	72.382	-4.63505	-5.13874	71.9997	1.22182
2017	11		70.6	10.395	5.7		3.6195	64	70.7	67.6195	-4.22167	-2.47756	68.9484	1.10264
2017	12		69.3	8.3475	8.2		5.207	64	69.46	69.207	-0.134199	0.646032	69.9087	1.14427
2018	1		67.7	5.8275	6.8		4.318	64	67.78	68.318	0.912851	2.33623	69.3635	1.1212
2018	2		70.2	9.765	10.7		6.7945	64	69.96	70.7945	0.846866	1.38253	70.9272	1.18397
2018	3		67.5	5.5125	2.5		1.5875	64	67.58	65.5875	-2.83333	0.341746	67.811	1.04639
2018	4		70.4	10.08	8.9		5.6515	64	70.45	69.6515	-1.06321	-0.371564	70.1882	1.15558
2018	5		72.53	13.4348	13.1		8.3185	64	72.53	72.3185	-0.291603	-0.79166	71.9558	1.22034
2018	6		74.95	17.2463	15.6		9.906	64	74.95	73.906	-1.39293	-2.49969	73.0765	1.25651
2018	7		71.88	12.411	1.6		1.016	64	71.88	65.016	-9.54925	-6.07839	67.5109	1.02994
2018	8		70.78	10.6785	8.7		5.5245	64	70.78	69.5245	-1.77381	-0.949539	70.1079	1.15236
2018	9		68.9	7.7175	3.3		2.0955	64	68.9	66.0955	-4.07039	-1.18262	68.0852	1.06077
2018	10		69.12		4.9				69.12				68.654	1.0889
2018	11		67.4		5.9				67.52				69.023	1.10605
2018	12				3.1				67.86				68.016	1.0572
2019	1				8.7				69.29				70.1079	1.15236
2019	2								68.86
2019	3
2019	4
2019	5
2019	6
2019	7
2019	8
2019	9
2019	10
2019	11
2019	12

## Sheet: TABLE 11
ADJUSTED	WDC	%
FLUX/ORIGINAL	STP	Difference
SPACEWEATHER	RUSSIA
224.1	233.4	-3.98458	1947 03 2334
265.84	265.8	0.0150489	1947 04 2658
267.09	267.1	-0.00374392	1947 05 2671
224.49	233.8	-3.98204	1947 06 2338
214.01	222.3	-3.72919	1947 07 2223
237.09	237.1	-0.00421763	1947 08 2371
194.1	201.9	-3.8633	1947 09 2019
207.65	207.7	-0.0240732	1947 10 2077
175.76	175.8	-0.0227531	1947 11 1758
170.93	171	-0.0409357	1947 12 1710
145.1	150.7	-3.71599	1948 01 1507
131.03	131	0.0229008	1948 02 1310
134.15	134.1	0.0372856	1948 03 1341
209.78	209.7	0.0381497	1948 04 2097
231.5	231.4	0.0432152	1948 05 2314
201.78	201.8	-0.0099108	1948 06 2018
188.72	188.7	0.0105988	1948 07 1887
177.18	177.2	-0.0112867	1948 08 1772
165.49	165.6	-0.0664251	1948 09 1656
157.98	158	-0.0126582	1948 10 1580
161.77	161.8	-0.0185414	1948 11 1618
187.22	187.3	-0.0427122	1948 12 1873
171.12	177.7	-3.70287	1949 01 1777
214.94	214.8	0.0651769	1949 02 2148
201.8	201.8	0	1949 03 2018
183.88	183.8	0.0435256	1949 04 1838
152.27	158.3	-3.80922	1949 05 1583
162.56	162.5	0.0369231	1949 06 1625
165.06	165.1	-0.0242277	1949 07 1651
179.45	179.5	-0.0278552	1949 08 1795
174.3	174.4	-0.0573394	1949 09 1744
177.14	177.2	-0.03386	1949 10 1772
176.42	176.5	-0.0453258	1949 11 1765
160.09	160.1	-0.0062461	1949 12 1601
145.95	145.9	0.03427	1950 01 1459
139.89	139.8	0.0643777	1950 02 1398
136.41	136.4	0.00733138	1950 03 1364
165.46	165.5	-0.0241692	1950 04 1655
160.5	160.5	0	1950 05 1605
132.82	132.8	0.0150602	1950 06 1328
131.19	138.5	-5.27798	1950 07 1385
123.87	123.9	-0.0242131	1950 08 1239
99.58	99.7	-0.120361	1950 09 997
94.72	99.3	-4.61229	1950 10 993
99.68	99.7	-0.0200602	1950 11 997
97.96	98	-0.0408163	1950 12 980
99.97	104.5	-4.33493	1951 01 1045
99.38	99.4	-0.0201207	1951 02 994
101.48	101.5	-0.0197044	1951 03 1015
122.41	128	-4.36719	1951 04 1280
172.43	172.5	-0.0405797	1951 05 1725
166.87	166.9	-0.0179748	1951 06 1669
120.18	120.2	-0.0166389	1951 07 1202
112.5	112.5	0	1951 08 1125
119.05	119.1	-0.0419815	1951 09 1191
105.26	105.3	-0.0379867	1951 10 1053
102.04	102.1	-0.0587659	1951 11 1021
95.22	99.2	-4.0121	1951 12 992
88.33	92.4	-4.40476	1952 01 924
84.12	84.2	-0.0950119	1952 02 842
74.25	77.8	-4.56298	1952 03 778
84.54	84.6	-0.070922	1952 04 846
82.68	82.7	-0.0241838	1952 05 827
84.63	87.5	-3.28	1952 06 875
91.7	91.7	0	1952 07 917
95.51	95.6	-0.0941423	1952 08 956
79.25	82.3	-3.70595	1952 09 823
82.19	82.4	-0.254854	1952 10 824
81.48	81.6	-0.147059	1952 11 816
82.99	83	-0.0120482	1952 12 830
77	80.5	-4.34783	1953 01 805
67.65	71.1	-4.85232	1953 02 711
66.21	69.7	-5.00717	1953 03 697
81.53	81.6	-0.0857843	1953 04 816
74.1	74.1	0	1953 05 741
75.3	75.3	0	1953 06 753
72.09	72.1	-0.0138696	1953 07 721
74.33	77.4	-3.96641	1953 08 774
75.05	75.1	-0.0665779	1953 09 751
71.41	71.5	-0.125874	1953 10 715
67.2	69.8	-3.72493	1953 11 698
68.53	68.6	-0.102041	1953 12 686
63.58	66.5	-4.39098	1954 01 665
67.44	67.5	-0.0888889	1954 02 675
71.11	71.1	0.0140647	1954 03 711
69.2	69.2	0	1954 04 692
66.84	69.5	-3.82734	1954 05 695
69.43	69.4	0.0432277	1954 06 694
69.96	70	-0.0571429	1954 07 700
71.59	71.6	-0.0139665	1954 08 716
70.83	70.9	-0.0987306	1954 09 709
72.64	72.7	-0.0825309	1954 10 727
70.97	71	-0.0422535	1954 11 710
73.08	73.1	-0.0273598	1954 12 731
78.64	81.6	-3.62745	1955 01 816
79.96	80	-0.05	1955 02 800
71.01	74	-4.04054	1955 03 740
77.81	77.9	-0.115533	1955 04 779
84.62	84.7	-0.094451	1955 05 847
91.65	91.7	-0.0545256	1955 06 917
90.16	90.2	-0.0443459	1955 07 902
92.91	93	-0.0967742	1955 08 930
96.09	96.1	-0.0104058	1955 09 961
110.98	111	-0.018018	1955 10 1110
127.17	127.2	-0.0235849	1955 11 1272
130.38	130.4	-0.0153374	1955 12 1304
132.25	136.6	-3.18448	1956 01 1366
163.28	163.2	0.0490196	1956 02 1632
159.09	159	0.0566038	1956 03 1590
161.04	167.2	-3.68421	1956 04 1672
167.08	167	0.0479042	1956 05 1670
158.91	158.9	0.00629327	1956 06 1589
162.32	168.1	-3.43843	1956 07 1681
198.54	198.6	-0.0302115	1956 08 1986
202.97	203.1	-0.0640079	1956 09 2031
200.23	200.3	-0.0349476	1956 10 2003
244.89	245	-0.044898	1956 11 2450
245.76	245.8	-0.0162734	1956 12 2458
216.64	223.8	-3.19929	1957 01 2238
182.26	182.2	0.0329308	1957 02 1822
195.86	195.8	0.0306435	1957 03 1958
201.46	201.4	0.0297915	1957 04 2014
213.23	213.2	0.0140713	1957 05 2132
260.18	260.2	-0.0076864	1957 06 2602
225.12	225.2	-0.035524	1957 07 2252
207.25	207.3	-0.0241196	1957 08 2073
269.82	269.9	-0.0296406	1957 09 2699
281.09	281.2	-0.0391181	1957 10 2812
253.48	253.5	-0.00788955	1957 11 2535
277.51	277.5	0.0036036	1957 12 2775
243.45	243.4	0.0205423	1958 01 2434
207.06	207	0.0289855	1958 02 2070
249.19	249.2	-0.00401284	1958 03 2492
247.54	247.5	0.0161616	1958 04 2475
223.46	223.5	-0.0178971	1958 05 2235
227.44	227.5	-0.0263736	1958 06 2275
231.35	231.4	-0.0216076	1958 07 2314
242.81	242.9	-0.0370523	1958 08 2429
246.15	246.2	-0.0203087	1958 09 2462
226.42	226.4	0.00883392	1958 10 2264
204.58	204.6	-0.00977517	1958 11 2046
230.81	230.8	0.00433276	1958 12 2308
265.73	265.7	0.0112909	1959 01 2657
202.91	202.8	0.0542406	1959 02 2028
226.98	227	-0.00881057	1959 03 2270
212.03	212	0.0141509	1959 04 2120
217.45	217.5	-0.0229885	1959 05 2175
224.38	224.4	-0.00891266	1959 06 2244
209.64	209.7	-0.0286123	1959 07 2097
239.95	240	-0.0208333	1959 08 2400
196.53	196.5	0.0152672	1959 09 1965
164.14	164.2	-0.0365408	1959 10 1642
180.73	180.7	0.0166021	1959 11 1807
176.54	176.6	-0.0339751	1959 12 1766
189.78	196.1	-3.22285	1960 01 1961
166.67	166.6	0.0420168	1960 02 1666
145.35	145.3	0.0344116	1960 03 1453
168.81	168.7	0.0652045	1960 04 1687
166.39	166.3	0.0541191	1960 05 1663
167.01	167	0.00598802	1960 06 1670
169.3	169.3	0	1960 07 1693
178.7	178.8	-0.0559284	1960 08 1788
166.19	166.3	-0.0661455	1960 09 1663
141.32	141.4	-0.0565771	1960 10 1414
145.63	145.7	-0.0480439	1960 11 1457
133.76	133.8	-0.0298954	1960 12 1338
118.05	118.1	-0.042337	1961 01 1181
103.8	103.8	0	1961 02 1038
103.79	103.8	-0.00963391	1961 03 1038
105.79	105.8	-0.0094518	1961 04 1058
101.55	101.6	-0.0492126	1961 05 1016
113.44	113.4	0.0352734	1961 06 1134
120.25	120.3	-0.0415628	1961 07 1203
108.86	108.9	-0.0367309	1961 08 1089
113.94	114	-0.0526316	1961 09 1140
96.02	96.1	-0.0832466	1961 10 961
88.29	88.3	-0.011325	1961 11 883
91.82	91.9	-0.0870511	1961 12 919
88.82	91.9	-3.35147	1962 01 919
99.76	99.7	0.0601805	1962 02 997
99.34	99.4	-0.0603622	1962 03 994
96.87	96.9	-0.0309598	1962 04 969
100.04	100.1	-0.0599401	1962 05 1001
93.85	93.9	-0.0532481	1962 06 939
80.42	83.3	-3.45738	1962 07 833
79.2	79.3	-0.126103	1962 08 793
90.41	90.5	-0.0994475	1962 09 905
87.18	87.2	-0.0229358	1962 10 872
82.96	83	-0.0481928	1962 11 830
79.42	79.4	0.0251889	1962 12 794
74.39	77	-3.38961	1963 01 770
77.72	77.8	-0.102828	1963 02 778
77.02	77.1	-0.103761	1963 03 771
79.94	80	-0.075	1963 04 800
89.68	89.7	-0.0222965	1963 05 897
86.16	86.2	-0.0464037	1963 06 862
78.41	78.4	0.0127551	1963 07 784
82.9	83	-0.120482	1963 08 830
85.98	86	-0.0232558	1963 09 860
84.47	84.5	-0.035503	1963 10 845
79.85	79.9	-0.0625782	1963 11 799
75.96	76	-0.0526316	1963 12 760
70.63	73	-3.24658	1964 01 730
74.92	75	-0.106667	1964 02 750
75.09	75.1	-0.0133156	1964 03 751
73.1	73.1	0	1964 04 731
71.02	71	0.028169	1964 05 710
71.25	71.2	0.0702247	1964 06 712
69.22	69.2	0.0289017	1964 07 692
71	71.1	-0.140647	1964 08 711
70.86	70.9	-0.0564175	1964 09 709
72.81	72.9	-0.123457	1964 10 729
72.06	72.1	-0.0554785	1964 11 721
76.31	76.4	-0.117801	1964 12 764
76.05	76.1	-0.065703	1965 01 761
73.36	73.4	-0.0544959	1965 02 734
73.35	73.4	-0.0681199	1965 03 734
72.51	72.6	-0.123967	1965 04 726
79.92	80	-0.1	1965 05 800
79.41	79.4	0.0125945	1965 06 794
76.78	76.8	-0.0260417	1965 07 768
76.55	76.6	-0.0652742	1965 08 766
77.31	77.4	-0.116279	1965 09 774
79.63	79.7	-0.0878294	1965 10 797
75.94	76	-0.0789474	1965 11 760
75.3	75.2	0.132979	1965 12 752
85.08	85.1	-0.0235018	1966 01 851
82.19	82.1	0.109622	1966 02 821
89.42	89.4	0.0223714	1966 03 894
97.84	97.8	0.0408998	1966 04 978
100.75	100.8	-0.0496032	1966 05 1008
99.35	99.4	-0.0503018	1966 06 994
110.13	110.2	-0.0635209	1966 07 1102
109.21	109.2	0.00915751	1966 08 1092
112.02	112	0.0178571	1966 09 1120
107.86	107.9	-0.0370714	1966 10 1079
110.83	110.8	0.0270758	1966 11 1108
120.69	120.7	-0.008285	1966 12 1207
143.04	143	0.027972	1967 01 1430
143.49	143.4	0.0627615	1967 02 1434
158.95	159	-0.0314465	1967 03 1590
130.78	130.8	-0.0152905	1967 04 1308
146.24	146.3	-0.0410116	1967 05 1463
124.01	124	0.00806452	1967 06 1240
144.88	144.9	-0.0138026	1967 07 1449
157.55	157.6	-0.0317259	1967 08 1576
133.5	133.5	0	1967 09 1335
135.15	135.1	0.0370096	1967 10 1351
142.1	142.1	0	1967 11 1421
157.94	157.9	0.0253325	1967 12 1579
183.07	183.1	-0.0163845	1968 01 1831
168.96	168.9	0.035524	1968 02 1689
141.26	141.2	0.0424929	1968 03 1412
130.42	130.4	0.0153374	1968 04 1304
158.41	158.4	0.00631313	1968 05 1584
146.81	146.8	0.00681199	1968 06 1468
141.63	141.7	-0.0494001	1968 07 1417
145.7	145.7	0	1968 08 1457
142.38	142.5	-0.0842105	1968 09 1425
151.36	151.4	-0.0264201	1968 10 1514
135.49	135.5	-0.00738007	1968 11 1355
143.79	143.8	-0.0069541	1968 12 1438
147.77	147.8	-0.0202977	1969 01 1478
151.56	151.5	0.039604	1969 02 1515
170.65	170.6	0.0293083	1969 03 1706
156.56	156.5	0.0383387	1969 04 1565
148.71	148.7	0.00672495	1969 05 1487
167.28	167.3	-0.0119546	1969 06 1673
141.07	141.1	-0.0212615	1969 07 1411
146.57	146.6	-0.0204638	1969 08 1466
138.72	138.7	0.0144196	1969 09 1387
152.89	152.9	-0.00654022	1969 10 1529
153.17	153.2	-0.0195822	1969 11 1532
139.13	139.1	0.0215672	1969 12 1391
153.24	153.2	0.0261097	1970 01 1532
171.28	171.2	0.046729	1970 02 1712
156.76	156.8	-0.0255102	1970 03 1568
163.06	163.1	-0.0245248	1970 04 1631
172.15	172.2	-0.029036	1970 05 1722
159.86	159.9	-0.0250156	1970 06 1599
156.96	157	-0.0254777	1970 07 1570
141.62	141.6	0.0141243	1970 08 1416
144.76	144.8	-0.0276243	1970 09 1448
147.25	147.3	-0.0339443	1970 10 1473
158.49	158.5	-0.00630915	1970 11 1585
147.99	148	-0.00675676	1970 12 1480
157.41	157.4	0.00635324	1971 01 1574
134.46	134.4	0.0446429	1971 02 1344
110.77	110.8	-0.0270758	1971 03 1108
117.48	117.5	-0.0170213	1971 04 1175
112.33	112.4	-0.0622776	1971 05 1124
104.88	104.9	-0.0190658	1971 06 1049
121.19	121.2	-0.00825083	1971 07 1212
116.9	116.9	0	1971 08 1169
105.13	105.1	0.0285442	1971 09 1051
106.46	106.4	0.056391	1971 10 1064
111.51	111.5	0.00896861	1971 11 1115
120.64	120.7	-0.04971	1971 12 1207
111.12	111.1	0.0180018	1972 01 1111
138.45	138.4	0.0361272	1972 02 1384
127.17	127.1	0.0550747	1972 03 1271
113.71	113.7	0.00879507	1972 04 1137
132.53	132.5	0.0226415	1972 05 1325
139.73	139.7	0.0214746	1972 06 1397
126	126	0	1972 07 1260
128.83	128.9	-0.0543057	1972 08 1289
114.83	114.9	-0.0609225	1972 09 1149
120.2	120.2	0	1972 10 1202
99.39	99.4	-0.0100604	1972 11 994
99.67	99.7	-0.0300903	1972 12 997
98.96	99	-0.040404	1973 01 990
96.3	96.3	0	1973 02 963
99.38	99.4	-0.0201207	1973 03 994
105.77	105.8	-0.0283554	1973 04 1058
99.15	99.1	0.0504541	1973 05 991
94.15	94.2	-0.0530786	1973 06 942
87.23	87.2	0.0344037	1973 07 872
84.93	84.9	0.0353357	1973 08 849
106.76	106.8	-0.0374532	1973 09 1068
87.14	87.1	0.0459242	1973 10 871
79.71	79.7	0.0125471	1973 11 797
81.54	81.5	0.0490798	1973 12 815
80.44	80.4	0.0497512	1974 01 804
78.9	78.9	0	1974 02 789
78.42	78.4	0.0255102	1974 03 784
86.69	86.7	-0.011534	1974 04 867
92.58	92.6	-0.0215983	1974 05 926
88.98	89	-0.0224719	1974 06 890
95.51	95.5	0.0104712	1974 07 955
85.08	85.1	-0.0235018	1974 08 851
88.71	88.7	0.011274	1974 09 887
97.07	97.1	-0.030896	1974 10 971
88.31	88.3	0.011325	1974 11 883
78.58	78.6	-0.0254453	1974 12 786
75.02	75	0.0266667	1975 01 750
72.38	72.4	-0.0276243	1975 02 724
71.64	71.7	-0.083682	1975 03 717
71.23	71.2	0.0421348	1975 04 712
71.61	71.6	0.0139665	1975 05 716
71.91	71.9	0.0139082	1975 06 719
79.71	79.7	0.0125471	1975 07 797
92.69	92.7	-0.0107875	1975 08 927
80.43	80.4	0.0373134	1975 09 804
75.27	75.3	-0.0398406	1975 10 753
79.08	79.1	-0.0252845	1975 11 791
72.28	72.3	-0.0276625	1975 12 723
72.35	72.4	-0.0690608	1976 01 724
68.86	68.8	0.0872093	1976 02 688
75.95	75.9	0.0658762	1976 03 759
76.84	76.8	0.0520833	1976 04 768
72.22	72.2	0.0277008	1976 05 722
72.81	72.8	0.0137363	1976 06 728
69.76	69.8	-0.0573066	1976 07 698
76.62	76.6	0.0261097	1976 08 766
73.85	73.9	-0.067659	1976 09 739
75.39	75.4	-0.0132626	1976 10 754
71.27	71.3	-0.0420757	1976 11 713
74.32	74.3	0.0269179	1976 12 743
74.96	74.9	0.0801068	1977 01 749
80.31	80.3	0.0124533	1977 02 803
75.79	75.8	-0.0131926	1977 03 758
78.17	78.2	-0.0383632	1977 04 782
81.43	81.4	0.036855	1977 05 814
94.44	94.5	-0.0634921	1977 06 945
83.7	83.7	0	1977 07 837
86.34	86.4	-0.0694444	1977 08 864
101.22	100.9	0.317146	1977 09 1009
96.3	96.3	0	1977 10 963
91.65	91.6	0.0545852	1977 11 916
98.9	98.9	0	1977 12 989
106.1	106.1	0	1978 01 1061
141.91	141.8	0.077574	1978 02 1418
140.27	140.3	-0.0213828	1978 03 1403
150.48	150.5	-0.013289	1978 04 1505
149.73	149.7	0.0200401	1978 05 1497
146.73	146.8	-0.0476839	1978 06 1468
135.38	135.4	-0.014771	1978 07 1354
116.89	116.9	-0.00855432	1978 08 1169
159.59	159.6	-0.00626566	1978 09 1596
157.15	157.1	0.0318269	1978 10 1571
148.27	148.2	0.0472335	1978 11 1482
170.04	170	0.0235294	1978 12 1700
196.53	196.5	0.0152672	1979 01 1965
199.17	199.1	0.0351582	1979 02 1991
183.95	184	-0.0271739	1979 03 1840
174.95	175	-0.0285714	1979 04 1750
168.83	168.9	-0.0414446	1979 05 1689
185.96	186	-0.0215054	1979 06 1860
171.39	171.4	-0.00583431	1979 07 1714
176.96	177	-0.0225989	1979 08 1770
202.29	202.3	-0.00494315	1979 09 2023
216.47	216.4	0.0323475	1979 10 2164
226.86	226.8	0.026455	1979 11 2268
197.22	197.2	0.010142	1979 12 1972
199.56	199.6	-0.0200401	1980 01 1996
195.09	195.1	-0.00512558	1980 02 1951
166.47	166.5	-0.018018	1980 03 1665
209.41	209.3	0.0525561	1980 04 2093
229.15	229.1	0.0218245	1980 05 2291
199.32	199.3	0.0100351	1980 06 1993
190.82	190.8	0.0104822	1980 07 1908
170.28	170.3	-0.011744	1980 08 1703
185.81	185.9	-0.0484131	1980 09 1859
202.84	202.9	-0.0295712	1980 10 2029
213.39	213.4	-0.00468604	1980 11 2134
220.31	218.8	0.690128	1980 12 2188
169.03	169	0.0177515	1981 01 1690
199.65	199.5	0.075188	1981 02 1995
203.22	203.2	0.00984252	1981 03 2032
224.74	224.7	0.0178015	1981 04 2247
198.94	198.9	0.0201106	1981 05 1989
161.86	161.9	-0.0247066	1981 06 1619
198.18	198.2	-0.0100908	1981 07 1982
225.94	226	-0.0265487	1981 08 2260
221.89	221.9	-0.00450653	1981 09 2219
222.81	222.8	0.00448833	1981 10 2228
203.33	203.3	0.0147565	1981 11 2033
201.36	201.4	-0.019861	1981 12 2014
173.37	173.4	-0.017301	1982 01 1734
209	208.9	0.0478698	1982 02 2089
208.3	208.3	0	1982 03 2083
162.95	162.9	0.0306937	1982 04 1629
147.89	147.9	-0.00676133	1982 05 1479
177.35	177.4	-0.0281849	1982 06 1774
164.81	164.8	0.00606796	1982 07 1648
172.06	172.1	-0.0232423	1982 08 1721
167.03	167.1	-0.0418911	1982 09 1671
160.86	160.9	-0.0248602	1982 10 1609
163.68	163.7	-0.0122175	1982 11 1637
193.17	193.2	-0.015528	1982 12 1932
137.75	137.7	0.0363108	1983 01 1377
119.63	119.6	0.0250836	1983 02 1196
117.29	117.3	-0.00852515	1983 03 1173
119.85	119.9	-0.0417014	1983 04 1199
140.11	140.2	-0.064194	1983 05 1402
143	143	0	1983 06 1430
129.1	129.1	0	1983 07 1291
127.54	127.5	0.0313725	1983 08 1275
110.2	110.2	0	1983 09 1102
111.78	111.8	-0.0178891	1983 10 1118
90.45	90.4	0.0553097	1983 11 904
90.53	90.5	0.0331492	1983 12 905
112.43	112.4	0.0266904	1984 01 1124
137.2	137.2	0	1984 02 1372
120.86	120.8	0.0496689	1984 03 1208
129.7	129.7	0	1984 04 1297
131.15	131.1	0.0381388	1984 05 1311
103.45	103.5	-0.0483092	1984 06 1035
92.18	92.2	-0.021692	1984 07 922
85.73	85.8	-0.0815851	1984 08 858
78.91	78.9	0.0126743	1984 09 789
73.05	73.1	-0.0683995	1984 10 731
74.58	74.6	-0.0268097	1984 11 746
73.48	73.5	-0.0272109	1984 12 735
72.09	72.1	-0.0138696	1985 01 721
71.89	71.9	-0.0139082	1985 02 719
72.54	72.5	0.0551724	1985 03 725
75.71	75.7	0.01321	1985 04 757
82.02	82	0.0243902	1985 05 820
78.48	78.5	-0.0254777	1985 06 785
81.28	81.3	-0.0246002	1985 07 813
73.25	73.3	-0.0682128	1985 08 733
70.22	70.2	0.02849	1985 09 702
74.17	74.2	-0.0404313	1985 10 742
72.61	72.6	0.0137741	1985 11 726
72.43	72.4	0.0414365	1985 12 724
70.91	70.9	0.0141044	1986 01 709
81.54	80.9	0.7911	1986 02 809
76.21	76.2	0.0131234	1986 03 762
75.6	75.6	0	1986 04 756
74.23	74.2	0.0404313	1986 05 742
69.73	69.7	0.0430416	1986 06 697
72.51	72.5	0.0137931	1986 07 725
70.07	70.1	-0.042796	1986 08 701
69.45	69.4	0.0720461	1986 09 694
82.38	82.4	-0.0242718	1986 10 824
75.48	75.5	-0.0264901	1986 11 755
70.36	70.4	-0.0568182	1986 12 704
70.19	70.2	-0.014245	1987 01 702
69.79	69.8	-0.0143266	1987 02 698
73.25	73.3	-0.0682128	1987 03 733
85.49	85.5	-0.0116959	1987 04 855
89.73	89.8	-0.077951	1987 05 898
80.41	80.4	0.0124378	1987 06 804
87	87	0	1987 07 870
92.22	92.2	0.021692	1987 08 922
87.03	87	0.0344828	1987 09 870
97.48	97.4	0.0821355	1987 10 974
99.03	99	0.030303	1987 11 990
91.46	91.5	-0.0437158	1987 12 915
104.56	104.6	-0.0382409	1988 01 1046
102.43	102.4	0.0292969	1988 02 1024
113.84	113.8	0.0351494	1988 03 1138
123.55	123.6	-0.0404531	1988 04 1236
117.85	117.9	-0.0424088	1988 05 1179
143.81	143.8	0.0069541	1988 06 1438
157.65	157.6	0.0317259	1988 07 1576
158.04	158	0.0253165	1988 08 1580
154.11	154.1	0.00648929	1988 09 1541
168.72	168.7	0.0118554	1988 10 1687
152.77	152.8	-0.0196335	1988 11 1528
193.51	193.5	0.00516796	1988 12 1935
227.84	227.8	0.0175593	1989 01 2278
216.96	217	-0.0184332	1989 02 2170
203.02	203	0.00985222	1989 03 2030
190.93	190.9	0.015715	1989 04 1909
194.4	194.4	0	1989 05 1944
247.2	247.2	0	1989 06 2472
187.81	187.8	0.00532481	1989 07 1878
222.53	222.5	0.0134831	1989 08 2225
228.41	228.4	0.00437828	1989 09 2284
207.35	207.4	-0.024108	1989 10 2074
230	230	0	1989 11 2300
206.35	206.3	0.0242365	1989 12 2063
203.41	203.4	0.00491642	1990 01 2034
174.09	174.1	-0.00574383	1990 02 1741
186.99	187	-0.00534759	1990 03 1870
186.62	186.6	0.0107181	1990 04 1866
193.99	194	-0.00515464	1990 05 1940
176.34	176.3	0.0226886	1990 06 1763
186.61	186.6	0.00535906	1990 07 1866
228.09	228.1	-0.00438404	1990 08 2281
179.27	179.3	-0.0167317	1990 09 1793
180.85	180.9	-0.0276396	1990 10 1809
180.26	180.3	-0.0221852	1990 11 1803
198.54	198.5	0.0201511	1990 12 1985
222.11	222.1	0.00450248	1991 01 2221
237.2	237.2	0	1991 02 2372
227.63	227.6	0.013181	1991 03 2276
200.07	200.1	-0.0149925	1991 04 2001
194.51	194.5	0.00514139	1991 05 1945
213.33	213.3	0.0140647	1991 06 2133
218.89	218.9	-0.0045683	1991 07 2189
215.52	215.5	0.00928074	1991 08 2155
182.54	182.5	0.0219178	1991 09 1825
199.97	200	-0.015	1991 10 2000
168.34	168.3	0.0237671	1991 11 1683
216.95	217	-0.0230415	1991 12 2170
210.65	210.6	0.0237417	1992 01 2106
226.46	226.5	-0.01766	1992 02 2265
169.65	169.6	0.0294811	1992 03 1696
159.68	159.7	-0.0125235	1992 04 1597
128.15	128.2	-0.0390016	1992 05 1282
120.43	120.4	0.0249169	1992 06 1204
136.5	136.5	0	1992 07 1365
125.12	125.1	0.0159872	1992 08 1251
118.02	118	0.0169492	1992 09 1180
130.73	130.8	-0.0535168	1992 10 1308
142.03	142	0.0211268	1992 11 1420
134.74	134.7	0.0296956	1992 12 1347
117.16	117.2	-0.0341297	1993 01 1172
139.14	139.1	0.0287563	1993 02 1391
135.01	135	0.00740741	1993 03 1350
116.67	116.7	-0.0257069	1993 04 1167
114.86	114.9	-0.0348129	1993 05 1149
112.77	112.8	-0.0265957	1993 06 1128
102.22	102.2	0.0195695	1993 07 1022
95.98	96	-0.0208333	1993 08 960
87.9	87.9	0	1993 09 879
99.68	99.7	-0.0200602	1993 10 997
93.81	93.8	0.010661	1993 11 938
101.52	101.5	0.0197044	1993 12 1015
111.33	111.3	0.0269542	1994 01 1113
97.17	97.2	-0.0308642	1994 02 972
89.5	89.5	0	1994 03 895
79.67	79.7	-0.0376412	1994 04 797
81.67	81.7	-0.0367197	1994 05 817
79.75	79.7	0.0627353	1994 06 797
83.15	83.2	-0.0600962	1994 07 832
78	78	0	1994 08 780
79.91	79.9	0.0125156	1994 09 799
87.12	87.1	0.0229621	1994 10 871
79.14	79.1	0.0505689	1994 11 791
81.48	74.8	8.93048	1994 12 748
80.02	80	0.025	1995 01 800
83.49	83.5	-0.011976	1995 02 835
84.19	84.2	-0.0118765	1995 03 842
78.21	78.2	0.0127877	1995 04 782
77.14	77.1	0.0518807	1995 05 771
78.1	78.1	0	1995 06 781
76.33	76.3	0.0393185	1995 07 763
75.65	75.7	-0.0660502	1995 08 757
72.75	72.8	-0.0686813	1995 09 728
77.45	77.5	-0.0645161	1995 10 775
72.58	72.6	-0.0275482	1995 11 726
70.28	70.3	-0.0284495	1995 12 703
72.13	72.1	0.0416089	1996 01 721
70.28	69.8	0.687679	1996 02 698
69.99	70	-0.0142857	1996 03 700
69.94	69.9	0.0572246	1996 04 699
71.7	71.7	0	1996 05 717
72.07	71.8	0.376045	1996 06 718
73.81	73.5	0.421769	1996 07 735
74.28	74.2	0.107817	1996 08 742
70.18	70.1	0.114123	1996 09 701
68.78	68.7	0.116448	1996 10 687
77.27	76.9	0.481144	1996 11 769
73.33	75.3	-2.6162	1996 12 753
71.25	71.6	-0.488827	1997 01 716
71.89	72	-0.152778	1997 02 720
72.53	72.8	-0.370879	1997 03 728
75.08	74	1.45946	1997 04 740
76.43	76.3	0.17038	1997 05 763
74.18	74	0.243243	1997 06 740
73.57	73.4	0.231608	1997 07 734
81.03	81	0.037037	1997 08 810
97.11	97.2	-0.0925926	1997 09 972
84.45	84.3	0.177936	1997 10 843
96.81	97.4	-0.605749	1997 11 974
93.91	95.7	-1.87043	1997 12 957
89.74	90.4	-0.730088	1998 01 904
90.99	91.1	-0.120746	1998 02 911
108.03	108	0.0277778	1998 03 1080
114.87	109	5.38532	1998 04 1090
109.5	109	0.458716	1998 05 1090
112	111.8	0.178891	1998 06 1118
117.6	117.7	-0.0849618	1998 07 1177
143.33	139.4	2.81923	1998 08 1394
139.55	139.8	-0.178827	1998 09 1398
116.99	116.6	0.334477	1998 10 1166
136.87	137.1	-0.167761	1998 11 1371
145.5	145.5	0	1998 12 1455
137.22	138.1	-0.637219	1999 01 1381
139.48	138.6	0.634921	1999 02 1386
120.75	124.9	-3.32266	1999 03 1249
118.07	118	0.059322	1999 04 1180
151.61	151.9	-0.190915	1999 05 1519
175.33	175.2	0.0742009	1999 06 1752
170.05	171	-0.555556	1999 07 1710
174.12	175	-0.502857	1999 08 1750
137.25	137.2	0.0364431	1999 09 1372
164.24	163.7	0.329872	1999 10 1637
187.74	187.4	0.18143	1999 11 1874
165.06	164.5	0.340426	1999 12 1645
153.65	153.1	0.359242	2000 01 1531
168.64	169.1	-0.272028	2000 02 1691
206.77	206.1	0.325085	2000 03 2061
185.49	185.5	-0.00539084	2000 04 1855
195.38	188.7	3.54001	2000 05 1887
186.07	185.5	0.307278	2000 06 1855
212.21	211.4	0.38316	2000 07 2114
167.63	167.2	0.257177	2000 08 1672
184.56	183.8	0.413493	2000 09 1838
167.07	166.6	0.282113	2000 10 1666
176.64	174.9	0.994854	2000 11 1749
168.28	168.2	0.0475624	2000 12 1682
162.16	161.3	0.533168	2001 01 1613
143.18	143.1	0.055905	2001 02 1431
176.57	176.1	0.266894	2001 03 1761
193.73	179.3	8.04796	2001 04 1793
150.79	152	-0.796053	2001 05 1520
179.64	179.2	0.245536	2001 06 1792
136.01	135.6	0.30236	2001 07 1356
170.92	167.1	2.28606	2001 08 1671
236.47	236.2	0.11431	2001 09 2362
209.06	206.6	1.19071	2001 10 2066
209.93	208.1	0.879385	2001 11 2081
233.62	228.2	2.37511	2001 12 2282
220.38	220.1	0.127215	2002 01 2201
200.27	200.1	0.0849575	2002 02 2001
178.88	178.4	0.269058	2002 03 1784
191.41	191.1	0.162219	2002 04 1911
183.45	182.4	0.575658	2002 05 1824
154.09	153.4	0.449804	2002 06 1534
182.42	179.2	1.79688	2002 07 1792
188.15	188.4	-0.132696	2002 08 1884
178.27	177.8	0.264342	2002 09 1778
166.78	165.9	0.53044	2002 10 1659
165.74	165.1	0.387644	2002 11 1651
152.59	152.3	0.190414	2002 12 1523
139.13	139.4	-0.193687	2003 01 1394
121.54	121.4	0.115321	2003 02 1214
130.9	130.8	0.0764526	2003 03 1308
122.4	127.2	-3.77358	2003 04 1272
126.46	118.7	6.53749	2003 05 1187
137.09	133.4	2.76612	2003 06 1334
132.22	131.9	0.242608	2003 07 1319
125.24	125.2	0.0319489	2003 08 1252
113.84	113.4	0.388007	2003 09 1134
155.43	150.1	3.55097	2003 10 1501
145.64	137.7	5.76616	2003 11 1377
111.88	111.4	0.43088	2003 12 1114
110.24	110.4	-0.144928	2004 01 1104
104.44	104.4	0.0383142	2004 02 1044
111.21	111	0.189189	2004 03 1110
101.81	101.9	-0.0883219	2004 04 1019
102.29	102.1	0.186092	2004 05 1021
100.1	100.5	-0.39801	2004 06 1005
124.14	122.4	1.42157	2004 07 1224
112.45	112.7	-0.221828	2004 08 1127
105.55	104.1	1.39289	2004 09 1041
105.15	105.1	0.0475737	2004 10 1051
113.33	111.2	1.91547	2004 11 1112
92.28	92.1	0.19544	2004 12 921
99.59	99	0.59596	2005 01 990
94.95	94.9	0.052687	2005 02 949
89.14	89	0.157303	2005 03 890
86.55	86.6	-0.0577367	2005 04 866
103.9	101.7	2.16323	2005 05 1017
97.06	96.6	0.47619	2005 06 966
103.93	99.6	4.34739	2005 07 996
100.66	92.8	8.46983	2005 08 928
110.77	92.1	20.2714	2005 09 921
76.21	76.1	0.144547	2005 10 761
84.47	84.4	0.0829384	2005 11 844
88.01	87.9	0.125142	2005 12 879
80.67	80.8	-0.160891	2006 01 808
74.67	74.7	-0.0401606	2006 02 747
74.75	74.7	0.0669344	2006 03 747
89.9	89.6	0.334821	2006 04 896
82.62	82.7	-0.0967352	2006 05 827
79.1	79	0.126582	2006 06 790
78.36	78.3	0.0766284	2006 07 783
81.58	81.4	0.22113	2006 08 814
78.87	78.6	0.343511	2006 09 786
73.95	73.8	0.203252	2006 10 738
84.56	84.4	0.189573	2006 11 844
87.58	81.9	6.93529	2006 12 819
81.09	80.8	0.358911	2007 01 808
75.76	75.8	-0.0527704	2007 02 758
71.5	71.5	0	2007 03 715
72.87	72.9	-0.0411523	2007 04 729
75.98	76	-0.0263158	2007 05 760
76.39	76	0.513158	2007 06 760
73.83	74	-0.22973	2007 07 740
70.76	70.9	-0.197461	2007 08 709
67.71	67.8	-0.132743	2007 09 678
67.27	67.1	0.253353	2007 10 671
67.88	68.1	-0.323054	2007 11 681
75.77	76.1	-0.43364	2007 12 761
71.66	71.9	-0.333797	2008 01 719
69.33	69.4	-0.100865	2008 02 694
72.3	72.2	0.138504	2008 03 722
70.65	70.7	-0.0707214	2008 04 707
69.86	69.9	-0.0572246	2008 05 699
67.94	68	-0.0882353	2008 06 680
67.82	67.8	0.0294985	2008 07 678
67.81	68	-0.279412	2008 08 680
67.7	67.8	-0.147493	2008 09 678
67.75	67.8	-0.0737463	2008 10 678
67.02	67.1	-0.119225	2008 11 671
66.89	67	-0.164179	2008 12 670
67.48	67.6	-0.177515	2009 01 676
68.17	68.3	-0.190337	2009 02 683
68.42	68.6	-0.262391	2009 03 686
70.11	70.3	-0.27027	2009 04 703
71.91	72.1	-0.263523	2009 05 721
70.74	70.8	-0.0847458	2009 06 708
70.41	70.4	0.0142045	2009 07 704
69.04	69	0.057971	2009 08 690
71.05	71.2	-0.210674	2009 09 712
71.66	71.8	-0.194986	2009 10 718
72.05	72	0.0694444	2009 11 720
74.44	74.4	0.0537634	2009 12 744
78.71	78.5	0.267516	2010 01 785
82.7	82.7	0	2010 02 827
82.12	82.5	-0.460606	2010 03 825
76.24	76.5	-0.339869	2010 04 765
75.26	75.4	-0.185676	2010 05 754
74.67	74.8	-0.173797	2010 06 748
82.2	82.4	-0.242718	2010 07 824
81.15	81.5	-0.429448	2010 08 815
81.81	81.9	-0.10989	2010 09 819
80.89	81.2	-0.381773	2010 10 812
80.77	80.7	0.086741	2010 11 807
81.59	81.6	-0.0122549	2010 12 816
80.73	80.8	-0.0866337	2011 01 808
92.26	92.3	-0.0433369	2011 02 923
122.91	114.6	7.25131	2011 03 1146
113.61	113.3	0.27361	2011 04 1133
97.79	97.9	-0.11236	2011 05 979
98.88	98.8	0.0809717	2011 06 988
97.43	97.2	0.236626	2011 07 972
104.16	104.3	-0.134228	2011 08 1043
136.68	135.9	0.573951	2011 09 1359	ADJUSTED	DIFFERENCE
136.52	136.3	0.161409	2011 10 1363	FLUX	STAR
150.23	149.8	0.287049	2011 11 1498	STAR	WDCs
137.07	136.8	0.197368	2011 12 1368
130.49	128.9	1.23351	2012 01 1289	128.1	0.8
104.29	104.2	0.0863724	2012 02 1042	104	0.2
114.53	113.8	0.641476	2012 03 1138	113.5	0.3
114.14	113.9	0.210711	2012 04 1139	113.9	0
124.12	124.2	-0.0644122	2012 05 1242	124	0.2
124.19	124.7	-0.408982	2012 06 1247	123.4	1.3
142.31	140.5	1.28826	2012 07 1405	138.5	2
118.75	118.6	0.126476	2012 08 1186	118.3	0.3
124.7	124.3	0.321802	2012 09 1243	124.3	0
122.22	122.4	-0.147059	2012 10 1224	122.4	0
118.45	118.3	0.126796	2012 11 1183	118.3	0
104.87	105	-0.12381	2012 12 1050	105	0
122.78	123	-0.178862	2013 01 1230	123.1	-0.1
101.9	101.7	0.196657	2013 02 1017	101.8	-0.1
110.22	110.1	0.108992	2013 03 1101	110.2	-0.1
125.84	126	-0.126984	2013 04 1260	125.9	0.1
134.33	134.2	0.0968703	2013 05 1342	134.3	-0.1
114.25	113.6	0.572183	2013 06 1136	113.7	-0.1
119.29	119.2	0.0755034	2013 07 1192	119.3	-0.1
117.75	118.3	-0.46492	2013 08 1183	118.3	0
103.91	103.6	0.299228	2013 09 1036	103.7	-0.1
131.92	131.5	0.319392	2013 10 1315	131.2	0.3
145.55	145.1	0.310131	2013 11 1451	145.1	0
143.49	143.1	0.272537	2013 12 1431	143.1	0
157.5	155	1.6129	2014 01 1550	152.4	2.6
166.01	166.1	-0.0541842	2014 02 1661	166.3	-0.2
148.97	148.3	0.451787	2014 03 1483	148.5	-0.2
144.92	145.2	-0.192837	2014 04 1452	144.8	0.4
132.95	133	-0.037594	2014 05 1330	132.9	0.1
126.22	126	0.174603	2014 06 1260	125.8	0.2
142.4	141.8	0.423131	2014 07 1418	141.8	0
127.67	128.3	-0.491037	2014 08 1283	127.9	0.4
148.12	149.3	-0.790355	2014 09 1493	148.1	1.2
153.91	154	-0.0584416	2014 10 1540	152.9	1.1
152.3	151.2	0.727513	2014 11 1512	151.4	-0.2
154.07	153.9	0.110461	2014 12 1539	153.8	0.1
137.48	137	0.350365	2015 01 1370	137.3	-0.3
125.77	125.7	0.0556881	2015 02 1257	126	-0.3
125.58	125	0.464	2015 03 1250	124.6	0.4
129.93	129.9	0.0230947	2015 04 1299	129.7	0.2
122.65	122.5	0.122449	2015 05 1225	122.6	-0.1
132.6	130.7	1.45371	2015 06 1307	126.1	4.6
110.5	110.5	0	2015 07 1105	110.8	0.352381
108.59	109.1	-0.467461	2015 08 1091	108
103.04	103	0.038835	2015 09 1030	102.7
103.3	103.3	0	2015 10 1033	103.3
107.32	107.1	0.205415	2015 11 1071	106.9
109.02	109.1	-0.0733272	2015 12 1091	109.5
100.33	100.1	0.22977	2016 01 1001	100.1
101.17	101	0.168317	2016 02 1010	101
90.5	90.5	0	2016 03 905	90.6
94.12	94.1	0.021254	2016 04 941	94
95.47	95.2	0.283613	2016 05 952	95.3
84.55	84.5	0.0591716	2016 06 845	84.5
89.12	88.7	0.473506	2016 07 887	88.9
87.25	87	0.287356	2016 08 870	87.1
88.39	88.6	-0.23702	2016 09 886	88.7
85.61	85.5	0.128655	2016 10 855	85.6
76.85	76.8	0.0651042	2016 11 768	76.9
72.94	72.7	0.330124	2016 12 727	72.8
74.91	74.8	0.147059	2017 01 748	74.9
75.11	75	0.146667	2017 02 750	75
73.95	73.8	0.203252	2017 03 738	73.9
81.46	81.6	-0.171569	2017 04 816	80.8
75.25	75.2	0.0664894	2017 05 752	75.2
77.19	77	0.246753	2017 06 770	77.1
80.11	80.1	0.0124844	2017 07 801	79.9
80.18	79.8	0.47619	2017 08 798	79.8
96.55	94.4	2.27754	2017 09 944	92.3
75.9	75.9	0	2017 10 759	75.6
70.7	70.6	0.141643	2017 11 706	70.6
69.46	69.3	0.23088	2017 12 693	69.3
67.78	67.7	0.118168	2018 01 677	67.7
69.96	70.2	-0.34188	2018 02 702	70.2
67.58	67.5	0.118519	2018 03 675	67.6
70.45				70.5
72.53				72.4
74.95				74.7
71.88				72.3
70.78				70.8
68.9				69
69.12				69.1
67.52				67.4
67.86				67.8
69.29				69.2
				68.9
