# Supplementary material for: Calculating the Strength of Solar Cycle 25: 365-Day High-Resolution Sunspot Smoothing and its Relationship with the 10.7cm Solar Flux
Source: Research Square preprint supplement (doi:10.21203/rs.3.rs-5148729/v1), 2025-03-25
Supplement: Supplementary file 4 [file 8e85dd6269103682c6b74980.xlsx]

## Sheet: ADJ FLUX
			WOLF	FITTED	ADJUSTED		%E/F	ISN	2K	1K	NOAA		FITTED	ADJUSTED	%N/O		FITTED	ADJUSTED	%R/S		FITTED	ADJUSTED	%V/W		FITTED	ADJUSTED	%Z/AA		FITTED	ADJUSTED	%AG/AH		FORMULA	ADJUSTED	%AH/AI		Fitted	%		ADJUSTED	%AI/AO		OBSERVED	OBSERVED	%AR/AS
			SUNSPOT	WOLF	FLUX		Difference	MEAN			from		2K	FLUX	Difference		1K	FLUX	Difference		NOAA	FLUX	Difference		MEAN	FLUX	Difference		1K+2K	FLUX	Difference		TAPPING	FLUX	Difference		above	difference		FLUX	Difference		FLUX	FLUX	Difference
			NUMBER	NUMBER	STAR		Fitted/	SUNSPOT			NOAA			STAR	Fitted/			STAR	Fitted/		from	STAR	Fitted/		ISN	STAR	Fitted/			STAR	Fitted/			PENTICTON	Fitted/		FLUX	FITTED/		SOLEN	SOLEN/			SOLEN	SOLEN/
							Adjusted	NUMBER							Adjusted				Adjusted		NOAA		Adjusted				Adjusted				Adjusted				Adjusted		100	ADJUSTED			Adjusted				Observed
2012	1	2012	55.8	117.398	128.1	5	-8.35412	94.4	152	100.2	91.3	5	113.552	128.1	-11.3568		114.1	128.1	-10.929		125.719	128.1	-1.85886	5	123.944	128.1	-3.24434		113.826	128.1	-11.1429	5	120.7	130.49	-7.50249		120.7	128.1					134.79	132.5	1.7283
2012	2		29.2	91.9432	104		-11.593	47.8	95.2	61.8	50.1		95.0352	104	-8.62		94.9	104	-8.75		97.8676	104	-5.89654		94.353	104	-9.27596		94.9676	104	-8.685		90.7	104.29	-13.031		90.7	104					106.86	106.5	0.338028
2012	3		53.1	114.815	113.5		1.15822	86.6	146.3	96.6	77.9		111.694	113.5	-1.59137		112.3	113.5	-1.05727		116.66	113.5	2.78449		118.991	113.5	4.83789		111.997	113.5	-1.32432		115.5	114.53	0.84694		115.5	113.5					115.71	114.7	0.880558
2012	4		51.4	113.188	113.9		-0.625335	85.9	162.4	104.6	84.4		116.942	113.9	2.67112		116.3	113.9	2.10711		121.054	113.9	6.2813		118.547	113.9	4.07946		116.621	113.9	2.38911		115.1	114.14	0.841072		115.1	113.9					113.26	113	0.230088
2012	5		61.8	123.14	124		-0.693445	96.5	204.7	136.3	99.5		130.732	124	5.42919		132.15	124	6.57258		131.262	124	5.85645		125.278	124	1.03024		131.441	124	6.00089		122	124.12	-1.70802		122	124					121.4	121.5	-0.0823045
2012	6		59.7	121.131	123.4		-1.83913	92	180.3	120.6	88.6		122.778	123.4	-0.504214		124.3	123.4	0.729335		123.894	123.4	0.4		122.42	123.4	-0.794165		123.539	123.4	0.112561		119.1	124.19	-4.09856		119.1	123.4					120.4	119.6	0.668896
2012	7		64.2	125.437	138.5		-9.43189	100.1	197.3	126.9	99.6		128.32	138.5	-7.35032		127.45	138.5	-7.97834	-2.58851	131.33	138.5	-5.17718		127.564	138.5	-7.89639	-1.34328	127.885	138.5	-7.66433		124.4	142.31	-12.5852		124.4	138.5					137.81	133.9	2.92009
2012	8		57.7	119.217	118.3		0.774803	94.8	151.2	106.6	85.8		113.291	118.3	-4.23398	-1.82116	117.3	118.3	-0.845309	-1.73462	122.001	118.3	3.12832		124.198	118.3	4.98563	-0.720826	115.296	118.3	-2.53964		120.9	118.75	1.81053		120.9	118.3					115.86	115.4	0.398614
2012	9		57.7	119.217	124.3		-4.08963	93.7	175.3	114.1	84		121.148	124.3	-2.53596	-1.09117	121.05	124.3	-2.61464	-1.31386	120.784	124.3	-2.82864		123.5	124.3	-0.644006	-0.367126	121.099	124.3	-2.5753		120.2	124.7	-3.60866		120.2	124.3					123.4	122.9	0.406835
2012	10		48.3	110.221	122.4		-9.95003	76.5	148.3	92.4	73.5		112.346	122.4	-8.21422	-0.699716	110.2	122.4	-9.96732	-1.2465	113.686	122.4	-7.11928		112.578	122.4	-8.02492	-0.399207	111.273	122.4	-9.09077		108.9	122.22	-10.8984		108.9	122.4					123.07	123.3	-0.186537
2012	11		56.7	118.26	118.3		-0.0341234	87.6	167.5	106.5	89.2		118.605	118.3	0.257819	-0.732106	117.25	118.3	-0.887574	-1.53617	124.299	118.3	5.07117		119.626	118.3	1.12088	-0.218759	117.928	118.3	-0.314877		116.2	118.45	-1.89954		116.2	118.3		118.3	0.126796
2012	12		37.4	99.7903	105		-4.96162	56.8	121.1	75.3	60.4		103.479	105	-1.44895	-0.727274	101.65	105	-3.19048	-2.01874	104.83	105	-0.161524		100.068	105	-4.69714	-0.0780887	102.564	105	-2.31971		96.2	104.87	-8.26738		96.2	105		105	-0.12381
2013	1	2013	63.8	125.054	123.1	5	1.58737	96.1	177	119.6	99.8	5	121.702	123.1	-1.13566	-0.0259948	123.8	123.1	0.568643	-2.02543	131.465	123.1	6.79513	5	125.023	123.1	1.56255	0.227873	122.751	123.1	-0.283509	5	121.8	122.78	-0.798176		121.8	123.1		123.1	-0.259951
2013	2		37.8	100.173	101.8		-1.59815	60.9	122.9	76.1	60		104.065	101.8	2.22534	0.884091	102.05	101.8	0.24558	-1.84479	104.56	101.8	2.7112		102.672	101.8	0.85609	0.47013	103.058	101.8	1.23546		98.8	101.9	-3.0422		98.8	101.8		101.8	0.0982318
2013	3		50.6	112.422	110.2		2.01649	78.3	158.9	92.5	81		115.801	110.2	5.08294	1.45028	110.25	110.2	0.0453721	-1.92693	118.756	110.2	7.76407		113.721	110.2	3.19465	0.22525	113.026	110.2	2.56416		110.1	110.22	-0.108873		110.1	110.2		110.2	0.0181488
2013	4		70.6	131.561	125.9		4.49672	107.3	210.7	130.4	112.8		132.688	125.9	5.39174	2.06523	129.2	125.9	2.62113	-1.50798	140.253	125.9	11.4002		132.135	125.9	4.95274	0.55473	130.944	125.9	4.00643		129.2	125.84	2.67006		129.2	125.9		125.9	-0.0476569
2013	5		77.4	138.069	134.3		2.80618	120.2	223.6	138.2	125.5		136.894	134.3	1.9312	2.35057	133.1	134.3	-0.893522	-1.17948	148.838	134.3	10.825		140.327	134.3	4.48771	0.763351	134.997	134.3	0.518838		137.7	134.33	2.50875		137.7	134.3		134.3	0.022338
2013	6		51	112.805	113.7		-0.787194	76.7	163.3	91.7	80.1		117.236	113.7	3.10976	2.55638	109.85	113.7	-3.3861	-1.06319	118.148	113.7	3.9117		112.704	113.7	-0.87555	0.65364	113.543	113.7	-0.138171		109	114.25	-4.59519		109	113.7		113.7	0.483729
2013	7		57	118.547	119.3		-0.631417	86.2	191.1	101	86.1		126.299	119.3	5.86639	2.91393	114.5	119.3	-4.02347	-0.646825	122.204	119.3	2.43386		118.737	119.3	-0.47192	0.391828	120.399	119.3	0.921459		115.2	119.29	-3.42862		115.2	119.3		119.3	-0.00838223
2013	8		60	121.418	118.3		2.63533	91.8	182.5	107.5	90.2		123.495	118.3	4.39138	2.97179	117.75	118.3	-0.46492	-0.332447	124.975	118.3	5.6426		122.293	118.3	3.37532	-0.333272	120.623	118.3	1.96323		118.9	117.75	0.976645		118.9	118.3		118.3	-0.46492
2013	9		34.6	97.1108	103.7		-6.35408	54.5	129.5	69.1	55.1		106.217	103.7	2.42719	3.07706	98.55	103.7	-4.96625	0.37906	101.248	103.7	-2.3649		98.6075	103.7	-4.9108	-0.818616	102.383	103.7	-1.26953		94.8	103.91	-8.7672		94.8	103.7		103.7	0.202507
2013	10		74.5	135.294	131.2		3.12006	114.4	212.5	140.8	127.1		133.275	131.2	1.58155	2.98264	134.4	131.2	2.43902	0.992995	149.92	131.2	14.268		136.644	131.2	4.14939	-1.50538	133.838	131.2	2.01029		133.9	131.92	1.50091		133.9	131.2		131.2	0.54878
2013	11		73.9	134.719	145.1		-7.15414	113.9	236.8	146.5	125.7		141.197	145.1	-2.69001	3.0079	137.25	145.1	-5.41006	1.62918	148.973	145.1	2.66933		136.327	145.1	-6.04652	-2.08858	139.223	145.1	-4.05003		133.6	145.55	-8.21024		133.6	145.1		145.1	0.310131
2013	12		77.8	138.451	143.1		-3.24844	124.2	270.9	170	118.2		152.313	143.1	6.43843	3.15995	149	143.1	4.12299	2.65403	143.903	143.1	0.561286		142.867	143.1	-0.162823	-2.04223	150.657	143.1	5.28071		140.4	143.49	-2.15346		140.4	143.1		143.1	0.272537
2014	1	2014	77.4	138.069	152.4	5	-9.40374	117	269.1	186.7	125.9	5	151.727	152.4	-0.441864	2.76859	157.35	152.4	3.24803	3.32285	149.108	152.4	-2.15984	5	138.295	152.4	-9.25525	-2.28525	154.538	152.4	1.40308	5	135.6	157.5	-13.9048		135.6	152.4		152.4	3.34646
2014	2		93.9	153.859	166.3		-7.48133	146.1	328.7	221.6	174.6		171.156	166.3	2.92014	2.3156	174.8	166.3	5.11124	3.65893	182.03	166.3	9.45857		156.774	166.3	-5.7285	-2.69298	172.978	166.3	4.01569		154.8	166.01	-6.75261		154.8	166.3		166.3	-0.174384
2014	3		80.9	141.418	148.5		-4.76898	128.7	290.7	205.4	141.1		158.768	148.5	6.91461	2.03299	166.7	148.5	12.2559	4.10149	159.384	148.5	7.32902		145.724	148.5	-1.86902	-2.5429	162.734	148.5	9.58525		143.3	148.97	-3.80614		143.3	148.5		148.5	0.316498
2014	4		76.9	137.59	144.8		-4.97913	112.5	253.6	176.5	130.5		146.674	144.8	1.29392	1.26236	152.25	144.8	5.14503	3.86441	152.218	144.8	5.12293		135.438	144.8	-6.46581	-3.42	149.462	144.8	3.21948		132.6	144.92	-8.50124		132.6	144.8		144.8	0.0828729
2014	5		72.3	133.188	132.9		0.216861	112.5	238.4	169.3	116.8		141.718	132.9	6.63536	0.601436	148.65	132.9	11.851	3.43641	142.957	132.9	7.56719		135.438	132.9	1.90933	-4.80101	145.184	132.9	9.24319		132.6	132.95	-0.263257		132.6	132.9		132.9	0.0376223
2014	6		67.2	128.308	125.8		1.99341	102.9	197.5	144.9	107.7		128.385	125.8	2.05485	-0.04028	136.45	125.8	8.46582	3.11814	136.805	125.8	8.74817		129.341	125.8	2.81518	-5.62771	132.417	125.8	5.26033		126.3	126.22	0.0633814		126.3	125.8		125.8	0.333863
2014	7		72.5	133.38	141.8		-5.93822	100.2	227.9	156.1	113.6		138.295	141.8	-2.47151	-0.797542	142.05	141.8	0.176305	2.48292	140.794	141.8	-0.709732		127.627	141.8	-9.99506	-6.15817	140.173	141.8	-1.1476		124.5	142.4	-12.5702		124.5	141.8		141.8	0.423131
2014	8		71.2	132.136	127.9		3.31161	106.9	203.3	136.5	106.2		130.276	127.9	1.85754	-1.29705	132.25	127.9	3.40109	1.91626	135.791	127.9	6.16982		131.882	127.9	3.11298	-6.61579	131.263	127.9	2.62932		128.9	127.67	0.963421		128.9	127.9		127.9	-0.179828
2014	9		83.2	143.619	148.1		-3.02561	130	249.7	173.5	127.4		145.402	148.1	-1.82161	-2.10335	150.75	148.1	1.78933	0.943258	150.122	148.1	1.36556		146.55	148.1	-1.04659	-7.81808	148.076	148.1	-0.0161377		144.2	148.12	-2.6465		144.2	148.1		148.1	0.0135044
2014	10		59.5	120.939	152.9		-20.9031	90	213.3	147.2	92		133.536	152.9	-12.6646	-2.54047	137.6	152.9	-10.0065	0.260002	126.192	152.9	-17.4676		121.15	152.9	-20.7652	-8.91454	135.568	152.9	-11.3356		117.8	153.91	-23.4618		117.8	152.9		152.9	0.660562
2014	11		65.7	126.872	151.4		-16.2006	103.6	248.1	165	101.8		144.881	151.4	-4.30608	-2.5711	146.5	151.4	-3.23646	0.0215458	132.817	151.4	-12.2742		129.786	151.4	-14.2761	-9.37441	145.69	151.4	-3.77127		126.7	152.3	-16.8089		126.7	151.4		151.4	0.594452
2014	12		75.7	136.442	153.8		-11.2862	112.9	240.8	162.1	120		142.501	153.8	-7.34668	-3.03065	145.05	153.8	-5.68921	-0.854498	145.12	153.8	-5.64369		135.692	153.8	-11.7741	-10.3031	143.775	153.8	-6.51795		132.9	154.07	-13.7405		132.9	153.8		153.8	0.175553
2015	1	2015	65.9	127.064	137.3	5	-7.45545	93	204.5	140.6	101.2	5	130.667	137.3	-4.83103	-3.24835	134.3	137.3	-2.185	-1.43151	132.411	137.3	-3.56067	5	123.055	137.3	-10.3751	-10.8492	132.483	137.3	-3.50801	5	119.7	137.48	-12.9328		119.7	137.3		137.3	0.1311
2015	2		42.4	104.575	126		-17.0039	66.7	172.1	116.3	70.6		120.105	126	-4.67889	-3.16922	122.15	126	-3.05556	-1.46597	111.726	126	-11.3289		106.355	126	-15.5917	-10.871	121.127	126	-3.86722		102.5	125.77	-18.502		102.5	126		126	-0.18254
2015	3		37.4	99.7903	124.6		-19.9115	54.5	167.4	113.9	61.7		118.572	124.6	-4.83756	-2.71273	120.95	124.6	-2.92937	-1.27024	105.709	124.6	-15.1612		98.6075	124.6	-20.8608	-10.6221	119.761	124.6	-3.88347		94.8	125.58	-24.5103		94.8	124.6		124.6	0.786517
2015	4		49.1	110.987	129.7		-14.4281	75.3	211.7	141.6	72.5		133.014	129.7	2.55528	-1.48008	134.8	129.7	3.93215	-0.384946	113.01	129.7	-12.8682		111.816	129.7	-13.7891	-9.21458	133.907	129.7	3.24372		108.1	129.93	-16.8014		108.1	129.7		129.7	0.177332
2015	5		56.3	117.877	122.6		-3.85249	88.8	197.2	135.2	83		128.287	122.6	4.63883	-0.297732	131.6	122.6	7.34095	0.529715	120.108	122.6	-2.03263		120.388	122.6	-1.80424	-7.84336	129.944	122.6	5.98989		117	122.65	-4.6066		117	122.6		122.6	0.040783
2015	6		50.2	112.039	126.1		-11.1504	66.5	163.5	103.9	77.3		117.301	126.1	-6.9778	0.35304	115.95	126.1	-8.04917	0.793062	116.255	126.1	-7.80745		106.227	126.1	-15.7593	-7.22048	116.626	126.1	-7.51348		102.4	132.6	-22.7753		102.4	126.1		126.1	5.15464
2015	7		48	109.934	110.8		-0.781516	65.8	148.1	99.9	68.4		112.281	110.8	1.33628	1.24677	113.95	110.8	2.84296	1.00364	110.238	110.8	-0.506859		105.783	110.8	-4.52798	-6.62356	113.115	110.8	2.08962		102	110.5	-7.69231		102	110.8		110.8	-0.270758
2015	8		39.5	101.8	108		-5.74081	64.4	134.8	87.8	61.6		107.945	108	-0.0511111	3.00157	107.9	108	-0.0925926	1.95422	105.642	108	-2.1837		104.894	108	-2.87593	-5.58658	107.922	108	-0.0718519		101.1	108.59	-6.8975		101.1	108		108	0.546296
2015	9		49.3	111.178	102.7		8.25524	78.6	153.5	97.9	72.5		114.041	102.7	11.0428	4.55318	112.95	102.7	9.98053	2.9481	113.01	102.7	10.0389		113.911	102.7	10.9163	-3.76008	113.495	102.7	10.5117		110.3	103.04	7.04581		110.3	102.7		102.7	0.331061
2015	10		39.3	101.609	103.3		-1.63744	63.6	133.4	84.9	59.5		107.488	103.3	4.0546	4.81433	106.45	103.3	3.04937	3.09006	104.222	103.3	0.892546		104.386	103.3	1.05131	-2.22276	106.969	103.3	3.55198		100.5	103.3	-2.71055		100.5	103.3		103.3	0
2015	11		39.7	101.991	106.9		-4.59185	62.2	155.7	97.9	61.8		114.758	106.9	7.35098	4.25106	112.95	106.9	5.65949	2.66112	105.777	106.9	-1.0507		103.497	106.9	-3.18335	-1.77473	113.854	106.9	6.50524		99.6	107.32	-7.19344		99.6	106.9		106.9	0.392891
2015	12		36.3	98.7376	109.5		-9.82863	58	128.2	72.9	54.1		105.793	109.5	-3.38521	3.87984	100.45	109.5	-8.26484	2.53287	100.572	109.5	-8.15379		100.83	109.5	-7.91781	-1.35055	103.122	109.5	-5.82502		97	109.02	-11.0255		97	109.5		109.5	-0.438356
2016	1	2016	33.7	96.2496	100.1	5	-3.8466	57	149.6	83.1	50.4	5	112.77	100.1	12.6569	3.59174	105.55	100.1	5.44456	2.45836	98.0704	100.1	-2.02757	5	100.195	100.1	0.0949051	-1.07696	109.16	100.1	9.05075	5	96.4	100.33	-3.91707		96.4	100.1		100.1	0.22977
2016	2		38.4	100.747	101		-0.250234	56.4	175.3	98.5	56		121.148	101	19.9483	3.49722	113.25	101	12.1287	2.63395	101.856	101	0.847525		99.814	101	-1.17426	-0.551353	117.199	101	16.0385		96	101.17	-5.11021		96	101		101	0.168317
2016	3		30.5	93.1873	90.6		2.85572	54.1	103.2	63.6	40.9		97.6432	90.6	7.77395	3.1099	95.8	90.6	5.73951	2.65534	91.6484	90.6	1.15717		98.3535	90.6	8.55795	-0.296399	96.7216	90.6	6.75673		94.5	90.5	4.41989		116.88	125.172		90.6	-0.110375
2016	4		26.6	89.4551	94		-4.83496	37.9	81.1	57.5	39.2		90.4386	94	-3.78872	2.26323	92.75	94	-1.32979	2.22542	90.4992	94	-3.72426		88.0665	94	-6.31223	-0.643984	91.5943	94	-2.55926		84.8	94.12	-9.90225			-6.62417		94	0.12766
2016	5		33.7	96.2496	95.3		0.996382	51.5	88.6	67	48.9		92.8836	95.3	-2.53557	1.71301	97.5	95.3	2.3085	2.10013	97.0564	95.3	1.84302		96.7025	95.3	1.47167	-0.536849	95.1918	95.3	-0.113536		92.9	95.47	-2.69195			% diff		95.3	0.178384
2016	6		13.1	76.5362	84.5		-9.42464	20.5	40.3	30.7	19.3		77.1378	84.5	-8.71266	1.7577	79.35	84.5	-6.09467	2.68221	77.0468	84.5	-8.82036		77.0175	84.5	-8.85503	0.131729	78.2439	84.5	-7.40367		75.4	84.55	-10.822			AL55/		84.5	0.0591716
2016	7		21.3	84.3832	88.9		-5.08071	32.4	65.9	48.2	36.8		85.4834	88.9	-3.84319	1.73499	88.1	88.9	-0.899888	3.41847	88.8768	88.9	-0.0260967		84.574	88.9	-4.86614	0.941997	86.7917	88.9	-2.37154		81.7	89.12	-8.32585			AM55		88.9	0.247469
2016	8		33	95.5797	87.1		9.73557	50.2	78.5	59.9	50.4		89.591	87.1	2.85993	0.685053	93.95	87.1	7.86452	3.25619	98.0704	87.1	12.5952		95.877	87.1	10.0769	1.62281	91.7705	87.1	5.36223		92.1	87.25	5.55874			above		87.1	0.172216
2016	9		27.7	90.5078	88.7		2.0381	44.6	72.6	53.9	37.4		87.6676	88.7	-1.16392	-0.384749	90.95	88.7	2.53664	2.76533	89.2824	88.7	0.656595		92.321	88.7	4.0823	1.7109	89.3088	88.7	0.686359		88.7	88.39	0.350718			flux 100		88.7	-0.349493
2016	10		22.8	85.8187	85.6		0.255477	33.4	55.6	43.5	30		82.1256	85.6	-4.05888	-0.479815	85.75	85.6	0.175234	2.64853	84.28	85.6	-1.54206		85.209	85.6	-0.456776	1.8842	83.9378	85.6	-1.94182		82.2	85.61	-3.98318					85.6	0.0116822
2016	11		14	77.3974	76.9		0.646866	21.4	44.9	34.3	22.4		78.6374	76.9	2.2593	-0.123844	81.15	76.9	5.52666	2.65981	79.1424	76.9	2.91599		77.589	76.9	0.895969	2.32164	79.8937	76.9	3.89298		75.9	76.85	-1.23617					76.9	-0.0650195
2016	12		11	74.5266	72.8		2.37165	18.5	33.2	26.1	17.6		74.8232	72.8	2.77912	0.450969	77.05	72.8	5.83791	2.91594	75.8976	72.8	4.25495		75.7475	72.8	4.04876	2.62462	75.9366	72.8	4.30852		74.4	72.94	2.00165					72.8	0.192308
2017	1	2017	18.4	81.6081	74.9	5	8.95603	26.1	47.1	35.3	28.1	5	79.3546	74.9	5.9474	0.834165	81.65	74.9	9.01202	2.98764	82.9956	74.9	10.8085	5	80.5735	74.9	7.57477	2.90753	80.5023	74.9	7.47971	5	78.3	74.91	4.52543					74.9	0.0133511
2017	2		14.4	77.7802	75		3.70697	26.4	37.1	29	22		76.0946	75	1.45947	0.828759	78.5	75	4.66667	2.5542	78.872	75	5.16267		80.764	75	7.68533	2.70659	77.2973	75	3.06307		78.4	75.11	4.38024					75	0.146667
2017	3		11.3	74.8136	73.9		1.23633	17.7	31.7	21.9	25.4		74.3342	73.9	0.587551	0.922019	74.95	73.9	1.42084	2.28295	81.1704	73.9	9.83816		75.2395	73.9	1.81258	2.34767	74.6421	73.9	1.00419		74.1	73.95	0.20284					73.9	0.067659
2017	4		21.5	84.5746	80.8		4.67158	32.3	54.3	33.9	30.4		81.7018	80.8	1.11609	1.02253	80.95	80.8	0.185644	2.05826	84.5504	80.8	4.64158		84.5105	80.8	4.5922	1.9944	81.3259	80.8	0.650866		81.6	81.46	0.171863					80.8	0.816832
2017	5		12.5	75.962	75.2		1.0133	18.9	36.9	24	18.1		76.0294	75.2	1.10293	0.909738	76	75.2	1.06383	1.63902	76.2356	75.2	1.37713		76.0015	75.2	1.06582	1.62284	76.0147	75.2	1.08338		74.6	75.25	-0.863787					75.2	0.0664894
2017	6		15	78.3544	77.1		1.62698	19.2	43.6	28.2	18		78.2136	77.1	1.44436	0.636197	78.1	77.1	1.29702	1.14818	76.168	77.1	-1.20882		76.192	77.1	-1.17769	1.23531	78.1568	77.1	1.37069		74.8	77.19	-3.09626					77.1	0.116732
2017	7		11.5	75.005	79.9		-6.12636	17.8	37	21.3	18.8		76.062	79.9	-4.8035	0.37685	74.65	79.9	-6.57071	0.618179	76.7088	79.9	-3.99399		75.303	79.9	-5.75344	0.783443	75.356	79.9	-5.68711		74.1	80.11	-7.50218					79.9	0.262829
2017	8		22.8	85.8187	79.8		7.54222	32.6	57.5	36.6	25		82.745	79.8	3.69048	0.275841	82.3	79.8	3.13283	0.16045	80.9	79.8	1.37845		84.701	79.8	6.1416	0.220927	82.5225	79.8	3.41165		81.8	80.18	2.02045					79.8	0.47619
2017	9		34.6	97.1108	92.3		5.21215	43.7	87.5	58	42.2		92.525	92.3	0.24377	0.267843	93	92.3	0.758397	-0.107236	92.5272	92.3	0.246154		91.7495	92.3	-0.596425	-0.263578	92.7625	92.3	0.501083		88.2	96.55	-8.64837					92.3	4.60455
2017	10		10.5	74.0481	75.6		-2.0528	13.2	28.5	18	16		73.291	75.6	-3.05423	0.213609	73	75.6	-3.43915	-0.285919	74.816	75.6	-1.03704		72.382	75.6	-4.25661	-0.704637	73.1455	75.6	-3.24669		72	75.9	-5.13834					75.6	0.396825
2017	11		4.2	68.0192	70.6		-3.65548	5.7	17.1	11.9	7.7		69.5746	70.6	-1.45241	0.131469	69.95	70.6	-0.92068	-0.434335	69.2052	70.6	-1.97564		67.6195	70.6	-4.22167	-0.995226	69.7623	70.6	-1.18654		68.9	70.7	-2.54597					70.6	0.141643
2017	12		4	67.8278	69.3		-2.12433	8.2	16.1	11.3	7.6		69.2486	69.3	-0.0741703	-0.106296	69.65	69.3	0.505051	-0.704158	69.1376	69.3	-0.234343		69.207	69.3	-0.134199	-1.03954	69.4493	69.3	0.21544		69.9	69.46	0.633458					69.3	0.23088
2018	1	2018	3.1	66.9666	67.7	5	-1.08334	6.8	16.7	9.6	7.8	5	69.4442	67.7	2.57637	-0.362776	68.8	67.7	1.62482	-0.990189	69.2728	67.7	2.32319	5	68.318	67.7	0.912851	-1.21481	69.1221	67.7	2.10059		69.4	67.78	2.39009					67.7	0.118168
2018	2		6.8	70.5073	70.2		0.437789	10.7	24.2	13.9	16		71.8892	70.2	2.40627	-0.558024	70.95	70.2	1.06838	-1.2715	74.816	70.2	6.5755		70.7945	70.2	0.846866	-1.72583	71.4196	70.2	1.73732		70.9	69.96	1.34362					70.2	-0.34188
2018	3		1.1	65.0527	67.6		-3.76826	2.5	9.9	5.3	6		67.2274	67.6	-0.551183	-0.770497	66.65	67.6	-1.40533	-1.61357	68.056	67.6	0.674556		65.5875	67.6	-2.97707	-2.20734	66.9387	67.6	-0.978254		67.8	67.58	0.32554					67.6	-0.0295858
2018	4		4.7	68.4977	70.5		-2.84012	8.9	22	11.2	7		71.172	70.5	0.953191	-0.818302	69.6	70.5	-1.2766	-1.68598	68.732	70.5	-2.5078		69.6515	70.5	-1.20355	-2.30042	70.386	70.5	-0.161702		70.2	70.45	-0.354862					70.5	-0.070922
2018	5		8.4	72.0385	72.4		-0.499359	13.1	24.2	15.3	15		71.8892	72.4	-0.705525	-0.638462	71.65	72.4	-1.03591	-1.52775	74.14	72.4	2.40331		72.3185	72.4	-0.112569	-2.0849	71.7696	72.4	-0.870718		72	72.3	-0.414938					72.4	-0.138122
2018	6		10.2	73.761	74.7		-1.25704	15.6	27.2	16.8	19.7		72.8672	74.7	-2.45355	-0.504122	72.4	74.7	-3.07898	-1.43652	77.3172	74.7	3.50361		73.906	74.7	-1.06292	-2.0338	72.6336	74.7	-2.76627		73.1	74.7	-2.1419					74.7	0
2018	7		0.5	64.4785	72.3		-10.8181	1.6	9.8	3.5	1.3		67.1948	72.3	-7.06113	-0.635704	65.75	72.3	-9.05947	-1.50025	64.8788	72.3	-10.2645		65.016	72.3	-10.0747	-2.19749	66.4724	72.3	-8.0603		67.5	72.3	-6.639					72.3	0
2018	8		5.9	69.6461	70.8		-1.62985	8.7	23.6	12	10		71.6936	70.8	1.26215	-1.03203	70	70.8	-1.12994	-1.8331	70.76	70.8	-0.0564972		69.5245	70.8	-1.80155	-2.55511	70.8468	70.8	0.0661017		70.1	70.78	-0.960723					70.8	-0.0282486
2018	9		1.6	65.5311	69		-5.02734	3.3	10.2	5.6	5.7		67.3252	69	-2.42725	-1.29532	66.8	69	-3.18841	-2.06865	67.8532	69	-1.66203		66.0955	69	-4.20942	-2.78086	67.0626	69	-2.80783		68.1	69	-1.30435					69	0
2018	10		2.5	66.3924	69.1		-3.91838	4.9	12.4	8.5	6.9		68.0424	69.1	-1.53054	-1.54536	68.25	69.1	-1.2301	-2.20126	68.6644	69.1	-0.630391		67.1115	69.1	-2.87771	-2.83399	68.1462	69.1	-1.38032		68.7	69.12	-0.607639					69.1	0.0289436
2018	11		3.1	66.9666	67.4		-0.643062	4.9	13.2	7.7	7.3		68.3032	67.4	1.34006	-1.91355	67.85	67.4	0.667656	-2.41943	68.9348	67.4	2.27715		67.1115	67.4	-0.428042	-3.10142	68.0766	67.4	1.00386		69	67.4	2.37389					67.4	0
2018	12		1.6	65.5311	67.8		-3.34641	3.1	12.4	9.1	5.6		68.0424	67.8	0.357522	-2.01218	68.55	67.8	1.10619	-2.56079	67.7856	67.8	-0.0212389		65.9685	67.8	-2.70133	-3.52454	68.2962	67.8	0.731858		68	67.8	0.294985
2019	1	2019	5.4	69.1676	69.2	5	-0.0468439	7.7	13.8	9.7	8.3	5	68.4988	69.2	-1.01329	-1.75753	68.85	69.2	-0.50578	-2.44005	69.6108	69.2	0.593642	5	68.8895	69.2	-0.448699	-3.67301	68.6744	69.2	-0.759538		69.8	69.2	0.867052
2019	2				68.9			0.8	7.6	3.2	1.5		66.4776	68.9	-3.51582	-1.72829	65.6	68.9	-4.78955	-2.45959	65.014	68.9	-5.64006		64.508	68.9	-6.37446	-3.72826	66.0388	68.9	-4.15269		67.3	68.9	-2.32221
2019	3				70.8			9.4	18.8	11.9	14.8		70.1288	70.8	-0.948023	-1.97107	69.95	70.8	-1.20056	-2.69511	74.0048	70.8	4.52655		69.969	70.8	-1.17373	-3.9863	70.0394	70.8	-1.07429
2019	4				72.9			9.1	16.9	11	11.5		69.5094	72.9	-4.65103	-2.03781	69.5	72.9	-4.66392	-2.80536	71.774	72.9	-1.54458		69.7785	72.9	-4.28189	-4.10446	69.5047	72.9	-4.65748
2019	5				72.8			9.9	18.2	13.4	18.1		69.9332	72.8	-3.93791	-2.1251	70.7	72.8	-2.88462	-3.00047	76.2356	72.8	4.71923		70.2865	72.8	-3.45261	-4.40329	70.3166	72.8	-3.41126
2019	6				70.3			1.2	15.9	6.1	11.6		69.1834	70.3	-1.58834	-2.23793	67.05	70.3	-4.62304	-3.27469	71.8416	70.3	2.19289		64.762	70.3	-7.87767	-4.76025	68.1167	70.3	-3.10569
2019	7				69.3			0.9	12.4	4.2	1.6		68.0424	69.3	-1.81472	-2.1471	66.1	69.3	-4.6176	-3.41803	65.0816	69.3	-6.08716		64.5715	69.3	-6.82323	-4.96755	67.0712	69.3	-3.21616
2019	8				68.7			0.5	7.5	1.1			66.445	68.7	-3.28239	-2.0406	64.55	68.7	-6.04076	-3.42581		68.7			64.3175	68.7	-6.37918	-5.11129	65.4975	68.7	-4.66157
2019	9				68.7			1.1	6.6	4			66.1516	68.7	-3.70946	-2.16446	66	68.7	-3.93013	-3.6415		68.7			64.6985	68.7	-5.8246	-5.38044	66.0758	68.7	-3.8198
2019	10				67			0.4	5.4	1.8			65.7604	67	-1.85015	-2.08306	64.9	67	-3.13433	-3.7709		67			64.254	67	-4.09851	-5.58635	65.3302	67	-2.49224
2019	11				68.7			0.5	13.5	6.5			68.401	68.7	-0.435226	-1.9225	67.25	68.7	-2.11063	-3.87947		68.7			64.3175	68.7	-6.37918	-5.8067	67.8255	68.7	-1.27293
2019	12				68.6			1.5	12.9	5.5			68.2054	68.6	-0.575219	-1.97859	66.75	68.6	-2.69679	-4.01279		68.6			64.9525	68.6	-5.31706	-5.95007	67.4777	68.6	-1.63601
2020	1	2020			69.9	5		6.2	22.6	11.6		5	71.3676	69.9	2.09957	-2.0024	69.8	69.9	-0.143062	-3.93554		69.9		5	67.937	69.9	-2.8083	-5.79883	70.5838	69.9	0.978255
2020	2				69.3			0.2	7.6	3.2			66.4776	69.3	-4.07273	-1.89989	65.6	69.3	-5.33911	-3.84675		69.3			64.127	69.3	-7.46465	-5.73984	66.0388	69.3	-4.70592
2020	3				69.5			1.5	9.7	2.9			67.1622	69.5	-3.36374	-1.75633	65.45	69.5	-5.82734	-3.91001		69.5			64.9525	69.5	-6.54317	-5.90421	66.3061	69.5	-4.59554
2020	4				70			5.2	17.8	7.6			69.8028	70	-0.281714	-1.49904	67.8	70	-3.14286	-3.82266		70			67.302	70	-3.85429	-5.95252	68.8014	70	-1.71229
2020	5				70.6			0.2	10.6	3.3			67.4556	70.6	-4.45382	-1.31435	65.65	70.6	-7.01133	-3.71385		70.6			64.127	70.6	-9.16856	-5.6672	66.5528	70.6	-5.73258
2020	6				71.7			5.8	18.3	10.1			69.9658	71.7	-2.41869	-1.2928	69.05	71.7	-3.69596	-3.89141		71.7			67.683	71.7	-5.60251	-5.55266	69.5079	71.7	-3.05732
2020	7				71.8			6.1	20.5	10.3			70.683	71.8	-1.55571	-1.22628	69.15	71.8	-3.69081	-3.99366		71.8			67.8735	71.8	-5.46866	-5.65744	69.9165	71.8	-2.62326
2020	8				73.4			7.5	26.4	11.7			72.6064	73.4	-1.0812	-0.909802	69.85	73.4	-4.83651	-3.76487		73.4			68.7625	73.4	-6.31812	-5.57912	71.2282	73.4	-2.95886
2020	9				71.4			0.6	17.3	5.3			69.6398	71.4	-2.46527	-0.120739	66.65	71.4	-6.65266	-3.03832		71.4			64.381	71.4	-9.83053	-5.19097	68.1449	71.4	-4.55896
2020	10				74.2			14.6	38.3	22.9			76.4858	74.2	3.08059	0.851176	75.45	74.2	1.68464	-1.95184		74.2			73.271	74.2	-1.25202	-4.60094	75.9679	74.2	2.38261
2020	11				88			34.5	71.1	40.4			87.1786	88	-0.933409	1.81342	84.2	88	-4.31818	-0.743524		88			85.9075	88	-2.37784	-3.86656	85.6893	88	-2.6258
2020	12				84.2			23.1	63.1	32.4			84.5706	84.2	0.440143	2.94762	80.2	84.2	-4.75059	0.543104		84.2			78.6685	84.2	-6.56948	-3.32959	82.3853	84.2	-2.15523
2021	1				73.6			10.4	35.5	18.4			75.573	73.6	2.68071	4.02149	73.2	73.6	-0.543478	1.75444		73.6			70.604	73.6	-4.07065	-2.85766	74.3865	73.6	1.06861
2021	2				72.4			8.3	32.3	17.6			74.5298	72.4	2.94171	4.71727	72.8	72.4	0.552486	2.59856		72.4			69.2705	72.4	-4.32251	-2.34831	73.6649	72.4	1.7471
2021	3				75.2			17.2	54.1	31			81.6366	75.2	8.55931	5.73685	79.5	75.2	5.71809	3.80642		75.2			74.922	75.2	-0.369681	-1.37023	80.5683	75.2	7.1387
2021	4				76.4			24.5	64.1	42.2			84.8966	76.4	11.1212	6.62305	85.1	76.4	11.3874	4.80923		76.4			79.5575	76.4	4.13285	-0.538789	84.9983	76.4	11.2543
2021	5				77.1			21.2	57.3	37.7			82.6798	77.1	7.23709	6.97175	82.85	77.1	7.45785	5.31045		77.1			77.462	77.1	0.46952	-0.329718	82.7649	77.1	7.34747
2021	6				81.8			25	87.5	56.4			92.525	81.8	13.1112	7.76378	92.2	81.8	12.7139	6.42627		81.8			79.875	81.8	-2.3533	0.421775	92.3625	81.8	12.9126
2021	7				83.6			34.3	82.4	54.2			90.8624	83.6	8.68708	8.48292	91.1	83.6	8.97129	7.35949		83.6			85.7805	83.6	2.60825	1.10257	90.9812	83.6	8.82919
2021	8				79.7			22	61.3	35.8			83.9838	79.7	5.37491	8.84914	81.9	79.7	2.76035	7.77835		79.7			77.97	79.7	-2.17064	1.2451	82.9419	79.7	4.06763
2021	9				88.2			51.3	116.3	74.4			101.914	88.2	15.5485	9.04467	101.2	88.2	14.7392	7.99649		88.2			96.5755	88.2	9.49603	1.22286	101.557	88.2	15.1439
2021	10				88.3			37.4	91.7	56.3			93.8942	88.3	6.33545	8.31184	92.15	88.3	4.36014	7.18833		88.3			87.749	88.3	-0.624009	0.545783	93.0221	88.3	5.34779
2021	11				84.4			34.8	73.4	49.3			87.9284	84.4	4.18057	7.2542	88.65	84.4	5.03555	5.89854		84.4			86.098	84.4	2.01185	-0.449242	88.2892	84.4	4.60806
2021	12				99.8			67.5	153.7	96.9			114.106	99.8	14.3349	6.50607	112.45	99.8	12.6754	4.99791		99.8			106.862	99.8	7.07665	-1.10542	113.278	99.8	13.5051
2022	1				100.5			55.3	130.6	81.9			106.576	100.5	6.04537	5.82342	104.95	100.5	4.42786	4.22283		100.5			99.1155	100.5	-1.37761	-1.73981	105.763	100.5	5.23662
2022	2				106.5			60.9	157.7	97			115.41	106.5	8.36638	5.59638	112.5	106.5	5.6338	3.98409		106.5			102.672	106.5	-3.59484	-2.20195	113.955	106.5	7.00009
2022	3				115.8			78.6	186.7	117.2			124.864	115.8	7.82746	4.89094	122.6	115.8	5.87219	3.3359		115.8			113.911	115.8	-1.63126	-3.06329	123.732	115.8	6.84983
2022	4				131.7			84.1	184.5	113.9			124.147	131.7	-5.735	3.76525	120.95	131.7	-8.16249	2.2852		131.7			117.403	131.7	-10.8554	-4.03821	122.549	131.7	-6.94875
2022	5				136.8			96.5	217.9	134.8			135.035	136.8	-1.28991	3.25802	131.4	136.8	-3.94737	1.73376		136.8			125.278	136.8	-8.42288	-4.54175	133.218	136.8	-2.61864
2022	6				119.8			70.5	184.7	117.6			124.212	119.8	3.68297	2.6838	122.8	119.8	2.50417	1.06488		119.8			108.767	119.8	-9.2091	-5.33897	123.506	119.8	3.09357
2022	7				129.5			91.4	207.8	132.5			131.743	129.5	1.73189	1.90436	130.25	129.5	0.579151	0.307401		129.5			122.039	129.5	-5.76139	-6.29551	130.996	129.5	1.15552
2022	8				117.1			74.6	187.6	118.9			125.158	117.1	6.88096	1.11013	123.45	117.1	5.42272	-0.371553		117.1			111.371	117.1	-4.8924	-7.30984	124.304	117.1	6.15184				% diff
2022	9				136.5			96	210.3	135.5			132.558	136.5	-2.88806	0.147586	131.75	136.5	-3.47985	-1.10604		136.5			124.96	136.5	-8.45421	-8.17661	132.154	136.5	-3.18396				above
2022	10				132.7			95.5	201.6	130.4			129.722	132.7	-2.24446	0.112291	129.2	132.7	-2.63753	-1.00629		132.7			124.642	132.7	-6.07197	-8.59389	129.461	132.7	-2.44099				flux 100
2022	11				120.7			80.5	176.1	110.5			121.409	120.7	0.587075	0.676989	119.25	120.7	-1.20133	-0.264689		120.7			115.118	120.7	-4.6251	-8.57503	120.329	120.7	-0.307125				-6.8
2022	12				143.4			112.8	261.8	167			149.347	143.4	4.147	0.7563	147.5	143.4	2.85914	0.0311896		143.4			135.628	143.4	-5.4198	-8.06553	148.423	143.4	3.50307
2023	1				176.6			144.4	332	211.3			172.232	176.6	-2.47339	0.149386	169.65	176.6	-3.93545	-0.481473		176.6			155.694	176.6	-11.8381	-7.84343	170.941	176.6	-3.20442
2023	2				163.2			111.3	293.4	190.9			159.648	163.2	-2.17623	-1.18395	159.45	163.2	-2.29779	-1.76061		163.2			134.675	163.2	-17.4782	-8.32646	159.549	163.2	-2.23701
2023	3				155.6			123.3	258.4	171.3			148.238	155.6	-4.73111	-1.87197	149.65	155.6	-3.82391	-2.40953		155.6			142.296	155.6	-8.55045	-8.49885	148.944	155.6	-4.27751
2023	4				146.4			97.6	279.6	176.3			155.15	146.4	5.9765	-1.92125	152.15	146.4	3.9276	-2.3928		146.4			125.976	146.4	-13.9508	-8.49946	153.65	146.4	4.95205
2023	5				159			137.4	294.1	195.6			159.877	159	0.551321	-2.33751	161.8	159	1.76101	-2.60191		159			151.249	159	-4.87484	-8.98309	160.838	159	1.15616
2023	6				166.8			160.5	334.5	218.6			173.047	166.8	3.7452	-2.92556	173.3	166.8	3.89688	-2.81337		166.8			165.918	166.8	-0.529077	-9.36313	173.173	166.8	3.82104
2023	7				182.2			160	290.5	188.6			158.703	182.2	-12.8963	-3.04126	158.3	182.2	-13.1175	-2.55982		182.2			165.6	182.2	-9.11087	-9.33791	158.502	182.2	-13.0069
2023	8				157.6			114.8	236.4	150.7			141.066	157.6	-10.4909	-3.22054	139.35	157.6	-11.5799	-2.57142		157.6			136.898	157.6	-13.1358	-9.16484	140.208	157.6	-11.0354
2023	9				156			134.2	272.5	177.6			152.835	156	-2.02885	-3.72408	152.8	156	-2.05128	-3.04802		156			149.217	156	-4.34808	-9.35698	152.817	156	-2.04006
2023	10				141.9			99.9	220.3	145.4			135.818	141.9	-4.28626	-4.12239	136.7	141.9	-3.66455	-3.29086		141.9			127.436	141.9	-10.1927	-9.35309	136.259	141.9	-3.97541
2023	11				150.2			107.1	230.5	156.8			139.143	150.2	-7.36152	-4.70977	142.4	150.2	-5.19308	-3.76971		150.2			132.008	150.2	-12.1115	-9.28393	140.772	150.2	-6.2773
2023	12				146.4			113.5	243.7	170			143.446	146.4	-2.01762	-5.67873	149	146.4	1.77596	-4.84264		146.4			136.072	146.4	-7.0543	-9.94898	146.223	146.4	-0.120833
2024	1				159.3			126	296.8	200.9			160.757	159.3	0.914501	-5.74676	164.45	159.3	3.23289	-5.00363		159.3			144.01	159.3	-9.59824	-10.3197	162.603	159.3	2.0737
2024	2				168.3			123	269	175.8			151.694	168.3	-9.8669	-5.63131	151.9	168.3	-9.7445	-4.86236		168.3			142.105	168.3	-15.5645	-10.5332	151.797	168.3	-9.8057
2024	3				152.9			103.7	229.9	153.9			138.947	152.9	-9.12531	-6.32082	140.95	152.9	-7.81557	-5.47807		152.9			129.85	152.9	-15.0755	-11.5803	139.949	152.9	-8.47044
2024	4				162.6			136.5	306.5	204			163.919	162.6	0.811193	-6.90708	166	162.6	2.09102	-6.08313		162.6			150.678	162.6	-7.33241		164.959	162.6	1.45111
2024	5				191.9			171.7	343	225.5			175.818	191.9	-8.38041		176.75	191.9	-7.89474			191.9			173.029	191.9	-9.83351		176.284	191.9	-8.13757
2024	6				190.2			164.2	325.4	206			170.08	190.2	-10.5781		167	190.2	-12.1977			190.2			168.267	190.2	-11.5315		168.54	190.2	-11.3879
2024	7				203			196.5	425.1	274.4			202.583	203	-0.205616		201.2	203	-0.8867			203			188.778	203	-7.00616		201.891	203	-0.546158
2024	8				252.2			215.5	419.4	273.4			200.724	252.2	-20.4106		200.7	252.2	-20.4203			252.2			200.843	252.2	-20.3638		200.712	252.2	-20.4155
2024	9				197.8			141.4	357.9	236			180.675	197.8	-8.65753		182	197.8	-7.98787			197.8			153.789	197.8	-22.2503		181.338	197.8	-8.3227
2024	10				219.6			144.4	398.3	257.4			193.846	219.6	-11.7278		192.7	219.6	-12.2495			219.6			155.694	219.6	-29.1011		193.273	219.6	-11.9887
2024	11
2024	12
2025	1
2025	2
2025	3
2025	4
2025	5																														% diff
2025	6																														above
2025	7																														flux 100
2025	8																														-0.4
2025	9						% diff
2025	10						above
2025	11						flux 100
2025	12						-5.2								% diff				% diff				% diff				% diff
															above				above				above				above
															flux 100				flux 100				flux 100				flux 100
															-0.4				-0.4				-0.2				-3.5

## Sheet: SUNSPOTS
			WOLF	FITTED	ADJUSTED	%E/D		ISN	FITTED	%J/I		2K	FITTED	%N/M		1K	FITTED	%R/Q		(2K+1K)/2	FITTED	%V/U		NOAA	FITTED	%Z/Y			ADJUSTED	%F/AD		sunspots	Fitted		OBSERVED	OBSERVED	%AJ/AK
			SUNSPOT	WOLF	FLUX	Difference		MEAN	ISN	Difference			2K	Difference			1K	Difference			2K+1K	Difference		from	NOAA	Difference			FLUX	Difference		above	from		FLUX	FLUX	Difference
			NUMBER	NUMBER	STAR	Fitted/		SUNSPOT	FROM	Fitted/			FROM	Fitted/			FROM	Fitted/			FROM	Fitted/		NOAA	FROM	Fitted/			SOLEN	SOLEN/		FLUX	flux			SOLEN	SOLEN/
				from flux		WOLF		NUMBER	FLUX	ISN			FLUX	2K			FLUX	1K			FLUX	2K+1K			FLUX	NOAA				Adjusted		100					Observed
2012	1	2012	55.8	66.9845	128.1	20.0439	5	94.4	100.957	6.9465	5	152	196.627	29.3597	5	100.2	128.2	27.9441	5	126.1	162.413	28.7973	5	91.3	94.8231	3.85885	5					126.1	162.413		134.79	132.5	1.7283
2012	2		29.2	41.8	104	43.1507		47.8	63	31.7992		95.2	122.7	28.8866		61.8	80	29.4498		78.5	101.35	29.1083		50.1	59.172	18.1078						78.5	101.35		106.86	106.5	0.338028
2012	3		53.1	51.7275	113.5	-2.58475		86.6	77.9625	-9.97402		146.3	151.841	3.78759		96.6	99	2.48447		121.45	125.421	3.26935		77.9	73.2254	-6.00083						121.45	125.421		115.71	114.7	0.880558
2012	4		51.4	52.1455	113.9	1.45039		85.9	78.5925	-8.50698		162.4	153.068	-5.74615		104.6	99.8	-4.58891		133.5	126.434	-5.29279		84.4	73.8171	-12.539						133.5	126.434		113.26	113	0.230088
2012	5		61.8	62.7	124	1.45631		96.5	94.5	-2.07254		204.7	184.05	-10.0879		136.3	120	-11.9589		170.5	152.025	-10.8358		99.5	88.758	-10.796						170.5	152.025		121.4	121.5	-0.0823045
2012	6		59.7	62.073	123.4	3.97487		92	93.555	1.69022		180.3	182.21	1.05907		120.6	118.8	-1.49254		150.45	150.505	0.0363908		88.6	87.8704	-0.823454						150.45	150.505		120.4	119.6	0.668896
2012	7		64.2	77.8525	138.5	21.2656		100.1	117.337	17.2203		197.3	228.529	15.8281	7.42919	126.9	149	17.4153	7.46212	162.1	188.764	16.4493		99.6	110.208	10.6505						162.1	188.764		137.81	133.9	2.92009
2012	8		57.7	56.7435	118.3	-1.65771		94.8	85.5225	-9.78639		151.2	166.565	10.1622	4.86766	106.6	108.6	1.87617	4.99456	128.9	137.583	6.73594		85.8	80.326	-6.37997						128.9	137.583		115.86	115.4	0.398614
2012	9		57.7	63.0135	124.3	9.20884		93.7	94.9725	1.35806		175.7	184.97	5.27618	2.82013	114.1	120.6	5.69676	3.63208	144.9	152.785	5.44177		84	89.2018	6.19261						144.9	152.785		123.4	122.9	0.406835
2012	10		48.3	61.028	122.4	26.352		76.5	91.98	20.2353		148.3	179.142	20.797	2.03945	92.4	116.8	26.4069	3.50437	120.35	147.971	22.9506		73.5	86.3911	17.5389						120.35	147.971		123.07	123.3	-0.186537
2012	11		56.7	56.7435	118.3	0.0767196		87.6	85.5225	-2.37158		167.5	166.565	-0.55806	2.13921	106.5	108.6	1.97183	4.05533	137	137.583	0.425274		89.2	80.326	-9.94844			118.3	0		137	137.583
2012	12		37.4	42.845	105	14.5588		56.8	64.575	13.6884		121.1	125.767	3.85425	2.09046	75.3	82	8.89774	5.03804	98.2	103.884	5.78793		60.4	60.6513	0.41606			105	0		98.2	103.884
2013	1		63.8	61.7595	123.1	-3.19828		96.1	93.0825	-3.13996		177	181.289	2.42331	0.642047	119.6	118.2	-1.17057	5.1205	148.3	149.745	0.974123		99.8	87.4266	-12.3982			123.1	0		148.3	149.745
2013	2		37.8	39.501	101.8	4.5		60.9	59.535	-2.24138		122.9	115.951	-5.65378	-1.27275	76.1	75.6	-0.65703	4.75537	99.5	95.7757	-3.74296		60	55.9175	-6.8041			101.8	0		99.5	95.7757
2013	3		50.6	48.279	110.2	-4.58696		78.3	72.765	-7.06897		158.9	141.719	-10.8128	-2.52822	92.5	92.4	-0.108108	5.10355	125.7	117.059	-6.87411		81	68.3437	-15.6251			110.2	0		125.7	117.059
2013	4		70.6	64.6855	125.9	-8.37748		107.3	97.4925	-9.14026		210.7	189.878	-9.88218	-3.98779	130.4	123.8	-5.06135	4.19758	170.55	156.839	-8.03921		112.8	91.5687	-18.8221			125.9	0		170.55	156.839
2013	5		77.4	73.4635	134.3	-5.08592		120.2	110.723	-7.88478		223.6	215.645	-3.55758	-4.74517	138.2	140.6	1.73661	3.27227	180.9	178.123	-1.53531		125.5	103.995	-17.1356			134.3	0		180.9	178.123
2013	6		51	51.9365	113.7	1.83627		76.7	78.2775	2.05671		163.3	152.455	-6.6413	-5.10649	91.7	99.4	8.39695	2.97668	127.5	125.927	-1.23343		80.1	73.5212	-8.21322			113.7	0		127.5	125.927
2013	7		57	57.7885	119.3	1.38333		86.2	87.0975	1.04118		191.1	169.633	-11.2335	-5.77072	101	110.6	9.50495	2.14456	146.05	140.116	-4.06274		86.1	81.8053	-4.98805			119.3	0		146.05	140.116
2013	8		60	56.7435	118.3	-5.4275		91.8	85.5225	-6.83824		182.5	166.565	-8.73137	-5.79292	107.5	108.6	1.02326	1.68012	145	137.583	-5.11543		90.2	80.326	-10.9468			118.3	0		145	137.583
2013	9		34.6	41.4865	103.7	19.9032		54.5	62.5275	14.7294		129.5	121.78	-5.96158	-5.74707	69.1	79.4	14.9059	0.65396	99.3	100.59	1.29897		55.1	58.7282	6.58477			103.7	0		99.3	100.59
2013	10		74.5	70.224	131.2	-5.7396		114.4	105.84	-7.48252		212.5	206.136	-2.99482	-5.43063	140.8	134.4	-4.54545	-0.220789	176.65	170.268	-3.61279		127.1	99.409	-21.7868			131.2	0		176.65	170.268
2013	11		73.9	84.7495	145.1	14.6813		113.9	127.732	12.1444		236.8	248.774	5.05669	-5.4378	146.5	162.2	10.7167	-1.20926	191.65	205.487	7.22		125.7	119.971	-4.55749			145.1	0		191.65	205.487
2013	12		77.8	82.6595	143.1	6.24614		124.2	124.582	0.307971		270.9	242.639	-10.4322	-5.65287	170	158.2	-6.94118	-3.01923	220.45	200.42	-9.08613		118.2	117.013	-1.00454			143.1	0		220.45	200.42
2014	1	2014	77.4	92.378	152.4	19.3514	5	117	139.23	19	5	269.1	271.167	0.768116	-4.87879	186.7	176.8	-5.30262	-4.39098	227.9	223.984	-1.71852	5	125.9	130.77	3.86824	5		152.4	0		227.9	223.984
2014	2		93.9	106.904	166.3	13.8482		146.1	161.123	10.2823		328.7	313.805	-4.53141	-3.99969	221.6	204.6	-7.67148	-5.10857	275.15	259.203	-5.79588		174.6	151.332	-13.3262			166.3	0		275.15	259.203
2014	3		80.9	88.3025	148.5	9.15019		128.7	133.088	3.40909		290.7	259.204	-10.8346	-3.39872	205.4	169	-17.7215	-6.16513	248.05	214.102	-13.686		141.1	125.001	-11.4097			148.5	0		248.05	214.102
2014	4		76.9	84.436	144.8	9.79974		112.5	127.26	13.12		253.6	247.854	-2.26577	-1.72707	176.5	161.6	-8.44193	-5.85793	215.05	204.727	-4.80028		130.5	119.527	-8.40809			144.8	0		215.05	204.727
2014	5		72.3	72.0005	132.9	-0.414246		112.5	108.518	-3.54		238.4	211.351	-11.3462	-0.316753	169.3	137.8	-18.606	-5.00143	203.85	174.575	-14.3609		116.8	101.924	-12.7365			132.9	0		203.85	174.575
2014	6		67.2	64.581	125.8	-3.89732		102.9	97.335	-5.40816		197.5	189.571	-4.01443	0.842865	144.9	123.6	-14.6998	-4.46144	171.2	156.586	-8.53636		107.7	91.4207	-15.1154			125.8	0		171.2	156.586
2014	7		72.5	81.301	141.8	12.1393		100.2	122.535	22.2904		227.9	238.652	4.71764	2.25988	156.1	155.6	-0.320307	-3.32365	192	197.126	2.66966		113.6	115.09	1.31121			141.8	0		192	197.126
2014	8		71.2	66.7755	127.9	-6.21419		106.9	100.643	-5.8536		203.3	196.013	-3.58424	3.26912	136.5	127.8	-6.37363	-2.32939	169.9	161.907	-4.70475		106.2	94.5273	-10.9913			127.9	0		169.9	161.907
2014	9		83.2	87.8845	148.1	5.63041		130	132.457	1.89038		249.7	257.977	3.31468	4.80746	173.5	168.2	-3.05476	-0.728429	211.6	213.088	0.703391		127.4	124.409	-2.34762			148.1	0		211.6	213.088
2014	10		59.5	92.9005	152.9	56.1353		90	140.018	55.575		213.3	272.701	27.8485	5.61347	147.2	177.8	20.788	0.32862	180.25	225.25	24.9655		92	131.51	42.9454			152.9	0		180.25	225.25
2014	11		65.7	91.333	151.4	39.0152		103.6	137.655	32.8716		248.1	268.1	8.06106	5.61198	165	174.8	5.93939	0.600743	206.55	221.45	7.21363		101.8	129.291	27.0047			151.4	0		206.55	221.45
2014	12		75.7	93.841	153.8	23.9643		112.9	141.435	25.2746		240.8	275.462	14.3943	6.57128	162.1	179.6	10.7958	2.24784	201.45	227.531	12.9465		120	132.841	10.701			153.8	0		201.45	227.531
2015	1		65.9	76.5985	137.3	16.2344		93	115.448	24.1371		204.5	224.848	9.95	7.10209	140.6	146.6	4.26743	3.42499	172.55	185.724	7.63482		101.2	108.433	7.14693			137.3	0		172.55	185.724
2015	2		42.4	64.79	126	52.8066		66.7	97.65	46.4018		172.1	190.185	10.5084	6.93236	116.3	124	6.62081	3.45064	144.2	157.093	8.94071		70.6	91.7166	29.9102			126	0		144.2	157.093
2015	3		37.4	63.327	124.6	69.3235		54.5	95.445	75.1284		167.4	185.89	11.0457	6.00455	113.9	121.2	6.40913	2.98049	140.65	153.545	9.16833		61.7	89.6456	45.2927			124.6	0		140.65	153.545
2015	4		49.1	68.6565	129.7	39.8299		75.3	103.477	37.4203		211.7	201.535	-4.80172	3.36052	141.6	131.4	-7.20339	1.05993	176.65	166.467	-5.76429		72.5	97.19	34.0552			129.7	0		176.65	166.467
2015	5		56.3	61.237	122.6	8.76909		88.8	92.295	3.93581		197.2	179.755	-8.8461	0.817962	135.2	117.2	-13.3136	-0.877886	166.2	148.478	-10.6632		83	86.687	4.44214			122.6	0		166.2	148.478
2015	6		50.2	64.8945	126.1	29.2719		66.5	97.8075	47.0789		163.5	190.492	16.5087	-0.393149	103.9	124.2	19.538	-1.05565	133.7	157.346	17.6858		77.3	91.8645	18.8416			126.1	0		133.7	157.346
2015	7		48	48.906	110.8	1.8875		65.8	73.71	12.0213		148.1	143.559	-3.06617	-2.12034	99.9	93.6	-6.30631	-1.19529	124	118.579	-4.37137		68.4	69.2312	1.21526			110.8	0		124	118.579
2015	8		39.5	45.98	108	16.4051		64.4	69.3	7.6087		134.8	134.97	0.126113	-5.52416	87.8	88	0.22779	-3.23187	111.3	111.485	0.166217		61.6	65.0892	5.66429			108	0		111.3	111.485
2015	9		49.3	40.4415	102.7	-17.9686		78.6	60.9525	-22.4523		153.5	118.712	-22.663	-8.76349	97.9	77.4	-20.9397	-5.49251	125.7	98.0561	-21.9919		72.5	57.2489	-21.036			102.7	0		125.7	98.0561
2015	10		39.3	41.0685	103.3	4.5		63.6	61.8975	-2.67689		133.4	120.553	-9.63062	-9.33464	84.9	78.6	-7.42049	-5.9596	109.15	99.5764	-8.77107		59.5	58.1365	-2.29161			103.3	0		109.15	99.5764
2015	11		39.7	44.8305	106.9	12.9232		62.2	67.5675	8.62942		155.7	131.596	-15.4812	-7.85608	97.9	85.8	-12.3596	-5.19719	126.8	108.698	-14.2761		61.8	63.462	2.68927			106.9	0		126.8	108.698
2015	12		36.3	47.5475	109.5	30.9848		58	71.6625	23.556		128.2	139.571	8.86993	-5.49179	72.9	91	24.8285	-4.33224	100.55	115.286	14.655		54.1	67.3081	24.4143			109.5	0		100.55	115.286
2016	1	2016	33.7	37.7245	100.1	11.9421	5	57	56.8575	-0.25	5	149.6	110.737	-25.9781	-3.05427	83.1	72.2	-13.1167	-3.34731	116.35	91.4684	-21.3852	5	50.4	53.4027	5.9578	5		100.1	0		116.35	91.4684
2016	2		38.4	38.665	101	0.690104		56.4	58.275	3.32447		175.3	113.498	-35.2553	-2.67466	98.5	74	-24.8731	-3.9087	136.9	93.7488	-31.5203		56	54.7341	-2.26054			101	0		136.9	93.7488
2016	3		30.5	27.797	90.6	-8.8623		54.1	41.895	-22.5601		103.2	81.5955	-20.9346	-1.95941	63.6	53.2	-16.3522	-4.34655	83.4	67.3977	-19.1874		40.9	39.3494	-3.79125			90.6	0		155.823	154.995
2016	4		26.6	31.35	94	17.8571		37.9	47.25	24.6702		81.1	92.025	13.471	0.366649	57.5	60	4.34783	-3.54148	69.3	76.0125	9.68615		39.2	44.379	13.2117			94	0			-0.531658
2016	5		33.7	32.7085	95.3	-2.94214		51.5	49.2975	-4.2767		88.6	96.0127	8.36653	1.71714	67	62.6	-6.56716	-3.7786	77.8	79.3064	1.93621		48.9	46.3021	-5.3127			95.3	0			% diff
2016	6		13.1	21.4225	84.5	63.5305		20.5	32.2875	57.5		40.3	62.8837	56.0391	0.719195	30.7	41	33.5505	-6.68766	35.5	51.9419	46.3151		19.3	30.3256	57.1277			84.5	0			AG55/
2016	7		21.3	26.0205	88.9	22.162		32.4	39.2175	21.0417		65.9	76.3808	15.904	-0.555628	48.2	49.8	3.3195	-10.1261	57.05	63.0904	10.5879		36.8	36.8346	0.0939402			88.9	0			AH55
2016	8		33	24.1395	87.1	-26.85		50.2	36.3825	-27.5249		78.5	70.8592	-9.73344	0.409888	59.9	46.2	-22.8715	-11.1424	69.2	58.5296	-15.4196		50.4	34.1718	-32.1988			87.1	0			above
2016	9		27.7	25.8115	88.7	-6.81769		44.6	38.9025	-12.7747		72.6	75.7673	4.3626	2.19901	53.9	49.4	-8.34879	-10.83	63.25	62.5836	-1.05356		37.4	36.5387	-2.30291			88.7	0			flux 100
2016	10		22.8	22.572	85.6	-1		33.4	34.02	1.85629		55.6	66.258	19.1691	2.1227	43.5	43.2	-0.689655	-10.7662	49.55	54.729	10.4521		30	31.9529	6.5096			85.6	0
2016	11		14	13.4805	76.9	-3.71071		21.4	20.3175	-5.05841		44.9	39.5708	-11.8692	0.71329	34.3	25.8	-24.7813	-10.9884	39.6	32.6854	-17.4612		22.4	19.083	-14.8082			76.9	0
2016	12		11	9.196	72.8	-16.4		18.5	13.86	-25.0811		33.2	26.994	-18.6928	-2.58397	26.1	17.6	-32.567	-12.686	29.65	22.297	-24.7993		17.6	13.0178	-26.035			72.8	0
2017	1		18.4	11.3905	74.9	-38.0951		26.1	17.1675	-34.2241		47.1	33.4358	-29.0111	-4.58221	35.3	21.8	-38.2436	-12.4638	41.2	27.6179	-32.9663		28.1	16.1244	-42.6179			74.9	0
2017	2		14.4	11.495	75	-20.1736		26.4	17.325	-34.375		37.1	33.7425	-9.04987	-4.1681	29	22	-24.1379	-10.1643	33.05	27.8712	-15.6694		22	16.2723	-26.035			75	0
2017	3		11.3	10.3455	73.9	-8.4469		17.7	15.5925	-11.9068		31.7	30.3683	-4.2011	-4.63176	21.9	19.8	-9.58904	-9.53327	26.8	25.0841	-6.40252		25.4	14.6451	-42.3422			73.9	0
2017	4		21.5	17.556	80.8	-18.3442		32.3	26.46	-18.0805		54.3	51.534	-5.09392	-4.60957	33.9	33.6	-0.884956	-8.05353	44.1	42.567	-3.47619		30.4	24.8522	-18.2492			80.8	0
2017	5		12.5	11.704	75.2	-6.368		18.9	17.64	-6.66667		36.9	34.356	-6.89431	-3.11176	24	22.4	-6.66667	-5.33336	30.45	28.378	-6.8046		18.1	16.5682	-8.4632			75.2	0
2017	6		15	13.6895	77.1	-8.73667		19.2	20.6325	7.46094		43.6	40.1842	-7.83429	-1.03107	28.2	26.2	-7.0922	-2.74677	35.9	33.1921	-7.54283		18	19.3788	7.66017			77.1	0
2017	7		11.5	16.6155	79.9	44.4826		17.8	25.0425	40.6882		37	48.7733	31.8196	-0.337477	21.3	31.8	49.2958	-1.0093	29.15	40.2866	38.2045		18.8	23.5209	25.111			79.9	0
2017	8		22.8	16.511	79.8	-27.5833		32.6	24.885	-23.6656		57.5	48.4665	-15.7104	-0.978625	36.6	31.6	-13.6612	0.185431	47.05	40.0332	-14.9134		25	23.3729	-6.50824			79.8	0
2017	9		34.6	29.5735	92.3	-14.5275		43.7	44.5725	1.99657		87.5	86.8102	-0.788286	-0.837573	58	56.6	-2.41379	2.63479	72.75	71.7051	-1.43625		42.2	41.8642	-0.795758			92.3	0
2017	10		10.5	12.122	75.6	15.4476		13.2	18.27	38.4091		28.5	35.583	24.8526	-0.359607	18	23.2	28.8889	5.23456	23.25	29.3915	26.4151		16	17.1599	7.24925			75.6	0
2017	11		4.2	6.897	70.6	64.2143		5.7	10.395	82.3684		17.1	20.2455	18.3947	0.0193142	11.9	13.2	10.9244	6.62735	14.5	16.7227	15.3293		7.7	9.76338	26.7971			70.6	0
2017	12		4	5.5385	69.3	38.4625		8.2	8.3475	1.79878		16.1	16.2577	0.979814	1.76406	11.3	10.6	-6.19469	8.75001	13.7	13.4289	-1.97901		7.6	7.84029	3.16171			69.3	0
2018	1	2018	3.1	3.8665	67.7	24.7258	5	6.8	5.8275	-14.3015	5	16.7	11.3498	-32.0374	8.28419	9.6	7.4	-22.9167	23.7276	13.15	9.37488	-28.7082	5	7.8	5.47341	-29.8281	5		67.7	0
2018	2		6.8	6.479	70.2	-4.72059		10.7	9.765	-8.73832		24.2	19.0185	-21.4112	13.7873	13.9	12.4	-10.7914	38.3937	19.05	15.7093	-17.5367		16	9.17166	-42.6771			70.2	0
2018	3		1.1	3.762	67.6	242		2.5	5.67	126.8		9.9	11.043	11.5455	16.0895	5.3	7.2	35.8491	42.8928	7.6	9.1215	20.0197		6	5.32548	-11.242			67.6	0
2018	4		4.7	6.7925	70.5	44.5213		8.9	10.2375	15.0281		22	19.9387	-9.36932	18.2756	11.2	13	16.0714	45.8968	16.6	16.4694	-0.786898		7	9.61545	37.3636			70.5	0
2018	5		8.4	8.778	72.4	4.5		13.1	13.23	0.992366		24.2	25.767	6.47521	16.6892	15.3	16.8	9.80392	44.5843	19.75	21.2835	7.76456		15	12.4261	-17.1592			72.4	0
2018	6		10.2	11.1815	74.7	9.62255		15.6	16.8525	8.02885		27.2	32.8223	20.67	14.7576	16.8	21.4	27.381	43.2134	22	27.1111	23.2324		19.7	15.8285	-19.6522			74.7	0
2018	7		0.5	8.6735	72.3	1634.7		1.6	13.0725	717.031		9.8	25.4602	159.798	16.4513	3.5	16.6	374.286	44.0402	6.65	21.0301	216.242		1.3	12.2782	844.476			72.3	0
2018	8		5.9	7.106	70.8	20.4407		8.7	10.71	23.1034		23.6	20.859	-11.6144	23.4016	12	13.6	13.3333	54.3392	17.8	17.2295	-3.20506		10	10.0592	0.5924			70.8	0
2018	9		1.6	5.225	69	226.562		3.3	7.875	138.636		10.2	15.3375	50.3676	28.3429	5.6	10	78.5714	62.4841	7.9	12.6687	60.3639		5.7	7.3965	29.7632			69	0
2018	10		2.5	5.3295	69.1	113.18		4.9	8.0325	63.9286		12.4	15.6442	26.1633	31.2729	8.5	10.2	20	63.4917	10.45	12.9221	23.6567		6.9	7.54443	9.33957
2018	11		3.1	3.553	67.4	14.6129		4.9	5.355	9.28571		13.2	10.4295	-20.9886	35.971	7.7	6.8	-11.6883	66.2953	10.45	8.61475	-17.5622		7.3	5.02962	-31.1011
2018	12		1.6	3.971	67.8	148.187		3.1	5.985	93.0645		12.4	11.6565	-5.99597	37.7509	9.1	7.6	-16.4835	70.4918	10.75	9.62825	-10.4349		5.6	5.62134	0.381071
2019	1		5.4	5.434	69.2	0.62963		7.7	8.19	6.36364		13.8	15.951	15.587	32.4252	9.7	10.4	7.21649	64.5448	11.75	13.1755	12.1319		8.3	7.69236	-7.32096
2019	2				68.9			0.8	7.7175	864.688		7.6	15.0308	97.773	31.3901	3.2	9.8	206.25	86.1826	5.4	12.4154	129.914		1.5	7.24857	383.238
2019	3				70.8			9.4	10.71	13.9362		18.8	20.859	10.9521	38.5534	11.9	13.6	14.2857	119.418	15.35	17.2295	12.2443		14.8	10.0592	-32.0322
2019	4				72.9			9.1	14.0175	54.0385		16.9	27.3008	61.5429	43.2338	11	17.8	61.8182	130.658	13.95	22.5504	61.6514		11.5	13.1658	14.485
2019	5				72.8			9.9	13.86	40		18.2	26.994	48.3187	46.2353	13.4	17.6	31.3433	141.893	15.8	22.297	41.1203		18.1	13.0178	-28.0782
2019	6				70.3			1.2	9.9225	726.875		15.9	19.3252	21.5425	48.0338	6.1	12.6	106.557	147.728	11	15.9626	45.1148		11.6	9.31959	-19.6587
2019	7				69.3			0.9	8.3475	827.5		12.4	16.2577	31.1109	47.1952	4.2	10.6	152.381	150.989	8.3	13.4289	61.7937		1.6	7.84029	390.018
2019	8				68.7			0.5	7.4025	1380.5		7.5	14.4173	92.23	46.8836	1.1	9.4	754.545	150.269	4.3	11.9086	176.945			6.95271
2019	9				68.7			1.1	7.4025	572.955		6.6	14.4173	118.443	50.6756	4	9.4	135	160.819	5.3	11.9086	124.691
2019	10				67			0.4	4.725	1081.25		5.4	9.2025	70.4167	50.877	1.8	6	233.333	171.699	3.6	7.60125	111.146
2019	11				68.7			0.5	7.4025	1380.5		13.5	14.4173	6.79444	50.2325	6.5	9.4	44.6154	182.729	10	11.9086	19.0863
2019	12				68.6			1.5	7.245	383		12.9	14.1105	9.38372	52.3244	5.5	9.2	67.2727	191.67	9.2	11.6552	26.6875
2020	1	2020			69.9			6.2	9.2925	49.879		22.6	18.0983	-19.9192	52.0382	11.6	11.8	1.72414	185.211	17.1	14.9491	-12.5782
2020	2				69.3			0.2	8.3475	4073.75		7.2	16.2577	125.802	47.9796	3.6	10.6	194.444	152.095	5.4	13.4289	148.683
2020	3				69.5			1.5	8.6625	477.5		9.7	16.8712	73.9304	40.8863	2.9	11	279.31	125.028	6.3	13.9356	121.2
2020	4				70			5.2	9.45	81.7308		17.8	18.405	3.39888	33.5548	7.6	12	57.8947	116.694	12.7	15.2025	19.7047
2020	5				70.6			0.2	10.395	5097.5		10.6	20.2455	90.9953	29.7225	3.3	13.2	300	105.442	6.95	16.7227	140.615
2020	6				71.7			5.8	12.1275	109.095		18.3	23.6198	29.0697	29.1211	10.1	15.4	52.4752	102.593	14.2	19.5099	37.3935
2020	7				71.8			6.1	12.285	101.393		20.5	23.9265	16.7146	28.7747	10.3	15.6	51.4563	100.928	15.4	19.7632	28.3328
2020	8				73.4			7.5	14.805	97.4		26.4	28.8345	9.22159	22.8098	11.7	18.8	60.6838	92.7458	19.05	23.8173	25.0249
2020	9				71.4			0.6	11.655	1842.5		17.3	22.6995	31.211	12.1243	5.3	14.8	179.245	71.6607	11.3	18.7498	65.927
2020	10				74.2			14.6	16.065	10.0342		38.3	31.2885	-18.3068	5.6874	22.9	20.4	-10.917	54.7365	30.6	25.8443	-15.5417
2020	11				88			34.5	37.8	9.56522		71.1	73.62	3.5443	-1.18446	40.4	48	18.8119	36.8353	55.75	60.81	9.07623
2020	12				84.2			23.1	31.815	37.7273		63.1	61.9635	-1.80111	-8.99836	32.4	40.4	24.6914	19.3411	47.75	51.1818	7.18691
2021	1				73.6			10.4	15.12	45.3846		35.5	29.448	-17.0479	-13.5991	18.4	19.2	4.34783	12.3209	26.95	24.324	-9.74397
2021	2				72.4			8.3	13.23	59.3976		32.3	25.767	-20.226	-16.6994	17.6	16.8	-4.54545	5.98314	24.95	21.2835	-14.6954
2021	3				75.2			17.2	17.64	2.55814		54.1	34.356	-36.4954	-20.7844	31	22.4	-27.7419	-5.9821	42.55	28.378	-33.3067
2021	4				76.4			24.5	19.53	-20.2857		64.1	38.037	-40.6599	-23.6089	42.2	24.8	-41.2322	-15.0217	53.15	31.4185	-40.8871
2021	5				77.1			21.2	20.6325	-2.67689		57.3	40.1842	-29.8704	-24.3879	37.7	26.2	-30.504	-16.6389	47.5	33.1921	-30.1218
2021	6				81.8			25	28.035	12.14		87.5	54.6015	-37.5983	-26.2645	56.4	35.6	-36.8794	-20.2579	71.95	45.1007	-37.3165
2021	7				83.6			34.3	30.87	-10		82.4	60.123	-27.0352	-27.2633	54.2	39.2	-27.6753	-23.0085	68.3	49.6615	-27.2892
2021	8				79.7			22	24.7275	12.3977		61.3	48.1598	-21.436	-27.027	35.8	31.4	-12.2905	-23.9685	48.55	39.7799	-18.0641
2021	9				88.2			51.3	38.115	-25.7018		116.3	74.2335	-36.1707	-26.0062	74.4	48.4	-34.9462	-23.6222	95.35	61.3168	-35.693
2021	10				88.3			37.4	38.2725	2.33289		91.7	74.5402	-18.7129	-22.8887	56.3	48.6	-13.6767	-20.4453	74	61.5701	-16.7971
2021	11				84.4			34.8	32.13	-7.67241		73.4	62.577	-14.7452	-19.3231	49.3	40.8	-17.2414	-16.3359	61.35	51.6885	-15.7482
2021	12				99.8			67.5	56.385	-16.4667		153.7	109.816	-28.5514	-16.7137	96.9	71.6	-26.1094	-13.407	125.3	90.7082	-27.6071
2022	1				100.5			55.3	57.4875	3.9557		130.6	111.964	-14.2697	-14.4639	81.9	73	-10.8669	-10.977	106.25	92.4819	-12.9582
2022	2				106.5			60.9	66.9375	9.91379		157.7	130.369	-17.3312	-13.1311	97	85	-12.3711	-9.80398	127.35	107.684	-15.4422
2022	3				115.8			78.6	81.585	3.79771		186.7	158.896	-14.8921	-11.0402	117.2	103.6	-11.6041	-7.98871	151.95	131.248	-13.6241
2022	4				131.7			84.1	106.627	26.7866		184.5	207.67	12.5581	-8.32489	113.9	135.4	18.8762	-5.44695	149.2	171.535	14.9698
2022	5				136.8			96.5	114.66	18.8187		217.9	223.314	2.48463	-6.79336	134.8	145.6	8.01187	-3.82568	176.35	184.457	4.59711
2022	6				119.8			70.5	87.885	24.6596		184.7	171.166	-7.32729	-5.33105	117.6	111.6	-5.10204	-2.11463	151.15	141.383	-6.46163
2022	7				129.5			91.4	103.162	12.8693		207.8	200.921	-3.31027	-3.66896	132.5	131	-1.13208	-0.504449	170.15	165.961	-2.46217
2022	8				117.1			74.6	83.6325	12.1079		187.6	162.884	-13.1747	-2.02934	118.9	106.2	-10.6812	0.901598	153.25	134.542	-12.2074
2022	9				136.5			96	114.188	18.9453		210.3	222.394	5.75071	-0.167821	135.5	145	7.01107	2.35372	172.9	183.697	6.24458
2022	10				132.7			95.5	108.202	13.301		201.6	210.737	4.53237	-0.106372	130.4	137.4	5.3681	2.06838	166	174.069	4.86062
2022	11				120.7			80.5	89.3025	10.9348		176.1	173.927	-1.23382	-1.17118	110.5	113.4	2.62443	0.556958	143.3	143.664	0.253751
2022	12				143.4			112.8	125.055	10.8644		261.8	243.56	-6.96734	-1.24615	167	158.8	-4.91018	0.0686347	214.4	201.18	-6.16616
2023	1				176.6			144.4	177.345	22.8151		332	345.4	4.0363	-0.00776707	211.3	225.2	6.57832	1.13663	271.65	285.3	5.02494
2023	2				163.2			111.3	156.24	40.3774		293.4	304.296	3.7137	2.60687	190.9	198.4	3.92876	3.69406	242.15	251.348	3.79847
2023	3				155.6			123.3	144.27	17.0073		258.4	280.983	8.73955	3.9586	171.3	183.2	6.94688	5.00631	214.85	232.091	8.0249
2023	4				146.4			97.6	129.78	32.9713		279.6	252.762	-9.59871	4.0315	176.3	164.8	-6.52297	4.93869	227.95	208.781	-8.4093
2023	5				159			137.4	149.625	8.89738		294.1	291.412	-0.913805	4.86009	195.6	190	-2.86299	5.31824	244.85	240.706	-1.69236
2023	6				166.8			160.5	161.91	0.878505		334.5	315.339	-5.72825	5.96988	218.6	205.6	-5.94694	5.70057	276.55	260.47	-5.81468
2023	7				182.2			160	186.165	16.3531		290.5	362.578	24.8119	6.18423	188.6	236.4	25.3446	5.28999	239.55	299.489	25.0216
2023	8				157.6			114.8	147.42	28.4146		236.4	287.118	21.4543	6.58763	150.7	187.2	24.2203	5.41597	193.55	237.159	22.5311
2023	9				156			134.2	144.9	7.97317		272.5	282.21	3.5633	7.6335	177.6	184	3.6036	6.38728	225.05	233.105	3.5792
2023	10				141.9			99.9	122.693	22.8153		220.3	238.958	8.46947	8.39003	145.4	155.8	7.15268	6.87779	182.85	197.379	7.94593
2023	11				150.2			107.1	135.765	26.7647		230.5	264.418	14.7152	9.37235	156.8	172.4	9.94898	7.68985	193.65	218.409	12.7856
2023	12				146.4			113.5	129.78	14.3436		243.7	252.762	3.71851	11.0387	170	164.8	-3.05882	9.55531	206.85	208.781	0.933527
2024	1				159.3			126	150.098	19.125		296.8	292.333	-1.50514	11.0464	200.9	190.6	-5.12693	9.74025	248.85	241.466	-2.9671
2024	2				168.3			123	164.273	33.5549		269	319.94	18.9369	10.6999	175.8	208.6	18.6576	9.29945	222.4	264.27	18.8265
2024	3				152.9			103.7	140.018	35.0217		229.9	272.701	18.6171	11.8379	153.9	177.8	15.5296	10.2678	191.9	225.25	17.379
2024	4				162.6			136.5	155.295	13.7692		306.5	302.455	-1.31958		204	197.2	-3.33333		255.25	249.828	-2.12429
2024	5				191.9			171.7	201.442	17.3224		343	392.333	14.3829		225.5	255.8	13.4368		284.25	324.067	14.0076
2024	6				190.2			164.2	198.765	21.0505		325.4	387.118	18.967		206	252.4	22.5243		265.7	319.759	20.346				NOAA
2024	7				203			196.5	218.925	11.4122		425.1	426.382	0.301694		274.4	278	1.31195		349.75	352.191	0.697999
2024	8				252.2			215.5	296.415	37.5476		419.4	577.303	37.6499		273.4	376.4	37.6737		346.4	476.852	37.6593				% diff
2024	9				197.8			141.4	210.735	49.0347		357.9	410.432	14.6777		236	267.6	13.3898		296.95	339.016	14.1659				sunspots
2024	10				219.6			144.4	245.07	69.7161		398.3	477.303	19.835		257.4	311.2	20.9013		327.85	394.251	20.2536				above
2024	11																									FLUX
2024	12																									100
2025	1																									Total sunspots/Total Fitted
2025	2
2025	3
2025	4
2025	5
2025	6
2025	7
2025	8
2025	9
2025	10
2025	11
2025	12
																						1K+2K
																						% diff
																						sunspots
																						above
																						FLUX
																						100
																						Total sunspots/Total Fitted
							Wolf				ISN				2K				1K
							% diff				% diff				% diff				% diff
							sunspots				sunspots				sunspots				sunspots
							above				above				above				above
							FLUX				FLUX				FLUX				FLUX
							100				100				100				100
							Total sunspots/Total Fitted					Total sunspots/Total Fitted			Total sunspots/Total Fitted				Total sunspots/Total Fitted

## Sheet: FLUX SvsP
Date	SOLEN	PENTICTON		Date	SOLEN	PENTICTON		Date	SOLEN	PENTICTON		Date	SOLEN	PENTICTON	PENTICTON		Date	SOLEN	PENTICTON
	OBSERVED				OBSERVED	OBSERVED			OBSERVED	OBSERVED			OBSERVED	OBSERVED	ADJUSTED			OBSERVED	OBSERVED		NASA
		OBSERVED
20120131	116.5	116.5		20120731	139.8	139.8		20140131	165.7	165.7
20120130	114.4	114.4		20120730	136.0	136		20140130	160.5	160.5		20150630	100.8	100.8	104.2		20170930	89.4	89.4		2015 152 0 103.2
20120129	109.8	109.8		20120729	131.4	131.4		20140129	156.4	156.4		20150629	97.1	97.1	100.4		20170929	89.7	89.7		2015 153 0 103.9
20120128	114.5	114.5		20120728	126.6	126.6		20140128	157.2	157.2		20150628	97.3	97.3	100.5		20170928	90.9	90.9		2015 154 0 111.6
20120127	128.6	141.7		20120727	123.3	123.3		20140127	143.9	143.9		20150627	97.3	97.3	100.5		20170927	91.0	91		2015 155 0 121.4
20120126	128.2	128.2		20120726	114.7	114.7		20140126	137.9	137.9		20150626	101.2	101.2	104.6		20170926	90.7	90.7		2015 156 0 129.7
20120125	126.4	126.4		20120725	105.4	105.4		20140125	133.2	133.2		20150625	101.8	101.8	105.2		20170925	89.9	89.9		2015 157 0 136.6
20120124	135.7	135.7		20120724	102.4	102.4		20140124	135.5	135.5		20150624	109.5	109.5	113.1		20170924	86.9	86.9		2015 158 0 141.4
20120123	144.3	144.3		20120723	96.7	96.7		20140123	136.3	136.3		20150623	116.1	116.1	120.3		20170923	81.2	81.2		2015 159 0 138.2
20120122	141.0	141		20120722	93.7	93.7		20140122	143.3	143.3		20150622	130.1	246.9	131.3		20170922	77.5	77.5		2015 160 0 140.6
20120121	141.6	141.6		20120721	89.9	89.9		20140121	146.0	146		20150621	131.7	131.7	136		20170921	73.0	73		2015 161 0 139.5
20120120	141.2	141.2		20120720	92.3	92.3		20140120	137.4	137.4		20150620	135.4	135.4	139.8		20170920	73.9	73.9		2015 162 0 144.2
20120119	150.9	157		20120719	100.0	100		20140119	127.5	127.5		20150619	137.3	137.3	141.8		20170919	70.6	70.6		2015 163 0 141.0
20120118	148.1	148.1		20120718	109.5	109.5		20140118	129.6	129.6		20150618	137.3	150.8	141.7		20170918	72.2	72.2		2015 164 0 140.3
20120117	139.0	139		20120717	127.5	127.5		20140117	128.8	128.8		20150617	135.8	135.8	140.2		20170917	72.2	72.2		2015 165 0 135.8
20120116	139.7	139.7		20120716	137.9	154.4		20140116	121.0	121		20150616	136.1	136.1	140.5		20170916	72.1	72.1		2015 166 0 139.1
20120115	133.5	133.5		20120715	140.5	140.5		20140115	126.2	126.2		20150615	134.8	134.8	139.1		20170915	72.8	72.8		2015 167 0 140.5
20120114	132.3	132.3		20120714	147.9	147.9		20140114	137.0	137		20150614	131.7	131.7	135.8		20170914	74.2	74.2		2015 168 0 140.2
20120113	124.1	124.1		20120713	147.2	147.2		20140113	143.3	143.3		20150613	136.1	136.1	140.3		20170913	75.1	75.1		2015 169 0 155.7
20120112	116.8	116.8		20120712	165.4	165.4		20140112	155.3	155.3		20150612	136.7	136.7	141		20170912	75.5	75.5		2015 170 0 141.8
20120111	120.1	120.1		20120711	161.7	161.7		20140111	166.1	166.1		20150611	139.9	139.9	144.2		20170911	79.9	79.9		2015 171 0 139.8
20120110	128.8	128.8		20120710	173.4	173.4		20140110	175.1	175.1		20150610	135.4	135.4	139.5		20170910	92.7	100.2		2015 172 0 136.0
20120109	142.3	142.3		20120709	173.8	173.8		20140109	184.1	184.1		20150609	131.4	136.5	135.7		20170909	107.2	107.2		2015 173 0 255.0
20120108	135.8	135.8		20120708	177.7	177.7		20140108	194.6	194.6		20150608	134.2	134.2	138.2		20170908	116.8	116.8		2015 174 0 119.9
20120107	140.5	140.5		20120707	158.4	158.4		20140107	199.9	237.1		20150607	137.3	137.3	141.4		20170907	128.5	128.5		2015 175 0 113.1
20120106	135.5	135.5		20120706	157.7	157.7		20140106	203.9	203.9		20150606	132.7	132.7	136.6		20170906	127.3	132.9		2015 176 0 105.2
20120105	141.3	141.3		20120705	150.8	164.6		20140105	217.5	217.5		20150605	126.0	126	129.7		20170905	120.5	120.5		2015 177 0 104.6
20120104	136.2	136.2		20120704	149.2	163.2		20140104	213.3	262		20150604	118.0	118	121.4		20170904	134.0	182.5		2015 178 0 100.5
20120103	134.6	134.6		20120703	145.8	145.8		20140103	182.3	182.3		20150603	108.5	108.5	111.6		20170903	120.2	120.2		2015 179 0 100.5
20120102	134.7	134.7		20120702	140.2	165.9		20140102	160.5	160.5		20150602	101.0	101	103.9		20170902	100.0	100		2015 180 0 100.4
20120101	130	no value		20120701	133.4	133.4		20140101	159.6	159.6		20150601	100.4	100.4	103.2		20170901	93.4	93.4		2015 181 0 104.2
Average	132.4	133.187		Average	133.9	136.135		Average	157.4	160.155		Average	122.3	126.81	126.057		Average	91.3	93.3633		2015 182 0 113.3

## Sheet:  SMOOTHED DIFF FLUX
			ADJUSTED	2K	1K	FITTED	ADJUSTED	%G/H	SMOOTHED	SMOOTHED	% DIFF	FITTED	ADJUSTED	%M/N	SMOOTHED	SMOOTHED	% DIFF		FITTED	ADJUSTED	%T/U	SMOOTHED	SMOOTHED	% DIFF		FITTED	ADJUSTED	%T/U	SMOOTHED	SMOOTHED	% DIFF		FITTED	ADJUSTED	%AH/AI	SMOOTHED	SMOOTHED	% DIFF		FITTED	ADJUSTED	%AO/AP	SMOOTHED	SMOOTHED	% DIFF
			FLUX			2K	FLUX	Difference	ADJUSTED	FITTED	SMOOTHED	1K	FLUX	Difference	ADJUSTED	FITTED	SMOOTHED		2K	FLUX	Difference	ADJUSTED	FITTED	SMOOTHED		2K	FLUX	Difference	ADJUSTED	FITTED	SMOOTHED		1K	FLUX	Difference	ADJUSTED	FITTED	SMOOTHED		1K	FLUX	Difference	ADJUSTED	FITTED	SMOOTHED
			STAR			Factor	STAR	Fitted/	FLUX	2K	FITTED	Factor	STAR	Fitted/	FLUX	1K	FITTED		Factor	STAR	Fitted/	FLUX	2K	FITTED		Factor	STAR	Fitted/	FLUX	2K	FITTED		Factor	STAR	Fitted/	FLUX	1K	FITTED		Factor	STAR	Fitted/	FLUX	1K	FITTED
						0.326		Adjusted			2K	0.5		Adjusted			1K		0.322		Adjusted			2K		0.33		Adjusted			2K		0.495		Adjusted			1K		0.505		Adjusted			1K
2012	1	2012	128.1	152	100.2	113.552	128.1	-11.3568			VS	114.1	128.1	-10.929			VS		112.944	128.1	-11.8314			VS		114.16	128.1	-10.8821			VS		113.599	128.1	-11.3201			VS		114.601	128.1	-10.5379			VS
2012	2		104	95.2	61.8	95.0352	104	-8.62			SMOOTHED	94.9	104	-8.75			SMOOTHED		94.6544	104	-8.98615			SMOOTHED		95.416	104	-8.25385			SMOOTHED		94.591	104	-9.04712			SMOOTHED		95.209	104	-8.45288			SMOOTHED
2012	3		113.5	146.3	96.6	111.694	113.5	-1.59137			ADJUSTED	112.3	113.5	-1.05727			ADJUSTED		111.109	113.5	-2.10696			ADJUSTED		112.279	113.5	-1.07577			ADJUSTED		111.817	113.5	-1.48282			ADJUSTED		112.783	113.5	-0.631718			ADJUSTED
2012	4		113.9	162.4	104.6	116.942	113.9	2.67112			FLUX	116.3	113.9	2.10711			FLUX		116.293	113.9	2.10079			FLUX		117.592	113.9	3.24144			FLUX		115.777	113.9	1.64794			FLUX		116.823	113.9	2.56629			FLUX
2012	5		124	204.7	136.3	130.732	124	5.42919				132.15	124	6.57258					129.913	124	4.76887					131.551	124	6.08952					131.469	124	6.02298					132.832	124	7.12218
2012	6		123.4	180.3	120.6	122.778	123.4	-0.504214				124.3	123.4	0.729335					122.057	123.4	-1.08865					123.499	123.4	0.0802269					123.697	123.4	0.240681					124.903	123.4	1.21799
2012	7		138.5	197.3	126.9	128.32	138.5	-7.35032	119.267	116	-2.7392	127.45	138.5	-7.97834	119.267	116.15	-2.61319		127.531	138.5	-7.92014	119.267	115.362	-3.27416		129.109	138.5	-6.78051	119.267	116.638	-2.20423		126.816	138.5	-8.43646	119.267	115.628	-3.05045		128.084	138.5	-7.52022	119.267	116.671	-2.17594
2012	8		118.3	151.2	106.6	113.291	118.3	-4.23398	118.967	116.716	-1.89222	117.3	118.3	-0.845309	118.967	116.852	-1.77746		112.686	118.3	-4.74522	118.967	116.069	-2.43591		113.896	118.3	-3.72274	118.967	117.362	-1.34852		116.767	118.3	-1.29586	118.967	116.324	-2.22172		117.833	118.3	-0.394759	118.967	117.381	-1.3332
2012	9		124.3	175.3	114.1	121.148	124.3	-2.53596	118.737	117.263	-1.24184	121.05	124.3	-2.61464	118.737	117.065	-1.40892		120.447	124.3	-3.10008	118.737	116.609	-1.79224		121.849	124.3	-1.97184	118.737	117.916	-0.691441		120.48	124.3	-3.07361	118.737	116.534	-1.85583		121.62	124.3	-2.15567	118.737	117.595	-0.962014
2012	10		122.4	148.3	92.4	112.346	122.4	-8.21422	119.1	118.09	-0.847866	110.2	122.4	-9.96732	119.1	117.517	-1.32942		111.753	122.4	-8.69886	119.1	117.427	-1.40511		112.939	122.4	-7.72958	119.1	118.754	-0.290617		109.738	122.4	-10.3448	119.1	116.981	-1.77876		110.662	122.4	-9.58987	119.1	118.052	-0.880073
2012	11		118.3	167.5	106.5	118.605	118.3	0.257819	120.029	119.003	-0.854938	117.25	118.3	-0.887574	120.029	118.094	-1.61246		117.935	118.3	-0.308538	120.029	118.328	-1.4172		119.275	118.3	0.824176	120.029	119.678	-0.292672		116.718	118.3	-1.3377	120.029	117.553	-2.06313		117.782	118.3	-0.437447	120.029	118.635	-1.16178
2012	12		105	121.1	75.3	103.479	105	-1.44895	120.054	119.029	-0.854087	101.65	105	-3.19048	120.054	117.531	-2.10148		102.994	105	-1.91029	120.054	118.354	-1.4165		103.963	105	-0.987619	120.054	119.704	-0.291674		101.273	105	-3.54905	120.054	116.996	-2.54737		102.026	105	-2.8319	120.054	118.067	-1.65559
2013	1	2013	123.1	177	119.6	121.702	123.1	-1.13566	118.85	118.714	-0.11471	123.8	123.1	0.568643	118.85	116.39	-2.07019		120.994	123.1	-1.7108	118.85	118.042	-0.679568		122.41	123.1	-0.56052	118.85	119.385	0.450147		123.202	123.1	0.0828595	118.85	115.866	-2.51099		124.398	123.1	1.05443	118.85	116.913	-1.62938
2013	2		101.8	122.9	76.1	104.065	101.8	2.22534	118.05	119.055	0.851002	102.05	101.8	0.24558	118.05	115.869	-1.84773		103.574	101.8	1.74244	118.05	118.379	0.278773		104.557	101.8	2.70825	118.05	119.73	1.42323		101.669	101.8	-0.128193	118.05	115.35	-2.28711		102.43	101.8	0.619352	118.05	116.387	-1.40835
2013	3		110.2	158.9	92.5	115.801	110.2	5.08294	117.192	118.858	1.42159	110.25	110.2	0.0453721	117.192	114.95	-1.91282		115.166	110.2	4.50617	117.192	118.185	0.84723		116.437	110.2	5.65971	117.192	119.531	1.99595		109.787	110.2	-0.374319	117.192	114.441	-2.34758		110.713	110.2	0.465064	117.192	115.459	-1.47806
2013	4		125.9	210.7	130.4	132.688	125.9	5.39174	116.7	119.108	2.06305	129.2	125.9	2.62113	116.7	115.021	-1.43887		131.845	125.9	4.72232	116.7	118.431	1.48365		133.531	125.9	6.06116	116.7	119.784	2.64246		128.548	125.9	2.10326	116.7	114.511	-1.87607		129.852	125.9	3.139	116.7	115.531	-1.00168
2013	5		134.3	223.6	138.2	136.894	134.3	1.9312	118.183	120.921	2.31642	133.1	134.3	-0.893522	118.183	116.863	-1.11761		135.999	134.3	1.26523	118.183	120.223	1.72546		137.788	134.3	2.59717	118.183	121.619	2.90738		132.409	134.3	-1.40804	118.183	116.334	-1.56491		133.791	134.3	-0.379002	118.183	117.391	-0.670322
2013	6		113.7	163.3	91.7	117.236	113.7	3.10976	120.887	123.897	2.48956	109.85	113.7	-3.3861	120.887	119.669	-1.00817		116.583	113.7	2.53527	120.887	123.162	1.88161		117.889	113.7	3.68426	120.887	124.632	3.09751		109.392	113.7	-3.78936	120.887	119.112	-1.46867		110.309	113.7	-2.98285	120.887	120.225	-0.547668
2013	7		119.3	191.1	101	126.299	119.3	5.86639	123.696	127.183	2.81905	114.5	119.3	-4.02347	123.696	123.04	-0.530535		125.534	119.3	5.22565	123.696	126.408	2.19231		127.063	119.3	6.50712	123.696	127.958	3.44578		113.995	119.3	-4.44677	123.696	122.449	-1.00783		115.005	119.3	-3.60017	123.696	123.63	-0.0532388
2013	8		118.3	182.5	107.5	123.495	118.3	4.39138	127.604	131.229	2.84096	117.75	118.3	-0.46492	127.604	127.469	-0.106122		122.765	118.3	3.7743	127.604	130.404	2.19451		124.225	118.3	5.00845	127.604	132.054	3.48741		117.213	118.3	-0.919273	127.604	126.834	-0.60351		118.287	118.3	-0.0105664	127.604	128.103	0.391265
2013	9		103.7	129.5	69.1	106.217	103.7	2.42719	131.887	135.815	2.97798	98.55	103.7	-4.96625	131.887	132.852	0.731368		105.699	103.7	1.92768	131.887	134.934	2.30986		106.735	103.7	2.92671	131.887	136.696	3.6461		98.2045	103.7	-5.29942	131.887	132.164	0.209317		98.8955	103.7	-4.63308	131.887	133.541	1.25342
2013	10		131.2	212.5	140.8	133.275	131.2	1.58155	134.271	138.188	2.91743	134.4	131.2	2.43902	134.271	136.165	1.4104		132.425	131.2	0.933689	134.271	137.278	2.23948		134.125	131.2	2.22942	134.271	139.098	3.59538		133.696	131.2	1.90244	134.271	135.443	0.87294		135.104	131.2	2.97561	134.271	136.886	1.94785
2013	11		145.1	236.8	146.5	141.197	145.1	-2.69001	135	138.972	2.94211	137.25	145.1	-5.41006	135	137.773	2.05401		140.25	145.1	-3.3428	135	138.052	2.2607		142.144	145.1	-2.03722	135	139.892	3.62352		136.517	145.1	-5.91489	135	137.035	1.50755		137.983	145.1	-4.90524	135	138.511	2.60048
2013	12		143.1	270.9	170	152.313	143.1	6.43843	135.446	139.637	3.09467	149	143.1	4.12299	135.446	139.529	3.01474		151.23	143.1	5.6812	135.446	138.709	2.40947		153.397	143.1	7.19567	135.446	140.566	3.77986		148.15	143.1	3.529	135.446	138.774	2.4571		149.85	143.1	4.71698	135.446	140.284	3.57237
2014	1	2014	152.4	269.1	186.7	151.727	152.4	-0.441864	136.888	140.602	2.71343	157.35	152.4	3.24803	136.888	141.785	3.57806		150.65	152.4	-1.14816	136.888	139.662	2.02681		152.803	152.4	0.264436	136.888	141.542	3.40005		156.416	152.4	2.6355	136.888	141.008	3.00982		158.284	152.4	3.86056	136.888	142.563	4.1463
2014	2		166.3	328.7	221.6	171.156	166.3	2.92014	138.225	141.384	2.28559	174.8	166.3	5.11124	138.225	143.538	3.84337		169.841	166.3	2.12952	138.225	140.435	1.59866		172.471	166.3	3.71076	138.225	142.334	2.97251		173.692	166.3	4.44498	138.225	142.742	3.26795		175.908	166.3	5.77751	138.225	144.333	4.41879
2014	3		148.5	290.7	205.4	158.768	148.5	6.91461	140.475	143.299	2.01068	166.7	148.5	12.2559	140.475	146.317	4.15851		157.605	148.5	6.13158	140.475	142.327	1.31803		159.931	148.5	7.69764	140.475	144.273	2.70333		165.673	148.5	11.5643	140.475	145.494	3.57252		167.727	148.5	12.9475	140.475	147.14	4.7445
2014	4		144.8	253.6	176.5	146.674	144.8	1.29392	143.229	144.943	1.19663	152.25	144.8	5.14503	143.229	148.625	3.76727		145.659	144.8	0.59337	143.229	143.95	0.503215		147.688	144.8	1.99448	143.229	145.936	1.89004		151.368	144.8	4.53557	143.229	147.779	3.17644		153.132	144.8	5.75449	143.229	149.471	4.35811
2014	5		132.9	238.4	169.3	141.718	132.9	6.63536	144.396	145.107	0.492818	148.65	132.9	11.851	144.396	149.144	3.28813		140.765	132.9	5.91783	144.396	144.112	-0.196387		142.672	132.9	7.3529	144.396	146.103	1.18202		147.803	132.9	11.2141	144.396	148.292	2.69847		149.497	132.9	12.488	144.396	149.995	3.87778
2014	6		125.8	197.5	144.9	128.385	125.8	2.05485	145.104	144.852	-0.173732	136.45	125.8	8.46582	145.104	149.365	2.93611		127.595	125.8	1.42687	145.104	143.86	-0.857413		129.175	125.8	2.68283	145.104	145.844	0.50995		135.726	125.8	7.8899	145.104	148.511	2.34781		137.175	125.8	9.04173	145.104	150.218	3.52441
2014	7		141.8	227.9	156.1	138.295	141.8	-2.47151	144.921	143.566	-0.935062	142.05	141.8	0.176305	144.921	148.24	2.29004		137.384	141.8	-3.11439	144.921	142.589	-1.60872		139.207	141.8	-1.82863	144.921	144.542	-0.261407		141.269	141.8	-0.374118	144.921	147.397	1.70876		142.831	141.8	0.726728	144.921	149.082	2.87132
2014	8		127.9	203.3	136.5	130.276	127.9	1.85754	142.613	140.561	-1.43844	132.25	127.9	3.40109	142.613	145.085	1.73401		129.463	127.9	1.22174	142.613	139.622	-2.09715		131.089	127.9	2.49335	142.613	141.501	-0.779735		131.567	127.9	2.86747	142.613	144.275	1.16544		132.933	127.9	3.93471	142.613	145.896	2.30258
2014	9		148.1	249.7	173.5	145.402	148.1	-1.82161	139.938	136.759	-2.27128	150.75	148.1	1.78933	139.938	140.985	0.748846		144.403	148.1	-2.49602	139.938	135.866	-2.90925		146.401	148.1	-1.1472	139.938	137.652	-1.63332		149.882	148.1	1.20358	139.938	140.216	0.198705		151.618	148.1	2.37508	139.938	141.755	1.29899
2014	10		152.9	213.3	147.2	133.536	152.9	-12.6646	138.312	134.515	-2.74548	137.6	152.9	-10.0065	138.312	138.352	0.0286188		132.683	152.9	-13.2226	138.312	133.65	-3.37103		134.389	152.9	-12.1066	138.312	135.38	-2.11993		136.864	152.9	-10.4879	138.312	137.609	-0.508947		138.336	152.9	-9.52518	138.312	139.096	0.566185
2014	11		151.4	248.1	165	144.881	151.4	-4.30608	137.254	133.386	-2.81797	146.5	151.4	-3.23646	137.254	136.915	-0.247412		143.888	151.4	-4.96156	137.254	132.535	-3.43826		145.873	151.4	-3.65059	137.254	134.238	-2.19769		145.675	151.4	-3.78137	137.254	136.185	-0.77865		147.325	151.4	-2.69155	137.254	137.644	0.283826
2014	12		153.8	240.8	162.1	142.501	153.8	-7.34668	136.837	132.365	-3.26854	145.05	153.8	-5.68921	136.837	135.35	-1.08706		141.538	153.8	-7.97295	136.837	131.526	-3.88155		143.464	153.8	-6.72042	136.837	133.204	-2.65552		144.239	153.8	-6.21619	136.837	134.637	-1.60848		145.861	153.8	-5.16222	136.837	136.064	-0.565634
2015	1	2015	137.3	204.5	140.6	130.667	137.3	-4.83103	135.558	130.819	-3.49606	134.3	137.3	-2.185	135.558	133.325	-1.64751		129.849	137.3	-5.4268	135.558	129.999	-4.10087		131.485	137.3	-4.23525	135.558	131.639	-2.89125		133.597	137.3	-2.69701	135.558	132.632	-2.15891		135.003	137.3	-1.67298	135.558	134.018	-1.1361
2015	2		126	172.1	116.3	120.105	126	-4.67889	133.437	128.805	-3.47187	122.15	126	-3.05556	133.437	131.14	-1.72209		119.416	126	-5.22524	133.437	128.01	-4.06777		120.793	126	-4.13254	133.437	129.6	-2.87597		121.569	126	-3.51706	133.437	130.468	-2.22525		122.731	126	-2.59405	133.437	131.811	-1.21894
2015	3		124.6	167.4	113.9	118.572	124.6	-4.83756	130.717	126.568	-3.17413	120.95	124.6	-2.92937	130.717	128.55	-1.65753		117.903	124.6	-5.37496	130.717	125.8	-3.76143		119.242	124.6	-4.30016	130.717	127.335	-2.58683		120.381	124.6	-3.38644	130.717	127.904	-2.15135		121.519	124.6	-2.47231	130.717	129.195	-1.16371
2015	4		129.7	211.7	141.6	133.014	129.7	2.55528	126.758	124.176	-2.03758	134.8	129.7	3.93215	126.758	125.677	-0.853001		132.167	129.7	1.90239	126.758	123.437	-2.62007		133.861	129.7	3.20817	126.758	124.914	-1.4551		134.092	129.7	3.38628	126.758	125.06	-1.33957		135.508	129.7	4.47803	126.758	126.294	-0.366429
2015	5		122.6	197.2	135.2	128.287	122.6	4.63883	122.837	121.835	-0.816024	131.6	122.6	7.34095	122.837	122.981	0.117025		127.498	122.6	3.99543	122.837	121.125	-1.39372		129.076	122.6	5.28222	122.837	122.545	-0.238323		130.924	122.6	6.78956	122.837	122.391	-0.363132		132.276	122.6	7.89233	122.837	123.571	0.597181
2015	6		126.1	163.5	103.9	117.301	126.1	-6.9778	119.138	119.051	-0.0729969	115.95	126.1	-8.04917	119.138	119.725	0.493128		116.647	126.1	-7.49643	119.138	118.375	-0.639961		117.955	126.1	-6.45916	119.138	119.726	0.493967		115.43	126.1	-8.46114	119.138	119.168	0.0253908		116.47	126.1	-7.63719	119.138	120.282	0.960865
2015	7		110.8	148.1	99.9	112.281	110.8	1.33628	115.742	116.775	0.893074	113.95	110.8	2.84296	115.742	116.669	0.800994		111.688	110.8	0.801625	115.742	116.128	0.333595		112.873	110.8	1.87094	115.742	117.423	1.45255		113.451	110.8	2.39215	115.742	116.142	0.345939		114.45	110.8	3.29377	115.742	117.195	1.25605
2015	8		108	134.8	87.8	107.945	108	-0.0511111	113.15	116.073	2.58336	107.9	108	-0.0925926	113.15	115.1	1.72338		107.406	108	-0.55037	113.15	115.434	2.01868		108.484	108	0.448148	113.15	116.712	3.14803		107.461	108	-0.499074	113.15	114.589	1.27176		108.339	108	0.313889	113.15	115.611	2.17499
2015	9		102.7	153.5	97.9	114.041	102.7	11.0428	110.692	115.244	4.11306	112.95	102.7	9.98053	110.692	113.681	2.70082		113.427	102.7	10.445	110.692	114.616	3.54503		114.655	102.7	11.6407	110.692	115.873	4.6811		112.46	102.7	9.50389	110.692	113.184	2.252		113.44	102.7	10.4572	110.692	114.178	3.14965
2015	10		103.3	133.4	84.9	107.488	103.3	4.0546	107.787	112.598	4.46337	106.45	103.3	3.04937	107.787	110.881	2.87023		106.955	103.3	3.53804	107.787	112.002	3.91015		108.022	103.3	4.57115	107.787	113.195	5.01658		106.025	103.3	2.63843	107.787	110.412	2.43529		106.875	103.3	3.46031	107.787	111.35	3.30517
2015	11		106.9	155.7	97.9	114.758	106.9	7.35098	105.162	109.349	3.98128	112.95	106.9	5.65949	105.162	107.708	2.42086		114.135	106.9	6.76838	105.162	108.793	3.45217		115.381	106.9	7.93358	105.162	109.906	4.5104		112.46	106.9	5.20159	105.162	107.271	2.00523		113.44	106.9	6.1174	105.162	108.145	2.83648
2015	12		109.5	128.2	72.9	105.793	109.5	-3.38521	102.292	106.201	3.82146	100.45	109.5	-8.26484	102.292	104.763	2.41548		105.28	109.5	-3.85352	102.292	105.683	3.31526		106.306	109.5	-2.91689	102.292	106.719	4.32766		100.085	109.5	-8.59772	102.292	104.355	2.01699		100.815	109.5	-7.93196	102.292	105.17	2.81397
2016	1	2016	100.1	149.6	83.1	112.77	100.1	12.6569	99.6458	103.411	3.77823	105.55	100.1	5.44456	99.6458	102.16	2.52352		112.171	100.1	12.0591	99.6458	102.927	3.29295		113.368	100.1	13.2547	99.6458	103.894	4.26352		105.135	100.1	5.02947	99.6458	101.779	2.14056		105.965	100.1	5.85964	99.6458	102.542	2.90648
2016	2		101	175.3	98.5	121.148	101	19.9483	97.8625	101.529	3.74698	113.25	101	12.1287	97.8625	100.502	2.69724		120.447	101	19.2541	97.8625	101.069	3.27644		121.849	101	20.6426	97.8625	101.99	4.21752		112.757	101	11.6411	97.8625	100.137	2.32424		113.743	101	12.6163	97.8625	100.867	3.07023
2016	3		90.6	103.2	63.6	97.6432	90.6	7.77395	96.4083	99.6658	3.37878	95.8	90.6	5.73951	96.4083	99.0042	2.69254		97.2304	90.6	7.31832	96.4083	99.2281	2.92486		98.056	90.6	8.22958	96.4083	100.103	3.8327		95.482	90.6	5.38852	96.4083	98.6541	2.32946		96.118	90.6	6.09051	96.4083	99.3542	3.05562
2016	4		94	81.1	57.5	90.4386	94	-3.78872	95.0875	97.5101	2.54774	92.75	94	-1.32979	95.0875	97.225	2.24793		90.1142	94	-4.13383	95.0875	97.0989	2.11533		90.763	94	-3.44362	95.0875	97.9213	2.98015		92.4625	94	-1.63564	95.0875	96.8927	1.89851		93.0375	94	-1.02394	95.0875	97.5573	2.59734
2016	5		95.3	88.6	67	92.8836	95.3	-2.53557	93.1	94.9483	1.98525	97.5	95.3	2.3085	93.1	95.0375	2.0811		92.5292	95.3	-2.90745	93.1	94.5685	1.57737		93.238	95.3	-2.16369	93.1	95.328	2.39313		97.165	95.3	1.95698	93.1	94.7271	1.74772		97.835	95.3	2.66002	93.1	95.3479	2.41447
2016	6		84.5	40.3	30.7	77.1378	84.5	-8.71266	90.3208	92.1528	2.02831	79.35	84.5	-6.09467	90.3208	92.7375	2.67565		76.9766	84.5	-8.90343	90.3208	91.8074	1.64586		77.299	84.5	-8.52189	90.3208	92.4982	2.41076		79.1965	84.5	-6.27633	90.3208	92.4501	2.35748		79.5035	84.5	-5.91302	90.3208	93.0249	2.99382
2016	7		88.9	65.9	48.2	85.4834	88.9	-3.84319	87.7417	89.4701	1.96992	88.1	88.9	-0.899888	87.7417	90.7667	3.44762		85.2198	88.9	-4.13971	87.7417	89.1576	1.61374		85.747	88.9	-3.54668	87.7417	89.7826	2.3261		87.859	88.9	-1.17098	87.7417	90.499	3.14256		88.341	88.9	-0.628796	87.7417	91.0343	3.75268
2016	8		87.1	78.5	59.9	89.591	87.1	2.85993	85.6083	86.2006	0.691833	93.95	87.1	7.86452	85.6083	88.3229	3.17093		89.277	87.1	2.49943	85.6083	85.9282	0.37364		89.905	87.1	3.22044	85.6083	86.473	1.01003		93.6505	87.1	7.52067	85.6083	88.0797	2.88681		94.2495	87.1	8.20838	85.6083	88.5661	3.45505
2016	9		88.7	72.6	53.9	87.6676	88.7	-1.16392	83.8292	83.3522	-0.569004	90.95	88.7	2.53664	83.8292	86.0062	2.59705		87.3772	88.7	-1.49132	83.8292	83.1147	-0.852259		87.958	88.7	-0.836528	83.8292	83.5896	-0.28575		90.6805	88.7	2.23281	83.8292	85.7862	2.33453		91.2195	88.7	2.84047	83.8292	86.2263	2.85956
2016	10		85.6	55.6	43.5	82.1256	85.6	-4.05888	82.5833	82.0169	-0.685853	85.75	85.6	0.175234	82.5833	84.6458	2.49748		81.9032	85.6	-4.31869	82.5833	81.7959	-0.953542		82.348	85.6	-3.79907	82.5833	82.238	-0.418163		85.5325	85.6	-0.0788551	82.5833	84.4394	2.24748		85.9675	85.6	0.429322	82.5833	84.8523	2.74748
2016	11		76.9	44.9	34.3	78.6374	76.9	2.2593	81.1958	80.9506	-0.301976	81.15	76.9	5.52666	81.1958	83.2583	2.54015		78.4578	76.9	2.02575	81.1958	80.7427	-0.558126		78.817	76.9	2.49285	81.1958	81.1586	-0.0458254		80.9785	76.9	5.30364	81.1958	83.0657	2.30297		81.3215	76.9	5.74967	81.1958	83.4509	2.77734
2016	12		72.8	33.2	26.1	74.8232	72.8	2.77912	80.05	80.2932	0.303821	77.05	72.8	5.83791	80.05	82.3104	2.82376		74.6904	72.8	2.5967	80.05	80.0933	0.0540808		74.956	72.8	2.96154	80.05	80.4931	0.55356		76.9195	72.8	5.65865	80.05	82.1273	2.59502		77.1805	72.8	6.01717	80.05	82.4935	3.05249
2017	1	2017	74.9	47.1	35.3	79.3546	74.9	5.9474	79.3667	79.9455	0.729284	81.65	74.9	9.01202	79.3667	81.6979	2.93732		79.1662	74.9	5.69586	79.3667	79.7498	0.48277		79.543	74.9	6.19893	79.3667	80.1411	0.975798		81.4735	74.9	8.77637	79.3667	81.5209	2.71433		81.8265	74.9	9.24766	79.3667	81.8749	3.16031
2017	2		75	37.1	29	76.0946	75	1.45947	78.6875	79.2677	0.737305	78.5	75	4.66667	78.6875	80.6521	2.49669		75.9462	75	1.2616	78.6875	79.0803	0.499232		76.243	75	1.65733	78.6875	79.455	0.975377		78.355	75	4.47333	78.6875	80.4856	2.28507		78.645	75	4.86	78.6875	80.8186	2.70831
2017	3		73.9	31.7	21.9	74.3342	73.9	0.587551	78.5333	79.1848	0.829552	74.95	73.9	1.42084	78.5333	80.2521	2.18856		74.2074	73.9	0.415968	78.5333	78.9985	0.592307		74.461	73.9	0.759134	78.5333	79.3711	1.0668		74.8405	73.9	1.27267	78.5333	80.0896	1.98162		75.0595	73.9	1.56901	78.5333	80.4146	2.39551
2017	4		80.8	54.3	33.9	81.7018	80.8	1.11609	78.2667	79.0191	0.961361	80.95	80.8	0.185644	78.2667	79.8062	1.9671		81.4846	80.8	0.847277	78.2667	78.8348	0.725905		81.919	80.8	1.3849	78.2667	79.2034	1.19682		80.7805	80.8	-0.0241337	78.2667	79.6482	1.76515		81.1195	80.8	0.395421	78.2667	79.9643	2.16905
2017	5		75.2	36.9	24	76.0294	75.2	1.10293	77.5875	78.2734	0.883991	76	75.2	1.06383	77.5875	78.8083	1.57349		75.8818	75.2	0.906649	77.5875	78.0982	0.658268		76.177	75.2	1.2992	77.5875	78.4485	1.10971		75.88	75.2	0.904255	77.5875	78.6603	1.38263		76.12	75.2	1.2234	77.5875	78.9564	1.76435
2017	6		77.1	43.6	28.2	78.2136	77.1	1.44436	77.1792	77.6635	0.627512	78.1	77.1	1.29702	77.1792	78.0333	1.10673		78.0392	77.1	1.21816	77.1792	77.4958	0.41029		78.388	77.1	1.67056	77.1792	77.8311	0.844734		77.959	77.1	1.11414	77.1792	77.893	0.924904		78.241	77.1	1.4799	77.1792	78.1737	1.28856
2017	7		79.9	37	21.3	76.062	79.9	-4.8035	76.7333	77.0183	0.371329	74.65	79.9	-6.57071	76.7333	77.1896	0.594592		75.914	79.9	-4.98874	76.7333	76.8585	0.163162		76.21	79.9	-4.61827	76.7333	77.178	0.579496		74.5435	79.9	-6.70401	76.7333	77.0577	0.422703		74.7565	79.9	-6.43742	76.7333	77.3215	0.76648
2017	8		79.8	57.5	36.6	82.745	79.8	3.69048	76.2333	76.4301	0.258122	82.3	79.8	3.13283	76.2333	76.3396	0.139375		82.515	79.8	3.40226	76.2333	76.2776	0.0580564		82.975	79.8	3.9787	76.2333	76.5826	0.458188		82.117	79.8	2.90351	76.2333	76.2162	-0.0224913		82.483	79.8	3.36216	76.2333	76.463	0.301241
2017	9		92.3	87.5	58	92.525	92.3	0.24377	75.7708	75.9588	0.248029	93	92.3	0.758397	75.7708	75.6792	-0.120979		92.175	92.3	-0.135428	75.7708	75.812	0.0543745		92.875	92.3	0.622969	75.7708	76.1055	0.441683		92.71	92.3	0.444204	75.7708	75.5624	-0.275117		93.29	92.3	1.07259	75.7708	75.796	0.0331592
2017	10		75.6	28.5	18	73.291	75.6	-3.05423	75.0792	75.2239	0.192785	73	75.6	-3.43915	75.0792	74.8604	-0.291359		73.177	75.6	-3.20503	75.0792	75.0862	0.00935679		73.405	75.6	-2.90344	75.0792	75.3616	0.376214		72.91	75.6	-3.5582	75.0792	74.7518	-0.436012		73.09	75.6	-3.32011	75.0792	74.969	-0.146706
2017	11		70.6	17.1	11.9	69.5746	70.6	-1.45241	74.5333	74.6127	0.106429	69.95	70.6	-0.92068	74.5333	74.2062	-0.438842		69.5062	70.6	-1.54929	74.5333	74.4824	-0.0682804		69.643	70.6	-1.35552	74.5333	74.7429	0.281138		69.8905	70.6	-1.00496	74.5333	74.1042	-0.575777		70.0095	70.6	-0.836402	74.5333	74.3083	-0.301906
2017	12		69.3	16.1	11.3	69.2486	69.3	-0.0741703	74.3167	74.2174	-0.133595	69.65	69.3	0.505051	74.3167	73.7875	-0.712043		69.1842	69.3	-0.1671	74.3167	74.092	-0.302288		69.313	69.3	0.018759	74.3167	74.3427	0.0350976		69.5935	69.3	0.423521	74.3167	73.6896	-0.843743		69.7065	69.3	0.58658	74.3167	73.8854	-0.580343
2018	1	2018	67.7	16.7	9.6	69.4442	67.7	2.57637	73.9	73.6252	-0.371922	68.8	67.7	1.62482	73.9	73.1792	-0.975417		69.3774	67.7	2.4777	73.9	73.5071	-0.531732		69.511	67.7	2.67504	73.9	73.7432	-0.212111		68.752	67.7	1.55391	73.9	73.0874	-1.09963		68.848	67.7	1.69572	73.9	73.271	-0.851207
2018	2		70.2	24.2	13.9	71.8892	70.2	2.40627	73.2083	72.7952	-0.564314	70.95	70.2	1.06838	73.2083	72.2958	-1.24644		71.7924	70.2	2.26838	73.2083	72.6873	-0.711725		71.986	70.2	2.54416	73.2083	72.9031	-0.416904		70.8805	70.2	0.969373	73.2083	72.2129	-1.35976		71.0195	70.2	1.16738	73.2083	72.3788	-1.13312
2018	3		67.6	9.9	5.3	67.2274	67.6	-0.551183	71.8625	71.2847	-0.803978	66.65	67.6	-1.40533	71.8625	70.6917	-1.62927		67.1878	67.6	-0.609763	71.8625	71.1954	-0.928359		67.267	67.6	-0.492604	71.8625	71.3741	-0.679596		66.6235	67.6	-1.44453	71.8625	70.6247	-1.72239		66.6765	67.6	-1.36612	71.8625	70.7586	-1.53615
2018	4		70.5	22	11.2	71.172	70.5	0.953191	70.6208	70.0161	-0.856369	69.6	70.5	-1.2766	70.6208	69.4021	-1.72577		71.084	70.5	0.828369	70.6208	69.9422	-0.960894		71.26	70.5	1.07801	70.6208	70.0899	-0.751844		69.544	70.5	-1.35603	70.6208	69.3481	-1.80226		69.656	70.5	-1.19716	70.6208	69.4561	-1.64927
2018	5		72.4	24.2	15.3	71.8892	72.4	-0.705525	70.2167	69.7444	-0.672597	71.65	72.4	-1.03591	70.2167	69.1167	-1.56658		71.7924	72.4	-0.839227	70.2167	69.6739	-0.772977		71.986	72.4	-0.571823	70.2167	69.8149	-0.572217		71.5735	72.4	-1.14157	70.2167	69.0655	-1.63945		71.7265	72.4	-0.930249	70.2167	69.1678	-1.49371
2018	6		74.7	27.2	16.8	72.8672	74.7	-2.45355	70.0208	69.6412	-0.542231	72.4	74.7	-3.07898	70.0208	68.9833	-1.4817		72.7584	74.7	-2.5992	70.0208	69.5719	-0.641083		72.976	74.7	-2.3079	70.0208	69.7104	-0.44338		72.316	74.7	-3.19143	70.0208	68.9335	-1.55287		72.484	74.7	-2.96653	70.0208	69.0332	-1.41053
2018	7		72.3	9.8	3.5	67.1948	72.3	-7.06113	70.0208	69.5515	-0.670265	65.75	72.3	-9.05947	70.0208	68.9396	-1.54418		67.1556	72.3	-7.11535	70.0208	69.4834	-0.767545		67.234	72.3	-7.00692	70.0208	69.6196	-0.572984		65.7325	72.3	-9.08368	70.0208	68.8902	-1.61473		65.7675	72.3	-9.03527	70.0208	68.989	-1.47364
2018	8		70.8	23.6	12	71.6936	70.8	1.26215	70.0292	69.2866	-1.06032	70	70.8	-1.12994	70.0292	68.7187	-1.87124		71.5992	70.8	1.12881	70.0292	69.2218	-1.15295		71.788	70.8	1.39548	70.0292	69.3515	-0.967692		69.94	70.8	-1.21469	70.0292	68.6716	-1.93863		70.06	70.8	-1.0452	70.0292	68.7659	-1.80386
2018	9		69	10.2	5.6	67.3252	69	-2.42725	70.1083	69.182	-1.32123	66.8	69	-3.18841	70.1083	68.6333	-2.10389		67.2844	69	-2.48638	70.1083	69.1185	-1.41192		67.366	69	-2.36812	70.1083	69.2456	-1.23054		66.772	69	-3.22899	70.1083	68.587	-2.16998		66.828	69	-3.14783	70.1083	68.6797	-2.0378
2018	10		69.1	12.4	8.5	68.0424	69.1	-1.53054	70.3417	69.2337	-1.57518	68.25	69.1	-1.2301	70.3417	68.7667	-2.23907		67.9928	69.1	-1.60232	70.3417	69.1694	-1.66647		68.092	69.1	-1.45876	70.3417	69.2979	-1.48389		68.2075	69.1	-1.29161	70.3417	68.719	-2.30684		68.2925	69.1	-1.1686	70.3417	68.8143	-2.17131
2018	11		67.4	13.2	7.7	68.3032	67.4	1.34006	70.4583	69.0829	-1.95215	67.85	67.4	0.667656	70.4583	68.7229	-2.46304		68.2504	67.4	1.26172	70.4583	69.0205	-2.04066		68.356	67.4	1.4184	70.4583	69.1453	-1.86363		67.8115	67.4	0.610534	70.4583	68.6757	-2.53007		67.8885	67.4	0.724777	70.4583	68.7701	-2.39601
2018	12		67.8	12.4	9.1	68.0424	67.8	0.357522	70.2917	68.8479	-2.05398	68.55	67.8	1.10619	70.2917	68.4604	-2.60522		67.9928	67.8	0.284366	70.2917	68.7884	-2.1386		68.092	67.8	0.430678	70.2917	68.9074	-1.96935		68.5045	67.8	1.03909	70.2917	68.4158	-2.66867		68.5955	67.8	1.1733	70.2917	68.505	-2.54176
2019	1	2019	69.2	13.8	9.7	68.4988	69.2	-1.01329	69.9833	68.7297	-1.79131	68.85	69.2	-0.50578	69.9833	68.2521	-2.4738		68.4436	69.2	-1.09306	69.9833	68.6717	-1.87423		68.554	69.2	-0.933526	69.9833	68.7878	-1.70838		68.8015	69.2	-0.575867	69.9833	68.2096	-2.53456		68.8985	69.2	-0.435694	69.9833	68.2946	-2.41304
2019	2		68.9	7.6	3.2	66.4776	68.9	-3.51582	69.7708	68.5463	-1.75502	65.6	68.9	-4.78955	69.7708	68.0396	-2.48134		66.4472	68.9	-3.55994	69.7708	68.4906	-1.83497		66.508	68.9	-3.4717	69.7708	68.6021	-1.67507		65.584	68.9	-4.81277	69.7708	67.9992	-2.53924		65.616	68.9	-4.76633	69.7708	68.08	-2.42344
2019	3		70.8	18.8	11.9	70.1288	70.8	-0.948023	69.6708	68.2788	-1.99809	69.95	70.8	-1.20056	69.6708	67.7792	-2.71515		70.0536	70.8	-1.05424	69.6708	68.2262	-2.07344		70.204	70.8	-0.841808	69.6708	68.3312	-1.92273		69.8905	70.8	-1.2846	69.6708	67.7414	-2.76939		70.0095	70.8	-1.11653	69.6708	67.817	-2.66091
2019	4		72.9	16.9	11	69.5094	72.9	-4.65103	69.5708	68.1348	-2.06418	69.5	72.9	-4.66392	69.5708	67.6063	-2.82386		69.4418	72.9	-4.74376	69.5708	68.084	-2.1371		69.577	72.9	-4.5583	69.5708	68.1855	-1.99126		69.445	72.9	-4.73937	69.5708	67.5702	-2.8757		69.555	72.9	-4.58848	69.5708	67.6423	-2.77202
2019	5		72.8	18.2	13.4	69.9332	72.8	-3.93791	69.5375	68.0438	-2.14811	70.7	72.8	-2.88462	69.5375	67.4417	-3.01396		69.8604	72.8	-4.03791	69.5375	67.9941	-2.21946		70.006	72.8	-3.83791	69.5375	68.0934	-2.07676		70.633	72.8	-2.97665	69.5375	67.4072	-3.06345		70.767	72.8	-2.79258	69.5375	67.4761	-2.96447
2019	6		70.3	15.9	6.1	69.1834	70.3	-1.58834	69.625	68.0546	-2.25548	67.05	70.3	-4.62304	69.625	67.3417	-3.27947		69.1198	70.3	-1.67881	69.625	68.0049	-2.32693		69.247	70.3	-1.49787	69.625	68.1044	-2.18402		67.0195	70.3	-4.66643	69.625	67.3083	-3.32747		67.0805	70.3	-4.57966	69.625	67.3751	-3.23148
2019	7		69.3	12.4	4.2	68.0424	69.3	-1.81472	69.6875	68.1809	-2.16187	66.1	69.3	-4.6176	69.6875	67.3062	-3.41704		67.9928	69.3	-1.88629	69.6875	68.1296	-2.23548		68.092	69.3	-1.74315	69.6875	68.2323	-2.08825		66.079	69.3	-4.64791	69.6875	67.2732	-3.46448		66.121	69.3	-4.5873	69.6875	67.3393	-3.3696
2019	8		68.7	7.5	1.1	66.445	68.7	-3.28239	69.7333	68.3005	-2.05476	64.55	68.7	-6.04076	69.7333	67.3458	-3.42376		66.415	68.7	-3.32606	69.7333	68.2477	-2.13043		66.475	68.7	-3.23872	69.7333	68.3533	-1.97909		64.5445	68.7	-6.04876	69.7333	67.3124	-3.47174		64.5555	68.7	-6.03275	69.7333	67.3793	-3.37578
2019	9		68.7	6.6	4	66.1516	68.7	-3.70946	69.6958	68.1769	-2.17941	66	68.7	-3.93013	69.6958	67.1583	-3.64082		66.1252	68.7	-3.74789	69.6958	68.1256	-2.25294		66.178	68.7	-3.67103	69.6958	68.2281	-2.10588		65.98	68.7	-3.95924	69.6958	67.1268	-3.68614		66.02	68.7	-3.90102	69.6958	67.1899	-3.5955
2019	10		67	5.4	1.8	65.7604	67	-1.85015	69.5208	68.0655	-2.09339	64.9	67	-3.13433	69.5208	66.9	-3.76985		65.7388	67	-1.88239	69.5208	68.0156	-2.16514		65.782	67	-1.81791	69.5208	68.1154	-2.02164		64.891	67	-3.14776	69.5208	66.871	-3.81157		64.909	67	-3.1209	69.5208	66.929	-3.72814
2019	11		68.7	13.5	6.5	68.401	68.7	-0.435226	69.3083	67.9745	-1.92452	67.25	68.7	-2.11063	69.3083	66.6188	-3.88061		68.347	68.7	-0.513828	69.3083	67.9257	-1.99488		68.455	68.7	-0.356623	69.3083	68.0233	-1.85415		67.2175	68.7	-2.15793	69.3083	66.5926	-3.91839		67.2825	68.7	-2.06332	69.3083	66.6449	-3.84282
2019	12		68.6	12.9	5.5	68.2054	68.6	-0.575219	69.275	67.9038	-1.97929	66.75	68.6	-2.69679	69.275	66.4917	-4.0178		68.1538	68.6	-0.650437	69.275	67.8559	-2.04843		68.257	68.6	-0.5	69.275	67.9518	-1.91014		66.7225	68.6	-2.73688	69.275	66.4668	-4.05377		66.7775	68.6	-2.65671	69.275	66.5166	-3.98184
2020	1	2020	69.9	22.6	11.6	71.3676	69.9	2.09957	69.4375	68.0465	-2.00328	69.8	69.9	-0.143062	69.4375	66.7021	-3.93939		71.2772	69.9	1.97024	69.4375	67.9968	-2.07478		71.458	69.9	2.2289	69.4375	68.0961	-1.93177		69.742	69.9	-0.226037	69.4375	66.6751	-3.97831		69.858	69.9	-0.0600858	69.4375	66.7291	-3.90048
2020	2		69.3	7.6	3.2	66.4776	69.3	-4.07273	69.7375	68.4132	-1.89894	65.6	69.3	-5.33911	69.7375	67.05	-3.85374		66.4472	69.3	-4.11659	69.7375	68.3591	-1.97659		66.508	69.3	-4.02886	69.7375	68.4674	-1.82129		65.584	69.3	-5.36219	69.7375	67.0195	-3.89747		65.616	69.3	-5.31602	69.7375	67.0805	-3.81
2020	3		69.5	9.7	2.9	67.1622	69.5	-3.36374	70.0458	68.8153	-1.75677	65.45	69.5	-5.82734	70.0458	67.2979	-3.92303		67.1234	69.5	-3.41957	70.0458	68.7562	-1.84112		67.201	69.5	-3.30791	70.0458	68.8744	-1.67242		65.4355	69.5	-5.8482	70.0458	67.2649	-3.97011		65.4645	69.5	-5.80647	70.0458	67.3309	-3.87594
2020	4		70	17.8	7.6	69.8028	70	-0.281714	70.4583	69.4075	-1.49139	67.8	70	-3.14286	70.4583	67.7646	-3.82318		69.7316	70	-0.383429	70.4583	69.3412	-1.58556		69.874	70	-0.18	70.4583	69.4739	-1.39722		67.762	70	-3.19714	70.4583	67.7269	-3.87661		67.838	70	-3.08857	70.4583	67.8022	-3.76975
2020	5		70.6	10.6	3.3	67.4556	70.6	-4.45382	71.5625	70.6368	-1.29353	65.65	70.6	-7.01133	71.5625	68.9104	-3.70597		67.4132	70.6	-4.51388	71.5625	70.5554	-1.40732		67.498	70.6	-4.39377	71.5625	70.7182	-1.17974		65.6335	70.6	-7.0347	71.5625	68.8613	-3.77459		65.6665	70.6	-6.98796	71.5625	68.9595	-3.63735
2020	6		71.7	18.3	10.1	69.9658	71.7	-2.41869	73.0167	72.1011	-1.25391	69.05	71.7	-3.69596	73.0167	70.1771	-3.88895		69.8926	71.7	-2.52078	73.0167	72.0017	-1.39005		70.039	71.7	-2.3166	73.0167	72.2005	-1.11778		68.9995	71.7	-3.76639	73.0167	70.1153	-3.97355		69.1005	71.7	-3.62552	73.0167	70.2389	-3.80435
2020	7		71.8	20.5	10.3	70.683	71.8	-1.55571	73.8208	72.9582	-1.16854	69.15	71.8	-3.69081	73.8208	70.8792	-3.98487		70.601	71.8	-1.66992	73.8208	72.8483	-1.31744		70.765	71.8	-1.4415	73.8208	73.0681	-1.01964		69.0985	71.8	-3.76253	73.8208	70.8104	-4.07806		69.2015	71.8	-3.61908	73.8208	70.948	-3.89169
2020	8		73.4	26.4	11.7	72.6064	73.4	-1.0812	74.1042	73.4689	-0.857206	69.85	73.4	-4.83651	74.1042	71.3208	-3.75597		72.5008	73.4	-1.22507	74.1042	73.3528	-1.01399		72.712	73.4	-0.93733	74.1042	73.5851	-0.700422		69.7915	73.4	-4.91621	74.1042	71.2476	-3.85477		69.9085	73.4	-4.75681	74.1042	71.394	-3.65718
2020	9		71.4	17.3	5.3	69.6398	71.4	-2.46527	74.4708	74.4076	-0.0849773	66.65	71.4	-6.65266	74.4708	72.2063	-3.0409		69.5706	71.4	-2.56218	74.4708	74.2799	-0.256454		69.709	71.4	-2.36835	74.4708	74.5353	0.0864992		66.6235	71.4	-6.68978	74.4708	72.1242	-3.15109		66.6765	71.4	-6.61555	74.4708	72.2883	-2.93071
2020	10		74.2	38.3	22.9	76.4858	74.2	3.08059	74.975	75.6396	0.886373	75.45	74.2	1.68464	74.975	73.5125	-1.95065		76.3326	74.2	2.87412	74.975	75.4967	0.695888		76.639	74.2	3.28706	74.975	75.7824	1.07686		75.3355	74.2	1.53032	74.975	73.4174	-2.07753		75.5645	74.2	1.83895	74.975	73.6076	-1.82377
2020	11		88	71.1	40.4	87.1786	88	-0.933409	75.5125	76.9028	1.84116	84.2	88	-4.31818	75.5125	74.95	-0.74491		86.8942	88	-1.25659	75.5125	76.7445	1.63151		87.463	88	-0.610227	75.5125	77.0611	2.05082		83.998	88	-4.54773	75.5125	74.8405	-0.889919		84.402	88	-4.08864	75.5125	75.0595	-0.599901
2020	12		84.2	63.1	32.4	84.5706	84.2	0.440143	76.2042	78.4771	2.98271	80.2	84.2	-4.75059	76.2042	76.6313	0.560446		84.3182	84.2	0.14038	76.2042	78.2995	2.74961		84.823	84.2	0.739905	76.2042	78.6548	3.21581		80.038	84.2	-4.94299	76.2042	76.5049	0.394691		80.362	84.2	-4.55819	76.2042	76.7576	0.726202
2021	1		73.6	35.5	18.4	75.573	73.6	2.68071	77.1167	80.2579	4.07334	73.2	73.6	-0.543478	77.1167	78.5104	1.80733		75.431	73.6	2.48777	77.1167	80.0584	3.81466		75.715	73.6	2.87364	77.1167	80.4574	4.33202		73.108	73.6	-0.668478	77.1167	78.3653	1.61916		73.292	73.6	-0.418478	77.1167	78.6555	1.99549
2021	2		72.4	32.3	17.6	74.5298	72.4	2.94171	77.8708	81.5728	4.75393	72.8	72.4	0.552486	77.8708	79.9271	2.64059		74.4006	72.4	2.76326	77.8708	81.3571	4.47704		74.659	72.4	3.12017	77.8708	81.7884	5.03082		72.712	72.4	0.430939	77.8708	79.7678	2.43606		72.888	72.4	0.674033	77.8708	80.0864	2.84512
2021	3		75.2	54.1	31	81.6366	75.2	8.55931	78.8333	83.3916	5.78211	79.5	75.2	5.71809	78.8333	81.8688	3.85042		81.4202	75.2	8.27154	78.8333	83.1536	5.4803		81.853	75.2	8.84707	78.8333	83.6295	6.08393		79.345	75.2	5.51197	78.8333	81.6901	3.62376		79.655	75.2	5.9242	78.8333	82.0474	4.07709
2021	4		76.4	64.1	42.2	84.8966	76.4	11.1212	80.1208	85.4617	6.66597	85.1	76.4	11.3874	80.1208	84.0042	4.84685		84.6402	76.4	10.7856	80.1208	85.1983	6.3373		85.153	76.4	11.4568	80.1208	85.725	6.99464		84.889	76.4	11.1113	80.1208	83.8041	4.59717		85.311	76.4	11.6636	80.1208	84.2042	5.09652
2021	5		77.1	57.3	37.7	82.6798	77.1	7.23709	80.5583	86.2183	7.02587	82.85	77.1	7.45785	80.5583	84.8854	5.37137		82.4506	77.1	6.93982	80.5583	85.9456	6.68746		82.909	77.1	7.53437	80.5583	86.4909	7.36428		82.6615	77.1	7.21336	80.5583	84.6766	5.11211		83.0385	77.1	7.70233	80.5583	85.0943	5.63062
2021	6		81.8	87.5	56.4	92.525	81.8	13.1112	81.0583	87.4801	7.92246	92.2	81.8	12.7139	81.0583	86.4146	6.6079		92.175	81.8	12.6834	81.0583	87.192	7.56704		92.875	81.8	13.5391	81.0583	87.7683	8.27789		91.918	81.8	12.3692	81.0583	86.1904	6.33137		92.482	81.8	13.0587	81.0583	86.6387	6.88442
2021	7		83.6	82.4	54.2	90.8624	83.6	8.68708	82.8292	90.0026	8.66049	91.1	83.6	8.97129	82.8292	89.0812	7.54817		90.5328	83.6	8.29282	82.8292	89.6835	8.2753		91.192	83.6	9.08134	82.8292	90.3216	9.04568		90.829	83.6	8.64713	82.8292	88.8304	7.24536		91.371	83.6	9.29545	82.8292	89.3321	7.85097
2021	8		79.7	61.3	35.8	83.9838	79.7	5.37491	85.3708	92.9977	8.93381	81.9	79.7	2.76035	85.3708	92.0583	7.83347		83.7386	79.7	5.06725	85.3708	92.6419	8.51704		84.229	79.7	5.68256	85.3708	93.3535	9.35058		81.721	79.7	2.53576	85.3708	91.7778	7.50481		82.079	79.7	2.98494	85.3708	92.3389	8.16214
2021	9		88.2	116.3	74.4	101.914	88.2	15.5485	88.4833	96.5022	9.06257	101.2	88.2	14.7392	88.4833	95.5083	7.93935		101.449	88.2	15.0211	88.4833	96.1034	8.61187		102.379	88.2	16.076	88.4833	96.901	9.51328		100.828	88.2	14.3175	88.4833	95.1933	7.58325		101.572	88.2	15.161	88.4833	95.8234	8.29544
2021	10		88.3	91.7	56.3	93.8942	88.3	6.33545	92.4792	99.9388	8.06627	92.15	88.3	4.36014	92.4792	98.7979	6.83262		93.5274	88.3	5.92005	92.4792	99.4978	7.58944		94.261	88.3	6.75085	92.4792	100.38	8.5431		91.8685	88.3	4.04134	92.4792	98.4499	6.45634		92.4315	88.3	4.67894	92.4792	99.1459	7.2089
2021	11		84.4	73.4	49.3	87.9284	84.4	4.18057	97.2708	103.756	6.66682	88.65	84.4	5.03555	97.2708	102.315	5.18526		87.6348	84.4	3.8327	97.2708	103.268	6.16533		88.222	84.4	4.52844	97.2708	104.243	7.1683		88.4035	84.4	4.74348	97.2708	101.931	4.79137		88.8965	84.4	5.32761	97.2708	102.698	5.57916
2021	12		99.8	153.7	96.9	114.106	99.8	14.3349	101.342	107.257	5.8375	112.45	99.8	12.6754	101.342	105.613	4.21429		113.491	99.8	13.7188	101.342	106.727	5.31376		114.721	99.8	14.9509	101.342	107.788	6.36124		111.966	99.8	12.1899	101.342	105.196	3.80368		112.934	99.8	13.1608	101.342	106.029	4.62491
2022	1		100.5	130.6	81.9	106.576	100.5	6.04537	104.837	110.281	5.19245	104.95	100.5	4.42786	104.837	108.519	3.51139		106.053	100.5	5.52557	104.837	109.713	4.65078		107.098	100.5	6.56517	104.837	110.849	5.73411		104.541	100.5	4.0204	104.837	108.074	3.08674		105.359	100.5	4.83532	104.837	108.964	3.93603
2022	2		106.5	157.7	97	115.41	106.5	8.36638	108.308	113.7	4.97813	112.5	106.5	5.6338	108.308	111.881	3.29884		114.779	106.5	7.77408	108.308	113.09	4.41509		116.041	106.5	8.95869	108.308	114.31	5.54116		112.015	106.5	5.1784	108.308	111.402	2.85676		112.985	106.5	6.0892	108.308	112.36	3.74092
2022	3		115.8	186.7	117.2	124.864	115.8	7.82746	111.879	116.692	4.30223	122.6	115.8	5.87219	111.879	114.885	2.68705		124.117	115.8	7.18256	111.879	116.046	3.72435		125.611	115.8	8.47237	111.879	117.339	4.88012		122.014	115.8	5.36615	111.879	114.377	2.23223		123.186	115.8	6.37824	111.879	115.394	3.14188
2022	4		131.7	184.5	113.9	124.147	131.7	-5.735	115.742	119.462	3.21444	120.95	131.7	-8.16249	115.742	117.702	1.69379		123.409	131.7	-6.29537	115.742	118.782	2.62647		124.885	131.7	-5.17464	115.742	120.143	3.8024		120.381	131.7	-8.59491	115.742	117.165	1.2298		121.519	131.7	-7.73007	115.742	118.239	2.15777
2022	5		136.8	217.9	134.8	135.035	136.8	-1.28991	119.104	122.35	2.72514	131.4	136.8	-3.94737	119.104	120.521	1.18944		134.164	136.8	-1.92705	119.104	121.634	2.12403		135.907	136.8	-0.652778	119.104	123.066	3.32626		130.726	136.8	-4.44006	119.104	119.956	0.714885		132.074	136.8	-3.45468	119.104	121.086	1.66398
2022	6		119.8	184.7	117.6	124.212	119.8	3.68297	122.433	125.213	2.27059	122.8	119.8	2.50417	122.433	123.256	0.672134		123.473	119.8	3.06628	122.433	124.462	1.65713		124.951	119.8	4.29967	122.433	125.964	2.88405		122.212	119.8	2.01336	122.433	122.664	0.188147		123.388	119.8	2.99499	122.433	123.849	1.15612
2022	7		129.5	207.8	132.5	131.743	129.5	1.73189	127.421	129.417	1.56686	130.25	129.5	0.579151	127.421	127.413	-0.00654001		130.912	129.5	1.09004	127.421	128.615	0.936922		132.574	129.5	2.37375	127.421	130.22	2.19679		129.588	129.5	0.0675676	127.421	126.778	-0.504202		130.912	129.5	1.09073	127.421	128.047	0.491122
2022	8		117.1	187.6	118.9	125.158	117.1	6.88096	132.954	133.996	0.78381	123.45	117.1	5.42272	132.954	132.065	-0.66909		124.407	117.1	6.24014	132.954	133.137	0.137836		125.908	117.1	7.52178	132.954	134.855	1.42978		122.856	117.1	4.91503	132.954	131.384	-1.18103		124.044	117.1	5.9304	132.954	132.745	-0.15715
2022	9		136.5	210.3	135.5	132.558	136.5	-2.88806	136.975	136.813	-0.117935	131.75	136.5	-3.47985	136.975	135.148	-1.33388		131.717	136.5	-3.50432	136.975	135.92	-0.770183		133.399	136.5	-2.27179	136.975	137.707	0.534313		131.072	136.5	-3.97619	136.975	134.436	-1.8533		132.428	136.5	-2.98352	136.975	135.859	-0.814458
2022	10		132.7	201.6	130.4	129.722	132.7	-2.24446	139.246	139.079	-0.119698	129.2	132.7	-2.63753	139.246	137.575	-1.19992		128.915	132.7	-2.85215	139.246	138.158	-0.781274		130.528	132.7	-1.63677	139.246	140	0.541877		128.548	132.7	-3.12886	139.246	136.839	-1.7283		129.852	132.7	-2.14619	139.246	138.311	-0.671534
2022	11		120.7	176.1	110.5	121.409	120.7	0.587075	140.792	141.406	0.43633	119.25	120.7	-1.20133	140.792	140.142	-0.461675		120.704	120.7	0.0034797					122.113	120.7	1.17067					118.697	120.7	-1.65907					119.803	120.7	-0.743579
2022	12		143.4	261.8	167	149.347	143.4	4.147				147.5	143.4	2.85914					148.3	143.4	3.41674					150.394	143.4	4.87727					146.665	143.4	2.27685					148.335	143.4	3.44142
2023	1		176.6	332	211.3	172.232	176.6	-2.47339				169.65	176.6	-3.93545					170.904	176.6	-3.22537					173.56	176.6	-1.7214					168.594	176.6	-4.53369					170.707	176.6	-3.3372
2023	2		163.2	293.4	190.9	159.648	163.2	-2.17623				159.45	163.2	-2.29779					158.475	163.2	-2.89534					160.822	163.2	-1.45711					158.495	163.2	-2.88266					160.404	163.2	-1.71293
2023	3		155.6	258.4	171.3	148.238	155.6	-4.73111				149.65	155.6	-3.82391					147.205	155.6	-5.39537					149.272	155.6	-4.06684					148.793	155.6	-4.37436					150.507	155.6	-3.27346
2023	4		146.4	279.6	176.3	155.15	146.4	5.9765				152.15	146.4	3.9276					154.031	146.4	5.21257					156.268	146.4	6.74044					151.269	146.4	3.32548					153.031	146.4	4.52971
2023	5		159.2	294.1	195.6	159.877	159.2	0.425				161.8	159.2	1.63317					158.7	159.2	-0.313945					161.053	159.2	1.16394					160.822	159.2	1.01884					162.778	159.2	2.24749
2023	6		166.8				166.8						166.8							166.8							166.8							166.8							166.8
2023	7
2023	8										0.0287028						0.186623							-0.588133							0.645538							-0.317677							0.690923
2023	9
2023	10
2023	11
2023	12
								% diff						% diff							% diff							% diff							% diff							% diff
								above						above							above							above							above							above
								flux 100						flux 100							flux 100							flux 100							flux 100							flux 100
								-0.4						-0.4							-0.4							-0.4							-0.4							-0.4

## Sheet: SMOOTHED DIFF SUNSPOTS
			ADJUSTED	2K	FITTED	%F/E	SMOOTHED	SMOOTHED	%	1K	FITTED	%L/K	SMOOTHED	SMOOTHED	%		2K	FITTED	%F/E	SMOOTHED	SMOOTHED	%		2K	FITTED	%F/E	SMOOTHED	SMOOTHED	%		1K	FITTED	%L/K	SMOOTHED	SMOOTHED	%		1K	FITTED	%L/K	SMOOTHED	SMOOTHED	%
			FLUX		2K	Difference	2K	FITTED	Difference		1K	Difference	1K	FITTED	Difference			2K	Difference	2K	FITTED	Difference			2K	Difference	2K	FITTED	Difference			1K	Difference	1K	FITTED	Difference			1K	Difference	1K	FITTED	Difference
			STAR		Factor	Fitted/		2K	SMOOTHED		Factor	Fitted/		1K	SMOOTHED			Factor	Fitted/		2K	SMOOTHED			Factor	Fitted/		2K	SMOOTHED			Factor	Fitted/		1K	SMOOTHED			Factor	Fitted/		1K	SMOOTHED
					3.0675	2K		FROM	FITTED		2	1K		FROM	FITTED			3.1056	2K		FROM	FITTED			3.0303	2K		FROM	FITTED			2.02	1K		FROM	FITTED			1.98	1K		FROM	FITTED
2012	1	2012	128.1	152	196.627	29.3597		FLUX	2K	100.2	128.2	27.9441		FLUX	1K		152	199.069	30.9664		FLUX	2K		152	194.242	27.7909		FLUX	2K		100.2	129.482	29.2236		FLUX	1K		100.2	126.918	26.6647		FLUX	1K
2012	2		104	95.2	122.7	28.8866			VS	61.8	80	29.4498			VS		95.2	124.224	30.4874			VS		95.2	121.212	27.3235			VS		61.8	80.8	30.7443			VS		61.8	79.2	28.1553			VS
2012	3		113.5	146.3	151.841	3.78759			SMOOTHED	96.6	99	2.48447			SMOOTHED		146.3	153.727	5.07669			SMOOTHED		146.3	150	2.52895			SMOOTHED		96.6	99.99	3.50932			SMOOTHED		96.6	98.01	1.45963			SMOOTHED
2012	4		113.9	162.4	153.068	-5.74615			2K	104.6	99.8	-4.58891			1K		162.4	154.969	-4.57547			2K		162.4	151.212	-6.88918			2K		104.6	100.798	-3.6348			1K		104.6	98.802	-5.54302			1K
2012	5		124	204.7	184.05	-10.0879				136.3	120	-11.9589					204.7	186.336	-8.97118					204.7	181.818	-11.1783					136.3	121.2	-11.0785					136.3	118.8	-12.8393
2012	6		123.4	180.3	182.21	1.05907				120.6	118.8	-1.49254					180.3	184.473	2.31428					180.3	180	-0.166489					120.6	119.988	-0.507463					120.6	117.612	-2.47761
2012	7		138.5	197.3	228.529	15.8281	159.542	169.53	6.26096	126.9	149	17.4153	104.3	110.533	5.97635		197.3	231.367	17.2667	159.542	171.636	7.58077		197.3	225.757	14.4234	159.542	167.475	4.97231		126.9	150.49	18.5894	104.3	111.639	7.03611		126.9	147.51	16.2411	104.3	109.428	4.91659
2012	8		118.3	151.2	166.565	10.1622	161.737	168.61	4.24932	106.6	108.6	1.87617	105.704	109.933	4.00095		151.2	168.634	11.5305	161.737	170.704	5.54416		151.2	164.545	8.82625	161.737	166.565	2.98508		106.6	109.686	2.89493	105.704	111.033	5.04096		106.6	107.514	0.857411	105.704	108.834	2.96094
2012	9		124.3	175.7	184.97	5.27618	163.417	167.907	2.74795	114.1	120.6	5.69676	106.129	109.475	3.1526		175.7	187.268	6.58377	163.417	169.993	4.02414		175.7	182.727	3.99948	163.417	165.871	1.50192		114.1	121.806	6.75372	106.129	110.57	4.18413		114.1	119.394	4.63979	106.129	108.38	2.12108
2012	10		122.4	148.3	179.142	20.797	165.954	169.019	1.84695	92.4	116.8	26.4069	107.033	110.2	2.95858		148.3	181.367	22.2974	165.954	171.119	3.11194		148.3	176.97	19.3321	165.954	166.97	0.611834		92.4	117.968	27.671	107.033	111.302	3.98817		92.4	115.632	25.1429	107.033	109.098	1.92899
2012	11		118.3	167.5	166.565	-0.55806	168.754	171.869	1.84606	106.5	108.6	1.97183	108.188	112.058	3.57789		167.5	168.634	0.677063	168.754	174.004	3.11104		167.5	164.545	-1.76401	168.754	169.785	0.610958		106.5	109.686	2.99155	108.188	113.179	4.61367		106.5	107.514	0.952113	108.188	110.938	2.54211
2012	12		105	121.1	125.767	3.85425	168.833	171.946	1.84373	75.3	82	8.89774	107.062	112.108	4.71298		121.1	127.33	5.14418	168.833	174.082	3.10868		121.1	124.242	2.5948	168.833	169.861	0.608652		75.3	82.82	9.98672	107.062	113.229	5.76011		75.3	81.18	7.80876	107.062	110.987	3.66585
2013	1		123.1	177	181.289	2.42331	167.867	168.252	0.229771	119.6	118.2	-1.17057	104.779	109.7	4.69639		177	183.541	3.69546	167.867	170.342	1.47468		177	179.091	1.1812	167.867	166.212	-0.98573		119.6	119.382	-0.182274	104.779	110.797	5.74335		119.6	117.018	-2.15886	104.779	108.603	3.64942
2013	2		101.8	122.9	115.951	-5.65378	168.912	165.798	-1.84363	76.1	75.6	-0.65703	103.737	108.1	4.20533		122.9	117.392	-4.48195	168.912	167.858	-0.624477		122.9	114.545	-6.79793	168.912	163.788	-3.03399		76.1	76.356	0.336399	103.737	109.181	5.24738		76.1	74.844	-1.65046	103.737	107.019	3.16327
2013	3		110.2	158.9	141.719	-10.8128	168.292	163.165	-3.04604	92.5	92.4	-0.108108	101.9	106.383	4.39974		158.9	143.479	-9.70502	168.292	165.192	-1.84182		158.9	140	-11.8944	168.292	161.187	-4.22181		92.5	93.324	0.890811	101.9	107.447	5.44374		92.5	91.476	-1.10703	101.9	105.319	3.35574
2013	4		125.9	210.7	189.878	-9.88218	169.042	161.657	-4.3684	130.4	123.8	-5.06135	102.042	105.4	3.29114		210.7	192.237	-8.76287	169.042	163.665	-3.1806		210.7	187.576	-10.975	169.042	159.697	-5.52814		130.4	125.038	-4.11196	102.042	106.454	4.32405		130.4	122.562	-6.01074	102.042	104.346	2.25823
2013	5		134.3	223.6	215.645	-3.55758	174.604	166.207	-4.80904	138.2	140.6	1.73661	105.725	108.367	2.49862		223.6	218.324	-2.35971	174.604	168.272	-3.62672		223.6	213.03	-4.72715	174.604	164.192	-5.96344		138.2	142.006	2.75398	105.725	109.45	3.52361		138.2	139.194	0.719247	105.725	107.283	1.47363
2013	6		113.7	163.3	152.455	-6.6413	183.733	174.502	-5.02409	91.7	99.4	8.39695	111.338	113.775	2.18929		163.3	154.348	-5.48174	183.733	176.67	-3.84444		163.3	150.606	-7.77348	183.733	172.386	-6.17588		91.7	100.394	9.48092	111.338	114.913	3.21118		91.7	98.406	7.31298	111.338	112.637	1.1674
2013	7		119.3	191.1	169.633	-11.2335	193.812	183.117	-5.51849	101	110.6	9.50495	118.079	119.392	1.11154		191.1	171.74	-10.131	193.812	185.391	-4.34498		191.1	167.576	-12.31	193.812	180.896	-6.66428		101	111.706	10.6	118.079	120.586	2.12266		101	109.494	8.4099	118.079	118.198	0.100427
2013	8		118.3	182.5	166.565	-8.73137	206.225	195.106	-5.39179	107.5	108.6	1.02326	126.938	127.208	0.21336		182.5	168.634	-7.59776	206.225	197.529	-4.21671		182.5	164.545	-9.8382	206.225	192.74	-6.53912		107.5	109.686	2.03349	126.938	128.48	1.21549		107.5	107.514	0.0130233	126.938	125.936	-0.788774
2013	9		103.7	129.5	121.78	-5.96158	220.292	208.245	-5.46855	69.1	79.4	14.9059	137.704	135.775	-1.40095		129.5	123.292	-4.79358	220.292	210.831	-4.29442		129.5	120.303	-7.102	220.292	205.719	-6.61495		69.1	80.194	16.055	137.704	137.133	-0.41496		69.1	78.606	13.7569	137.704	134.417	-2.38694
2013	10		131.2	212.5	206.136	-2.99482	227.571	215.556	-5.2797	140.8	134.4	-4.54545	144.329	140.542	-2.62421		212.5	208.696	-1.78997	227.571	218.233	-4.10322		212.5	203.636	-4.17122	227.571	212.942	-6.42838		140.8	135.744	-3.59091	144.329	141.947	-1.65045		140.8	133.056	-5.5	144.329	139.136	-3.59797
2013	11		145.1	236.8	248.774	5.05669	229.975	217.792	-5.29731	146.5	162.2	10.7167	147.546	142	-3.75872		236.8	251.864	6.36155	229.975	220.498	-4.12106		236.8	245.757	3.78266	229.975	215.151	-6.44579		146.5	163.822	11.8239	147.546	143.42	-2.79631		146.5	160.578	9.60956	147.546	140.58	-4.72113
2013	12		143.1	270.9	242.639	-10.4322	232.017	219.16	-5.54123	170	158.2	-6.94118	151.058	142.892	-5.4063		270.9	245.653	-9.31969	232.017	221.882	-4.368		270.9	239.697	-11.5184	232.017	216.502	-6.68674		170	159.782	-6.01059	151.058	144.321	-4.46036		170	156.618	-7.87176	151.058	141.463	-6.35224
2014	1	2014	152.4	269.1	271.167	0.768116	234.975	223.582	-4.84843	186.7	176.8	-5.30262	155.571	145.775	-6.2967		269.1	274.535	2.01971	234.975	226.359	-3.66659		269.1	267.879	-0.453913	234.975	220.871	-6.00234		186.7	178.568	-4.35565	155.571	147.233	-5.35967		186.7	175.032	-6.2496	155.571	144.317	-7.23374
2014	2		166.3	328.7	313.805	-4.53141	237.375	227.685	-4.08207	221.6	204.6	-7.67148	159.075	148.45	-6.67924		328.7	317.703	-3.34564	237.375	230.513	-2.89072		328.7	310	-5.68917	237.375	224.924	-5.24528		221.6	206.646	-6.74819	159.075	149.935	-5.74603		221.6	202.554	-8.59477	159.075	146.965	-7.61245
2014	3		148.5	290.7	259.204	-10.8346	243.25	234.587	-3.56133	205.4	169	-17.7215	164.633	152.95	-7.09658		290.7	262.423	-9.72714	243.25	237.501	-2.36351		290.7	256.06	-11.9159	243.25	231.742	-4.73086		205.4	170.69	-16.8987	164.633	154.48	-6.16754		205.4	167.31	-18.5443	164.633	151.421	-8.02561
2014	4		144.8	253.6	247.854	-2.26577	248.292	243.035	-2.11694	176.5	161.6	-8.44193	169.25	158.458	-6.37617		253.6	250.932	-1.05186	248.292	246.054	-0.901185		253.6	244.848	-3.45101	248.292	240.088	-3.30399		176.5	163.216	-7.52635	169.25	160.043	-5.43993		176.5	159.984	-9.35751	169.25	156.874	-7.31241
2014	5		132.9	238.4	211.351	-11.3462	248.796	246.614	-0.876869	169.3	137.8	-18.606	170.287	160.792	-5.57635		238.4	213.976	-10.245	248.796	249.677	0.354293		238.4	208.788	-12.4213	248.796	243.623	-2.07895		169.3	139.178	-17.7921	170.287	162.4	-4.63212		169.3	136.422	-19.42	170.287	159.184	-6.52059
2014	6		125.8	197.5	189.571	-4.01443	248.013	248.787	0.312295	144.9	123.6	-14.6998	170.729	162.208	-4.99085		197.5	191.926	-2.82224	248.013	251.877	1.55823		197.5	187.273	-5.17846	248.013	245.77	-0.904206		144.9	124.836	-13.8468	170.729	163.83	-4.04076		144.9	122.364	-15.5528	170.729	160.586	-5.94094
2014	7		141.8	227.9	238.652	4.71764	244.067	248.225	1.70363	156.1	155.6	-0.320307	168.479	161.842	-3.93966		227.9	241.616	6.01829	244.067	251.308	2.96684		227.9	235.757	3.44771	244.067	245.214	0.470255		156.1	157.156	0.676489	168.479	163.46	-2.97905		156.1	154.044	-1.3171	168.479	160.223	-4.90026
2014	8		127.9	203.3	196.013	-3.58424	234.85	241.144	2.67994	136.5	127.8	-6.37363	162.171	157.225	-3.04977		203.3	198.448	-2.3867	234.85	244.139	3.95528		203.3	193.636	-4.75348	234.85	238.219	1.43473		136.5	129.078	-5.43736	162.171	158.797	-2.08027		136.5	126.522	-7.30989	162.171	155.653	-4.01927
2014	9		148.1	249.7	257.977	3.31468	223.187	232.938	4.36887	173.5	168.2	-3.05476	153.971	151.875	-1.36119		249.7	261.181	4.5979	223.187	235.832	5.66519		249.7	254.848	2.06177	223.187	230.113	3.10318		173.5	169.882	-2.0853	153.971	153.394	-0.3748		173.5	166.518	-4.02421	153.971	150.356	-2.34758
2014	10		152.9	213.3	272.701	27.8485	216.304	227.954	5.38567	147.2	177.8	20.788	148.704	148.625	-0.0532377		213.3	276.088	29.4364	216.304	230.785	6.69462		213.3	269.394	26.298	216.304	225.189	4.10764		147.2	179.578	21.9959	148.704	150.111	0.94623		147.2	176.022	19.5802	148.704	147.139	-1.05271
2014	11		151.4	248.1	268.1	8.06106	212.842	224.707	5.5748	165	174.8	5.93939	145.829	146.508	0.465728		248.1	271.429	9.40324	212.842	227.498	6.88609		248.1	264.848	6.75059	212.842	221.982	4.29448		165	176.548	6.99879	145.829	147.973	1.47038		165	173.052	4.88	145.829	145.043	-0.53893
2014	12		153.8	240.8	275.462	14.3943	209.708	223.429	6.54275	162.1	179.6	10.7958	142.7	145.675	2.08479		240.8	278.883	15.8151	209.708	226.204	7.86607		240.8	272.121	13.007	209.708	220.719	5.25069		162.1	181.396	11.9038	142.7	147.132	3.10564		162.1	177.804	9.68785	142.7	144.218	1.06395
2015	1		137.3	204.5	224.848	9.95	204.967	219.505	7.09311	140.6	146.6	4.26743	138.65	143.117	3.22154		204.5	227.64	11.3156	204.967	222.232	8.42327		204.5	222.121	8.61662	204.967	216.843	5.79438		140.6	148.066	5.3101	138.65	144.548	4.25376		140.6	145.134	3.22475	138.65	141.686	2.18933
2015	2		126	172.1	190.185	10.5084	198.788	213	7.14936	116.3	124	6.62081	134.279	138.875	3.4226		172.1	192.547	11.881	198.788	215.645	8.48021		172.1	187.879	9.16827	198.788	210.416	5.84994		116.3	125.24	7.68702	134.279	140.264	4.45682		116.3	122.76	5.5546	134.279	137.486	2.38837
2015	3		124.6	167.4	185.89	11.0457	191.925	204.653	6.63195	113.9	121.2	6.40913	129.1	133.433	3.35657		167.4	188.199	12.4249	191.925	207.195	7.95638		167.4	183.636	9.69903	191.925	202.172	5.33881		113.9	122.412	7.47322	129.1	134.768	4.39014		113.9	119.988	5.34504	129.1	132.099	2.32301
2015	4		129.7	211.7	201.535	-4.80172	184.587	192.511	4.29265	141.6	131.4	-7.20339	123.354	125.517	1.75308		211.7	204.038	-3.61931	184.587	194.902	5.58802		211.7	199.091	-5.95621	184.587	190.177	3.02787		141.6	132.714	-6.27542	123.354	126.772	2.77061		141.6	130.086	-8.13136	123.354	124.261	0.735551
2015	5		122.6	197.2	179.755	-8.8461	177.408	180.484	1.73368	135.2	117.2	-13.3136	117.963	117.675	-0.243722		197.2	181.988	-7.71391	177.408	182.726	2.99727		197.2	177.576	-9.95153	177.408	178.295	0.499944		135.2	118.372	-12.4467	117.963	118.852	0.753841		135.2	116.028	-14.1805	117.963	116.498	-1.24128
2015	6		126.1	163.5	190.492	16.5087	168.867	169.134	0.158477	103.9	124.2	19.538	111.45	110.275	-1.05428		163.5	192.858	17.9558	168.867	171.235	1.4025		163.5	188.182	15.0958	168.867	167.083	-1.05616		103.9	125.442	20.7334	111.45	111.378	-0.0648273		103.9	122.958	18.3426	111.45	109.172	-2.04374
2015	7		110.8	148.1	143.559	-3.06617	161.888	158.718	-1.95811	99.9	93.6	-6.30631	105.337	103.483	-1.76022		148.1	145.342	-1.8622	161.888	160.689	-0.740378		148.1	141.818	-4.2417	161.888	156.793	-3.14708		99.9	94.536	-5.36937	105.337	104.518	-0.777817		99.9	92.664	-7.24324	105.337	102.448	-2.74261
2015	8		108	134.8	134.97	0.126113	159.733	150.768	-5.61292	87.8	88	0.22779	102.2	98.3	-3.81605		134.8	136.646	1.36973	159.733	152.64	-4.44058		134.8	133.333	-1.08813	159.733	148.939	-6.75757		87.8	88.88	1.23007	102.2	99.283	-2.85421		87.8	87.12	-0.774487	102.2	97.317	-4.77789
2015	9		102.7	153.5	118.712	-22.663	157.192	143.227	-8.88405	97.9	77.4	-20.9397	99.3625	93.3833	-6.01753		153.5	120.187	-21.7025	157.192	145.006	-7.75234		153.5	117.273	-23.6009	157.192	141.49	-9.98902		97.9	78.174	-20.1491	99.3625	94.3172	-5.0777		97.9	76.626	-21.7303	99.3625	92.4495	-6.95735
2015	10		103.3	133.4	120.553	-9.63062	149.075	134.318	-9.89894	84.9	78.6	-7.42049	93.7625	87.575	-6.59912		133.4	122.05	-8.50819	149.075	135.986	-8.77984		133.4	119.091	-10.7265	149.075	132.689	-10.9916		84.9	79.386	-6.4947	93.7625	88.4507	-5.66511		84.9	77.814	-8.34629	93.7625	86.6992	-7.53313
2015	11		106.9	155.7	131.596	-15.4812	139.108	126.266	-9.23192	97.9	85.8	-12.3596	87.4167	82.325	-5.82459		155.7	133.23	-14.4314	139.108	127.834	-8.10453		155.7	130	-16.5062	139.108	124.735	-10.3327		97.9	86.658	-11.4831	87.4167	83.1482	-4.88284		97.9	84.942	-13.236	87.4167	81.5017	-6.76635
2015	12		109.5	128.2	139.571	8.86993	129.45	117.46	-9.2625	72.9	91	24.8285	81.525	76.5833	-6.06154		128.2	141.305	10.2222	129.45	118.919	-8.1355		128.2	137.879	7.54965	129.45	116.035	-10.3629		72.9	91.91	26.0768	81.525	77.3492	-5.12215		72.9	90.09	23.5802	81.525	75.8175	-7.00092
2016	1	2016	100.1	149.6	110.737	-25.9781	120.892	109.344	-9.55241	83.1	72.2	-13.1167	76.3208	71.2917	-6.58951		149.6	112.112	-25.0587	120.892	110.702	-8.42901		149.6	109.394	-26.8758	120.892	108.018	-10.6493		83.1	72.922	-12.2479	76.3208	72.0046	-5.6554		83.1	71.478	-13.9856	76.3208	70.5787	-7.52361
2016	2		101	175.3	113.498	-35.2553	115.121	103.873	-9.77027	98.5	74	-24.8731	73.0042	67.725	-7.23132		175.3	114.907	-34.4511	115.121	105.163	-8.64957		175.3	112.121	-36.0404	115.121	102.614	-10.8645		98.5	74.74	-24.1218	73.0042	68.4022	-6.30364		98.5	73.26	-25.6244	73.0042	67.0478	-8.15901
2016	3		90.6	103.2	81.5955	-20.9346	109.404	99.4126	-9.13275	63.6	53.2	-16.3522	70.0083	64.8167	-7.41578		103.2	82.609	-19.9526	109.404	100.647	-8.00413		103.2	80.606	-21.8934	109.404	98.207	-10.2347		63.6	53.732	-15.5157	70.0083	65.4648	-6.48994		63.6	52.668	-17.1887	70.0083	64.1685	-8.34163
2016	4		94	81.1	92.025	13.471	102.792	95.3609	-7.22895	57.5	60	4.34783	66.45	62.175	-6.43341		81.1	93.168	14.8804	102.792	96.5453	-6.07669		81.1	90.909	12.0949	102.792	94.2045	-8.354		57.5	60.6	5.3913	66.45	62.7968	-5.49774		57.5	59.4	3.30435	66.45	61.5533	-7.36907
2016	5		95.3	88.6	96.0127	8.36653	94.9333	89.2642	-5.97165	67	62.6	-6.56716	62.075	58.2	-6.24245		88.6	97.2053	9.71251	94.9333	90.373	-4.80376		88.6	94.8484	7.05236	94.9333	88.1817	-7.11194		67	63.226	-5.63284	62.075	58.782	-5.30487		67	61.974	-7.50149	62.075	57.618	-7.18002
2016	6		84.5	40.3	62.8837	56.0391	86.3583	80.7392	-6.50682	30.7	41	33.5505	57.475	52.6417	-8.40945		40.3	63.6648	57.9772	86.3583	81.742	-5.34558		40.3	62.1212	54.1468	86.3583	79.76	-7.64062		30.7	41.41	34.886	57.475	53.1681	-7.49355		30.7	40.59	32.215	57.475	52.1153	-9.32536
2016	7		88.9	65.9	76.3808	15.904	78.1292	72.8276	-6.78569	48.2	49.8	3.3195	53.5333	47.4833	-11.3014		65.9	77.3294	17.3436	78.1292	73.7321	-5.62792		65.9	75.4545	14.4984	78.1292	71.9444	-7.91611		48.2	50.298	4.3527	53.5333	47.9582	-10.4144		48.2	49.302	2.28631	53.5333	47.0085	-12.1884
2016	8		87.1	78.5	70.8592	-9.73344	68.1	66.2836	-2.66731	59.9	46.2	-22.8715	48.6458	43.2167	-11.1606		78.5	71.7394	-8.61228	68.1	67.1068	-1.45838		78.5	69.9999	-10.8281	68.1	65.4797	-3.84768		59.9	46.662	-22.1002	48.6458	43.6488	-10.2722		59.9	45.738	-23.6427	48.6458	42.7845	-12.049
2016	9		88.7	72.6	75.7673	4.3626	59.3625	60.826	2.46531	53.9	49.4	-8.34879	44.0125	39.6583	-9.89302		72.6	76.7083	5.65884	59.3625	61.5815	3.73798		72.6	74.8484	3.09698	59.3625	60.0883	1.2227		53.9	49.894	-7.43228	44.0125	40.0549	-8.99195		53.9	48.906	-9.26531	44.0125	39.2617	-10.7941
2016	10		85.6	55.6	66.258	19.1691	55.2667	57.0044	3.14422	43.5	43.2	-0.689655	41.2917	37.1667	-9.98991		55.6	67.081	20.6492	55.2667	57.7124	4.42533		55.6	65.4545	17.7239	55.2667	56.3131	1.89338		43.5	43.632	0.303448	41.2917	37.5383	-9.08981		43.5	42.768	-1.68276	41.2917	36.795	-10.89
2016	11		76.9	44.9	39.5708	-11.8692	51.9958	52.7482	1.44701	34.3	25.8	-24.7813	38.5167	34.3917	-10.7096		44.9	40.0622	-10.7745	51.9958	53.4034	2.70704		44.9	39.0909	-12.9379	51.9958	52.1085	0.216749		34.3	26.058	-24.0292	38.5167	34.7356	-9.81675		34.3	25.542	-25.5335	38.5167	34.0478	-11.6026
2016	12		72.8	33.2	26.994	-18.6928	49.9792	49.2334	-1.49221	26.1	17.6	-32.567	36.6208	32.1	-12.345		33.2	27.3293	-17.6829	49.9792	49.8449	-0.268685		33.2	26.6666	-19.6788	49.9792	48.6363	-2.68682		26.1	17.776	-31.8927	36.6208	32.421	-11.4684		26.1	17.424	-33.2414	36.6208	31.779	-13.2215
2017	1		74.9	47.1	33.4358	-29.0111	48.9125	47.1373	-3.62944	35.3	21.8	-38.2436	35.3958	30.7333	-13.1725		47.1	33.851	-28.1294	48.9125	47.7227	-2.43247		47.1	33.0303	-29.872	48.9125	46.5656	-4.79814		35.3	22.018	-37.6261	35.3958	31.0407	-12.3042		35.3	21.582	-38.8612	35.3958	30.426	-14.0407
2017	2		75	37.1	33.7425	-9.04987	46.8333	45.0539	-3.79949	29	22	-24.1379	33.3042	29.375	-11.7978		37.1	34.1616	-7.92022	46.8333	45.6135	-2.60463		37.1	33.3333	-10.1528	46.8333	44.5075	-4.96613		29	22.22	-23.3793	33.3042	29.6687	-10.9158		29	21.78	-24.8966	33.3042	29.0813	-12.6798
2017	3		73.9	31.7	30.3683	-4.2011	46.5792	44.581	-4.28983	21.9	19.8	-9.58904	32.5042	29.0667	-10.5756		31.7	30.7454	-3.01123	46.5792	45.1347	-3.10106		31.7	30	-5.36287	46.5792	44.0404	-5.45052		21.9	19.998	-8.68493	32.5042	29.3573	-9.68132		21.9	19.602	-10.4932	32.5042	28.776	-11.4698
2017	4		80.8	54.3	51.534	-5.09392	46.0708	43.763	-5.00932	33.9	33.6	-0.884956	31.6125	28.5333	-9.74035		54.3	52.1741	-3.91514	46.0708	44.3066	-3.82948		54.3	50.909	-6.24486	46.0708	43.2323	-6.16128		33.9	33.936	0.106195	31.6125	28.8187	-8.83775		33.9	33.264	-1.87611	31.6125	28.248	-10.6429
2017	5		75.2	36.9	34.356	-6.89431	43.7833	41.6797	-4.80474	24	22.4	-6.66667	29.6167	27.175	-8.24423		36.9	34.7827	-5.73789	43.7833	42.1973	-3.62237		36.9	33.9394	-8.02341	43.7833	41.1742	-5.95919		24	22.624	-5.73333	29.6167	27.4468	-7.32667		24	22.176	-7.6	29.6167	26.9032	-9.16179
2017	6		77.1	43.6	40.1842	-7.83429	41.9125	40.4271	-3.54407	28.2	26.2	-7.0922	28.0667	26.3583	-6.0867		43.6	40.6834	-6.68954	41.9125	40.9292	-2.34603		43.6	39.6969	-8.952	41.9125	39.9368	-4.7138		28.2	26.462	-6.16312	28.0667	26.6219	-5.14757		28.2	25.938	-8.02128	28.0667	26.0948	-7.02583
2017	7		79.9	37	48.7733	31.8196	39.9333	39.0595	-2.18823	21.3	31.8	49.2958	26.3792	25.4667	-3.45917		37	49.379	33.4569	39.9333	39.5446	-0.973356		37	48.1818	30.221	39.9333	38.5858	-3.37441		21.3	32.118	50.7887	26.3792	25.7213	-2.49376		21.3	31.482	47.8028	26.3792	25.212	-4.42458
2017	8		79.8	57.5	48.4665	-15.7104	38.1292	37.5257	-1.58256	36.6	31.6	-13.6612	24.6792	24.4667	-0.86105		57.5	49.0685	-14.6635	38.1292	37.9918	-0.360162		57.5	47.8787	-16.7326	38.1292	37.0707	-2.77608		36.6	31.916	-12.7978	24.6792	24.7113	0.130339		36.6	31.284	-14.5246	24.6792	24.222	-1.85244
2017	9		92.3	87.5	86.8102	-0.788286	36.6833	36.107	-1.57102	58	56.6	-2.41379	23.3583	23.5417	0.784873		87.5	87.8885	0.443977	36.6833	36.5555	-0.348478		87.5	85.7575	-1.99144	36.6833	35.6692	-2.76468		58	57.166	-1.43793	23.3583	23.7771	1.79272		58	56.034	-3.38966	23.3583	23.3063	-0.222975
2017	10		75.6	28.5	35.583	24.8526	34.4292	33.9853	-1.28909	18	23.2	28.8889	21.7208	22.1583	2.0142		28.5	36.025	26.4034	34.4292	34.4075	-0.0630473		28.5	35.1515	23.3385	34.4292	33.5732	-2.48617		18	23.432	30.1778	21.7208	22.3799	3.03434		18	22.968	27.6	21.7208	21.9367	0.994053
2017	11		70.6	17.1	20.2455	18.3947	32.5542	32.311	-0.74696	11.9	13.2	10.9244	20.4125	21.0667	3.20474		17.1	20.497	19.8653	32.5542	32.7123	0.485816		17.1	20	16.9589	32.5542	31.9192	-1.95062		11.9	13.332	12.0336	20.4125	21.2773	4.23678		11.9	13.068	9.81513	20.4125	20.856	2.17269
2017	12		69.3	16.1	16.2577	0.979814	31.3417	31.6464	0.972215	11.3	10.6	-6.19469	19.575	20.6333	5.40656		16.1	16.4597	2.23404	31.3417	32.0394	2.22634		16.1	16.0606	-0.244783	31.3417	31.2626	-0.252289		11.3	10.706	-5.25664	19.575	20.8397	6.46062		11.3	10.494	-7.13274	19.575	20.427	4.35249
2018	1	2018	67.7	16.7	11.3498	-32.0374	29.525	30.3682	2.85605	9.6	7.4	-22.9167	18.3583	19.8	7.85293		16.7	11.4907	-31.1933	29.525	30.7454	4.13358		16.7	11.2121	-32.8616	29.525	30	1.6087		9.6	7.474	-22.1458	18.3583	19.998	8.93146		9.6	7.326	-23.6875	18.3583	19.602	6.7744
2018	2		70.2	24.2	19.0185	-21.4112	26.9792	28.2466	4.69768	13.9	12.4	-10.7914	16.5917	18.4167	10.9995		24.2	19.2547	-20.435	26.9792	28.5974	5.99808		24.2	18.7879	-22.3642	26.9792	27.904	3.428		13.9	12.524	-9.89928	16.5917	18.6008	12.1095		13.9	12.276	-11.6835	16.5917	18.2325	9.8895
2018	3		67.6	9.9	11.043	11.5455	22.3458	24.1182	7.93161	5.3	7.2	35.8491	13.3833	15.725	17.4969		9.9	11.1802	12.9309	22.3458	24.4178	9.27218		9.9	10.9091	10.1927	22.3458	23.8257	6.62271		5.3	7.272	37.2075	13.3833	15.8822	18.6719		5.3	7.128	34.4906	13.3833	15.5677	16.3219
2018	4		70.5	22	19.9387	-9.36932	18.4542	20.3094	10.0532	11.2	13	16.0714	10.8042	13.2417	22.5607		22	20.1864	-8.24364	18.4542	20.5617	11.4201		22	19.697	-10.4684	18.4542	20.0631	8.7186		11.2	13.13	17.2321	10.8042	13.3741	23.7863		11.2	12.87	14.9107	10.8042	13.1093	21.3351
2018	5		72.4	24.2	25.767	6.47521	17.6208	19.0696	8.22204	15.3	16.8	9.80392	10.2333	12.4333	21.4984		24.2	26.087	7.79769	17.6208	19.3065	9.56621		24.2	25.4545	5.18397	17.6208	18.8384	6.90961		15.3	16.968	10.902	10.2333	12.5577	22.7134		15.3	16.632	8.70588	10.2333	12.309	20.2834
2018	6		74.7	27.2	32.8223	20.67	17.3042	18.4689	6.73098	16.8	21.4	27.381	9.96667	12.0417	20.8194		27.2	33.2299	22.1688	17.3042	18.6983	8.05663		27.2	32.4242	19.2067	17.3042	18.2449	5.43664		16.8	21.614	28.6548	9.96667	12.1621	22.0276		16.8	21.186	26.1071	9.96667	11.9213	19.6112
2018	7		72.3	9.8	25.4602	159.798	17.0292	18.4689	8.45455	3.5	16.6	374.286	9.87917	12.0417	21.8895		9.8	25.7765	163.025	17.0292	18.6983	9.80161		9.8	25.1515	156.648	17.0292	18.2449	7.13931		3.5	16.766	379.029	9.87917	12.1621	23.1084		3.5	16.434	369.543	9.87917	11.9213	20.6706
2018	8		70.8	23.6	20.859	-11.6144	16.2167	18.4945	14.0461	12	13.6	13.3333	9.4375	12.0583	27.7704		23.6	21.1181	-10.5166	16.2167	18.7242	15.4626		23.6	20.606	-12.6863	16.2167	18.2702	12.663		12	13.736	14.4667	9.4375	12.1789	29.0481		12	13.464	12.2	9.4375	11.9377	26.4927
2018	9		69	10.2	15.3375	50.3676	15.8958	18.7373	17.8756	5.6	10	78.5714	9.26667	12.2167	31.8345		10.2	15.528	52.2353	15.8958	18.97	19.3397		10.2	15.1515	48.5441	15.8958	18.5101	16.4461		5.6	10.1	80.3571	9.26667	12.3388	33.1529		5.6	9.9	76.7857	9.26667	12.0945	30.5162
2018	10		69.1	12.4	15.6442	26.1633	16.0542	19.4531	21.1714	8.5	10.2	20	9.53333	12.6833	33.042		12.4	15.8386	27.7303	16.0542	19.6947	22.6764		12.4	15.4545	24.6333	16.0542	19.2172	19.702		8.5	10.302	21.2	9.53333	12.8102	34.3724		8.5	10.098	18.8	9.53333	12.5565	31.7115
2018	11		67.4	13.2	10.4295	-20.9886	15.5917	19.8109	27.0611	7.7	6.8	-11.6883	9.44583	12.9167	36.7446		13.2	10.559	-20.0073	15.5917	20.057	28.6392		13.2	10.303	-21.9468	15.5917	19.5707	25.5202		7.7	6.868	-10.8052	9.44583	13.0458	38.112		7.7	6.732	-12.5714	9.44583	12.7875	35.3772
2018	12		67.8	12.4	11.6565	-5.99597	14.8708	19.2997	29.7822	9.1	7.6	-16.4835	8.92083	12.5833	41.0556		12.4	11.8013	-4.82839	14.8708	19.5394	31.3941		12.4	11.5151	-7.13597	14.8708	19.0656	28.2083		9.1	7.676	-15.6484	8.92083	12.7092	42.4661		9.1	7.524	-17.3187	8.92083	12.4575	39.645
2019	1		69.2	13.8	15.951	15.587	14.5083	18.3539	26.5057	9.7	10.4	7.21649	8.50417	11.9667	40.7153		13.8	16.1491	17.0226	14.5083	18.5818	28.077		13.8	15.7576	14.1852	14.5083	18.1313	24.9716		9.7	10.504	8.28866	8.50417	12.0863	42.1225		9.7	10.296	6.14433	8.50417	11.847	39.3082
2019	2		68.9	7.6	15.0308	97.773	13.9458	17.702	26.9342	3.2	9.8	206.25	8.07917	11.5417	42.8571		7.6	15.2174	100.229	13.9458	17.9219	28.5108		7.6	14.8485	95.3746	13.9458	17.4874	25.3948		3.2	9.898	209.313	8.07917	11.6571	44.2857		3.2	9.702	203.188	8.07917	11.4262	41.4286
2019	3		70.8	18.8	20.859	10.9521	13.125	17.3953	32.5355	11.9	13.6	14.2857	7.55833	11.3417	50.0551		18.8	21.1181	12.3302	13.125	17.6113	34.1816		18.8	20.606	9.6066	13.125	17.1843	30.9282		11.9	13.736	15.4286	7.55833	11.4551	51.5557		11.9	13.464	13.1429	7.55833	11.2283	48.5546
2019	4		72.9	16.9	27.3008	61.5429	12.6833	17.0885	34.7322	11	17.8	61.8182	7.2125	11.1417	54.4772		16.9	27.6398	63.5493	12.6833	17.3008	36.4056		16.9	26.9697	59.5838	12.6833	16.8813	33.0983		11	17.978	63.4364	7.2125	11.2531	56.022		11	17.622	60.2	7.2125	11.0303	52.9324
2019	5		72.8	18.2	26.994	48.3187	12.4042	16.9863	36.9401	13.4	17.6	31.3433	6.88333	11.075	60.8959		18.2	27.3293	50.1609	12.4042	17.1973	38.641		18.2	26.6666	46.52	12.4042	16.7803	35.2794		13.4	17.776	32.6567	6.88333	11.1858	62.5048		13.4	17.424	30.0299	6.88333	10.9643	59.2869
2019	6		70.3	15.9	19.3252	21.5425	12.4375	17.2547	38.7312	6.1	12.6	106.557	6.68333	11.25	68.3292		15.9	19.5653	23.0521	12.4375	17.469	40.4543		15.9	19.0909	20.0685	12.4375	17.0454	37.0487		6.1	12.726	108.623	6.68333	11.3625	70.0125		6.1	12.474	104.492	6.68333	11.1375	66.6459
2019	7		69.3	12.4	16.2577	31.1109	12.825	17.4464	36.0344	4.2	10.6	152.381	6.6125	11.375	72.0227		12.4	16.4597	32.7394	12.825	17.6631	37.724		12.4	16.0606	29.5209	12.825	17.2348	34.3846		4.2	10.706	154.905	6.6125	11.4888	73.7429		4.2	10.494	149.857	6.6125	11.2613	70.3025
2019	8		68.7	7.5	14.4173	92.23	13.175	17.587	33.4877	1.1	9.4	754.545	6.70833	11.4667	70.9317		7.5	14.5963	94.6176	13.175	17.8054	35.1457		7.5	14.2424	89.8988	13.175	17.3737	31.8688		1.1	9.494	763.091	6.70833	11.5813	72.641		1.1	9.306	746	6.70833	11.352	69.2224
2019	9		68.7	6.6	14.4173	118.443	12.7792	17.472	36.7223	4	9.4	135	6.35	11.3917	79.3963		6.6	14.5963	121.156	12.7792	17.689	38.4204		6.6	14.2424	115.794	12.7792	17.2601	35.0642		4	9.494	137.35	6.35	11.5056	81.1903		4	9.306	132.65	6.35	11.2778	77.6024
2019	10		67	5.4	9.2025	70.4167	12.4375	16.9352	36.1621	1.8	6	233.333	5.83333	11.0417	89.2857		5.4	9.3168	72.5333	12.4375	17.1455	37.8533		5.4	9.0909	68.35	12.4375	16.7298	34.5108		1.8	6.06	236.667	5.83333	11.1521	91.1786		1.8	5.94	230	5.83333	10.9313	87.3929
2019	11		68.7	13.5	14.4173	6.79444	12.1583	16.2833	33.9272	6.5	9.4	44.6154	5.27083	10.6167	101.423		13.5	14.5963	8.12089	12.1583	16.4856	35.5906		13.5	14.2424	5.49933	12.1583	16.0858	32.303		6.5	9.494	46.0615	5.27083	10.7228	103.437		6.5	9.306	43.1692	5.27083	10.5105	99.4087
2019	12		68.6	12.9	14.1105	9.38372	11.9417	16.1811	35.5009	5.5	9.2	67.2727	5.01667	10.55	110.299		12.9	14.2858	10.7423	11.9417	16.382	37.1839		12.9	13.9394	8.05721	11.9417	15.9848	33.8576		5.5	9.292	68.9455	5.01667	10.6555	112.402		5.5	9.108	65.6	5.01667	10.4445	108.196
2020	1	2020	69.9	22.6	18.0983	-19.9192	12.3792	16.6795	34.7387	11.6	11.8	1.72414	5.4375	10.875	100		22.6	18.323	-18.9246	12.3792	16.8867	36.4123		22.6	17.8788	-20.8904	12.3792	16.4773	33.1047		11.6	11.918	2.74138	5.4375	10.9838	102		11.6	11.682	0.706897	5.4375	10.7662	98
2020	2		69.3	7.2	16.2577	125.802	13.5042	17.5998	30.3285	3.6	10.6	194.444	6.13333	11.475	87.0924		7.2	16.4597	128.607	13.5042	17.8184	31.9473		7.2	16.0606	123.064	13.5042	17.3863	28.748		3.6	10.706	197.389	6.13333	11.5898	88.9633		3.6	10.494	191.5	6.13333	11.3602	85.2215
2020	3		69.5	9.7	16.8712	73.9304	14.7375	18.5456	25.8395	2.9	11	279.31	6.62917	12.0917	82.401		9.7	17.0808	76.0907	14.7375	18.7759	27.4025		9.7	16.6667	71.8211	14.7375	18.3207	24.3134		2.9	11.11	283.103	6.62917	12.2126	84.225		2.9	10.89	275.517	6.62917	11.9708	80.577
2020	4		70	17.8	18.405	3.39888	16.5542	19.8109	19.6734	7.6	12	57.8947	7.5625	12.9167	70.7989		17.8	18.6336	4.68315	16.5542	20.057	21.1598		17.8	18.1818	2.14494	16.5542	19.5707	18.2221		7.6	12.12	59.4737	7.5625	13.0458	72.5069		7.6	11.88	56.3158	7.5625	12.7875	69.0909
2020	5		70.6	10.6	20.2455	90.9953	20.325	23.198	14.1351	3.3	13.2	300	9.85417	15.125	53.4884		10.6	20.497	93.3675	20.325	23.4861	15.5528		10.6	20	88.6791	20.325	22.9166	12.751		3.3	13.332	304	9.85417	15.2763	55.0233		3.3	13.068	296	9.85417	14.9737	51.9535
2020	6		71.7	18.3	23.6198	29.0697	24.8167	27.6586	11.4518	10.1	15.4	52.4752	12.3875	18.0333	45.5769		18.3	23.9131	30.6728	24.8167	28.0022	12.8361		18.3	23.3333	27.5044	24.8167	27.3232	10.1002		10.1	15.554	54	12.3875	18.2137	47.0326		10.1	15.246	50.9505	12.3875	17.853	44.1211
2020	7		71.8	20.5	23.9265	16.7146	27.4458	30.1254	9.76313	10.3	15.6	51.4563	13.7917	19.6417	42.4169		20.5	24.2237	18.1643	27.4458	30.4996	11.1264		20.5	23.6363	15.2992	27.4458	29.7601	8.43202		10.3	15.756	52.9709	13.7917	19.8381	43.8411		10.3	15.444	49.9417	13.7917	19.4453	40.9927
2020	8		73.4	26.4	28.8345	9.22159	29.0292	30.9945	6.77031	11.7	18.8	60.6838	14.6583	20.2083	37.8624		26.4	29.1926	10.5782	29.0292	31.3795	8.09645		26.4	28.4848	7.89705	29.0292	30.6187	5.47549		11.7	18.988	62.2906	14.6583	20.4104	39.241		11.7	18.612	59.0769	14.6583	20.0062	36.4838
2020	9		71.4	17.3	22.6995	31.211	31.925	32.1193	0.608555	5.3	14.8	179.245	16.4125	20.9417	27.5958		17.3	22.9814	32.8407	31.925	32.5182	1.85817		17.3	22.4242	29.6198	31.925	31.7298	-0.611539		5.3	14.948	182.038	16.4125	21.1511	28.8718		5.3	14.652	176.453	16.4125	20.7323	26.3199
2020	10		74.2	38.3	31.2885	-18.3068	35.7042	33.6658	-5.70901	22.9	20.4	-10.917	19.025	21.95	15.3745		38.3	31.6771	-17.2921	35.7042	34.084	-4.53786		38.3	30.9091	-19.2975	35.7042	33.2575	-6.85249		22.9	20.604	-10.0262	19.025	22.1695	16.5283		22.9	20.196	-11.8079	19.025	21.7305	14.2208
2020	11		88	71.1	73.62	3.5443	39.5792	35.3146	-10.7748	40.4	48	18.8119	21.9	23.025	5.13699		71.1	74.5344	4.83038	39.5792	35.7532	-9.66657		71.1	72.7272	2.28861	39.5792	34.8863	-11.8568		40.4	48.48	20	21.9	23.2553	6.18836		40.4	47.52	17.6238	21.9	22.7948	4.08562
2020	12		84.2	63.1	61.9635	-1.80111	44.4083	37.4363	-15.6999	32.4	40.4	24.6914	25.2625	24.4083	-3.38116		63.1	62.7331	-0.581426	44.4083	37.9013	-14.6528		63.1	61.2121	-2.99198	44.4083	36.9823	-16.7222		32.4	40.804	25.9383	25.2625	24.6524	-2.41498		32.4	39.996	23.4444	25.2625	24.1643	-4.34735
2021	1		73.6	35.5	29.448	-17.0479	49.8708	40.2354	-19.3208	18.4	19.2	4.34783	29.0208	26.2333	-9.60517		35.5	29.8138	-16.0176	49.8708	40.7351	-18.3188		35.5	29.0909	-18.0539	49.8708	39.7474	-20.2992		18.4	19.392	5.3913	29.0208	26.4957	-8.70122		18.4	19.008	3.30435	29.0208	25.971	-10.5091
2021	2		72.4	32.3	25.767	-20.226	53.9042	42.5488	-21.0659	17.6	16.8	-4.54545	31.8542	27.7417	-12.9104		32.3	26.087	-19.2352	53.9042	43.0773	-20.0855		32.3	25.4545	-21.1934	53.9042	42.0328	-22.0231		17.6	16.968	-3.59091	31.8542	28.0191	-12.0395		17.6	16.632	-5.5	31.8542	27.4643	-13.7813
2021	3		75.2	54.1	34.356	-36.4954	59.4833	45.5012	-23.5059	31	22.4	-27.7419	35.7375	29.6667	-16.9873		54.1	34.7827	-35.7066	59.4833	46.0664	-22.5558		54.1	33.9394	-37.2655	59.4833	44.9495	-24.4335		31	22.624	-27.0194	35.7375	29.9633	-16.1572		31	22.176	-28.4645	35.7375	29.37	-17.8174
2021	4		76.4	64.1	38.037	-40.6599	65.8333	49.4507	-24.8851	42.2	24.8	-41.2322	40.0083	32.2417	-19.4126		64.1	38.5094	-39.9229	65.8333	50.0649	-23.9521		64.1	37.5757	-41.3795	65.8333	48.851	-25.796		42.2	25.048	-40.6445	40.0083	32.5641	-18.6067		42.2	24.552	-41.8199	40.0083	31.9193	-20.2185
2021	5		77.1	57.3	40.1842	-29.8704	68.1542	50.7927	-25.4738	37.7	26.2	-30.504	41.7708	33.1167	-20.7182		57.3	40.6834	-28.9994	68.1542	51.4236	-24.5482		57.3	39.6969	-30.7209	68.1542	50.1767	-26.3776		37.7	26.462	-29.809	41.7708	33.4478	-19.9254		37.7	25.938	-31.1989	41.7708	32.7855	-21.511
2021	6		81.8	87.5	54.6015	-37.5983	72.025	52.3264	-27.3496	56.4	35.6	-36.8794	44.8292	34.1167	-23.8963		87.5	55.2797	-36.8232	72.025	52.9764	-26.4473		87.5	53.9393	-38.355	72.025	51.6919	-28.2307		56.4	35.956	-36.2482	44.8292	34.4578	-23.1352		56.4	35.244	-37.5106	44.8292	33.7755	-24.6573
2021	7		83.6	82.4	60.123	-27.0352	79.7625	57.7585	-27.5869	54.2	39.2	-27.6753	50.1625	37.6583	-24.9273		82.4	60.8698	-26.1289	79.7625	58.4759	-26.6875		82.4	59.3939	-27.92	79.7625	57.058	-28.4651		54.2	39.592	-26.952	50.1625	38.0349	-24.1766		54.2	38.808	-28.3985	50.1625	37.2817	-25.678
2021	8		79.7	61.3	48.1598	-21.436	88.95	65.555	-26.3013	35.8	31.4	-12.2905	56.1167	42.7417	-23.8343		61.3	48.7579	-20.4602	88.95	66.3693	-25.3859		61.3	47.5757	-22.3887	88.95	64.76	-27.195		35.8	31.714	-11.4134	56.1167	43.1691	-23.0726		35.8	31.086	-13.1676	56.1167	42.3142	-24.5959
2021	9		88.2	116.3	74.2335	-36.1707	99.7	75.1026	-24.6714	74.4	48.4	-34.9462	63.0167	48.9667	-22.2957		116.3	75.1555	-35.3779	99.7	76.0354	-23.7358		116.3	73.3333	-36.9447	99.7	74.1918	-25.5849		74.4	48.884	-34.2957	63.0167	49.4563	-21.5186		74.4	47.916	-35.5968	63.0167	48.477	-23.0727
2021	10		88.3	91.7	74.5402	-18.7129	110.242	87.3598	-20.7561	56.3	48.6	-13.6767	69.5958	56.9583	-18.1584		91.7	75.4661	-17.7033	110.242	88.4449	-19.7718		91.7	73.6363	-19.6987	110.242	86.3004	-21.7171		56.3	49.086	-12.8135	69.5958	57.5279	-17.34		56.3	48.114	-14.54	69.5958	56.3887	-18.9768
2021	11		84.4	73.4	62.577	-14.7452	121.95	102.058	-16.3114	49.3	40.8	-17.2414	76.6292	66.5417	-13.164		73.4	63.3542	-13.6863	121.95	103.326	-15.2719		73.4	61.8181	-15.7791	121.95	100.821	-17.3263		49.3	41.208	-16.4138	76.6292	67.2071	-12.2957		49.3	40.392	-18.069	76.6292	65.8762	-14.0324
2021	12		99.8	153.7	109.816	-28.5514	132.692	114.546	-13.6754	96.9	71.6	-26.1094	83.225	74.6833	-10.2633		153.7	111.18	-27.664	132.692	115.968	-12.6032		153.7	108.485	-29.4179	132.692	113.156	-14.7223		96.9	72.316	-25.3705	83.225	75.4302	-9.36598		96.9	70.884	-26.8483	83.225	73.9365	-11.1607
2022	1		100.5	130.6	111.964	-14.2697	141.967	125.269	-11.7617	81.9	73	-10.8669	89.0375	81.675	-8.26899		130.6	113.354	-13.2049	141.967	126.825	-10.6657		130.6	110.606	-15.3094	141.967	123.75	-12.8317		81.9	73.73	-9.97558	89.0375	82.4917	-7.35168		81.9	72.27	-11.7582	89.0375	80.8582	-9.1863
2022	2		106.5	157.7	130.369	-17.3312	152.454	135.916	-10.8481	97	85	-12.3711	95.7625	88.6167	-7.46204		157.7	131.988	-16.3044	152.454	137.604	-9.74077		157.7	128.788	-18.3337	152.454	134.268	-11.9292		97	85.85	-11.4948	95.7625	89.5028	-6.53666		97	84.15	-13.2474	95.7625	87.7305	-8.38742
2022	3		115.8	186.7	158.896	-14.8921	161.633	146.869	-9.13425	117.2	103.6	-11.6041	101.771	95.7583	-5.90788		186.7	160.87	-13.835	161.633	148.694	-8.00565		186.7	156.97	-15.9242	161.633	145.088	-10.2362		117.2	104.636	-10.7201	101.771	96.7159	-4.96696		117.2	102.564	-12.4881	101.771	94.8007	-6.8488
2022	4		131.7	184.5	207.67	12.5581	170.129	158.718	-6.70761	113.9	135.4	18.8762	107.404	103.483	-3.65054		184.5	210.249	13.9562	170.129	160.689	-5.54887		184.5	205.151	11.1931	170.129	156.793	-7.83898		113.9	136.754	20.065	107.404	104.518	-2.68705		113.9	134.046	17.6874	107.404	102.449	-4.61404
2022	5		136.8	217.9	223.314	2.48463	178.987	169.032	-5.5621	134.8	145.6	8.01187	113.042	110.208	-2.50645		217.9	226.088	3.75754	178.987	171.131	-4.38913		217.9	220.606	1.24178	178.987	166.982	-6.70736		134.8	147.056	9.09199	113.042	111.31	-1.53151		134.8	144.144	6.93175	113.042	109.106	-3.48139
2022	6		119.8	184.7	171.166	-7.32729	187.771	179.244	-4.54095	117.6	111.6	-5.10204	118.513	116.867	-1.38874		184.7	173.292	-6.17624	187.771	181.471	-3.3553		184.7	169.091	-8.45114	187.771	177.071	-5.6986		117.6	112.716	-4.15306	118.513	118.035	-0.40263		117.6	110.484	-6.05102	118.513	115.698	-2.37485
2022	7		129.5	207.8	200.921	-3.31027	200.667	194.543	-3.05146	132.5	131	-1.13208	126.825	126.842	0.0131415		207.8	203.417	-2.10934	200.667	196.96	-1.84731		207.8	198.485	-4.48284	200.667	192.184	-4.22717		132.5	132.31	-0.143396	126.825	128.11	1.01327		132.5	129.69	-2.12075	126.825	125.573	-0.98699
2022	8		117.1	187.6	162.884	-13.1747	214.712	211.517	-1.48831	118.9	106.2	-10.6812	136.129	137.908	1.30697		187.6	164.907	-12.0963	214.712	214.144	-0.264745		187.6	160.909	-14.2276	214.712	208.952	-2.68298		118.9	107.262	-9.78806	136.129	139.287	2.32004		118.9	105.138	-11.5744	136.129	136.529	0.2939
2022	9		136.5	210.3	222.394	5.75071	223.354	223.851	0.222358	135.5	145	7.01107	142.296	145.95	2.56801		210.3	225.156	7.06419	223.354	226.631	1.46717		210.3	219.697	4.46826	223.354	221.136	-0.993053		135.5	146.45	8.08118	142.296	147.41	3.59369		135.5	143.55	5.94096	142.296	144.49	1.54233
2022	10		132.7	201.6	210.737	4.53237	230.304	230.817	0.2225	130.4	137.4	5.3681	147.15	150.492	2.27093		201.6	213.355	5.83071	218.654	233.683	6.87355		201.6	208.182	3.26469					130.4	138.774	6.42178					130.4	136.026	4.31442
2022	11		120.7	176.1	173.927	-1.23382	237.442	235.558	-0.793133	110.5	113.4	2.62443	152.283	153.583	0.853672		176.1	176.088	-0.00708688					176.1	171.818	-2.43157					110.5	114.534	3.65068					110.5	112.266	1.59819
2022	12		143.4	261.8	243.56	-6.96734				167	158.8	-4.91018					261.8	246.585	-5.81183					261.8	240.606	-8.09556					167	160.388	-3.95928					167	157.212	-5.86108
2023	1		176.6	332	345.4	4.0363				211.3	225.2	6.57832					332	349.691	5.32848					332	341.212	2.77463					211.3	227.452	7.64411					211.3	222.948	5.51254
2023	2		163.2	293.4	304.296	3.7137				190.9	198.4	3.92876					293.4	308.076	5.00188					293.4	300.606	2.45595					190.9	200.384	4.96805					190.9	196.416	2.88947
2023	3		155.6	258.4	280.983	8.73955				171.3	183.2	6.94688					258.4	284.473	10.0902					258.4	277.575	7.42085					171.3	185.032	8.01635					171.3	181.368	5.87741
2023	4		146.4	279.6	252.762	-9.59871				176.3	164.8	-6.52297						255.901							249.697							166.448							163.152
2023	5		159.2	294.1	292.026	-0.705202				195.6	190.4	-2.65849						295.653							288.485							192.304							188.496
2023	6
2023	7
2023	8								0.0978349						-0.0102453							1.3411							-1.11607							0.989652							-1.01014
2023	9
2023	10
2023	11
2023	12

## Sheet: ISN
		ADJUSTED	ISN	FITTED	%J/I	SMOOTHED	SMOOTHED	%		FITTED	SMOOTHED	SMOOTHED	% DIFF
		FLUX	MEAN	ISN	Difference	ISN	Fitted	Difference		FLUX	FITTED	ADJUSTED	SMOOTHED
		STAR	SUNSPOT	FROM	Fitted/		ISN	SMOOTHED			FLUX	FLUX	FITTED
			NUMBER	FLUX	ISN		FROM	FITTED					FLUX
2012	1	128.1	94.4	100.957	6.9465		FLUX	ISN		123.944			VS
	2	104	47.8	63	31.7992			VS		94.353			SMOOTHED
	3	113.5	86.6	77.9625	-9.97402			SMOOTHED		118.991			ADJUSTED
	4	113.9	85.9	78.5925	-8.50698			ISN		118.547			FLUX
	5	124	96.5	94.5	-2.07254					125.278
	6	123.4	92	93.555	1.69022					122.42
	7	138.5	100.1	117.337	17.2203	84.4625	87.045	3.05757		127.564	117.634	119.267	-1.36918
	8	118.3	94.8	85.5225	-9.78639	85.0792	86.5725	1.75523		124.198	118.025	118.967	-0.791311
	9	124.3	93.7	94.9725	1.35806	85.2792	86.2116	1.09335		123.5	118.152	118.737	-0.492876
	10	122.4	76.5	91.98	20.2353	85.825	86.7825	1.11564		112.578	118.499	119.1	-0.504723
	11	118.3	87.6	85.5225	-2.37158	87.7042	88.2459	0.617725		119.626	119.692	120.029	-0.280782
	12	105	56.8	64.575	13.6884	88.0542	88.2853	0.262504		100.068	119.914	120.054	-0.116423
2013	1	123.1	96.1	93.0825	-3.13996	86.8375	86.3888	-0.51677		125.023	119.142	118.85	0.24553
	2	101.8	60.9	59.535	-2.24138	86.1333	85.1287	-1.16631		102.672	118.695	118.05	0.546096
	3	110.2	78.3	72.765	-7.06897	84.375	83.7769	-0.708889		113.721	117.578	117.192	0.329766
	4	125.9	107.3	97.4925	-9.14026	84.3208	83.0025	-1.56347		132.135	117.544	116.7	0.72299
	5	134.3	120.2	110.723	-7.88478	86.9958	85.3388	-1.90478		140.327	119.242	118.183	0.896083
	6	113.7	76.7	78.2775	2.05671	90.9	89.5978	-1.43255		112.704	121.722	120.887	0.689898
	7	119.3	86.2	87.0975	1.04118	94.5792	94.0209	-0.590224		118.737	124.058	123.696	0.292603
	8	118.3	91.8	85.5225	-6.83824	99	100.177	1.18845		122.293	126.865	127.604	-0.579265
	9	103.7	54.5	62.5275	14.7294	104.65	106.923	2.17182		98.6075	130.453	131.887	-1.08786
	10	131.2	114.4	105.84	-7.48252	106.967	110.677	3.46827		136.644	131.924	134.271	-1.74796
	11	145.1	113.9	127.732	12.1444	106.863	111.825	4.64382		136.327	131.858	135	-2.32764
	12	143.1	124.2	124.582	0.307971	107.633	112.527	4.54678		142.867	132.347	135.446	-2.28775
2014	1	152.4	117	139.23	19	109.308	114.798	5.02201		138.295	133.411	136.888	-2.53983
	2	166.3	146.1	161.123	10.2823	110.521	116.904	5.77587		156.774	134.181	138.225	-2.92586
	3	148.5	128.7	133.088	3.40909	114.296	120.448	5.38278		145.724	136.578	140.475	-2.77426
	4	144.8	112.5	127.26	13.12	116.425	124.786	7.18139		135.438	137.93	143.229	-3.69987
	5	132.9	112.5	108.518	-3.54	114.979	126.623	10.1273		135.438	137.012	144.396	-5.11376
	6	125.8	102.9	97.335	-5.40816	114.079	127.739	11.974		129.341	136.44	145.104	-5.97081
	7	141.8	100.2	122.535	22.2904	112.608	127.45	13.1802		127.627	135.506	144.921	-6.49633
	8	127.9	106.9	100.643	-5.8536	108.3	123.815	14.3257		131.882	132.77	142.613	-6.90122
	9	148.1	130	132.457	1.89038	101.9	119.602	17.3715		146.55	128.706	139.938	-8.02573
	10	152.9	90	140.018	55.575	97.2583	117.042	20.3416		121.15	125.759	138.312	-9.07616
	11	151.4	103.6	137.655	32.8716	94.7208	115.375	21.8056		129.786	124.148	137.254	-9.54903
	12	153.8	112.9	141.435	25.2746	92.2167	114.719	24.4017		135.692	122.558	136.837	-10.4357
2015	1	137.3	93	115.448	24.1371	89.2667	112.704	26.2558		123.055	120.684	135.558	-10.9724
	2	126	66.7	97.65	46.4018	86.0625	109.364	27.0752		106.355	118.65	133.437	-11.0822
	3	124.6	54.5	95.445	75.1284	82.15	105.079	27.9108		98.6075	116.165	130.717	-11.132
	4	129.7	75.3	103.477	37.4203	78.9083	98.8444	25.2648		111.816	114.107	126.758	-9.98084
	5	122.6	88.8	92.295	3.93581	76.0833	92.6691	21.7994		120.388	112.313	122.837	-8.56789
	6	126.1	66.5	97.8075	47.0789	72.0708	86.8416	20.4947		106.227	109.765	119.138	-7.86698
	7	110.8	65.8	73.71	12.0213	68.2833	81.4931	19.3456		105.783	107.36	115.742	-7.24177
	8	108	64.4	69.3	7.6087	66.3542	77.4112	16.6637		104.894	106.135	113.15	-6.19983
	9	102.7	78.6	60.9525	-22.4523	65.9083	73.5394	11.5783		113.911	105.852	110.692	-4.37239
	10	103.3	63.6	61.8975	-2.67689	64.3333	68.9653	7.19997		104.386	104.852	107.787	-2.72372
	11	106.9	62.2	67.5675	8.62942	61.2208	64.8309	5.89686		103.497	102.875	105.162	-2.17499
	12	109.5	58	71.6625	23.556	57.75	60.3094	4.43182		100.83	100.671	102.292	-1.58411
2016	1	100.1	57	56.8575	-0.25	54.4417	56.1422	3.12356		100.195	98.5705	99.6458	-1.0792
	2	101	56.4	58.275	3.32447	52.4583	53.3334	1.66819		99.814	97.311	97.8625	-0.563503
	3	90.6	54.1	41.895	-22.5601	50.45	51.0431	1.17567		98.3535	96.0357	96.4083	-0.386464
	4	94	37.9	47.25	24.6702	47.775	48.9628	2.48626		88.0665	94.3371	95.0875	-0.789142
	5	95.3	51.5	49.2975	-4.2767	44.8167	45.8325	2.26664		96.7025	92.4586	93.1	-0.688955
	6	84.5	20.5	32.2875	57.5	41.4708	41.4553	-0.0374259		77.0175	90.334	90.3208	0.0145546
	7	88.9	32.4	39.2175	21.0417	38.5375	37.3931	-2.96951		84.574	88.4713	87.7417	0.831584
	8	87.1	50.2	36.3825	-27.5249	36	34.0331	-5.46354		95.877	86.86	85.6083	1.46209
	9	88.7	44.6	38.9025	-12.7747	33.2333	31.2309	-6.02526		92.321	85.1032	83.8292	1.51976
	10	85.6	33.4	34.02	1.85629	31.4833	29.2688	-7.03415		85.209	83.9919	82.5833	1.70565
	11	76.9	21.4	20.3175	-5.05841	29.8917	27.0834	-9.39469		77.589	82.9812	81.1958	2.19885
	12	72.8	18.5	13.86	-25.0811	28.4792	25.2787	-11.2377		75.7475	82.0843	80.05	2.54125
2017	1	74.9	26.1	17.1675	-34.2241	27.8167	24.2025	-12.9928		80.5735	81.6636	79.3667	2.89406
	2	75	26.4	17.325	-34.375	26.475	23.1328	-12.6239		80.764	80.8116	78.6875	2.69944
	3	73.9	17.7	15.5925	-11.9068	25.7042	22.89	-10.9483		75.2395	80.3221	78.5333	2.27777
	4	80.8	32.3	26.46	-18.0805	24.825	22.47	-9.4864		84.5105	79.7639	78.2667	1.91296
	5	75.2	18.9	17.64	-6.66667	23.3292	21.4003	-8.26799		76.0015	78.814	77.5875	1.58082
	6	77.1	19.2	20.6325	7.46094	22.2458	20.7572	-6.6918		76.192	78.1261	77.1792	1.22693
	7	79.9	17.8	25.0425	40.6882	21.0125	20.055	-4.55681		75.303	77.3429	76.7333	0.794445
	8	79.8	32.6	24.885	-23.6656	19.5542	19.2675	-1.46601		84.701	76.4169	76.2333	0.24079
	9	92.3	43.7	44.5725	1.99657	18.2667	18.5391	1.49122		91.7495	75.5993	75.7708	-0.22634
	10	75.6	13.2	18.27	38.4091	16.6583	17.4497	4.7505		72.382	74.578	75.0792	-0.667462
	11	70.6	5.7	10.395	82.3684	15.4417	16.59	7.43659		67.6195	73.8055	74.5333	-0.976576
	12	69.3	8.2	8.3475	1.79878	15.05	16.2488	7.96512		69.207	73.5567	74.3167	-1.02254
2018	1	67.7	6.8	5.8275	-14.3015	14.225	15.5925	9.61336		68.318	73.0329	73.9	-1.17338
	2	70.2	10.7	9.765	-8.73832	12.5542	14.5031	15.5244		70.7945	71.9719	73.2083	-1.68893
	3	67.6	2.5	5.67	126.8	9.875	12.3834	25.4019		65.5875	70.2706	71.8625	-2.21517
	4	70.5	8.9	10.2375	15.0281	7.84583	10.4278	32.9089		69.6515	68.9821	70.6208	-2.32046
	5	72.4	13.1	13.23	0.992366	7.46667	9.79125	31.1328		72.3185	68.7413	70.2167	-2.10112
	6	74.7	15.6	16.8525	8.02885	7.22083	9.48281	31.3257		73.906	68.5852	70.0208	-2.05025
	7	72.3	1.6	13.0725	717.031	7.04583	9.48281	34.5875		65.016	68.4741	70.0208	-2.20896
	8	70.8	8.7	10.71	23.1034	6.67083	9.49594	42.3501		69.5245	68.236	70.0292	-2.56063
	9	69	3.3	7.875	138.636	6.54583	9.62062	46.9733		66.0955	68.1566	70.1083	-2.78388
	10	69.1	4.9	8.0325	63.9286	6.84167	9.98813	45.9896		67.1115	68.3445	70.3417	-2.8393
	11	67.4	4.9	5.355	9.28571	6.71667	10.1719	51.4423		67.1115	68.2651	70.4583	-3.11283
	12	67.8	3.1	5.985	93.0645	5.98333	9.90937	65.6163		65.9685	67.7994	70.2917	-3.54558
	1	69.2	7.7	8.19	6.36364	5.35417	9.42375	76.0078		68.8895	67.3999	69.9833	-3.6915
	2	68.9	0.8	7.7175	864.688	4.98333	9.08906	82.3892		64.508	67.1644	69.7708	-3.73568
	3	70.8	9.4	10.71	13.9362	4.55	8.93156	96.2981		69.969	66.8892	69.6708	-3.99246
	4	72.9	9.1	14.0175	54.0385	4.27083	8.77406	105.441		69.7785	64.0347	69.5708	-7.95751
	5	72.8	9.9	13.86	40	3.9	8.72156	123.63		70.2865	58.4421	69.5375	-15.956
	6	70.3	1.2	9.9225	726.875	3.65417	8.85938	142.446		64.762	52.8971	69.625	-24.0257
	7	69.3	0.9	8.3475	827.5	3.5375	8.95781	153.224		64.5715	47.278	69.6875	-32.1571
	8	68.7	0.5	7.4025	1380.5	3.46667	9.03	160.481		64.3175	41.7198	69.7333	-40.1724
	9	68.7	1.1	7.4025	572.955	3.12083	8.97094	187.453		64.6985	36.1166	69.6958	-48.1797
	10	67	0.4	4.725	1081.25
	11	68.7	0.5	7.4025	1380.5
	12	68.6	1.6	7.245	352.812
2020	1	69.9	6.4	9.2925	45.1953
	2	69.3	0.4	8.3475	1986.87
	3	69.5	1.5	8.6625	477.5
	4
	5							9.21822					-4.00582
	6
	7
	8
	9
	10
	11
	12
	1
	2
	3
	4
	5
	6
	7
	8
	9
	10
	11
	12
	1
	2
	3
	4
	5
	6
	7
	8
	9
	10
	11
	12
	1
	2
	3
	4
	5
	6
	7
	8
	9
	10
	11
	12

## Sheet: Blad1
20230831	139.9			214	130	77	5.3	5	2023-07-03	11221122	12233322	11111233	309-427	4
20230830	138.6			191	137	94	4.8	5	2023-07-02	21112110	21113321	50014320	304-329	9
20230829	142.2			200	144	82	3.6	4	0-7	12112	11023312	23215	314-377	11
20230828	141.7			203	121	68	5.6	6	2023-07-03	12221221	12342222	33223343	301-388	7
20230827	141.5			227	103	69	9.5	10	2018-04-01	33212221	44412331	55123344	312-399	1
20230826	139.3			191	97	75	5.9	6	2023-07-05	12212212	13223222	23224444	318-450	4	1
20230825	138.9			160	96	77	3.6	4	2023-07-02	21001111	11111211	32111223	325-513	6	1
20230824	144.1			193	116	86	7.1	7	0-15	1112333	11113422	103366	360-536	11
20230823	147.0			179	113	99	3.0	3	2023-06-02	11000012	11112312	20000102	351-451	18
20230822	150.9			201	138	96	6.6	7	2018-03-01	23211111	23311321	55222103	396-553	11	1
20230821	148.7			159	118	102	7.8	8	2023-12-05	22323121	21322222	41233133	519-682	15
20230820	146.3			192	116	93	8.1	8	2018-04-01	33121122	33122323	55122225	451-680	5
20230819	150.6			203	141	104	6.9	7	2015-04-01	21111132	12112333	41112243	415-538	6
20230818	150.6			261	170	112	10.3	10	2015-05-01	22331223	23332323	23331335	326-569	5
20230817	151.9			269	170	135	5.6	6	2023-09-02	22202211	32311422	52213231	297-393	16
20230816	160.1			303	219	140	6.8	7	2015-02-01	21013321	11233532	41013442	279-392	17
20230815	158.1			277	190	107	2.9	3	2023-04-02	11011	11112321	21012133	279-329	15
20230814	154.0			296	172	85	3.9	4	2023-05-02	11001111	11012411	40002232	317-365	12
20230813	150.4			275	169	78	4.0	4	2023-07-03	21111111	22122321	42122101	313-440	8
20230812	148.3			195	106	61	6.1	6	2023-09-04	22211122	23212422	34123333	386-510	23
20230811	152.8			199	126	104	3.5	4	2023-05-02	11101111	21212312	21111222	397-509	22
20230810	155.7			206	157	83	6.3	6	2023-12-04	22111312	23222422	34123433	350-552	18
20230809	153.4			271	149	103	5.9	6	2023-09-04	21112222	222122**	42124343	351-453	10
20230808	158.9			301	186	115	7.3	7	2027-03-01	41111211	42112312	52023242	392-614	19	1
20230807	169.7			268	179	101	9.9	10	2027-02-01	32012134	32113333	66224256	316-612	19	4	1
20230806	173.5			273	188	97	1.6	2	0-4	110	11211210	10100223	300-390	13	1
20230805	175.8	170.4	175.4	271	155	100	33.4	33	1994-03-01	56553211	*7553222	67643222	303-476	22	2	1
20230804	170.8	162.7	167.5	291	200	122	13.3	13	0-27	1113444	********	1233446	320-410	29	1
20230803	162.9			301	185	124	4.8	5	2023-07-02	12122100	1212341*	32233310	325-403	34	1
20230802	172.9	173.4	178.6	261	179	135	11.9	12	2027-04-01	21134422	22233422	42254533	352-493	43	5
20230801	174.7	182.4	187.9	298	201	160	8.0	8	2015-03-01	22113322	22123423	43114344	344-435	20	8
		31	214		1	201
		30	191		2	179
		29	200		3	185
		28	203		4	200
		27	227		5	155
		26	191		6	188
		25	160		7	179
		24	193		8	186
		23	179		9	149
		22	201		10	157
		21	159		11	126
		20	192		12	106
		19	203		13	169
		18	261		14	172
		17	269		15	190
		16	303		16	219
		15	277		17	170
		14	296		18	170
		13	275		19	141
		12	195		20	116
		11	199		21	118
		10	206		22	138
		9	271		23	113
		8	301		24	116
		7	268		25	96
		6	273		26	97
		5	271		27	103
		4	291		28	121
		3	301		29	144
		2	261		30	137
		1	298		31	130
