# Supplementary material for: Calculating the Strength of Solar Cycle 25: 365-Day High-Resolution Sunspot Smoothing and its Relationship with the 10.7cm Solar Flux
Source: Research Square preprint supplement (doi:10.21203/rs.3.rs-5148729/v1), 2025-03-25
Supplement: Supplementary file 7 [file dce8d2f1609feb95dddaab4b.xlsx]

## Sheet: Forecast precursor
drao date	drao	365 days smoothed		ISN	365 days smoothed													Maximum PEAK values JULY 6 - 10 end of each month
	adjusted	Adjusted Solar Flux			ISN																				#VALUE!
																		10,7 solar flux	ISN	Q/R	2K	Q/T	1K	Q/V	#DIV/0!
		Lowest values in RED			Lowest values in RED											End July		164.78	134.71	102.232	298.55	95.5193	194.02	98.4929	#VALUE!
																End August		163.84	132.12	102.401	290.45	95.6409	188.32	98.7001	#DIV/0!
		Highest values in BLUE			Highest values in BLUE		2K			1K						End September		162.96	132.29	102.318	288.44	95.6497	187.11	98.7093	#VALUE!
																End October		160.78	128.6	102.502	281.4	95.7136	182.8	98.7954	#DIV/0!
20220601	107.1			62			84			66						End November		159.8	126.4	102.642	276.76	95.774	180.396	98.8583	#DIV/0!
20220602	103.8			59			115			59						End December									#DIV/0!
20220603	103.6			56			110			78						End result									#DIV/0!
20220604	103.9			66			111			74								Maximum values end of each month - 182 days = end value							#DIV/0!
20220605	101.6			49			91			69						End July -182		149.7	115.98	102.907	259.27	95.7739	167.4	98.9427	#DIV/0!
20220606	99.3			32			106			72						End August - 182		153.4	119.67	102.819	263.86	95.8137	170.4	99.0023	#DIV/0!
20220607	101.3			7			55			34						End September -182		154.98	122.79	102.622	268.8	95.7656	173.9	98.912	#DIV/0!
20220608	102.9			3			81			52						End October -182		155.8	123	102.667	270.7	95.7554	175.2	98.8927	#DIV/0!
20220609	109.6			21			115			94						End November -182		158.2	125.1	102.646	275.2	95.7485	179	98.838	#DIV/0!
20220610	113.9			46			152			90						End December -182									#DIV/0!
20220611	115.6			39			193			70						End result		158.71	125.81		275.72		179.99		#DIV/0!
20220612	125.1			53			285			164															#DIV/0!
20220613	135.6			94			294			174															#DIV/0!
20220614	150.1			123			348			201															#DIV/0!
20220615	144.5			148			342			234															#DIV/0!
20220616	151.4			150			383			239									Predicted values						#DIV/0!
20220617	153.7			152			326			210								158.79	149.3		290.8		189.6		#DIV/0!
20220618	144.7			147			280			194								158.79	149.3		290.8		189.6		#DIV/0!
20220619	148.2			118			260			175								158.79	149.3		290.8		189.6		#DIV/0!
20220620	141			96			254			153								158.79	149.3		290.8		189.6		#DIV/0!
20220621	143.2			96			216			152								158.79	149.3		290.8		189.6		#DIV/0!
20220622	132.9			89			185			132								158.79	149.3		290.8		189.6		#DIV/0!
20220623	125.5			70			157			77								158.79	149.3		290.8		189.6		#DIV/0!
20220624	119.2			61			153			111								158.79	149.3		290.8		189.6		#DIV/0!
20220625	111.7			47			144			89								158.79	149.3		290.8		189.6		#DIV/0!
20220626	105.4			33			135			97															#DIV/0!
20220627	101.4			52			164			108									Difference predicted/measured						#DIV/0!
20220628	99.3			62			136			78								10,7 solar flux	ISN		2K		1K		#DIV/0!
20220629	99.4			37			125			94						End July -182		-5.72454	-22.3175		-10.8425		-11.7089		#DIV/0!
20220630	98.9			42			141			88						End August - 182		-3.39442	-19.8459		-9.2641		-10.1266		#DIV/0!
20220701	101.3			58			153			96						End September -182		-2.3994	-17.7562		-7.56534		-8.28059		#DIV/0!
20220702	103.6			64			187			135						End October -182		-1.88299	-17.6155		-6.91197		-7.59494		#DIV/0!
20220703	105.7			56			155			87						End November -182		-0.37156	-16.209		-5.36451		-5.59072		#DIV/0!
20220704	107.9			59			161			134						End December -182									#DIV/0!
20220705	113.1			78			222			126						End result		-0.050381	-15.7334		-5.18569		-5.06857		#DIV/0!
20220706	118.4			82			198			142															#DIV/0!
20220707	125.3			97			227			126									Measured Maximum Values						#DIV/0!
20220708	133.9			87			230			129						To measure the
20220709	141.5			93			268			162						downslope of the 10.7 solar flux, you need to subtract the baseline of 64 from the maximum value
20220710	158.2			107			262			177						158.71 - 64 = 94,71		(10.7 sfu-64)	ISN		2K		1K
20220711	166.4			125			277			168								94.71	125.81		275.72		179.99
20220712	170.4			114			258			155								94.71	125.81		275.72		179.99
20220713	170.3			116			284			178								94.71	125.81		275.72		179.99
20220714	174.6			123			298			168								94.71	125.81		275.72		179.99
20220715	177			135			354			218								94.71	125.81		275.72		179.99
20220716	182			151			315			190								94.71	125.81		275.72		179.99
20220717	166.5			138			247			169
20220718	154.3			124			261			133						Year 2024		(10.7 sfu-64)	ISN		2K		1K
20220719	148.8			111			255			185						End January -182		93	123.52		270.6		178.4
20220720	136.5			133			285			157						End February - 182		93.43	124.63		268.9		177.3
20220721	125.6			110			206			147						End March -182		93.27	123.14		266.7		176
20220722	118.4			98			217			162						End April -182		94.56			268.4		178
20220723	114.1			97			180			120						End May -182
20220724	110.5			80			175			113						End June -182
20220726	105.5			86			189			132
20220725	101.9			91			104			94									Difference measured Maximum
20220727	101.1			60			107			63						Year 2024		10,7 solar flux	ISN		2K		1K
20220728	96.3			42			84			49						End January -182		-1.80551	-1.82021		-1.85696		-0.883382
20220729	95.9			43			94			78						End February - 182		-1.35149	-0.937922		-2.47352		-1.49453
20220730	93.6			42			92			42						End March -182		-1.52043	-2.12225		-3.27143		-2.21679
20220731	97.1			34			98			73						End April -182		-0.158378	-100		-2.65487		-1.10562
20220801	98.2			27			97			40						End May -182
20220802	100.7			33			95			60						End June -182
20220803	102.8			36			124			62
20220804	111.9			42			127			97
20220805	115.4			71			187			107
20220806	119.7			72			172			117
20220807	119.4			85			178			133
20220808	116.2			80			157			137
20220809	112.4			61			155			92
20220810	110.4			63			177			127
20220811	117.9			71			241			144
20220812	122.7			102			242			152
20220813	127.5			109			242			139
20220814	128.8			110			292			156
20220815	134			110			302			219
20220816	131.7			123			301			190
20220817	125.7			111			269			168
20220818	119.4			87			190			122
20220819	107.9			83			178			108
20220820	103.9			74			175			120
20220821	99.2			58			161			111
20220822	104.9			71			160			98
20220823	103.2			50			131			64
20220824	110.2			60			145			102
20220825	120.3			93			216			152
20220826	121.2			94			201			124
20220827	130.2			94			213			170
20220828	132			83			207			122
20220829	133.1			70			171			91
20220830	128.1			48			139			72
20220831	115.5			43			171			91
20220901	118.4			62			137			97
20220902	132.1			63			154			88
20220903	125.6			68			189			106
20220904	130.4			72			205			144
20220905	132.4			83			218			179
20220906	128.2			75			210			153
20220907	128.1			96			193			156
20220908	128.5			97			229			142
20220909	128			103			242			121
20220910	137.7			117			310			173
20220911	153.5			128			322			182
20220912	152.3			141			327			222
20220913	155.9			118			235			154
20220914	146			91			217			126
20220915	141.3			101			190			111
20220916	132.5			92			199			139
20220917	132.8			86			150			103
20220918	137.4			73			151			108
20220919	129.1			70			163			116
20220920	138.4			68			155			115
20220921	138			84			164			107
20220922	137.7			105			210			129
20220923	147.3			131			285			183
20220924	147.4			147			305			186
20220925	135.5			135			265			165
20220926	135.8			132			225			153
20220927	135.1			108			157			100
20220928	135.3			85			144			82
20220929	137.7			72			144			89
20220930	137.5			76			214			136
20221001	148.3			110			240			165
20221002	154.1			128			267			174
20221003	155.3			165			297			188
20221004	152.5			167			263			168
20221005	161			164			315			212
20221006	155.6			162			297			195
20221007	159.5			163			276			190
20221008	156.9			154			278			173
20221009	160.1			129			251			170
20221010	162.7			120			226			158
20221011	149.8			106			236			148
20221012	140			103			209			126
20221013	129.4			83			173			107
20221014	119.9			82			182			89
20221015	114.4			46			181			123
20221016	118.4			75			178			132
20221017	124.8			73			144			103
20221018	113.1			50			107			86
20221019	112.3			49			141			102
20221020	114.8			36			156			85
20221021	108.4			57			157			96
20221022	103.9			70			124			90
20221023	107.3			52			182			107
20221024	113.6			54			187			89
20221025	115			78			146			108
20221026	120.9			83			146			108
20221027	128.1			86			197			118
20221028	127.7			89			194			116
20221029	132.1			87			174			113
20221030	128.7			75			158			98
20221031	126			63			169			105
20221101	126.1			85			229			157
20221102	127.7			98			163			127
20221103	123.3			78			210			150
20221104	115.7			103			238			154
20221105	128.8			115			230			142
20221106	128.5			96			202			116
20221107	132.1			100			231			154
20221108	129.8			103			150			95
20221109	135			98			152			105
20221110	136			85			158			119
20221111	134.9			74			130			72
20221112	135.4			88			173			108
20221113	134.1			111			225			147
20221114	138.5			96			166			95
20221115	131.3			86			147			116
20221116	130			90			143			114
20221117	116.5			59			167			108
20221118	113.4			57			194			113
20221119	112.4			75			230			140
20221120	116.3			87			240			123
20221121	114.2			77			176			126
20221122	112.9			73			190			117
20221123	110.5			71			151			78
20221124	106.9			76			171			97
20221125	105.7			72			170			74
20221126	104.3			78			155			103
20221127	104.4			72			171			89
20221128	104.1			56			91			55
20221129	105			28			110			54
20221130	108			28			120			68
20221201	115.4			51			121			93
20221202	120.6			71			165			128
20221203	130			75			199			142
20221204	139.6			93			230			142
20221205	145.4			103			257			156
20221206	140			119			284			169
20221207	143.6			127			327			206
20221208	138.8			128			281			172
20221209	144.6			111			299			195
20221210	137.4			122			293			209
20221211	143.2			140			302			188
20221212	146.2			157			342			244
20221213	148.3			159			396			281
20221214	159.6			148			291			197
20221215	160.7			141			279			176
20221216	158			131			239			143
20221217	149.7			131			265			158
20221218	150.7			127			258			157
20221219	147.5			113			267			169
20221220	141.7			112			258			164
20221221	134.2			100			204			132
20221222	127			98			210			148
20221223	123.6			85			211			127
20221224	129			93			280			176
20221225	139.3			105			312			187
20221226	145.5			115			274			140
20221227	153.8			94			249			162
20221228	155.1			103			231			139
20221229	157.4	365 days smoothed		123			263	365-day smoothed		163	365-day smoothed
20221230	162	Adjusted Solar Flux		124			283	2K		177	1K
20221231	159.5			98			246			136
20230101	147.5	145.885		108	110.893	103.155	267	253.614	95.7522	166	163.466	98.9245		128.969	-14.0155	251.182	0.968091	163.77	-0.185693					1.47408	2.28701	1.55148	146.678	145.885	0.793134
20230102	141.5	146.086		109	111.162	103.142	216	254.085	95.7495	157	163.838	98.9165		129.285	-14.0182	251.798	0.908221	164.172	-0.202928					1.47387	2.28572	1.55083	146.832	146.086	0.745934
20230103	143.6	146.264		108	111.384	103.132	292	254.507	95.7469	178	164.03	98.9169		129.565	-14.0328	252.343	0.857313	164.527	-0.30207					1.47266	2.28496	1.55159	146.969	146.264	0.705671
20230104	146	146.392		96	111.54	103.125	217	254.775	95.7459	158	164.197	98.9156		129.767	-14.0459	252.736	0.806927	164.783	-0.35547					1.4721	2.28417	1.55164	147.057	146.392	0.665255
20230105	149.2	146.513		112	111.712	103.115	274	254.97	95.7463	168	164.315	98.9166		129.959	-14.0401	253.11	0.734832	165.027	-0.431312					1.47088	2.28238	1.55171	147.12	146.513	0.606751
20230106	166.7	146.627		131	111.882	103.105	299	255.197	95.7456	178	164.496	98.9137		130.138	-14.0279	253.459	0.685934	165.254	-0.458903					1.47026	2.28095	1.55139	147.194	146.627	0.567184
20230107	173	146.715		133	112.129	103.084	292	255.521	95.7418	188	164.723	98.9067		130.276	-13.9297	253.728	0.70663	165.43	-0.42695					1.46905	2.27881	1.55121	147.3	146.715	0.584904
20230108	177.8	146.835		135	112.367	103.067	331	255.833	95.7395	213	164.951	98.9017		130.464	-13.8714	254.095	0.683991	165.669	-0.433609					1.46796	2.27676	1.55097	147.402	146.835	0.566997
20230109	184.7	146.941		148	112.597	103.05	369	256.121	95.7372	229	165.071	98.9016		130.631	-13.8053	254.42	0.66835	165.881	-0.488219					1.46603	2.27466	1.55158	147.495	146.941	0.554751
20230110	186.6	147.089		179	112.83	103.036	420	256.414	95.7364	273	165.247	98.9012		130.865	-13.7814	254.876	0.603457	166.178	-0.560547					1.46456	2.27256	1.5517	147.591	147.089	0.501825
20230111	188.7	147.169		168	113.055	103.018	350	256.589	95.7356	224	165.334	98.9013		130.992	-13.6931	255.122	0.575085	166.339	-0.603819					1.46243	2.2696	1.55194	147.648	147.169	0.478712
20230112	204.7	147.277		171	113.153	103.016	435	256.553	95.7406	246	165.351	98.907		131.162	-13.7298	255.453	0.430775	166.555	-0.722788					1.4613	2.26731	1.55157	147.636	147.277	0.359156
20230113	201.7	147.31		178	113.233	103.009	418	256.326	95.747	292	165.258	98.914		131.213	-13.7033	255.554	0.30216	166.62	-0.817871					1.45945	2.26371	1.55107	147.562	147.31	0.252148
20230114	220.4	147.331		189	113.211	103.014	451	256.088	95.7531	291	165.142	98.9214		131.246	-13.7413	255.617	0.18418	166.661	-0.911371					1.45871	2.26204	1.55071	147.485	147.331	0.153896
20230115	226.7	147.354		199	113.252	103.011	438	255.923	95.7577	267	165.104	98.9249		131.282	-13.7338	255.687	0.0922287	166.707	-0.961738					1.45785	2.25977	1.55007	147.431	147.354	0.0772932
20230116	220.7	147.407		190	113.31	103.009	380	256.055	95.7568	244	165.173	98.9244		131.366	-13.745	255.851	0.0798452	166.814	-0.98379					1.45771	2.25978	1.55023	147.474	147.407	0.0670137
20230117	214.6	147.543		188	113.43	103.007	395	256.211	95.7587	272	165.348	98.9232		131.58	-13.7939	256.268	-0.0223343	167.086	-1.04023					1.45771	2.25876	1.54953	147.525	147.543	-0.0182411
20230118	213.2	147.67		195	113.578	103.002	401	256.337	95.7608	258	165.419	98.927		131.78	-13.8124	256.657	-0.124804	167.34	-1.14769					1.45644	2.25692	1.54962	147.566	147.67	-0.104005
20230119	218.9	147.817		205	113.699	103.001	539	256.318	95.767	300	165.468	98.9333		132.012	-13.8726	257.109	-0.307899	167.635	-1.29211					1.45533	2.25436	1.54904	147.56	147.817	-0.257655
20230120	210.6	147.962		206	113.808	103.001	430	256.458	95.7695	276	165.488	98.941		132.24	-13.9384	257.554	-0.425732	167.924	-1.45108					1.45409	2.25342	1.54971	147.605	147.962	-0.357036
20230121	202.1	148.131		195	113.923	103.003	440	256.515	95.7747	278	165.501	98.9504		132.506	-14.0242	258.072	-0.603184	168.262	-1.64063					1.45274	2.25165	1.54993	147.624	148.131	-0.507047
20230122	192.3	148.306		166	114.052	103.003	400	256.696	95.7775	247	165.63	98.954		132.782	-14.1058	258.609	-0.739669	168.612	-1.76851					1.45223	2.25069	1.54981	147.683	148.306	-0.623167
20230123	183.2	148.47		162	114.216	102.999	350	256.899	95.7793	250	165.762	98.9568		133.04	-14.1488	259.111	-0.853948	168.94	-1.88119					1.45129	2.24923	1.54981	147.749	148.47	-0.72091
20230124	174.6	148.659		151	114.359	102.999	260	257.101	95.7821	208	165.89	98.9613		133.337	-14.2334	259.69	-0.996948	169.317	-2.02392					1.45061	2.2482	1.54983	147.815	148.659	-0.843584
20230125	166.5	148.852		137	114.529	102.997	260	257.419	95.7825	177	166.074	98.963		133.642	-14.3021	260.285	-1.10085	169.705	-2.13941					1.45006	2.24764	1.55003	147.919	148.852	-0.933677
20230126	146	149.042		110	114.764	102.987	231	257.74	95.7827	135	166.31	98.9617		133.942	-14.3178	260.868	-1.19909	170.085	-2.21968					1.44914	2.24582	1.54976	148.023	149.042	-1.01932
20230127	140.5	149.254		86	115.101	102.967	221	258.153	95.7816	115	166.592	98.9592		134.275	-14.2791	261.516	-1.2857	170.507	-2.29645					1.44735	2.24284	1.54962	148.158	149.254	-1.09568
20230128	133.4	149.495		85	115.471	102.947	250	258.666	95.7795	135	166.956	98.9542		134.655	-14.2467	262.257	-1.36935	170.991	-2.3595					1.44587	2.24009	1.5493	148.325	149.495	-1.17031
20230129	132.9	149.731		79	115.852	102.924	247	259.274	95.775	148	167.449	98.9419		135.027	-14.2006	262.981	-1.40945	171.462	-2.34054					1.44537	2.23797	1.54837	148.523	149.731	-1.20792
20230130	131.9	149.965		76	116.271	102.898	220	259.836	95.7715	142	167.814	98.9364		135.395	-14.1243	263.697	-1.46449	171.93	-2.3941					1.4433	2.23474	1.54836	148.706	149.965	-1.25852
20230131	132.9	150.189		80	116.69	102.871	199	260.386	95.7679	138	168.255	98.9263		135.747	-14.0385	264.384	-1.5121	172.378	-2.39169					1.44189	2.23143	1.54757	148.886	150.189	-1.30283
20230201	129.6	150.401		72	117.047	102.85	201	260.841	95.766	110	168.581	98.9216		136.081	-13.9878	265.035	-1.58222	172.802	-2.44258					1.44029	2.22852	1.54728	149.034	150.401	-1.36662
20230202	131	150.579		58	117.345	102.832	211	261.326	95.7621	135	168.918	98.9143		136.361	-13.9454	265.58	-1.60175	173.157	-2.44832					1.43949	2.22699	1.54706	149.192	150.579	-1.38635
20230203	130.7	150.754		64	117.592	102.82	197	261.775	95.7589	134	169.2	98.9098		136.637	-13.9386	266.117	-1.63147	173.507	-2.48254					1.43888	2.22614	1.54714	149.339	150.754	-1.41494
20230204	135.1	150.933		71	117.756	102.817	238	262.005	95.7607	157	169.332	98.9135		136.919	-13.9959	266.667	-1.74792	173.866	-2.6079					1.43798	2.22498	1.54729	149.414	150.933	-1.51909
20230205	140	151.094		74	117.893	102.816	297	262.282	95.7607	181	169.526	98.9127		137.173	-14.0551	267.161	-1.82608	174.188	-2.67637					1.43796	2.22474	1.54715	149.504	151.094	-1.58998
20230206	152.4	151.245		111	118.005	102.817	321	262.529	95.7611	215	169.652	98.915		137.411	-14.1221	267.624	-1.90381	174.49	-2.77254					1.43766	2.22472	1.54745	149.584	151.245	-1.66055
20230207	179.7	151.374		107	118.123	102.815	349	262.923	95.7574	215	169.786	98.9156		137.614	-14.1636	268.021	-1.9018	174.748	-2.83962					1.43737	2.22584	1.54855	149.713	151.374	-1.66125
20230208	192.3	151.498		125	118.236	102.813	373	263.241	95.7551	227	169.942	98.9147		137.81	-14.2038	268.401	-1.92254	174.997	-2.8882					1.43732	2.22641	1.549	149.817	151.498	-1.68176
20230209	209.1	151.634		129	118.362	102.811	375	263.321	95.7585	263	170.025	98.9184		138.024	-14.2456	268.818	-2.04506	175.268	-2.99189					1.43648	2.22471	1.54872	149.842	151.634	-1.79175
20230110	202.3	151.741		163	118.455	102.81	396	263.205	95.7651	268	169.975	98.9273		138.193	-14.2829	269.147	-2.20741	175.483	-3.13843					1.43494	2.22199	1.54849	149.805	151.741	-1.93638
20230211	204.1	151.822		166	118.395	102.823	451	263.077	95.771	302	169.849	98.9386		138.32	-14.4053	269.395	-2.34521	175.644	-3.29932					1.4346	2.22203	1.54888	149.763	151.822	-2.05918
20230212	194.6	151.896		159	118.373	102.832	397	263.167	95.7718	246	169.932	98.9387		138.436	-14.4929	269.621	-2.39356	175.792	-3.33365					1.43556	2.22321	1.54867	149.792	151.896	-2.10341
20230113	183.3	151.976		177	118.395	102.836	394	263.178	95.7747	237	169.975	98.9411		138.562	-14.5551	269.867	-2.47856	175.952	-3.39694					1.43567	2.22289	1.54833	149.796	151.976	-2.18011
20230214	175.3	152.053		159	118.427	102.839	329	263.11	95.7791	245	169.896	98.9498		138.684	-14.6061	270.103	-2.58918	176.106	-3.52651					1.4346	2.2217	1.54865	149.774	152.053	-2.27942
20230215	169.5	152.142		121	118.496	102.839	326	263.115	95.7823	216	169.975	98.9508		138.824	-14.6431	270.376	-2.68556	176.284	-3.5789					1.43444	2.22046	1.54796	149.776	152.142	-2.36668
20230216	159.2	152.224		91	118.589	102.836	223	263.115	95.7855	144	169.981	98.9554		138.953	-14.6555	270.628	-2.77622	176.449	-3.66562					1.43336	2.21871	1.54791	149.776	152.224	-2.44887
20230217	161.1	152.32		86	118.69	102.833	245	263.31	95.7848	180	170.112	98.9541		139.104	-14.6753	270.922	-2.80997	176.641	-3.69576					1.43324	2.21846	1.54786	149.839	152.32	-2.48135
20230218	163.6	152.447		104	118.819	102.83	285	263.378	95.7882	181	170.203	98.9568		139.305	-14.7055	271.312	-2.92442	176.895	-3.78307					1.43245	2.21663	1.54744	149.861	152.447	-2.58614
20230219	165.2	152.573		107	118.893	102.833	292	263.425	95.7919	194	170.192	98.9648		139.503	-14.7736	271.698	-3.0451	177.146	-3.92586					1.43147	2.21564	1.54781	149.876	152.573	-2.69671
20230220	156.3	152.718		112	119.036	102.83	232	263.419	95.7975	165	170.211	98.9723		139.731	-14.8111	272.144	-3.2058	177.437	-4.0723					1.42992	2.21294	1.5476	149.875	152.718	-2.8437
20230221	157.4	152.854		104	119.153	102.828	259	263.532	95.8002	149	170.321	98.9745		139.945	-14.857	272.56	-3.31232	177.708	-4.15704					1.42942	2.2117	1.54727	149.911	152.854	-2.9427
20230222	148.6	152.983		86	119.304	102.823	216	263.663	95.8022	145	170.455	98.975		140.148	-14.8729	272.955	-3.40436	177.966	-4.2206					1.42874	2.21001	1.54682	149.954	152.983	-3.02887
20230223	145.1	153.085		90	119.392	102.822	280	263.795	95.8032	178	170.493	98.9789		140.308	-14.9076	273.267	-3.46645	178.169	-4.30835					1.42801	2.20949	1.54724	149.997	153.085	-3.08764
20230224	160.7	153.144		117	119.384	102.828	255	263.641	95.8088	172	170.34	98.9905		140.402	-14.9699	273.449	-3.58664	178.288	-4.45793					1.42683	2.20835	1.54774	149.947	153.144	-3.19684
20230225	149.4	153.201		127	119.375	102.834	330	263.614	95.8116	201	170.266	98.9978		140.492	-15.0306	273.625	-3.65884	178.403	-4.56102					1.42631	2.20828	1.54825	149.938	153.201	-3.2633
20230226	155.9	153.241		119	119.348	102.84	242	263.652	95.8122	173	170.082	99.0098		140.554	-15.0874	273.745	-3.68712	178.481	-4.70577					1.4251	2.2091	1.55014	149.951	153.241	-3.28998
20230227	158.1	153.275		126	119.345	102.843	288	263.641	95.8138	188	170.079	99.012		140.608	-15.1219	273.85	-3.72807	178.55	-4.74386					1.42511	2.20906	1.55011	149.947	153.275	-3.3278
20230128	157.9	153.307		91	119.4	102.84	214	263.721	95.8133	125	170.225	99.0062		140.659	-15.1139	273.95	-3.73421	178.615	-4.69734					1.42567	2.20871	1.54925	149.973	153.307	-3.3345
20230301	159	153.343		93	119.553	102.826	217	263.863	95.8115	125	170.403	98.9989		140.716	-15.039	274.061	-3.7209	178.687	-4.63596					1.42533	2.20707	1.54847	150.019	153.343	-3.32395
20230302	165.8	153.417		100	119.679	102.819	233	263.981	95.8117	169	170.51	98.9976		140.832	-15.0198	274.287	-3.7576	178.835	-4.6551					1.42472	2.20573	1.54819	150.058	153.417	-3.35951
20230303	172.6	153.472		119	119.745	102.817	239	264.178	95.8094	162	170.537	98.9993		140.918	-15.0249	274.455	-3.74437	178.944	-4.69789					1.42417	2.20617	1.5491	150.122	153.472	-3.34973
20230304	178.6	153.476		127	119.797	102.811	290	264.268	95.8076	177	170.616	98.9954		140.925	-14.9919	274.467	-3.71585	178.952	-4.65787					1.42421	2.20596	1.5489	150.152	153.476	-3.32436
20230305	176.8	153.496		151	119.86	102.806	367	264.419	95.805	245	170.704	98.9919		140.956	-14.9659	274.528	-3.68219	178.991	-4.6299					1.42419	2.20606	1.54899	150.201	153.496	-3.29496
20230306	185	153.518		185	119.942	102.799	373	264.488	95.8043	266	170.718	98.9925		140.99	-14.9285	274.595	-3.68083	179.035	-4.6456					1.42333	2.20512	1.54927	150.223	153.518	-3.29455
20230307	177.5	153.553		186	120.03	102.793	306	264.674	95.8016	194	170.704	98.9952		141.045	-14.8996	274.703	-3.65072	179.105	-4.69059					1.42218	2.20506	1.55048	150.284	153.553	-3.26889
20230308	179.2	153.611		166	120.153	102.785	330	264.89	95.799	236	170.773	98.995		141.137	-14.8674	274.881	-3.63444	179.221	-4.71415					1.42129	2.2046	1.55113	150.354	153.611	-3.25641
20230309	176.2	153.707		156	120.252	102.782	304	265.2	95.7959	222	170.734	99.0027		141.289	-14.8891	275.177	-3.62553	179.414	-4.83797					1.4198	2.20537	1.55329	150.455	153.707	-3.25192
20230310	168.8	153.803		148	120.307	102.784	267	265.356	95.7961	186	170.795	99.0051		141.439	-14.941	275.47	-3.67145	179.605	-4.90573					1.41966	2.20566	1.55366	150.506	153.803	-3.29663
20230311	155.3	153.901		149	120.389	102.784	267	265.521	95.7962	176	171.025	98.9987		141.593	-14.9755	275.77	-3.71664	179.801	-4.88119					1.4206	2.20552	1.55253	150.56	153.901	-3.34085
20230312	148.1	153.979		136	120.542	102.774	206	265.663	95.796	138	171.266	98.9906		141.716	-14.941	276.009	-3.74858	179.957	-4.82976					1.42079	2.2039	1.55117	150.606	153.979	-3.37249
20230313	141.5	154.048		104	120.712	102.762	236	265.655	95.7988	160	171.356	98.9899		141.826	-14.8867	276.222	-3.82565	180.096	-4.85282					1.41954	2.20073	1.55031	150.603	154.048	-3.44448
20230314	136.9	154.057		115	120.723	102.761	212	265.493	95.8027	163	171.148	99.0014		141.839	-14.8873	276.249	-3.89352	180.113	-4.97769					1.41769	2.19919	1.55125	150.551	154.057	-3.50595
20230315	134.2	154.025		107	120.759	102.755	184	265.468	95.802	129	171.167	98.9985		141.79	-14.8324	276.152	-3.86882	180.05	-4.93378					1.41743	2.19833	1.55093	150.543	154.025	-3.48248
20230316	133.9	154.028		94	120.877	102.743	185	265.548	95.8004	122	171.318	98.9908		141.794	-14.7516	276.16	-3.84268	180.055	-4.85269					1.41729	2.19685	1.55003	150.569	154.028	-3.45904
20230317	132.9	154.026		72	120.899	102.74	139	265.608	95.799	85	171.395	98.9866		141.791	-14.7344	276.154	-3.8188	180.052	-4.80806					1.41767	2.19695	1.54969	150.588	154.026	-3.43747
20230318	139	154.052		44	120.888	102.743	187	265.638	95.7993	110	171.353	98.9903		141.831	-14.7665	276.233	-3.8354	180.103	-4.8581					1.41746	2.1974	1.55024	150.598	154.052	-3.4534
20230319	141.4	154.088		73	120.896	102.746	171	265.797	95.7972	98	171.479	98.9858		141.889	-14.7952	276.345	-3.81679	180.176	-4.82664					1.41841	2.19856	1.55002	150.65	154.088	-3.43804
20230320	154.8	154.139		83	121.044	102.734	279	266.101	95.7925	184	171.679	98.9783		141.969	-14.7391	276.501	-3.76119	180.278	-4.7695					1.41832	2.19839	1.54999	150.749	154.139	-3.38986
20230321	150.4	154.244		96	121.26	102.72	203	266.474	95.7883	130	171.868	98.9746		142.135	-14.6865	276.825	-3.73907	180.489	-4.77607					1.41735	2.19754	1.55045	150.871	154.244	-3.37387
20230322	157.7	154.295		104	121.54	102.695	206	266.899	95.781	155	172.14	98.9633		142.214	-14.5376	276.979	-3.6395	180.59	-4.67904					1.41632	2.19598	1.55048	151.009	154.295	-3.28584
20230323	150	154.381		112	121.841	102.671	274	267.427	95.7728	193	172.584	98.9453		142.35	-14.4073	277.243	-3.54049	180.762	-4.52424					1.41646	2.19489	1.54955	151.181	154.381	-3.19949
20230324	156.6	154.488		149	122.101	102.652	406	267.737	95.7702	247	172.86	98.9372		142.519	-14.3265	277.573	-3.54373	180.977	-4.48494					1.41571	2.19274	1.54886	151.282	154.488	-3.20624
20230325	159.4	154.562		153	122.279	102.64	332	267.91	95.7692	181	173.049	98.9317		142.635	-14.2711	277.799	-3.55981	181.124	-4.45801					1.4152	2.19096	1.54817	151.339	154.562	-3.22339
20230326	158.6	154.637		154	122.359	102.638	306	267.978	95.7705	186	173.151	98.9308		142.753	-14.2864	278.029	-3.61505	181.274	-4.48122					1.4151	2.1901	1.54766	151.361	154.637	-3.27613
20230327	157.5	154.735		158	122.452	102.636	325	267.997	95.7737	218	173.238	98.9319		142.907	-14.3134	278.328	-3.71176	181.469	-4.53559					1.41474	2.18859	1.54699	151.367	154.735	-3.36741
20230328	158.1	154.816		148	122.474	102.641	293	268.142	95.7737	206	173.353	98.9307		143.036	-14.3754	278.579	-3.74649	181.633	-4.55834					1.41543	2.18938	1.5468	151.414	154.816	-3.40199
20230329	147.3	154.876		158	122.542	102.639	265	268.422	95.7699	202	173.581	98.9224		143.129	-14.3833	278.761	-3.70893	181.751	-4.49538					1.4165	2.19044	1.54638	151.506	154.876	-3.37007
20230330	140	154.912		108	122.627	102.633	228	268.69	95.7654	126	173.732	98.9167		143.186	-14.3577	278.871	-3.65066	181.823	-4.45021					1.41674	2.19111	1.54658	151.593	154.912	-3.31843
20230331	129	154.96		75	122.712	102.628	179	268.833	95.7642	119	173.86	98.9129		143.262	-14.3444	279.021	-3.65126	181.921	-4.43066					1.41681	2.19076	1.54626	151.64	154.96	-3.32076
20230401	125.1	155.021		47	122.825	102.621	124	269.09	95.7609	73	173.967	98.9109		143.357	-14.3227	279.206	-3.62282	182.041	-4.43525					1.41639	2.19085	1.54679	151.723	155.021	-3.29707
20230402	126.7	155.057		44	122.937	102.613	192	269.159	95.7608	139	173.997	98.9114		143.414	-14.2784	279.316	-3.63658	182.113	-4.45665					1.41534	2.18941	1.54691	151.746	155.057	-3.31091
20230403	133.5	155.067		61	123.047	102.602	235	269.249	95.7592	157	174.036	98.91		143.43	-14.2113	279.347	-3.61465	182.133	-4.44594					1.41439	2.18819	1.54709	151.775	155.067	-3.2913
20230404	135.7	155.062		65	122.989	102.608	227	269.315	95.7577	129	174.079	98.9076		143.423	-14.2476	279.334	-3.58676	182.125	-4.41756					1.41541	2.18975	1.54708	151.797	155.062	-3.26575
20230405	136.7	155.07		53	122.953	102.612	277	269.241	95.7595	161	174.077	98.9081		143.435	-14.2791	279.356	-3.62078	182.139	-4.42654					1.41579	2.18978	1.54668	151.773	155.07	-3.29699
20230406	137.2	155.056		49	122.94	102.612	223	269.216	95.7595	150	174.036	98.9095		143.413	-14.276	279.315	-3.6154	182.112	-4.43502					1.41562	2.18982	1.5469	151.765	155.056	-3.29161
20230407	136.6	155.055		48	122.929	102.613	135	269.279	95.7582	82	174.066	98.9079		143.412	-14.2829	279.312	-3.59197	182.111	-4.41761					1.41599	2.19053	1.547	151.785	155.055	-3.27024
20230408	136.2	155.048		48	122.849	102.621	190	269.323	95.757	101	174.101	98.9056		143.401	-14.3318	279.291	-3.56902	182.097	-4.39086					1.41719	2.19231	1.54693	151.799	155.048	-3.2491
20230409	140.7	155.048		60	122.822	102.624	272	269.378	95.7558	161	174.178	98.9017		143.401	-14.3507	279.29	-3.54911	182.096	-4.34844					1.41814	2.19324	1.54657	151.817	155.048	-3.23096
20230410	140.3	155.062		90	122.888	102.618	362	269.526	95.7531	210	174.277	98.8975		143.423	-14.318	279.333	-3.51095	182.124	-4.30896					1.41818	2.19327	1.54654	151.865	155.062	-3.19671
20230411	144	155.065		109	122.921	102.615	351	269.729	95.7489	201	174.386	98.8921		143.428	-14.2982	279.343	-3.44185	182.131	-4.25225					1.41869	2.19433	1.54673	151.932	155.065	-3.1339
20230412	154.7	155.087		130	123.027	102.606	328	269.797	95.7483	222	174.488	98.8881		143.461	-14.2435	279.408	-3.4397	182.173	-4.21878					1.41828	2.19299	1.54623	151.954	155.087	-3.13267
20230413	160.4	155.132		150	123.121	102.6	466	269.923	95.7472	280	174.589	98.8855		143.532	-14.2209	279.546	-3.44223	182.263	-4.21038					1.41803	2.19235	1.54605	151.995	155.132	-3.13652
20230414	172.3	155.184		163	123.203	102.596	422	270.044	95.7466	271	174.69	98.8833		143.614	-14.2126	279.706	-3.45425	182.367	-4.20948					1.41791	2.19187	1.54584	152.034	155.184	-3.14927
20230415	176.9	155.259		177	123.282	102.594	390	270.093	95.7483	254	174.852	98.8794		143.733	-14.2282	279.937	-3.51634	182.518	-4.2					1.41831	2.19085	1.5447	152.05	155.259	-3.20854
20230416	179.1	155.339		183	123.441	102.584	381	270.236	95.7483	257	174.94	98.8796		143.86	-14.1934	280.184	-3.55058	182.679	-4.23649					1.41719	2.18919	1.54474	152.097	155.339	-3.24264
20230417	167.8	155.407		149	123.501	102.583	302	270.332	95.7488	193	174.964	98.8822		143.966	-14.215	280.391	-3.58779	182.814	-4.2939					1.4167	2.18889	1.54507	152.128	155.407	-3.27905
20230418	154.4	155.439		135	123.504	102.586	297	270.433	95.7478	189	175.011	98.8817		144.016	-14.2429	280.489	-3.58516	182.878	-4.3017					1.41705	2.18967	1.54523	152.161	155.439	-3.27779
20230419	148.3	155.497		103	123.548	102.586	259	270.562	95.7472	150	175.085	98.8812		144.108	-14.267	280.667	-3.60048	182.994	-4.32202					1.41714	2.18993	1.54532	152.203	155.497	-3.29389
20230420	148.4	155.539		103	123.57	102.587	281	270.712	95.7456	191	175.175	98.8791		144.174	-14.2913	280.796	-3.59125	183.078	-4.31674					1.41762	2.19076	1.54538	152.252	155.539	-3.28696
20230421	142	155.566		104	123.655	102.581	260	270.674	95.7474	158	175.178	98.8805		144.216	-14.2575	280.879	-3.63317	183.132	-4.3433					1.41667	2.18895	1.54514	152.24	155.566	-3.32631
20230422	142.7	155.602		97	123.685	102.58	232	270.666	95.7488	152	175.233	98.8797		144.273	-14.27	280.988	-3.67357	183.203	-4.35058					1.41677	2.18835	1.54461	152.237	155.602	-3.36461
20230423	136.7	155.639		83	123.644	102.588	238	270.764	95.7481	153	175.219	98.8825		144.332	-14.3336	281.103	-3.67794	183.278	-4.39723					1.41713	2.18987	1.54529	152.269	155.639	-3.36999
20230424	135.5	155.676		73	123.595	102.596	199	270.622	95.7525	133	175.101	98.8906		144.39	-14.4023	281.217	-3.76746	183.352	-4.50006					1.41674	2.18959	1.54552	152.223	155.676	-3.45342
20230425	132.3	155.693		73	123.553	102.601	243	270.334	95.7593	160	175.044	98.8945		144.417	-14.4466	281.269	-3.88756	183.386	-4.54912					1.41675	2.18799	1.54438	152.129	155.693	-3.56419
20230426	138.2	155.719		97	123.43	102.616	292	270.359	95.7597	186	175.022	98.8971		144.457	-14.556	281.348	-3.90578	183.438	-4.58787					1.41798	2.19038	1.54471	152.137	155.719	-3.5819
20230427	142.6	155.73		109	123.351	102.625	288	270.414	95.7589	195	175.022	98.8977		144.475	-14.6212	281.381	-3.89779	183.46	-4.59927					1.4189	2.19224	1.54503	152.155	155.73	-3.575
20230428	151.8	155.724		111	123.274	102.632	291	270.318	95.7608	201	174.992	98.8989		144.465	-14.6686	281.363	-3.92556	183.448	-4.60943					1.41954	2.19282	1.54475	152.124	155.724	-3.60023
20230429	158	155.72		111	123.164	102.643	302	270.395	95.759	161	175	98.8983		144.459	-14.7409	281.351	-3.89427	183.44	-4.60096					1.42087	2.1954	1.54511	152.149	155.72	-3.57139
20230430	155.8	155.723		102	123.085	102.652	330	270.436	95.7582	220	175.019	98.8975		144.464	-14.799	281.361	-3.88311	183.447	-4.59392					1.42194	2.19715	1.54518	152.162	155.723	-3.56128
20230501	150.1	155.748		104	123.079	102.654	306	270.556	95.7566	197	175.068	98.8964		144.503	-14.8257	281.437	-3.86611	183.496	-4.59269					1.4224	2.19822	1.54543	152.201	155.748	-3.54664
20230502	159.2	155.8		123	123.2	102.646	280	270.677	95.756	195	175.241	98.8906		144.585	-14.7909	281.597	-3.8781	183.601	-4.55306					1.42241	2.19705	1.5446	152.241	155.8	-3.55967
20230503	158.7	155.883		124	123.282	102.644	245	270.767	95.7571	167	175.304	98.8921		144.715	-14.8105	281.85	-3.93229	183.765	-4.60444					1.42197	2.19632	1.54456	152.27	155.883	-3.61266
20230504	164.7	155.96		138	123.348	102.644	272	271.077	95.7534	175	175.458	98.8888		144.837	-14.8367	282.087	-3.90326	183.92	-4.60117					1.42246	2.19766	1.54497	152.371	155.96	-3.58899
20230505	164.7	156.043		115	123.466	102.639	250	271.233	95.7531	160	175.54	98.8893		144.968	-14.8323	282.342	-3.93461	184.086	-4.64256					1.42177	2.19683	1.54514	152.422	156.043	-3.6211
20230506	154.5	156.144		116	123.436	102.65	305	271.148	95.7586	205	175.512	98.8965		145.127	-14.9467	282.653	-4.07035	184.289	-4.76233					1.42189	2.19668	1.54489	152.394	156.144	-3.75015
20230507	160	156.208		133	123.37	102.662	315	271.066	95.7628	204	175.496	98.901		145.228	-15.0511	282.85	-4.1661	184.417	-4.83746					1.42252	2.19718	1.54457	152.367	156.208	-3.84106
20230508	175.1	156.25		128	123.318	102.671	361	271.104	95.7635	212	175.542	98.901		145.294	-15.1251	282.976	-4.19552	184.5	-4.85489					1.4235	2.19842	1.54438	152.38	156.25	-3.86992
20230509	171.7	156.278		176	123.258	102.679	370	271.036	95.766	249	175.567	98.9013		145.338	-15.1927	283.064	-4.2493	184.557	-4.87091					1.42439	2.19894	1.54377	152.358	156.278	-3.92075
20230510	173.4	156.315		165	123.285	102.679	327	271.332	95.761	220	175.699	98.8968		145.396	-15.2074	283.176	-4.18261	184.63	-4.83723					1.42514	2.20085	1.5443	152.454	156.315	-3.86072
20230511	166.7	156.318		157	123.288	102.679	318	271.504	95.7575	227	175.789	98.8924		145.401	-15.2082	283.185	-4.12478	184.636	-4.79137					1.42584	2.2022	1.54449	152.51	156.318	-3.80747
20230512	152.2	156.332		145	123.312	102.678	327	271.589	95.7562	189	175.855	98.8898		145.423	-15.2041	283.228	-4.10931	184.664	-4.77017					1.42609	2.20245	1.54439	152.538	156.332	-3.79375
20230513	146.8	156.342		133	123.332	102.677	321	271.778	95.7526	212	175.973	98.8845		145.439	-15.2005	283.26	-4.05338	184.684	-4.71712					1.42683	2.20364	1.54443	152.6	156.342	-3.74254
20230514	142.7	156.339		131	123.315	102.678	280	271.745	95.7532	197	175.997	98.8831		145.435	-15.2093	283.251	-4.06214	184.679	-4.70094					1.42722	2.20367	1.54403	152.589	156.339	-3.75052
20230515	137.4	156.328		113	123.211	102.688	234	271.658	95.7546	159	175.923	98.8862		145.417	-15.2706	283.217	-4.08142	184.656	-4.7294					1.42782	2.20482	1.54418	152.56	156.328	-3.76786
20230516	137.3	156.281		106	123.112	102.694	262	271.518	95.7558	172	175.841	98.8876		145.342	-15.2949	283.071	-4.08152	184.562	-4.72501					1.4283	2.20545	1.54411	152.515	156.281	-3.76602
20230517	141	156.24		110	122.967	102.706	203	271.378	95.7573	127	175.707	98.8921		145.278	-15.3574	282.946	-4.08845	184.48	-4.75561					1.42889	2.20692	1.54449	152.469	156.24	-3.77075
20230518	154.1	156.2		120	122.803	102.72	248	271.323	95.757	181	175.603	98.8951		145.215	-15.4336	282.823	-4.06593	184.399	-4.77047					1.42996	2.20942	1.5451	152.451	156.2	-3.74833
20230519	168.5	156.201		142	122.712	102.729	305	271.063	95.7625	188	175.414	98.9047		145.216	-15.4969	282.826	-4.1591	184.402	-4.87411					1.42947	2.20893	1.54528	152.367	156.201	-3.83428
20230520	173.7	156.23		144	122.644	102.739	305	270.912	95.7668	174	175.353	98.9095		145.263	-15.5711	282.917	-4.24311	184.461	-4.93731					1.42978	2.20894	1.54495	152.317	156.23	-3.91299
20230521	167.3	156.297		146	122.625	102.746	262	270.699	95.7738	176	175.178	98.9222		145.368	-15.6455	283.122	-4.38794	184.595	-5.10115					1.42857	2.20754	1.54528	152.248	156.297	-4.04951
20230522	165.5	156.397		136	122.649	102.752	278	270.795	95.7755	183	175.392	98.917		145.526	-15.7198	283.429	-4.45759	184.795	-5.08821					1.43003	2.20788	1.54394	152.279	156.397	-4.11825
20230523	158.8	156.543		127	122.858	102.742	292	271.132	95.7737	187	175.584	98.9156		145.755	-15.7095	283.875	-4.48907	185.085	-5.1338					1.42916	2.20688	1.54417	152.389	156.543	-4.15387
20230524	168.2	156.74		151	123.096	102.733	322	271.586	95.7713	213	175.921	98.9097		146.065	-15.7253	284.479	-4.53208	185.479	-5.15362					1.42913	2.2063	1.5438	152.537	156.74	-4.20259
20230525	156	156.956		150	123.411	102.718	333	272.134	95.7676	202	176.351	98.9002		146.405	-15.7058	285.141	-4.56163	185.911	-5.14253					1.42897	2.20511	1.54314	152.716	156.956	-4.23985
20230526	152.9	157.138		145	123.66	102.707	281	272.488	95.7668	180	176.69	98.8934		146.692	-15.701	285.701	-4.6249	186.276	-5.14599					1.42884	2.20352	1.54218	152.831	157.138	-4.3071
20230527	161.1	157.319		137	123.948	102.692	315	272.89	95.7649	206	177.121	98.8821		146.978	-15.6691	286.257	-4.66958	186.639	-5.09988					1.42899	2.20165	1.5407	152.962	157.319	-4.35718
20230528	155.4	157.515		144	124.203	102.682	275	273.373	95.7619	195	177.474	98.8754		147.285	-15.672	286.856	-4.70034	187.029	-5.10887					1.42891	2.20102	1.54035	153.119	157.515	-4.39505
20230529	158.6	157.708		158	124.438	102.674	301	273.707	95.7619	243	177.811	98.8694		147.59	-15.6867	287.45	-4.78105	187.416	-5.12521					1.42891	2.19954	1.53931	153.228	157.708	-4.47979
20230530	166.5	157.907		166	124.696	102.663	351	274.301	95.7567	246	178.282	98.8571		147.904	-15.6912	288.06	-4.77634	187.814	-5.07526					1.42974	2.19976	1.53858	153.422	157.907	-4.48488
20230531	165.9	158.074		177	125.06	102.64	273	274.74	95.7536	223	178.649	98.8483		148.167	-15.595	288.573	-4.7936	188.148	-5.04877					1.42851	2.19686	1.53787	153.565	158.074	-4.5091
20230601	168.5	158.222		153	125.389	102.619	330	275.151	95.7504	217	179.044	98.8371		148.4	-15.506	289.027	-4.8009	188.444	-4.9885					1.42791	2.19438	1.53678	153.699	158.222	-4.52307
20230602	166.9	158.338		145	125.586	102.608	286	275.438	95.7486	180	179.227	98.8345		148.582	-15.4768	289.381	-4.81817	188.676	-5.00765					1.42713	2.19322	1.53681	153.793	158.338	-4.5449
20230603	169.3	158.402		143	125.666	102.605	312	275.474	95.7502	206	179.227	98.838		148.683	-15.4808	289.578	-4.87051	188.804	-5.07216					1.42622	2.19212	1.53701	153.805	158.402	-4.5974
20230604	173.2	158.416		144	125.745	102.598	410	275.51	95.7499	258	179.279	98.8363		148.705	-15.4401	289.622	-4.87256	188.832	-5.05892					1.42574	2.19101	1.53676	153.816	158.416	-4.60004
20230605	174.1	158.401		158	125.8	102.591	376	275.668	95.7461	229	179.529	98.8231		148.681	-15.3892	289.574	-4.80195	188.801	-4.91116					1.4271	2.19132	1.53551	153.868	158.401	-4.53262
20230606	176.9	158.379		185	125.811	102.589	377	275.715	95.7443	242	179.638	98.8165		148.647	-15.3625	289.507	-4.76403	188.758	-4.8313					1.42784	2.1915	1.53483	153.883	158.379	-4.49579
20230607	172.1	158.341		198	125.852	102.582	416	275.589	95.7455	249	179.682	98.8123		148.587	-15.3006	289.39	-4.76914	188.682	-4.76965					1.42773	2.18979	1.53376	153.842	158.341	-4.49879
20230608	173.6	158.305		181	125.847	102.579	315	275.37	95.7488	207	179.589	98.8149		148.531	-15.2723	289.281	-4.80894	188.61	-4.78307					1.42705	2.18814	1.53333	153.771	158.305	-4.53463
20230609	169.3	158.277		167	125.805	102.581	335	275.299	95.7493	234	179.608	98.8124		148.487	-15.2749	289.195	-4.80535	188.555	-4.74468					1.42767	2.18829	1.53277	153.747	158.277	-4.52991
20230610	166.1	158.221		148	125.849	102.572	374	275.14	95.7506	202	179.589	98.8102		148.398	-15.1949	289.023	-4.80359	188.442	-4.69807					1.42702	2.18626	1.53205	153.696	158.221	-4.52555
20230611	158.6	158.181		146	125.852	102.569	301	274.975	95.7526	197	179.526	98.811		148.335	-15.157	288.901	-4.82006	188.362	-4.69105					1.42648	2.18491	1.53167	153.642	158.181	-4.53913
20230612	150.7	158.123		114	125.721	102.577	257	274.578	95.7588	153	179.266	98.8206		148.244	-15.1936	288.723	-4.89919	188.247	-4.77078					1.42591	2.18404	1.53168	153.512	158.123	-4.61083
20230613	150.9	158.058		93	125.553	102.589	229	274.159	95.7652	171	178.984	98.8309		148.141	-15.2474	288.522	-4.97827	188.116	-4.85449					1.42556	2.1836	1.53175	153.376	158.058	-4.68201
20230614	148	158.01		117	125.419	102.599	264	273.6	95.7752	170	178.619	98.8462		148.065	-15.2946	288.374	-5.12334	188.019	-4.99949					1.42418	2.18148	1.53175	153.194	158.01	-4.81599
20230615	157.9	157.965		122	125.334	102.604	274	273.326	95.7794	177	178.436	98.8528		147.995	-15.312	288.238	-5.17358	187.93	-5.05229					1.42368	2.18078	1.53179	153.104	157.965	-4.86092
20230616	162.2	157.908		131	125.26	102.606	312	273.2	95.7799	210	178.397	98.8515		147.905	-15.3103	288.063	-5.15951	187.816	-5.01482					1.42421	2.18106	1.53141	153.063	157.908	-4.84475
20230617	163.2	157.87		130	125.241	102.605	318	273.29	95.7767	219	178.466	98.846		147.846	-15.2894	287.947	-5.09019	187.741	-4.94036					1.42498	2.18211	1.53133	153.093	157.87	-4.77774
20230618	169.4	157.87		160	125.189	102.611	347	273.351	95.7754	217	178.647	98.837		147.846	-15.3246	287.947	-5.06926	187.741	-4.84404					1.42701	2.1835	1.53012	153.112	157.87	-4.75809
20230619	174.3	157.886		182	125.219	102.609	425	273.6	95.7707	259	178.838	98.8284		147.87	-15.3181	287.995	-4.9982	187.772	-4.75746					1.4282	2.18497	1.52987	153.194	157.886	-4.69215
20230620	186	157.957		206	125.321	102.604	412	273.866	95.7677	254	179.055	98.8217		147.982	-15.3138	288.213	-4.97802	187.914	-4.71449					1.42877	2.18532	1.52951	153.28	157.957	-4.67675
20230621	182.2	158.087		217	125.422	102.604	425	274.14	95.7667	282	179.334	98.8152		148.187	-15.3623	288.611	-5.01425	188.174	-4.6975					1.42985	2.18574	1.52865	153.37	158.087	-4.7173
20230622	178.8	158.233		240	125.564	102.602	494	274.501	95.7644	332	179.655	98.8076		148.416	-15.3972	289.059	-5.03605	188.465	-4.67482					1.43078	2.18614	1.52794	153.487	158.233	-4.74516
20230623	175.2	158.38		228	125.701	102.6	469	274.748	95.7645	312	179.795	98.8089		148.648	-15.4369	289.51	-5.09892	188.759	-4.74939					1.43033	2.18572	1.52812	153.568	158.38	-4.8119
20230624	166.1	158.503		223	125.847	102.595	382	274.962	95.7645	277	179.948	98.8083		148.842	-15.4497	289.888	-5.14901	189.006	-4.79248					1.4299	2.1849	1.52801	153.637	158.503	-4.86552
20230625	159.9	158.636		204	125.912	102.599	319	274.975	95.7691	207	179.995	98.8134		149.051	-15.5241	290.295	-5.27719	189.271	-4.90128					1.42952	2.18386	1.52769	153.642	158.636	-4.99365
20230626	162.9	158.696		171	125.934	102.601	303	274.767	95.7757	213	179.904	98.8211		149.146	-15.5631	290.48	-5.40916	189.392	-5.00955					1.42856	2.18183	1.5273	153.574	158.696	-5.12181
20230627	156.2	158.706		156	125.921	102.604	257	274.562	95.7803	186	179.866	98.8236		149.162	-15.5811	290.51	-5.48975	189.412	-5.03969					1.42841	2.18044	1.52648	153.507	158.706	-5.19866
20230628	160.1	158.68		136	125.871	102.607	214	274.471	95.7813	143	179.767	98.827		149.121	-15.5915	290.432	-5.49544	189.361	-5.06622					1.42818	2.18057	1.52682	153.478	158.68	-5.20265
20230629	167.6	158.644		111	125.849	102.606	242	274.337	95.7828	166	179.715	98.8275		149.064	-15.5737	290.32	-5.5053	189.288	-5.05717					1.42802	2.17988	1.52651	153.434	158.644	-5.20998
20230630	163.9	158.591		106	125.74	102.613	261	274.159	95.7846	190	179.616	98.8294		148.981	-15.6003	290.159	-5.51412	189.182	-5.05651					1.42848	2.18037	1.52636	153.376	158.591	-5.21543
20230701	171	158.518		136	125.578	102.623	292	273.732	95.791	178	179.359	98.838		148.865	-15.643	289.933	-5.58786	189.035	-5.11871					1.42827	2.17977	1.52617	153.236	158.518	-5.28106
20230702	175.9	158.468		148	125.452	102.632	340	273.611	95.7917	204	179.271	98.8396		148.787	-15.6835	289.78	-5.5799	188.936	-5.11531					1.429	2.181	1.52624	153.197	158.468	-5.27077
20230703	179	158.423		154	125.307	102.643	327	273.411	95.7943	223	179.115	98.8448		148.717	-15.7412	289.643	-5.6043	188.847	-5.15313					1.42941	2.18193	1.52645	153.132	158.423	-5.29132
20230704	172.8	158.412		140	125.195	102.653	315	273.142	95.7996	204	179.011	98.8493		148.699	-15.8067	289.609	-5.68591	188.824	-5.19698					1.42986	2.18174	1.52584	153.044	158.412	-5.36774
20230705	159.8	158.39		135	125.06	102.665	320	273.178	95.7981	187	178.89	98.854		148.664	-15.8772	289.541	-5.65147	188.78	-5.23855					1.43043	2.18437	1.52707	153.056	158.39	-5.33397
20230706	162.9	158.379		145	125.071	102.663	269	273.332	95.7944	185	178.997	98.8481		148.648	-15.8606	289.509	-5.5879	188.759	-5.17149					1.43116	2.18541	1.52702	153.106	158.379	-5.27338
20230707	166.8	158.375		159	125.09	102.661	310	273.381	95.7932	192	179.068	98.8444		148.641	-15.8438	289.496	-5.56648	188.75	-5.12934					1.43151	2.18547	1.52668	153.122	158.375	-5.25292
20230708	165.9	158.341		177	125.137	102.653	348	273.381	95.7919	212	179.151	98.8384		148.586	-15.7816	289.39	-5.53192	188.681	-5.05107					1.43164	2.18465	1.52598	153.122	158.341	-5.2184
20230709	185.2	158.309		180	125.244	102.64	382	273.518	95.7879	245	179.271	98.8307		148.537	-15.6818	289.294	-5.45328	188.619	-4.95571					1.43138	2.18388	1.52572	153.167	158.309	-5.14251
20230710	196.9	158.289		191	125.318	102.631	367	273.529	95.7869	221	179.214	98.8324		148.505	-15.6139	289.232	-5.42917	188.578	-4.96579					1.43007	2.18268	1.52627	153.17	158.289	-5.11866
20230711	220.6	158.249		210	125.345	102.625	384	273.57	95.7846	232	179.296	98.8261		148.442	-15.5596	289.109	-5.37482	188.498	-4.88185					1.43042	2.18253	1.5258	153.184	158.249	-5.06527
20230712	199.7	158.231		196	125.342	102.624	322	273.512	95.7851	187	179.364	98.8217		148.413	-15.545	289.053	-5.37629	188.461	-4.82698					1.43099	2.18212	1.5249	153.165	158.231	-5.06567
20230713	209.7	158.224		152	125.392	102.618	271	273.597	95.7831	184	179.425	98.8184		148.403	-15.5056	289.032	-5.34002	188.448	-4.78807					1.43091	2.18194	1.52486	153.193	158.224	-5.03113
20230714	186.6	158.157		152	125.422	102.61	215	273.397	95.7849	134	179.4	98.8159		148.297	-15.4253	288.827	-5.34206	188.314	-4.73357					1.43037	2.17982	1.52395	153.128	158.157	-5.02948
20230715	184.5	158.096		127	125.43	102.604	267	273.214	95.7865	176	179.293	98.8177		148.201	-15.3649	288.639	-5.3442	188.192	-4.72849					1.42943	2.17821	1.52384	153.068	158.096	-5.02822
20230716	190.4	157.99		166	125.353	102.604	255	272.948	95.7883	176	179.184	98.8172		148.034	-15.3212	288.314	-5.32959	187.98	-4.67932					1.42943	2.17743	1.52329	152.981	157.99	-5.00883
20230717	185.9	157.853		159	125.192	102.609	295	272.595	95.7907	194	178.967	98.8202		147.818	-15.3067	287.893	-5.3139	187.705	-4.65522					1.42954	2.17742	1.52315	152.866	157.853	-4.98679
20230718	204	157.724		168	125.038	102.614	318	272.422	95.7897	197	178.951	98.8138		147.615	-15.2945	287.499	-5.24412	187.448	-4.53327					1.43117	2.17871	1.52233	152.81	157.724	-4.91456
20230719	195.1	157.598		165	124.926	102.615	301	272.175	95.7903	211	178.89	98.8097		147.417	-15.2564	287.111	-5.20214	187.196	-4.43665					1.43197	2.17869	1.52146	152.729	157.598	-4.86865
20230720	190.3	157.444		177	124.748	102.621	278	271.981	95.7888	175	178.808	98.8052		147.174	-15.2381	286.64	-5.11408	186.888	-4.32344					1.43336	2.18024	1.52108	152.666	157.444	-4.77836
20230721	178.5	157.262		150	124.578	102.624	257	271.416	95.7941	154	178.614	98.8046		146.888	-15.1881	286.081	-5.126	186.524	-4.24082					1.43375	2.17869	1.51957	152.482	157.262	-4.78016
20230722	180	157.126		140	124.381	102.633	238	271.37	95.7901	167	178.649	98.7952		146.673	-15.1988	285.664	-5.00386	186.252	-4.08196					1.43631	2.18177	1.51901	152.467	157.126	-4.65945
20230723	178	157.046		144	124.271	102.637	246	271.167	95.7915	167	178.605	98.7929		146.547	-15.2007	285.419	-4.99321	186.092	-4.02305					1.43722	2.18206	1.51825	152.4	157.046	-4.64555
20230724	170.3	157.039		140	124.271	102.637	249	271.153	95.7915	161	178.597	98.7929		146.537	-15.1947	285.399	-4.9913	186.079	-4.02068					1.43716	2.18195	1.51824	152.396	157.039	-4.64344
20230725	174.4	157.016		138	124.233	102.639	263	271.148	95.7908	179	178.608	98.7911		146.5	-15.1997	285.327	-4.96943	186.032	-3.99076					1.43769	2.18258	1.51812	152.394	157.016	-4.62193
20230726	172.6	156.994		153	124.159	102.645	220	271.112	95.7907	161	178.529	98.7938		146.466	-15.2302	285.26	-4.95952	185.988	-4.01085					1.43791	2.18359	1.51859	152.383	156.994	-4.61163
20230727	170.5	156.964		146	124.036	102.655	224	270.995	95.7922	149	178.479	98.7945		146.419	-15.2872	285.168	-4.9703	185.929	-4.00654					1.43894	2.18481	1.51835	152.344	156.964	-4.62017
20230728	173.4	156.981		165	123.962	102.664	235	271.011	95.7924	152	178.411	98.7988		146.444	-15.3524	285.218	-4.98106	185.961	-4.06006					1.43924	2.18625	1.51903	152.35	156.981	-4.63098
20230729	184.1	156.989		178	123.901	102.67	281	270.855	95.7961	211	178.403	98.7997		146.458	-15.4013	285.244	-5.04449	185.978	-4.07324					1.43988	2.18605	1.51822	152.299	156.989	-4.69038
20230730	179.7	156.998		181	123.855	102.676	314	270.652	95.8007	222	178.318	98.8044		146.472	-15.4416	285.272	-5.12507	185.997	-4.12852					1.43973	2.18524	1.51781	152.233	156.998	-4.76579
20230731	182.4	157.007		187	123.841		303	270.499	95.8044	206	178.222	98.8096		146.486	-15.4589	285.299	-5.18779	186.014	-4.1891					1.43912	2.18424	1.51776	152.183	157.007	-4.82457
20230801	179.9	157.005		180	123.836		298	270.438	95.8056	201	178.247	98.8083		146.482	-15.4604	285.292	-5.2064	186.009	-4.17331					1.43938	2.18385	1.51721	152.163	157.005	-4.84175
20230802	178.1	157.003		163	123.89		261	270.63	95.8014	179	178.37	98.8021		146.479	-15.4212	285.286	-5.13722	186.005	-4.10505					1.43974	2.18443	1.51724	152.225	157.003	-4.77732
20230803	167.7	157.012		145	124.014		301	270.907	95.7958	185	178.603	98.7911		146.494	-15.3453	285.314	-5.04946	186.024	-3.98918					1.44019	2.18449	1.51681	152.316	157.012	-4.69615
20230804	175.8	157.032		132	124.189		291	271.077	95.7929	200	178.658	98.7896		146.526	-15.2443	285.377	-5.01091	186.065	-3.98094					1.43859	2.18277	1.5173	152.371	157.032	-4.66132
20230805	180.8	157.091		131	124.353		271	271.274	95.7908	155	178.8	98.7858		146.618	-15.1853	285.556	-5.00137	186.181	-3.96461					1.43784	2.18148	1.51719	152.435	157.091	-4.65537
20230806	178.5	157.174		122	124.529		273	271.479	95.7895	188	178.94	98.7836		146.749	-15.1419	285.812	-5.01468	186.348	-3.97576					1.43693	2.18005	1.51716	152.502	157.174	-4.67195
20230807	174.5	157.253		126	124.852		268	271.534	95.7913	179	179.06	98.7821		146.873	-14.9928	286.052	-5.07533	186.505	-3.99181					1.43417	2.17484	1.51644	152.52	157.253	-4.73244
20230808	163.4	157.312		123	124.954		301	271.652	95.7909	186	179.156	98.7807		146.966	-14.9782	286.235	-5.09466	186.624	-4.0016					1.43378	2.17402	1.51629	152.559	157.312	-4.75348
20230809	157.7	157.322		102	125.101		271	271.564	95.7932	149	179.197	98.7793		146.982	-14.8868	286.265	-5.13531	186.644	-3.98972					1.43242	2.17076	1.51545	152.53	157.322	-4.79193
20230810	160	157.288		109	125.107		206	271.384	95.7958	157	179.148	98.7798		146.929	-14.8523	286.162	-5.16423	186.576	-3.98147					1.43196	2.16922	1.51486	152.471	157.288	-4.81718
20230811	157	157.205		105	125.167		199	271.23	95.796	126	179.008	98.782		146.797	-14.7351	285.905	-5.13287	186.409	-3.97035					1.43016	2.16695	1.51518	152.421	157.205	-4.78363
20230812	152.2	157.167		80	125.164		195	271.162	95.7961	106	178.901	98.7851		146.739	-14.7028	285.791	-5.1189	186.335	-3.98928					1.42934	2.16645	1.5157	152.399	157.167	-4.7687
20230813	154.4	157.09		101	125.137		275	270.762	95.8018	169	178.586	98.7963		146.616	-14.6502	285.552	-5.17967	186.179	-4.07826					1.42713	2.16373	1.51614	152.268	157.09	-4.82129
20230814	158.1	157.113		118	125.074		296	270.611	95.8058	172	178.463	98.8037		146.652	-14.7141	285.623	-5.25586	186.225	-4.16817					1.42686	2.16361	1.51634	152.219	157.113	-4.89343
20230815	162.1	157.131		122	124.975		277	270.293	95.8133	190	178.31	98.8122		146.681	-14.7977	285.678	-5.38551	186.261	-4.26915					1.42676	2.16277	1.51586	152.116	157.131	-5.01512
20230816	164.2	157.142		148	124.951		303	269.975	95.8206	219	178.09	98.8237		146.699	-14.825	285.714	-5.50843	186.284	-4.39864					1.42528	2.16065	1.51595	152.012	157.142	-5.13023
20230817	155.7	157.154		145	125		269	269.822	95.8244	170	178.014	98.8282		146.718	-14.8025	285.751	-5.57435	186.308	-4.45218					1.42411	2.15858	1.51574	151.962	157.154	-5.1923
20230818	154.4	157.17		124	125.06		261	269.94	95.8224	170	178.085	98.8255		146.742	-14.7756	285.798	-5.54868	186.339	-4.42969					1.42399	2.15848	1.51579	152	157.17	-5.16924
20230819	154.3	157.183		130	125.098		203	269.855	95.8247	141	178.003	98.8304		146.763	-14.7615	285.838	-5.59172	186.365	-4.48728					1.4229	2.15714	1.51601	151.973	157.183	-5.21008
20230820	149.8	157.153		101	125.014		192	269.636	95.8284	116	177.847	98.8365		146.717	-14.7924	285.748	-5.63871	186.307	-4.54104					1.42262	2.15685	1.51611	151.901	157.153	-5.25221
20230821	152.2	157.108		110	124.869		159	269.356	95.8327	118	177.649	98.8437		146.645	-14.8496	285.609	-5.69046	186.216	-4.60035					1.42269	2.15711	1.51622	151.81	157.108	-5.29784
20230822	154.4	157.088		114	124.904		201	269.085	95.8379	138	177.471	98.8515		146.614	-14.8077	285.549	-5.76574	186.177	-4.67606					1.42086	2.15433	1.51622	151.722	157.088	-5.36681
20230823	150.3	157.113		105	124.753		179	268.855	95.8438	113	177.282	98.8623		146.652	-14.9325	285.623	-5.87072	186.225	-4.80226					1.42106	2.15509	1.51654	151.647	157.113	-5.46594
20230824	147.3	157.17		92	124.671		193	268.885	95.8453	116	177.321	98.8636		146.743	-15.0411	285.799	-5.9183	186.34	-4.84046					1.42231	2.15675	1.51638	151.656	157.17	-5.51365
20230825	141.9	157.236		90	124.71		160	268.773	95.8502	96	177.299	98.8684		146.847	-15.0751	286.002	-6.0242	186.472	-4.9196					1.42169	2.15519	1.51593	151.62	157.236	-5.6163
20230826	142.2	157.277		91	124.685		191	268.816	95.8507	97	177.282	98.8715		146.911	-15.1288	286.126	-6.04973	186.553	-4.96975					1.42184	2.15597	1.51632	151.634	157.277	-5.64255
20230827	144.5	157.353		84	124.652		227	268.6	95.8583	103	177.167	98.8816		147.03	-15.2202	286.359	-6.20169	186.705	-5.10863					1.42129	2.1548	1.51608	151.564	157.353	-5.789
20230828	144.5	157.387		82	124.688		203	268.666	95.8581	121	177.148	98.8845		147.084	-15.2268	286.463	-6.21286	186.773	-5.15342					1.42073	2.15471	1.51662	151.585	157.387	-5.80154
20230829	145	157.406		90	124.671		200	268.567	95.8609	144	177.107	98.8876		147.114	-15.2554	286.522	-6.26654	186.812	-5.19489					1.42059	2.1542	1.51641	151.553	157.406	-5.85287
20230830	141.2	157.423		104	124.778		191	268.764	95.8573	137	177.241	98.8818		147.141	-15.1982	286.574	-6.21475	186.845	-5.14028					1.42045	2.15394	1.51638	151.617	157.423	-5.80555
20230831	142.5	157.428		89	124.868		214	268.899	95.8546	130	177.348	98.8768		147.15	-15.142	286.592	-6.17368	186.857	-5.08894					1.42028	2.15345	1.51622	151.661	157.428	-5.76754
20230901	138.3	157.385		86	124.915		209	268.964	95.8515	107	177.381	98.8727		147.082	-15.0712	286.46	-6.10751	186.771	-5.02762					1.42001	2.15318	1.51631	151.682	157.385	-5.70309
20230902	133.6	157.323		82	124.852		187	268.858	95.8515	117	177.296	98.8735		146.983	-15.057	286.268	-6.08171	186.645	-5.00928					1.42005	2.15341	1.51643	151.648	157.323	-5.67518
20230903	132.8	157.224		91	124.784		244	268.682	95.8517	138	177.189	98.8733		146.828	-15.014	285.966	-6.04394	186.449	-4.96636					1.41997	2.15319	1.51636	151.59	157.224	-5.63399
20230904	138.4	157.117		102	124.668		230	268.318	95.8556	149	176.97	98.8782		146.659	-14.9945	285.636	-6.06315	186.234	-4.97445					1.41952	2.15225	1.51618	151.472	157.117	-5.64538
20230905	145.2	156.992		115	124.463		286	267.885	95.8604	174	176.611	98.8891		146.462	-15.0201	285.251	-6.08814	185.983	-5.0392					1.41898	2.15233	1.51681	151.33	156.992	-5.66102
20230906	149.4	156.872		120	124.227		289	267.69	95.8602	178	176.447	98.8906		146.273	-15.0718	284.885	-6.03563	185.744	-5.00556					1.42035	2.15484	1.51712	151.267	156.872	-5.60498
20230907	163.3	156.75		132	124.036		306	267.416	95.8616	142	176.197	98.8963		146.081	-15.091	284.509	-6.00786	185.499	-5.01453					1.42054	2.15596	1.51771	151.178	156.75	-5.57183
20230908	163.4	156.615		117	123.888		286	267.195	95.8615	164	175.984	98.8994		145.869	-15.0693	284.098	-5.94973	185.231	-4.99222					1.42051	2.15675	1.51829	151.105	156.615	-5.50993
20230909	163.7	156.516		133	123.745		302	266.934	95.8635	205	175.808	98.9027		145.713	-15.076	283.793	-5.94062	185.032	-4.98513					1.42073	2.15713	1.51833	151.021	156.516	-5.4956
20230910	166.2	156.434		173	123.548		362	266.742	95.8646	261	175.666	98.9052		145.584	-15.136	283.541	-5.92462	184.868	-4.97771					1.42184	2.15902	1.51847	150.958	156.434	-5.47593
20230911	178.8	156.371		190	123.378		319	266.784	95.8613	215	175.677	98.9011		145.484	-15.1949	283.348	-5.84594	184.742	-4.90696					1.42389	2.16233	1.51861	150.971	156.371	-5.39952
20230912	155.5	156.336		145	123.321		268	266.649	95.863	146	175.586	98.9037		145.43	-15.2027	283.242	-5.85814	184.673	-4.92036					1.42382	2.16225	1.51862	150.928	156.336	-5.40876
20230913	144.4	156.309		131	123.227		226	266.564	95.8638	161	175.444	98.9093		145.386	-15.2414	283.157	-5.85991	184.618	-4.96903					1.42374	2.16319	1.51937	150.9	156.309	-5.40878
20230914	146.9	156.285		134	123.121		246	266.51	95.8642	181	175.411	98.9097		145.35	-15.2935	283.086	-5.85551	184.571	-4.96286					1.42471	2.16462	1.51934	150.882	156.285	-5.40335
20230915	140.6	156.268		109	123.005		212	266.397	95.866	139	175.367	98.9109		145.323	-15.3571	283.034	-5.87787	184.537	-4.96912					1.42569	2.16573	1.51908	150.846	156.268	-5.42299
20230916	141.9	156.295		88	122.978		210	266.581	95.863	124	175.559	98.9027		145.365	-15.4003	283.115	-5.84013	184.59	-4.89259					1.42756	2.16771	1.51847	150.905	156.295	-5.38972
20230917	146.1	156.325		89	123.058		208	266.833	95.8585	149	175.732	98.8957		145.411	-15.3728	283.206	-5.78131	184.649	-4.82959					1.42804	2.16836	1.51841	150.988	156.325	-5.33714
20230918	156	156.396		127	123.186		262	267.153	95.8542	181	175.975	98.8874		145.524	-15.3496	283.424	-5.74085	184.792	-4.77101					1.42853	2.16869	1.51813	151.092	156.396	-5.30387
20230919	167.6	156.431		149	123.321		299	267.071	95.8573	185	175.951	98.8906		145.578	-15.2892	283.531	-5.80532	184.861	-4.8202					1.42678	2.16567	1.51788	151.065	156.431	-5.36546
20230920	156.8	156.496		170	123.395		310	267.277	95.8552	214	176.14	98.8847		145.681	-15.2979	283.73	-5.79902	184.991	-4.78483					1.42745	2.16603	1.51741	151.132	156.496	-5.36341
20230921	169.4	156.556		194	123.545		357	267.732	95.8475	269	176.452	98.8725		145.776	-15.2502	283.917	-5.70074	185.113	-4.67867					1.42824	2.16707	1.5173	151.28	156.556	-5.27597
20230922	177	156.683		200	123.685		323	267.918	95.8482	230	176.556	98.8744		145.976	-15.2702	284.305	-5.764	185.366	-4.75268					1.42747	2.16613	1.51747	151.341	156.683	-5.34181
20230923	174.1	156.827		196	123.699		348	267.625	95.86	252	176.4	98.8904		146.203	-15.3926	284.748	-6.01352	185.655	-4.98495					1.42605	2.16352	1.51715	151.246	156.827	-5.58176
20230924	174.8	156.922		176	123.721		330	267.616	95.8637	223	176.482	98.8917		146.352	-15.464	285.039	-6.11228	185.844	-5.03765					1.42646	2.16307	1.51639	151.243	156.922	-5.67923
20230925	171.1	157.006		169	123.745		272	267.564	95.868	197	176.468	98.8971		146.484	-15.5231	285.295	-6.21488	186.012	-5.13034					1.42606	2.16222	1.51622	151.226	157.006	-5.77976
20230926	165.7	157.06		140	123.69		278	267.471	95.872	195	176.425	98.9024		146.57	-15.61	285.462	-6.30246	186.121	-5.20947					1.42634	2.16242	1.51606	151.196	157.06	-5.86465
20230927	156.7	157.104		133	123.595		259	267.301	95.8774	183	176.252	98.9136		146.638	-15.7146	285.595	-6.4055	186.207	-5.34623					1.42605	2.16273	1.51659	151.14	157.104	-5.96332
20230928	148.4	157.172		116	123.43		242	267.088	95.8846	137	176.068	98.9267		146.745	-15.8881	285.804	-6.54853	186.343	-5.51377					1.42646	2.16388	1.51695	151.071	157.172	-6.10093
20230929	155.5	157.245		103	123.351		196	266.868	95.8922	136	176.038	98.9324		146.861	-16.0084	286.029	-6.69874	186.49	-5.60433					1.42714	2.16349	1.51597	150.999	157.245	-6.2458
20230930	159.5	157.273		117	123.285		308	266.74	95.8961	175	176.005	98.9357		146.905	-16.0786	286.115	-6.77198	186.546	-5.65051					1.42763	2.1636	1.51552	150.957	157.273	-6.316
20231001	161.5	157.296		151	123.329		265	266.74	95.897	176	176.011	98.9367		146.941	-16.0692	286.185	-6.7947	186.592	-5.67057					1.42717	2.16283	1.51547	150.957	157.296	-6.33874
20231002	157.7	157.278		168	123.547		300	266.945	95.8918	188	176.113	98.9306		146.913	-15.9051	286.131	-6.70542	186.557	-5.59834					1.42547	2.16068	1.51576	151.024	157.278	-6.25427
20231003	153.8	157.221		144	123.719		321	267.033	95.8877	204	176.165	98.9247		146.824	-15.7363	285.957	-6.61761	186.443	-5.51239					1.42391	2.15838	1.51581	151.053	157.221	-6.16859
20231004	155.1	157.156		154	123.881		236	267.144	95.8828	167	176.296	98.9143		146.72	-15.5663	285.755	-6.513	186.311	-5.37576					1.4231	2.15645	1.51532	151.089	157.156	-6.06679
20231005	156.1	157.093		159	124.078		306	267.116	95.8811	197	176.338	98.9086		146.621	-15.3755	285.562	-6.45955	186.186	-5.28924					1.42119	2.15282	1.5148	151.08	157.093	-6.01295
20231006	155.3	157.047		158	124.286		320	267.239	95.8767	206	176.411	98.9024		146.55	-15.1918	285.423	-6.3709	186.095	-5.20363					1.4194	2.15019	1.51486	151.12	157.047	-5.92752
20231007	157	157.01		134	124.499		292	267.607	95.8672	203	176.674	98.887		146.491	-15.013	285.309	-6.20456	186.021	-5.02456					1.41908	2.14948	1.51469	151.24	157.01	-5.77045
20231008	156.8	156.979		144	124.712		298	267.824	95.8613	201	176.885	98.8746		146.443	-14.8388	285.214	-6.09732	185.959	-4.87927					1.41835	2.14754	1.51411	151.311	156.979	-5.66882
20231009	165.2	156.937		153	124.894		305	267.812	95.86	206	176.93	98.87		146.376	-14.6761	285.084	-6.05852	185.874	-4.81186					1.41665	2.14432	1.51366	151.307	156.937	-5.63017
20231010	163.9	156.895		132	124.992		300	267.548	95.8642	198	176.837	98.8723		146.309	-14.5701	284.954	-6.10842	185.789	-4.81835					1.41479	2.14053	1.51296	151.221	156.895	-5.67395
20231011	157.5	156.861		145	125.037		261	267.313	95.8681	185	176.769	98.8738		146.256	-14.5085	284.851	-6.15715	185.722	-4.82074					1.41374	2.13788	1.51221	151.144	156.861	-5.71716
20231012	156.4	156.833		137	125.023		255	267.141	95.8708	163	176.641	98.8786		146.212	-14.4921	284.765	-6.18883	185.666	-4.86062					1.41287	2.13674	1.51234	151.088	156.833	-5.74483
20231013	148.4	156.811		113	124.952		217	266.578	95.8824	144	176.348	98.8921		146.177	-14.5201	284.697	-6.36427	185.621	-4.99561					1.41133	2.13345	1.51165	150.904	156.811	-5.90629
20231014	147.4	156.782		111	124.844		200	266.136	95.891	148	176.08	98.9041		146.132	-14.5678	284.609	-6.49065	185.564	-5.11135					1.4104	2.13176	1.51146	150.76	156.782	-6.02174
20231015	143.8	156.789		104	124.695		233	265.783	95.8991	155	175.858	98.9157		146.143	-14.676	284.631	-6.62181	185.579	-5.23825					1.4103	2.13147	1.51136	150.645	156.789	-6.1439
20231016	143.1	156.828		97	124.529		213	265.454	95.9079	141	175.626	98.9297		146.204	-14.8255	284.75	-6.77628	185.656	-5.40256					1.41032	2.13167	1.51148	150.538	156.828	-6.28985
20231017	136.4	156.917		74	124.458		181	265.35	95.9136	120	175.576	98.9373		146.344	-14.9548	285.022	-6.90208	185.833	-5.51972					1.41072	2.13203	1.51131	150.504	156.917	-6.41275
20231018	134.3	157.092		66	124.428		154	265.259	95.9222	113	175.537	98.9492		146.619	-15.1351	285.558	-7.10874	186.183	-5.71785					1.41075	2.13182	1.51112	150.474	157.092	-6.6172
20231019	127.7	157.312		57	124.49		196	265.277	95.9301	135	175.611	98.958		146.966	-15.2937	286.235	-7.32199	186.624	-5.90125					1.41064	2.13091	1.51059	150.48	157.312	-6.83186
20231020	124.6	157.496		67	124.552		142	265.231	95.938	86	175.566	98.9707		147.256	-15.4178	286.798	-7.51979	186.991	-6.10978					1.40958	2.12948	1.51072	150.465	157.496	-7.03024
20231021	121.4	157.686		68	124.612		154	265.246	95.9449	116	175.617	98.979		147.556	-15.5496	287.383	-7.70274	187.373	-6.27371					1.40932	2.12859	1.51037	150.47	157.686	-7.21598
20231022	117.6	157.896		55	124.414		160	265.343	95.9507	85	175.686	98.9874		147.887	-15.8724	288.027	-7.87575	187.793	-6.44691					1.41211	2.13275	1.51032	150.502	157.896	-7.39461
20231023	120.8	158.15		34	124.912		130	265.423	95.9584	64	175.752	98.9985		148.286	-15.7626	288.805	-8.09612	188.3	-6.6636					1.407	2.12487	1.51021	150.528	158.15	-7.62205
20231024	119.8	158.386		39	125.441		82	265.617	95.9629	68	175.877	99.0055		148.658	-15.6174	289.528	-8.25872	188.772	-6.83065					1.40207	2.11746	1.51024	150.591	158.386	-7.79462
20231025	124.4	158.575		33	125.929		155	265.683	95.9686	100	175.924	99.0139		148.956	-15.4589	290.109	-8.4195	189.15	-6.99253					1.39701	2.10979	1.51022	150.613	158.575	-7.96232
20231026	124.9	158.659		54	126.236		166	265.606	95.9735	108	175.894	99.0201		149.088	-15.328	290.366	-8.52727	189.318	-7.09056					1.39338	2.10405	1.51003	150.588	158.659	-8.07139
20231027	125.9	158.692		58	126.323		162	265.54	95.9762	107	175.838	99.0249		149.14	-15.2986	290.467	-8.58177	189.384	-7.15258					1.39197	2.10207	1.51014	150.566	158.692	-8.1258
20231028	126.3	158.699		49	126.4		222	265.464	95.9782	119	175.763	99.0292		149.152	-15.254	290.491	-8.61511	189.399	-7.1994					1.39053	2.10019	1.51035	150.541	158.699	-8.15803
20231029	133.3	158.656		58	126.422		189	265.356	95.979	120	175.807	99.0244		149.083	-15.2001	290.356	-8.61012	189.311	-7.13329					1.39064	2.09897	1.50936	150.506	158.656	-8.14953
20231030	137.7	158.611		73	126.416		202	265.164	95.9816	116	175.676	99.0286		149.012	-15.1637	290.219	-8.63328	189.222	-7.15896					1.38966	2.09754	1.50939	150.443	158.611	-8.1676
20231031	145.1	158.562		107	126.37		213	268.449	95.9066	168	177.942	98.9108		148.935	-15.1508	290.068	-7.45292	189.123	-5.91192					1.40811	2.12431	1.50863	151.514	158.562	-7.04717
20231101	156.2	158.501		115	126.351		262	268.534	95.9024	180	178.003	98.9044		148.838	-15.1088	289.88	-7.36379	189.001	-5.8192					1.4088	2.12531	1.5086	151.542	158.501	-6.95838
20231102	155.9	158.461		122	126.405		276	268.699	95.8973	183	178.11	98.8968		148.775	-15.036	289.758	-7.26783	188.921	-5.72276					1.40903	2.12569	1.50861	151.596	158.461	-6.86479
20231103	153.6	158.444		121	126.466		267	268.874	95.8929	180	178.285	98.8871		148.749	-14.9805	289.706	-7.1909	188.888	-5.61325					1.40975	2.12606	1.50811	151.653	158.444	-6.79092
20231104	152.7	158.457		92	126.652		207	269.055	95.8894	144	178.384	98.8829		148.77	-14.8671	289.747	-7.14141	188.914	-5.57418					1.40845	2.12436	1.50829	151.712	158.457	-6.74512
20231105	152.2	158.527		91	126.836		200	269.082	95.8914	136	178.466	98.8828		148.88	-14.8067	289.961	-7.20059	189.054	-5.6005					1.40706	2.1215	1.50775	151.721	158.527	-6.80605
20231106	143.6	158.566		77	127.025		216	269.167	95.891	133	178.518	98.8824		148.941	-14.7151	290.081	-7.20976	189.132	-5.61208					1.40538	2.11901	1.50779	151.748	158.566	-6.81755
20231107	142.5	158.655		78	127.203		206	269.222	95.8931	163	178.6	98.8832		149.081	-14.6753	290.353	-7.27764	189.309	-5.65691					1.40406	2.11648	1.5074	151.766	158.655	-6.88818
20231108	143.1	158.818		113	127.195		258	269.307	95.8973	143	178.597	98.8925		149.338	-14.828	290.854	-7.40838	189.636	-5.8211					1.40413	2.11728	1.5079	151.794	158.818	-7.02405
20231109	136.1	158.994		99	127.236		215	269.586	95.8977	138	178.712	98.8967		149.616	-14.9585	291.395	-7.48419	189.988	-5.93518					1.40458	2.1188	1.50849	151.885	158.994	-7.10911
20231110	141.1	159.162		94	127.279		189	269.915	95.8967	143	178.819	98.9007		149.88	-15.0791	291.909	-7.53457	190.324	-6.04478					1.40493	2.12065	1.50943	151.992	159.162	-7.16961
20231111	138.7	159.342		81	127.348		199	270.118	95.899	115	179.047	98.8995		150.164	-15.1941	292.462	-7.64009	190.684	-6.10318					1.40596	2.1211	1.50865	152.058	159.342	-7.28379
20231112	134.4	159.56		82	127.532		161	270.362	95.9017	117	179.321	98.898		150.507	-15.2656	293.131	-7.76768	191.121	-6.17411					1.40609	2.11996	1.5077	152.138	159.56	-7.42238
20231113	130	159.772		73	127.838		193	270.827	95.8994	120	179.512	98.9003		150.841	-15.2496	293.781	-7.8131	191.544	-6.28147					1.40421	2.11851	1.50868	152.29	159.772	-7.48232
20231114	121.2	160.011		60	128.085		115	271.156	95.9011	65	179.767	98.901		151.217	-15.2974	294.514	-7.93086	192.022	-6.38198					1.4035	2.117	1.50837	152.397	160.011	-7.61405
20231115	116.4	160.24		33	128.37		96	271.584	95.9002	67	180.033	98.9006		151.578	-15.3108	295.215	-8.00494	192.479	-6.46644					1.40245	2.11563	1.50852	152.536	160.24	-7.70348
20231116	115.3	160.434		30	128.647		123	272.312	95.8915	76	180.441	98.8912		151.884	-15.2992	295.811	-7.94388	192.868	-6.44319					1.40261	2.11675	1.50915	152.774	160.434	-7.66015
20231117	116.9	160.584		26	128.866		72	272.679	95.8891	39	180.641	98.8896		152.119	-15.2863	296.27	-7.96254	193.167	-6.48455					1.40178	2.116	1.50951	152.894	160.584	-7.69006
20231118	124.2	160.667		32	128.967		139	272.94	95.8865	91	180.808	98.886		152.25	-15.2924	296.525	-7.9538	193.333	-6.47842					1.40197	2.11635	1.50955	152.978	160.667	-7.68822
20231119	136.8	160.754		68	129.074		152	273.153	95.8851	76	180.995	98.8817		152.387	-15.2986	296.792	-7.96469	193.507	-6.46636					1.40225	2.11625	1.50918	153.048	160.754	-7.70568
20231120	152.8	160.856		96	129.099		275	273.337	95.8849	201	181.142	98.8801		152.548	-15.3716	297.105	-7.99975	193.711	-6.4884					1.40313	2.11727	1.50896	153.108	160.856	-7.74776
20231121	167.3	160.938		153	129.211		299	273.433	95.8858	196	181.222	98.8807		152.677	-15.3695	297.356	-8.04525	193.875	-6.52645					1.40253	2.11617	1.50883	153.139	160.938	-7.79842
20231122	184.8	161.052		160	129.312		356	273.384	95.8911	240	181.23	98.8866		152.857	-15.4031	297.707	-8.17032	194.104	-6.63251					1.40149	2.11413	1.50849	153.123	161.052	-7.92901
20231123	189.3	161.086		186	129.293		351	273.184	95.8966	235	181.074	98.8962		152.911	-15.4454	297.812	-8.26986	194.173	-6.74587					1.40049	2.1129	1.50868	153.058	161.086	-8.02846
20231124	173.5	161.116		167	129.271		300	272.871	95.9045	221	180.959	98.9035		152.958	-15.486	297.905	-8.40317	194.233	-6.83405					1.39984	2.11084	1.50792	152.956	161.116	-8.16042
20231125	171.9	161.126		177	129.181		317	272.822	95.9059	231	180.962	98.9039		152.973	-15.5535	297.934	-8.42877	194.252	-6.84184					1.40084	2.11194	1.50762	152.94	161.126	-8.18608
20231126	175.5	161.122		171	129.156		331	272.674	95.909	232	180.868	98.9083		152.967	-15.5662	297.922	-8.47481	194.244	-6.88611					1.40039	2.1112	1.50758	152.892	161.122	-8.23048
20231127	175.1	161.175		158	129.151		293	272.707	95.9102	212	180.811	98.914		153.05	-15.6155	298.084	-8.51333	194.35	-6.96612					1.4	2.11154	1.50824	152.902	161.175	-8.27236
20231128	176.7	161.208		150	129.164		308	272.721	95.9111	227	180.685	98.9221		153.103	-15.6358	298.187	-8.54045	194.417	-7.0632					1.39888	2.11142	1.50937	152.907	161.208	-8.30159
20231129	166	161.232		161	129.173		270	272.477	95.9173	188	180.496	98.9327		153.141	-15.6512	298.26	-8.64462	194.465	-7.18319					1.39732	2.1094	1.5096	152.827	161.232	-8.40492
20231130	162	161.265		148	129.14		270	272.488	95.9182	212	180.408	98.9389		153.192	-15.7006	298.359	-8.67131	194.529	-7.25911					1.397	2.11002	1.51039	152.831	161.265	-8.43368
20231201	157.6	161.308		123	129.145		226	272.534	95.9188	160	180.427	98.9404		153.261	-15.735	298.494	-8.69685	194.617	-7.29103					1.39709	2.11029	1.51049	152.846	161.308	-8.46233
20231202	144	161.381		100	129.244		178	272.951	95.9125	128	180.721	98.9299		153.375	-15.7333	298.716	-8.62525	194.762	-7.20937					1.39829	2.1119	1.51035	152.982	161.381	-8.3989
20231203	135.2	161.424		104	129.419		212	273.238	95.9078	161	180.926	98.9221		153.443	-15.6563	298.848	-8.56934	194.848	-7.14489					1.39798	2.11127	1.51022	153.076	161.424	-8.34813
20231204	133.9	161.474		113	129.605		288	273.236	95.9097	233	181.014	98.9205		153.521	-15.5781	299.001	-8.61703	194.947	-7.14741					1.39665	2.10821	1.50947	153.075	161.474	-8.39889
20231205	137.5	161.539		107	129.751		274	273.227	95.9123	196	181.104	98.9197		153.624	-15.5402	299.201	-8.68112	195.078	-7.1634					1.39579	2.10579	1.50868	153.072	161.539	-8.46705
20231206	126.1	161.605		134	129.742		238	273.132	95.9168	185	181.082	98.9244		153.729	-15.6029	299.405	-8.77518	195.211	-7.23769					1.3957	2.10518	1.50833	153.041	161.605	-8.56461
20231207	130.6	161.673		125	129.636		247	272.767	95.9271	172	180.855	98.9394		153.835	-15.7306	299.612	-8.95974	195.346	-7.41811					1.3951	2.10411	1.50821	152.922	161.673	-8.75079
20231208	128.6	161.718		113	129.586		255	272.737	95.9294	179	180.792	98.945		153.906	-15.8014	299.749	-9.01166	195.436	-7.49292					1.39515	2.10467	1.50857	152.912	161.718	-8.80555
20231209	124.1	161.792		127	129.603		241	272.581	95.9355	188	180.688	98.9542		154.022	-15.8542	299.975	-9.13229	195.583	-7.61587					1.39417	2.1032	1.50857	152.861	161.792	-8.93016
20231210	122.8	161.847		123	129.616		233	272.433	95.9408	186	180.671	98.9581		154.109	-15.8931	300.146	-9.23323	195.694	-7.67678					1.39389	2.10184	1.50789	152.813	161.847	-9.03401
20231211	122.1	161.915		92	129.553		157	272.274	95.9468	93	180.526	98.9691		154.216	-15.9921	300.354	-9.34887	195.83	-7.81473					1.39345	2.10163	1.50823	152.761	161.915	-9.15348
20231212	122.3	161.968		96	129.534		189	272.386	95.9463	141	180.556	98.9705		154.3	-16.0501	300.517	-9.36067	195.936	-7.84937					1.39389	2.10281	1.5086	152.798	161.968	-9.17001
20231213	130.7	162.02		110	129.619		192	272.542	95.9448	148	180.614	98.9705		154.382	-16.0399	300.677	-9.35712	196.041	-7.86921					1.39342	2.10264	1.50898	152.849	162.02	-9.17143
20231214	143.4	162.096		117	129.712		191	272.605	95.9462	130	180.641	98.9734		154.501	-16.0441	300.908	-9.4058	196.191	-7.92601					1.39263	2.10162	1.5091	152.869	162.096	-9.22623
20231215	139.8	162.141		114	129.811		233	272.647	95.9469	162	180.647	98.9756		154.571	-16.0188	301.046	-9.43362	196.281	-7.96537					1.39161	2.10034	1.50928	152.883	162.141	-9.25776
20231216	144.3	162.179		124	129.866		272	272.471	95.9521	168	180.471	98.9864		154.631	-16.0159	301.163	-9.52697	196.357	-8.09037					1.38968	2.0981	1.50978	152.826	162.179	-9.35301
20231217	149.7	162.204		112	129.926		287	272.427	95.954	224	180.323	98.9952		154.672	-15.9989	301.242	-9.56525	196.409	-8.1898					1.38789	2.09679	1.51077	152.811	162.204	-9.39305
20231218	156.3	162.249		138	129.874		349	272.277	95.959	227	180.222	99.0027		154.742	-16.0708	301.379	-9.65636	196.498	-8.28312					1.38767	2.09647	1.51079	152.762	162.249	-9.48683
20231219	173.5	162.317		150	129.745		364	272.033	95.9668	248	179.975	99.0188		154.849	-16.2117	301.587	-9.79939	196.633	-8.47164					1.38714	2.09667	1.5115	152.683	162.317	-9.63399
20231220	189.1	162.361		149	129.592		358	271.704	95.9757	266	179.767	99.0318		154.919	-16.3488	301.724	-9.94931	196.723	-8.61904					1.38718	2.09662	1.51142	152.576	162.361	-9.78583
20231221	187.4	162.438		152	129.449		336	271.266	95.9881	249	179.548	99.047		155.039	-16.5054	301.957	-10.1642	196.875	-8.80108					1.38701	2.09554	1.51083	152.433	162.438	-10.0049
20231222	180.7	162.505		148	129.197		300	270.77	96.0016	199	179.129	99.0719		155.145	-16.7247	302.163	-10.3895	197.009	-9.07599					1.38647	2.09579	1.51159	152.271	162.505	-10.2337
20231223	168.6	162.578		138	129.011		289	270.205	96.0168	183	178.825	99.0915		155.261	-16.907	302.389	-10.6431	197.157	-9.29821					1.38612	2.09444	1.51101	152.087	162.578	-10.4914
20231224	177.4	162.677		117	128.849		285	269.953	96.0261	193	178.532	99.112		155.417	-17.0943	302.692	-10.816	197.355	-9.53767					1.38558	2.09511	1.51208	152.005	162.677	-10.6724
20231225	161.3	162.802		113	128.71		236	269.814	96.0339	154	178.392	99.1261		155.613	-17.2884	303.074	-10.9743	197.603	-9.72226					1.386	2.0963	1.51248	151.959	162.802	-10.8424
20231226	149.1	162.904		110	128.641		199	269.91	96.0355	126	178.392	99.1318		155.773	-17.4176	303.387	-11.0345	197.807	-9.81529					1.38674	2.09816	1.51302	151.991	162.904	-10.913
20231227	144.5	162.989		76	128.707		216	270.112	96.0341	126	178.46	99.1331		155.908	-17.4468	303.649	-11.0445	197.978	-9.85857					1.38656	2.09866	1.51357	152.057	162.989	-10.9324
20231228	141.8	163.067		95	128.811		182	270.562	96.027	120	178.666	99.1269		156.031	-17.4451	303.888	-10.9668	198.134	-9.82591					1.38704	2.10046	1.51435	152.203	163.067	-10.864
20231229	138.2	163.119		83	128.992		198	271.079	96.0174	127	178.986	99.1135		156.113	-17.3729	304.049	-10.8435	198.239	-9.71182					1.38758	2.10152	1.51453	152.372	163.119	-10.7476
20231230	135.1	163.198		65	129.299		127	271.622	96.0083	83	179.252	99.1044		156.237	-17.2422	304.291	-10.7361	198.397	-9.64968					1.38634	2.10073	1.51531	152.549	163.198	-10.6496
20231231	141.4	163.222		52	129.496		202	271.885	96.0033	104	179.493	99.0935		156.275	-17.1356	304.363	-10.6709	198.444	-9.54965					1.38609	2.09956	1.51474	152.634	163.222	-10.5874
20240101	131.2	163.223		55	129.63		194	272.041	95.9999	109	179.74	99.0811		156.276	-17.0506	304.367	-10.6206	198.446	-9.42639					1.38656	2.09859	1.51353	152.685	163.223	-10.5376
20240102	137.4	163.196		68	129.748		199	272.044	95.9989	119	179.729	99.0802		156.234	-16.953	304.285	-10.5957	198.393	-9.40765					1.38521	2.09671	1.51364	152.686	163.196	-10.5101
20240103	135.5	163.197		59	129.852		192	272.055	95.9987	134	179.707	99.0813		156.236	-16.8871	304.288	-10.5929	198.395	-9.41945					1.38394	2.09511	1.51388	152.69	163.197	-10.5074
20240104	142.2	163.249		100	129.86		305	272.074	96.0002	197	179.825	99.0782		156.318	-16.9254	304.447	-10.6335	198.499	-9.40761					1.38475	2.09513	1.513	152.696	163.249	-10.5532
20240105	147.6	163.272		119	129.838		292	272.186	95.9985	194	179.836	99.079		156.353	-16.9585	304.517	-10.6171	198.544	-9.42284					1.38507	2.09635	1.51353	152.733	163.272	-10.5393
20240106	154.1	163.285		148	129.751		299	272.019	96.0027	208	179.723	99.0854		156.374	-17.0255	304.557	-10.6838	198.57	-9.49141					1.38514	2.09648	1.51354	152.678	163.285	-10.607
20240107	161.6	163.316		172	129.6		342	271.803	96.0086	232	179.592	99.0937		156.423	-17.1475	304.651	-10.7824	198.632	-9.58558					1.38574	2.09724	1.51345	152.608	163.316	-10.7082
20240108	170.4	163.285		162	129.414		335	271.529	96.0136	192	179.441	99.0997		156.375	-17.2412	304.558	-10.845	198.571	-9.63377					1.38657	2.09815	1.51319	152.518	163.285	-10.7671
20240109	170.1	163.251		158	129.277		384	271.751	96.0074	259	179.74	99.0826		156.32	-17.2999	304.451	-10.7407	198.501	-9.45129					1.39035	2.10209	1.51191	152.591	163.251	-10.6597
20240110	179.9	163.251		178	129.205		399	271.847	96.0053	298	179.836	99.0778		156.321	-17.3459	304.453	-10.7097	198.502	-9.40361					1.39186	2.10399	1.51164	152.622	163.251	-10.6291
20240111	186.2	163.285		186	129.142		381	272.29	95.9967	246	180.09	99.0668		156.373	-17.414	304.556	-10.5945	198.569	-9.30615					1.39451	2.10844	1.51196	152.766	163.285	-10.5182
20240112	180.3	163.304		182	129.181		362	272.88	95.9845	237	180.391	99.0528		156.404	-17.4054	304.615	-10.418	198.608	-9.17233					1.39642	2.11239	1.51272	152.959	163.304	-10.345
20240113	179.4	163.467		181	129.238		351	273.705	95.9724	253	180.915	99.0356		156.661	-17.5045	305.116	-10.2949	198.935	-9.05799					1.39986	2.11783	1.51289	153.228	163.467	-10.2396
20240114	181.7	163.624		161	129.471		354	274.549	95.9597	251	181.445	99.0178		156.908	-17.4859	305.597	-10.1597	199.248	-8.93502					1.40143	2.12054	1.51312	153.503	163.624	-10.1211
20240115	176.6	163.762		140	129.682		309	275.492	95.9444	188	182.055	98.9952		157.126	-17.4661	306.021	-9.97628	199.525	-8.75594					1.40385	2.12436	1.51324	153.81	163.762	-9.95214
20240116	173.8	163.938		134	130.027		317	276.279	95.9338	238	182.522	98.9818		157.402	-17.3915	306.559	-9.87755	199.876	-8.68228					1.40372	2.12477	1.51367	154.067	163.938	-9.87096
20240117	168.5	164.012		147	130.342		305	276.754	95.9263	250	182.945	98.9651		157.519	-17.2529	306.787	-9.78949	200.024	-8.53835					1.40357	2.12328	1.51277	154.222	164.012	-9.79022
20240118	157.1	164.068		130	130.685		330	277.314	95.9163	228	183.311	98.9502		157.607	-17.0818	306.958	-9.6574	200.136	-8.4065					1.4027	2.12201	1.5128	154.404	164.068	-9.66351
20240119	152.4	164.117		143	130.948		333	277.312	95.9181	229	183.334	98.9518		157.684	-16.9556	307.109	-9.70227	200.234	-8.43999					1.40005	2.11773	1.51261	154.404	164.117	-9.71317
20240120	161	164.215		134	131.159		413	277.86	95.91	289	183.693	98.9396		157.838	-16.9028	307.408	-9.6119	200.429	-8.35003					1.40054	2.1185	1.51263	154.582	164.215	-9.63207
20240121	172.9	164.281		155	131.381		366	278.375	95.9014	262	183.975	98.9295		157.942	-16.8172	307.611	-9.50422	200.562	-8.26993					1.40032	2.11884	1.51311	154.75	164.281	-9.53046
20240122	189.9	164.316		166	131.455		395	278.781	95.8941	244	184.255	98.9179		157.998	-16.7999	307.721	-9.40459	200.633	-8.16321					1.40166	2.12074	1.51302	154.883	164.316	-9.43389
20240123	174.7	164.346		148	131.548		348	279.34	95.8834	254	184.562	98.9047		158.045	-16.7653	307.811	-9.24948	200.692	-8.03714					1.403	2.12348	1.51353	155.065	164.346	-9.281
20240124	166.6	164.362		124	131.636		247	279.586	95.8788	179	184.658	98.9009		158.07	-16.7235	307.861	-9.18425	200.724	-8.00443					1.40279	2.12394	1.51408	155.145	164.362	-9.21706
20240125	155.6	164.362		92	131.707		217	280.203	95.8658	159	184.904	98.889		158.07	-16.6779	307.859	-8.98352	200.723	-7.88109					1.40391	2.12747	1.51539	155.346	164.362	-9.01555
20240126	151.9	164.393		83	131.841		237	280.896	95.8524	110	185.296	98.8719		158.118	-16.6187	307.954	-8.7865	200.785	-7.71437					1.40545	2.13056	1.51593	155.572	164.393	-8.82054
20240127	143.6	164.429		64	131.964		164	281.553	95.8401	112	185.712	98.854		158.176	-16.571	308.066	-8.60616	200.858	-7.54052					1.40729	2.13356	1.51607	155.786	164.429	-8.64262
20240128	136.8	164.53		68	132.027		176	281.992	95.8346	104	185.915	98.8498		158.335	-16.6154	308.377	-8.55617	201.061	-7.53292					1.40816	2.13586	1.51678	155.929	164.53	-8.60109
20240129	136.1	164.668		74	132.118		191	282.29	95.8333	113	186.074	98.8496		158.552	-16.6725	308.8	-8.58464	201.336	-7.58058					1.40839	2.13666	1.51709	156.027	164.668	-8.64155
20240130	131	164.796		74	132.236		198	282.784	95.8276	151	186.395	98.8412		158.753	-16.7036	309.191	-8.54069	201.591	-7.53838					1.40956	2.13848	1.51712	156.187	164.796	-8.60818
20240131	132.2	164.966		100	132.482		269	283.299	95.8231	183	186.721	98.8349		159.022	-16.6894	309.714	-8.52899	201.933	-7.53323					1.4094	2.13839	1.51723	156.355	164.966	-8.61095
20240201	132.9	165.14		117	132.748		302	283.915	95.8165	195	187.107	98.826		159.295	-16.6654	310.246	-8.48715	202.279	-7.50081					0.474584	2.14251	4.5145	156.719	165.14	-8.42086
20240202	138.5	165.378		122	133.005		273	284.414	95.8147	155	187.381	98.8257		159.67	-16.6996	310.976	-8.54147	202.755	-7.58267					0.789441	2.14141	2.71256	156.851	165.378	-8.52648
20240203	152	165.586		124	133.279		269	284.819	95.8137	186	187.655	98.824		159.998	-16.6991	311.614	-8.59881	203.172	-7.63725					0.705285	2.13906	3.03291	156.94	165.586	-8.64539
20240204	165.6	165.77		135	133.556		313	285.093	95.8146	208	187.956	98.8196		160.287	-16.6769	312.178	-8.67615	203.539	-7.65603					0.778699	2.13685	2.74413	157.037	165.77	-8.73276
20240205	168.6	165.978		158	133.805		317	285.389	95.8158	225	188.099	98.824		160.615	-16.6916	312.816	-8.76779	203.955	-7.77448					1.14345	2.13743	1.86928	157.236	165.978	-8.74153
20240206	174.1	166.26		159	134.115		364	286	95.8133	250	188.477	98.8213		161.06	-16.7297	313.683	-8.82526	204.521	-7.84461					0.745628	2.13807	2.86748	157.48	166.26	-8.78044
20240207	183.3	166.667		148	134.54		317	286.748	95.8123	230	188.934	98.8214		161.7	-16.7966	314.93	-8.94859	205.333	-7.98649					1.00342	2.13623	2.12895	157.695	166.667	-8.9715
20240208	180	167.08		161	135.049		307	287.408	95.8133	209	189.408	98.8211		162.351	-16.8162	316.197	-9.10471	206.159	-8.12538					0.799708	2.13635	2.67141	158.055	167.08	-9.02471
20240209	178.6	167.501		127	135.474		319	288.512	95.8057	212	189.992	98.8162		163.015	-16.8946	317.49	-9.12724	207.003	-8.21775					1.04817	2.13606	2.03789	158.338	167.501	-9.16322
20240210	188.7	167.89		151	135.868		371	289.381	95.8017	229	190.449	98.8155		163.627	-16.9647	318.684	-9.19501	207.781	-8.34124					0.993608	2.13484	2.14857	158.559	167.89	-9.33165
20240211	175.7	168.265		162	136.315		305	290.058	95.8011	187	190.995	98.8099		164.218	-16.9912	319.834	-9.30984	208.53	-8.40927					0.961009	2.1314	2.21788	158.717	168.265	-9.54836
20240212	203	168.608		156	136.666		342	290.542	95.8032	201	191.326	98.8126		164.758	-17.0506	320.886	-9.45609	209.216	-8.55115					1.20733	2.12786	1.76246	158.803	168.608	-9.80563
20240213	189.9	168.906		136	136.915		278	290.805	95.8082	181	191.466	98.8217		165.227	-17.135	321.798	-9.63116	209.812	-8.74392					1.06635	2.12468	1.99248	158.834	168.906	-10.0719
20240214	179.5	169.159		141	137.079		213	290.901	95.815	165	191.482	98.8342		165.626	-17.2354	322.576	-9.81921	210.318	-8.95602					1.41524	2.12352	1.50047	158.895	169.159	-10.2637
20240215	173.9	169.348		150	137.101		270	291.09	95.8177	188	191.529	98.8419		165.923	-17.3707	323.156	-9.92254	210.696	-9.09729					1.38584	2.12571	1.53389	159.009	169.348	-10.3393
20240216	164.8	169.553		139	137.249		266	291.438	95.8178	170	191.805	98.8398		166.246	-17.4421	323.784	-9.98996	211.106	-9.1427					1.69764	2.12572	1.25216	159.112	169.553	-10.4415
20240217	165.9	169.775		113	137.449		214	291.753	95.8191	150	191.986	98.8431		166.595	-17.4949	324.463	-10.0812	211.549	-9.24738					2.6046	2.12659	0.816477	159.289	169.775	-10.4852
20240218	152.9	170		100	137.647		205	292.299	95.816	124	192.342	98.8384		166.95	-17.5522	325.155	-10.1048	212	-9.27242					2.63719	2.12741	0.806695	159.463	170	-10.5374
20240219	148.6	170.26		73	137.984		190	292.83	95.8143	122	192.759	98.8328		167.36	-17.5528	325.953	-10.162	212.521	-9.2987					2.27563	2.12688	0.93463	159.673	170.26	-10.5878
20240220	149.2	170.511		54	138.271		133	293.474	95.8101	100	193.101	98.8301		167.755	-17.5756	326.723	-10.1766	213.022	-9.35164					2.45894	2.12643	0.864778	159.852	170.511	-10.6592
20240221	166.2	170.758		49	138.532		175	294.025	95.8076	80	193.449	98.827		168.144	-17.6114	327.48	-10.2161	213.516	-9.39828					2.50485	2.12697	0.849141	160.057	170.758	-10.7015
20240222	169.6	170.992		56	138.83		227	294.652	95.8032	159	193.923	98.8175		168.513	-17.6145	328.199	-10.2215	213.985	-9.37514					2.57869	2.12849	0.825415	160.333	170.992	-10.6598
20240223	169.2	171.266		104	139.162		239	295.499	95.7958	170	194.518	98.8046		168.944	-17.6283	329.038	-10.1931	214.532	-9.32903					2.60129	2.13023	0.818913	160.642	171.266	-10.6242
20240224	175.5	171.527		108	139.532		271	296.447	95.7861	166	195.099	98.7918		169.355	-17.6102	329.839	-10.124	215.054	-9.27934					2.07838	2.12792	1.02384	160.793	171.527	-10.7337
20240225	177.1	171.788		115	139.844		251	296.912	95.7858	159	195.556	98.7846		169.767	-17.626	330.641	-10.201	215.577	-9.28709					1.93788	2.1255	1.09682	160.9	171.788	-10.8888
20240226	168.3	172.042		132	140.214		266	297.238	95.788	166	195.929	98.7808		170.166	-17.6018	331.419	-10.3133	216.084	-9.32743					1.79012	2.12349	1.18622	161.064	172.042	-10.9779
20240227	165.1	172.265		120	140.488		252	297.742	95.7857	173	196.271	98.7769		170.517	-17.6107	332.102	-10.346	216.529	-9.35582					1.3382	2.12151	1.58535	161.163	172.265	-11.1015
20240228	164.1	172.459		130	140.751		286	298.047	95.7863	174	196.51	98.7761		170.824	-17.6047	332.699	-10.4156	216.919	-9.40873					1.30728	2.12027	1.6219	161.288	172.459	-11.1712
20240229	161.1	172.642		126	140.879		266	298.43	95.785	164	196.737	98.7753		171.111	-17.668	333.26	-10.4512	217.284	-9.45645					0.94407	2.12133	2.24701	161.426	172.642	-11.2164
20240301	150.1	172.85		117	141.049		257	298.852	95.7838	181	197.014	98.7735		171.439	-17.726	333.897	-10.4957	217.7	-9.50209					#REF!	#REF!	#REF!	#REF!	172.85	#REF!
20240302	149.7	173.117		96	141.296		200	299.312	95.7838	131	197.403	98.7697		171.86	-17.7842	334.717	-10.5775	218.235	-9.54559					1.39709	2.11834	1.51625	161.576	173.117	-11.5414
20240303	142.7	173.38		102	141.532		226	299.882	95.7816	138	197.789	98.7659		172.273	-17.8449	335.523	-10.6225	218.76	-9.58629					1.39749	2.11884	1.51617	161.762	173.38	-11.6184
20240304	137.6	173.679		109	141.781		234	300.532	95.779	165	198.197	98.7629		172.744	-17.9242	336.439	-10.6729	219.357	-9.64636					1.39791	2.11969	1.51633	161.973	173.679	-11.7054
20240305	139.2	173.974		110	141.981		215	301.203	95.776	135	198.597	98.7602		173.209	-18.0294	337.346	-10.714	219.948	-9.70738					1.39876	2.12143	1.51665	162.192	173.974	-11.7822
20240306	133.9	174.261		100	142.134		235	301.499	95.7798	134	198.803	98.7655		173.661	-18.1541	338.225	-10.8586	220.522	-9.84888					1.3987	2.12122	1.51657	162.289	174.261	-11.9723
20240307	134.5	174.522		96	142.274		230	301.825	95.7822	145	198.992	98.7703		174.072	-18.267	339.025	-10.9728	221.043	-9.9761					1.39865	2.12143	1.51677	162.395	174.522	-12.1268
20240308	127.2	174.767		102	142.397		223	302.184	95.7835	144	199.378	98.7656		174.458	-18.3772	339.777	-11.0642	221.534	-10.001					1.40015	2.12212	1.51563	162.512	174.767	-12.255
20240309	132.6	174.936		96	142.542		172	302.589	95.7813	122	199.674	98.7611		174.724	-18.4183	340.295	-11.0804	221.871	-10.0046					1.4008	2.1228	1.51542	162.644	174.936	-12.2916
20240310	125.3	175.12		77	142.608		197	302.89	95.7816	124	199.866	98.7619		175.014	-18.5161	340.861	-11.1395	222.24	-10.0676					1.4015	2.12393	1.51547	162.742	175.12	-12.3777
20240311	125.1	175.261		74	142.548		221	302.882	95.7865	142	199.759	98.7736		175.237	-18.654	341.294	-11.2548	222.523	-10.2299					1.40135	2.12477	1.51624	162.74	175.261	-12.5218
20240312	128.9	175.341		83	142.414		187	302.888	95.789	127	199.737	98.7786		175.362	-18.7888	341.539	-11.3168	222.682	-10.304					1.40251	2.12682	1.51643	162.741	175.341	-12.5997
20240313	126.8	175.489		81	142.419		181	302.841	95.7948	111	199.775	98.7843		175.596	-18.8937	341.993	-11.4483	222.979	-10.4061					1.40273	2.12641	1.51591	162.726	175.489	-12.7631
20240314	125.7	175.652		68	142.422		164	302.953	95.798	117	199.833	98.7899		175.852	-19.0101	342.492	-11.5443	223.304	-10.5107					1.4031	2.12715	1.51603	162.763	175.652	-12.889
20240315	127.7	175.765		52	142.353		144	303.096	95.799	106	199.899	98.7927		176.029	-19.1309	342.838	-11.5921	223.529	-10.5716					1.40424	2.12918	1.51625	162.809	175.765	-12.9554
20240316	142.6	175.857		62	142.348		206	303.332	95.7975	155	200.077	98.7895		176.175	-19.2009	343.122	-11.5966	223.715	-10.5661					1.40555	2.13092	1.51608	162.886	175.857	-12.9712
20240317	149.8	175.947		73	142.373		279	303.647	95.7945	173	200.274	98.7853		176.316	-19.2516	343.397	-11.5756	223.894	-10.5495					1.40669	2.13276	1.51616	162.989	175.947	-12.9581
20240318	167.4	176.015		120	142.49		288	303.984	95.7903	187	200.534	98.7773		176.423	-19.2338	343.605	-11.5312	224.03	-10.4876					1.40735	2.13336	1.51587	163.099	176.015	-12.9162
20240319	167.5	176.045		132	142.507		249	304.025	95.7905	175	200.488	98.7808		176.471	-19.2462	343.698	-11.543	224.09	-10.5325					1.40686	2.1334	1.51643	163.112	176.045	-12.9329
20240320	174.1	176.037		123	142.378		278	304.014	95.7904	199	200.548	98.7778		176.459	-19.3136	343.674	-11.5402	224.075	-10.4994					1.40856	2.13526	1.51592	163.108	176.037	-12.9288
20240321	179.9	176.053		159	142.2		372	304.063	95.79	269	200.603	98.7762		176.484	-19.426	343.723	-11.5384	224.106	-10.4877					1.41071	2.13828	1.51575	163.125	176.053	-12.9286
20240322	196.2	176.014		163	141.984		342	303.921	95.7914	231	200.425	98.782		176.422	-19.5203	343.602	-11.5487	224.027	-10.5356					1.4116	2.14053	1.51638	163.078	176.014	-12.9356
20240323	209.3	175.965		154	141.775		299	303.866	95.7909	190	200.329	98.7838		176.345	-19.6033	343.452	-11.5261	223.93	-10.5395					1.413	2.14329	1.51684	163.06	175.965	-12.9047
20240324	194	175.937		161	141.597		329	303.726	95.7926	211	200.219	98.7872		176.301	-19.6845	343.368	-11.5449	223.875	-10.5663					1.414	2.145	1.51697	163.015	175.937	-12.9226
20240325	189.1	175.92		163	141.449		287	303.578	95.7949	181	200.173	98.7884		176.274	-19.756	343.315	-11.5744	223.84	-10.5734					1.41515	2.1462	1.51658	162.966	175.92	-12.9535
20240326	177.4	175.926		138	141.351		291	303.811	95.7907	202	200.334	98.7816		176.284	-19.8165	343.334	-11.5115	223.853	-10.5062					1.41729	2.14934	1.51652	163.042	175.926	-12.8839
20240327	173.9	175.952		113	141.318		231	303.932	95.7892	143	200.416	98.7793		176.325	-19.8538	343.414	-11.497	223.905	-10.4903					1.4182	2.1507	1.5165	163.082	175.952	-12.8707
20240328	172.1	176.022		98	141.326		187	304.268	95.7851	135	200.647	98.7727		176.434	-19.8987	343.626	-11.4537	224.043	-10.4429					1.41974	2.15295	1.51644	163.192	176.022	-12.8301
20240329	166.8	176.127		79	141.436		148	304.693	95.7805	115	200.942	98.765		176.599	-19.9116	343.948	-11.4131	224.253	-10.3948					1.42073	2.15429	1.51632	163.33	176.127	-12.7966
20240330	139.3	176.235		51	141.578		132	305.479	95.7691	107	201.447	98.7485		176.771	-19.9086	344.282	-11.2705	224.471	-10.2571					1.42287	2.15767	1.51643	163.586	176.235	-12.649
20240331	133.4	176.34		63	141.666		124	305.926	95.7641	75	201.855	98.736		176.936	-19.9339	344.604	-11.2238	224.681	-10.1592					1.42487	2.15949	1.51557	163.732	176.34	-12.6084
20240401	120.3	176.486		32	141.704		116	306.745	95.7535	63	202.408	98.7193		177.165	-20.016	345.051	-11.1015	224.972	-10.0296					1.42839	2.16469	1.51548	163.999	176.486	-12.4871
20240402	112.7	176.725		39	141.825		148	307.356	95.7499	105	202.805	98.714		177.543	-20.118	345.785	-11.1136	225.451	-10.0445					1.42997	2.16716	1.51552	164.198	176.725	-12.5274
20240403	111.7	177.057		38	142.005		133	307.685	95.7545	94	203.005	98.7218		178.065	-20.2507	346.802	-11.2794	226.114	-10.2198					1.42956	2.16671	1.51565	164.305	177.057	-12.7517
20240404	113.8	177.487		48	142.156		159	308.436	95.7544	104	203.4	98.726		178.742	-20.4686	348.122	-11.4001	226.974	-10.3863					1.43082	2.1697	1.5164	164.55	177.487	-12.9371
20240405	120.6	177.857		78	142.299		202	308.778	95.76	153	203.66	98.733		179.325	-20.6475	349.256	-11.5898	227.714	-10.5631					1.43122	2.16993	1.51614	164.662	177.857	-13.1953
20240406	123.1	178.191		80	142.364		197	309.156	95.7638	100	203.888	98.7396		179.85	-20.8429	350.28	-11.7403	228.381	-10.7249					1.43215	2.17158	1.51631	164.785	178.191	-13.4058
20240407	124.9	178.484		84	142.46		179	309.641	95.7642	135	204.195	98.7409		180.313	-20.9927	351.181	-11.8286	228.969	-10.8199					1.43334	2.17353	1.5164	164.943	178.484	-13.5414
20240408	125.2	178.721		77	142.512		195	309.825	95.7685	108	204.337	98.7464		180.686	-21.127	351.907	-11.9584	229.442	-10.9418					1.43382	2.17402	1.51624	165.003	178.721	-13.7183
20240409	124.8	178.883		55	142.482		220	309.953	95.7713	142	204.416	98.7509		180.94	-21.2546	352.403	-12.0457	229.765	-11.0326					1.43468	2.17538	1.51628	165.045	178.883	-13.8379
20240410	131.8	179.036		55	142.507		178	310.066	95.7741	135	204.482	98.7556		181.181	-21.3456	352.872	-12.1308	230.071	-11.1222					1.43489	2.1758	1.51635	165.081	179.036	-13.9542
20240411	144.4	179.195		90	142.496		186	310.43	95.7725	131	204.573	98.7595		181.432	-21.4604	353.36	-12.1491	230.39	-11.2058					1.43564	2.17852	1.51746	165.2	179.195	-13.9946
20240412	152.3	179.35		86	142.493		245	310.685	95.7727	165	204.781	98.7582		181.676	-21.5676	353.837	-12.1954	230.7	-11.2351					1.43713	2.18035	1.51716	165.283	179.35	-14.0668
20240413	161.9	179.526		120	142.529		243	310.964	95.7732	146	205.005	98.7571		181.953	-21.6675	354.376	-12.2502	231.052	-11.273					1.43834	2.18177	1.51686	165.374	179.526	-14.1516
20240414	179.5	179.653		148	142.6		294	311.381	95.7696	194	205.216	98.7543		182.154	-21.7147	354.767	-12.2295	231.307	-11.2796					1.43911	2.1836	1.51733	165.51	179.653	-14.1433
20240415	193.2	179.755		171	142.688		307	311.51	95.7705	190	205.326	98.7546		182.314	-21.7353	355.079	-12.2703	231.51	-11.3101					1.43899	2.18316	1.51715	165.552	179.755	-14.2029
20240416	200.2	179.831		181	142.721		369	311.841	95.7668	233	205.479	98.7518		182.434	-21.7688	355.312	-12.2346	231.662	-11.3022					1.43973	2.18498	1.51763	165.66	179.831	-14.171
20240417	218.2	179.914		209	142.844		513	312.164	95.7634	358	205.69	98.7468		182.565	-21.7571	355.566	-12.2064	231.828	-11.2745					1.43997	2.18535	1.51764	165.766	179.914	-14.1484
20240418	228.8	180.018		223	143.049		512	312.726	95.7564	363	206.063	98.7361		182.728	-21.7146	355.885	-12.1271	232.036	-11.1934					1.4405	2.18614	1.51762	165.949	180.018	-14.0691
20240419	215.4	180.117		240	143.268		469	313.082	95.753	314	206.353	98.7286		182.884	-21.6617	356.189	-12.1022	232.234	-11.1442					1.44033	2.18528	1.51721	166.065	180.117	-14.0522
20240420	211.6	180.216		232	143.449		548	313.526	95.7481	340	206.671	98.72		183.041	-21.6299	356.494	-12.0529	232.433	-11.0835					1.44073	2.18562	1.51703	166.209	180.216	-14.007
20240421	219.4	180.323		231	143.625		519	313.962	95.7435	347	206.904	98.7153		183.209	-21.606	356.821	-12.0114	232.646	-11.0648					1.44059	2.18599	1.51743	166.351	180.323	-13.9715
20240422	229.2	180.446		265	143.918		550	314.378	95.7398	358	207.318	98.7038		183.402	-21.5288	357.197	-11.9876	232.892	-10.9809					1.44053	2.18443	1.51641	166.487	180.446	-13.9585
20240423	221.6	180.592		266	144.151		505	314.841	95.736	362	207.595	98.6993		183.633	-21.5006	357.647	-11.9688	233.185	-10.9742					1.44012	2.18411	1.51662	166.638	180.592	-13.9541
20240424	201.4	180.767		251	144.378		411	315.422	95.731	290	207.945	98.693		183.909	-21.4947	358.184	-11.9386	233.535	-10.9575					1.44028	2.18469	1.51685	166.828	180.767	-13.9399
20240425	168.8	180.959		209	144.66		431	316.11	95.7246	271	208.395	98.6835		184.211	-21.4702	358.772	-11.8913	233.918	-10.9114					1.44058	2.18519	1.51688	167.052	180.959	-13.9075
20240426	154.6	181.184		141	145		373	316.937	95.7167	251	208.967	98.6704		184.564	-21.4365	359.461	-11.8298	234.367	-10.8377					1.44115	2.18577	1.51668	167.321	181.184	-13.8621
20240427	154.6	181.484		139	145.444		293	317.918	95.7085	188	209.625	98.6576		185.037	-21.3974	360.382	-11.783	234.968	-10.7857					1.44128	2.18585	1.51661	167.641	181.484	-13.8426
20240428	142	181.804		119	145.984		249	318.726	95.7041	184	210.145	98.6513		185.541	-21.3199	361.362	-11.7988	235.607	-10.8069					1.43951	2.1833	1.51669	167.905	181.804	-13.8989
20240429	139.5	182.129		100	146.499		191	319.866	95.6939	133	210.732	98.6427		186.053	-21.2598	362.361	-11.7273	236.258	-10.8045					1.43845	2.1834	1.51788	168.276	182.129	-13.8528
20240430	132.1	182.469		87	146.912		260	320.553	95.6923	162	211.145	98.6419		186.589	-21.2643	363.405	-11.7916	236.939	-10.8861					1.43722	2.18194	1.51817	168.5	182.469	-13.9689
20240501	136.9	182.8		116	147.184		311	321.285	95.6897	217	211.603	98.6388		187.11	-21.3387	364.42	-11.8366	237.601	-10.9418					1.43768	2.18289	1.51834	168.739	182.8	-14.0614
20240502	144.1	183.101		144	147.452		305	321.871	95.6886	206	211.907	98.6406		187.584	-21.3941	365.342	-11.8986	238.202	-11.0389					1.43712	2.18289	1.51893	168.93	183.101	-14.1709
20240503	158.6	183.365		160	147.721		336	322.441	95.6868	239	212.244	98.6393		187.999	-21.425	366.151	-11.9377	238.729	-11.0944					1.43679	2.18278	1.5192	169.116	183.365	-14.2489
20240504	169.5	183.62		183	147.964		316	322.593	95.692	196	212.332	98.6477		188.401	-21.4629	366.933	-12.0838	239.239	-11.2467					1.43502	2.18021	1.51928	169.165	183.62	-14.4541
20240505	180	183.704		183	148.118		315	322.912	95.689	235	212.521	98.6441		188.535	-21.4371	367.193	-12.0595	239.409	-11.2311					1.43481	2.1801	1.51944	169.269	183.704	-14.4352
20240506	174.3	183.791		202	148.275		346	323.251	95.6857	223	212.732	98.6396		188.671	-21.4106	367.46	-12.0308	239.582	-11.2072					1.43471	2.18007	1.51952	169.38	183.791	-14.4113
20240507	207.4	183.902		193	148.472		381	323.548	95.6839	242	212.953	98.6358		188.846	-21.3792	367.8	-12.0315	239.805	-11.1973					1.43429	2.17918	1.51934	169.477	183.902	-14.4255
20240508	231.4	184.017		173	148.668		401	323.875	95.6817	248	213.092	98.6356		189.027	-21.351	368.152	-12.0268	240.034	-11.2243					1.43334	2.17852	1.51989	169.583	184.017	-14.4337
20240509	237.7	184.131		180	148.767		429	324.058	95.682	262	213.287	98.633		189.206	-21.3731	368.501	-12.0603	240.261	-11.2271					1.4337	2.1783	1.51935	169.643	184.131	-14.4875
20240510	227.9	184.264		173	148.905		438	324.363	95.6808	266	213.497	98.6308		189.416	-21.3873	368.911	-12.0755	240.529	-11.2384					1.43378	2.17832	1.51929	169.742	184.264	-14.522
20240511	218	184.385		170	149.059		401	324.742	95.6779	272	213.695	98.6284		189.606	-21.3852	369.281	-12.0609	240.77	-11.2453					1.43363	2.17862	1.51966	169.866	184.385	-14.519
20240512	226.4	184.513		200	149.249		410	325.096	95.6757	312	213.972	98.6232		189.808	-21.3682	369.673	-12.0587	241.026	-11.2245					1.43365	2.1782	1.51934	169.981	184.513	-14.5318
20240513	220	184.654		243	149.438		450	325.558	95.6719	267	214.245	98.6188		190.03	-21.3606	370.105	-12.0364	241.307	-11.2149					1.43367	2.17854	1.51956	170.132	184.654	-14.5219
20240514	224.6	184.808		203	149.654		354	325.932	95.6701	252	214.511	98.6153		190.272	-21.3476	370.578	-12.0475	241.615	-11.2178					1.43339	2.17791	1.51942	170.254	184.808	-14.5538
20240515	220.8	184.987		210	149.907		418	326.53	95.6653	269	214.935	98.6067		190.555	-21.3315	371.129	-12.0171	241.975	-11.1747					1.43379	2.17822	1.5192	170.449	184.987	-14.5386
20240516	211.9	185.182		211	150.238		469	327.185	95.6599	276	215.355	98.5989		190.861	-21.2841	371.725	-11.982	242.363	-11.1437					1.43343	2.17778	1.51928	170.662	185.182	-14.5194
20240517	208.7	185.38		200	150.58		382	327.766	95.6559	254	215.752	98.5923		191.174	-21.2342	372.334	-11.9697	242.76	-11.1255					1.43281	2.1767	1.51918	170.852	185.38	-14.5283
20240518	198.8	185.575		179	150.934		400	328.497	95.6492	249	216.257	98.5812		191.481	-21.1752	372.932	-11.915	243.151	-11.0604					1.43279	2.17642	1.51901	171.09	185.575	-14.4852
20240519	205.5	185.751		183	151.274		383	329.04	95.6452	242	216.616	98.5751		191.757	-21.1116	373.47	-11.8965	243.501	-11.0411					1.43194	2.17512	1.519	171.267	185.751	-14.4836
20240520	204.5	185.891		155	151.513		329	329.549	95.6408	230	217.02	98.5656		191.978	-21.0781	373.9	-11.8618	243.782	-10.9777					1.43235	2.17505	1.51852	171.433	185.891	-14.458
20240521	195.4	185.986		177	151.672		313	329.706	95.641	212	217.066	98.5682		192.128	-21.0565	374.192	-11.8885	243.972	-11.0282					1.43115	2.1738	1.51892	171.484	185.986	-14.5018
20240522	200.6	186.04		164	151.669		274	329.795	95.6411	190	217.127	98.5682		192.213	-21.0934	374.357	-11.9037	244.08	-11.0425					1.43159	2.17444	1.5189	171.513	186.04	-14.5267
20240523	180.7	186.043		144	151.645		249	329.719	95.6425	156	217.061	98.571		192.218	-21.1082	374.368	-11.9266	244.087	-11.0723					1.43138	2.17429	1.51902	171.488	186.043	-14.5551
20240524	167	186.034		142	151.545		219	329.657	95.6433	160	217.009	98.5726		192.204	-21.1539	374.339	-11.9363	244.068	-11.0868					1.43198	2.17531	1.5191	171.468	186.034	-14.5658
20240525	156.4	186.07		112	151.5		263	329.743	95.6429	181	216.997	98.5748		192.261	-21.2008	374.451	-11.9395	244.141	-11.1181					1.43232	2.17652	1.51958	171.496	186.07	-14.574
20240526	159.7	186.112		128	151.426		261	329.781	95.6435	172	216.956	98.5783		192.326	-21.2661	374.578	-11.9593	244.223	-11.1649					1.43276	2.17784	1.52003	171.509	186.112	-14.6032
20240527	174.6	186.143		142	151.368		287	329.777	95.6445	174	216.912	98.5815		192.375	-21.3159	374.673	-11.9827	244.285	-11.2055					1.43301	2.17864	1.52033	171.507	186.143	-14.6354
20240528	170.9	186.175		163	151.349		306	329.885	95.6436	197	216.926	98.5824		192.426	-21.3469	374.772	-11.9771	244.35	-11.2231					1.43329	2.17963	1.52072	171.543	186.175	-14.6325
20240529	175.2	186.203		169	151.353		262	329.95	95.6434	177	216.897	98.5849		192.47	-21.3627	374.858	-11.98	244.406	-11.2556					1.43305		1.52123	171.564	186.203	-14.6393
20240530	177.7	186.263		165	151.324		277	330.127	95.6421	191	216.982	98.5842		192.564	-21.4158	375.041	-11.9756	244.525	-11.2638					1.43389		1.52145	171.621	186.263	-14.6411
20240531	184.5	186.334		155	151.334		347	330.306	95.6413	224	216.997	98.587		192.677	-21.4568	375.261	-11.9797	244.669	-11.3099					1.43389		1.52217	171.68	186.334	-14.6547
20240601	193.3	186.42		181	151.418		438	330.616	95.6386	287	217.167	98.5842		192.811	-21.4679	375.522	-11.9583	244.839	-11.3024					1.43422			171.781	186.42	-14.6388
20240602	185	186.546		207	151.571		417	331.072	95.6346	281	217.433	98.5795		193.01	-21.4696	375.91	-11.9278	245.092	-11.2851					1.43452			171.929	186.546	-14.6165
20240603	191.4	186.699		212	151.713		409	331.428	95.6332	290	217.602	98.5799		193.251	-21.4942	376.38	-11.9431	245.398	-11.3271					1.43429			172.046	186.699	-14.6536
20240604	198	186.857		211	151.829		373	331.559	95.6357	262	217.556	98.5889		193.5	-21.5353	376.865	-12.0218	245.714	-11.46					1.4329			172.088	186.857	-14.7692
20240605	201.1	187.005		182	151.964		342	331.732	95.6372	234	217.62	98.5932		193.734	-21.5604	377.319	-12.0819	246.011	-11.5403					1.43205			172.145	187.005	-14.8609
20240606	196.7	187.189		159	152.018		283	332.015	95.638	166	217.719	98.5977		194.023	-21.6493	377.882	-12.1379	246.378	-11.6321					1.43219			172.237	187.189	-14.952
20240607	190	187.36		163	152.1		304	332.273	95.6387	184	217.858	98.6001		194.292	-21.7158	378.406	-12.1916	246.72	-11.6984					1.43233			172.321	187.36	-15.039
20240608	196.2	187.538		173	152.218		278	332.508	95.6401	196	217.976	98.6036		194.572	-21.7678	378.953	-12.2562	247.076	-11.7778					1.432			172.397	187.538	-15.1405
20240609	186.4	187.731		153	152.295		320	332.787	95.6412	196	218.067	98.6089		194.876	-21.8504	379.544	-12.3194	247.462	-11.8784					1.43187			172.488	187.731	-15.2423
20240610	183.3	187.929		123	152.384		243	333.092	95.642	144	218.165	98.6141		195.188	-21.9294	380.151	-12.3792	247.857	-11.9796					1.43168			172.588	187.929	-15.3408
20240611	170.1	188.13		107	152.569		298	333.632	95.6389	164	218.549	98.6081		195.505	-21.9616	380.769	-12.3794	248.26	-11.9677					1.43246			172.764	188.13	-15.366
20240612	170	188.332		124	152.742		286	334.077	95.6374	192	218.788	98.608		195.823	-21.9997	381.388	-12.405	248.664	-12.0147					1.4324			172.909	188.332	-15.4229
20240613	175.5	188.509		151	152.874		287	334.515	95.6353	180	219.006	98.6075		196.102	-22.0438	381.932	-12.415	249.019	-12.0523					1.43259			173.052	188.509	-15.4573
20240614	174.3	188.649		158	152.985		289	334.96	95.632	179	219.282	98.603		196.321	-22.0744	382.359	-12.3966	249.297	-12.04					1.43336			173.197	188.649	-15.4516
20240615	176.1	188.8		151	153.105		248	335.276	95.6312	146	219.46	98.6029		196.56	-22.1075	382.823	-12.4201	249.6	-12.0753					1.43339			173.3	188.8	-15.4996
20240616	172.6	188.938		152	153.196		302	335.474	95.632	165	219.62	98.603		196.777	-22.1477	383.247	-12.4655	249.876	-12.1084					1.43359			173.364	188.938	-15.5736
20240617	185.7	189.06		141	153.324		292	335.625	95.6331	180	219.606	98.6091		196.97	-22.1586	383.622	-12.5116	250.12	-12.1998					1.4323			173.414	189.06	-15.6464
20240618	199	189.163		135	153.372		336	335.583	95.6368	169	219.583	98.6146		197.131	-22.198	383.936	-12.594	250.325	-12.2808					1.4317			173.4	189.163	-15.7625
20240619	202.3	189.212		150	153.382		292	335.494	95.6398	178	219.494	98.6204		197.208	-22.2232	384.087	-12.6516	250.423	-12.3509					1.43102			173.371	189.212	-15.8407
20240620	210	189.212		165	153.396		265	335.423	95.641	202	219.347	98.6261		197.209	-22.2164	384.088	-12.6703	250.424	-12.4098					1.42994			173.348	189.212	-15.8642
20240621	203.3	189.218		148	153.401		313	335.421	95.6412	179	219.253	98.6301		197.218	-22.2177	384.105	-12.6748	250.435	-12.4512					1.42928			173.347	189.218	-15.8705
20240622	202.1	189.245		160	153.418		263	335.533	95.6401	201	219.317	98.6288		197.26	-22.2258	384.188	-12.6643	250.489	-12.4444					1.42954			173.384	189.245	-15.8608
20240623	202.2	189.31		164	153.467		290	335.682	95.6396	170	219.433	98.6272		197.364	-22.2417	384.389	-12.6714	250.62	-12.444					1.42984			173.432	189.31	-15.878
20240624	205.3	189.348		153	153.583		268	335.843	95.638	156	219.518	98.6256		197.423	-22.2064	384.505	-12.6557	250.696	-12.4369					1.42931			173.485	189.348	-15.8632
20240625	200.1	189.438		146	153.712		338	336.163	95.6353	213	219.728	98.6215		197.564	-22.1963	384.78	-12.635	250.876	-12.4157					1.42947			173.589	189.438	-15.8485
20240626	187.4	189.567		180	153.853		331	336.605	95.6317	211	220.029	98.6156		197.768	-22.2056	385.177	-12.6104	251.134	-12.3859					1.43013			173.733	189.567	-15.834
20240627	188.6	189.712		174	154.103		378	336.994	95.6295	218	220.332	98.6103		197.996	-22.1688	385.621	-12.6103	251.424	-12.3662					1.42977			173.86	189.712	-15.8521
20240628	186.7	189.867		177	154.294		431	337.495	95.6258	283	220.657	98.6046		198.24	-22.1682	386.096	-12.5877	251.733	-12.3449					1.43011			174.023	189.867	-15.8431
20240629	192.7	190.034		218	154.524		459	337.948	95.6232	287	220.961	98.6003		198.503	-22.1552	386.608	-12.5865	252.067	-12.3405					1.42994			174.171	190.034	-15.8627
20240630	179.6	190.212		208	154.815		388	338.635	95.617	266	221.41	98.5909		198.784	-22.119	387.156	-12.5325	252.424	-12.2864					1.43016			174.395	190.212	-15.817
20240701	176.3	190.371		197	155.15		397	339.082	95.6143	294	221.794	98.5832		199.034	-22.0487	387.643	-12.5274	252.742	-12.2449					1.42955			174.541	190.371	-15.8304
20240702	169.3	190.564		197	155.477		328	339.557	95.6121	219	222.164	98.5776		199.339	-22.0037	388.236	-12.5385	253.129	-12.2329					1.42892			174.696	190.564	-15.8687
20240703	173.1	190.739		178	155.764		319	340.02	95.6096	196	222.503	98.5724		199.614	-21.9672	388.771	-12.5399	253.478	-12.2197					1.42846			174.846	190.739	-15.8923
20240704	178.8	190.92		138	156.082		327	340.508	95.6069	230	222.795	98.5693		199.9	-21.9197	389.329	-12.5396	253.841	-12.2303					1.42742			175.006	190.92	-15.9148
20240705	171.2	191.081		137	156.267		310	340.626	95.6097	189	222.881	98.5732		200.153	-21.9261	389.822	-12.6201	254.163	-12.3078					1.42628			175.044	191.081	-16.0372
20240706	171.6	191.225		127	156.391		249	340.787	95.6113	151	222.977	98.576		200.38	-21.9528	390.263	-12.6776	254.45	-12.3693					1.42577			175.097	191.225	-16.1285
20240707	177.1	191.349		122	156.419		269	340.927	95.6126	164	223.027	98.5796		200.574	-22.0145	390.642	-12.7265	254.697	-12.4346					1.42583			175.142	191.349	-16.2065
20240708	174.1	191.448		112	156.367		282	340.923	95.6156	190	222.997	98.5852		200.73	-22.1011	390.946	-12.7953	254.895	-12.5145					1.42611			175.141	191.448	-16.3068
20240709	184.2	191.518		141	156.348		319	340.943	95.6173	230	223.101	98.5844		200.841	-22.1535	391.162	-12.8384	255.036	-12.522					1.42695			175.147	191.518	-16.3707
20240710	220.8	191.59		184	156.342		401	340.798	95.6218	280	222.98	98.5923		200.954	-22.2001	391.382	-12.9245	255.18	-12.6186					1.42623			175.1	191.59	-16.4899
20240711	211.9	191.629		173	156.269		419	340.601	95.6262	267	222.726	98.6038		201.016	-22.2603	391.503	-13.0016	255.259	-12.7449					1.42527			175.036	191.629	-16.5933
20240712	216.7	191.648		166	156.169		484	340.464	95.629	280	222.647	98.6077		201.045	-22.3215	391.559	-13.0491	255.295	-12.7883					1.42568			174.991	191.648	-16.6563
20240713	246.3	191.686		173	156.081		487	340.391	95.6313	294	222.599	98.6113		201.106	-22.3884	391.677	-13.094	255.372	-12.8337					1.42617			174.968	191.686	-16.7187
20240714	241.7	191.728		212	155.997		517	340.355	95.6332	326	222.495	98.6172		201.172	-22.4559	391.806	-13.1317	255.456	-12.9028					1.42628			174.956	191.728	-16.7722
20240715	240.9	191.762		243	155.98		576	340.308	95.635	370	222.397	98.6225		201.225	-22.4852	391.911	-13.1669	255.524	-12.9644					1.42581			174.94	191.762	-16.8217
20240716	249.9	191.814		285	156.034		600	340.416	95.6347	399	222.515	98.6203		201.307	-22.4895	392.07	-13.1747	255.628	-12.9535					1.42607			174.976	191.814	-16.8386
20240717	231.1	191.876		283	156.11		583	340.497	95.6352	365	222.462	98.6251		201.405	-22.4894	392.26	-13.1961	255.752	-13.0165					1.42503			175.002	191.876	-16.8741
20240718	215.5	191.957		290	156.141		492	340.619	95.6355	352	222.367	98.6324		201.532	-22.5227	392.507	-13.2195	255.913	-13.1085					1.42414			175.042	191.957	-16.9147
20240719	208.2	192.077		273	156.232		506	340.656	95.6384	345	222.347	98.6386		201.722	-22.5508	392.877	-13.2919	256.154	-13.198					1.42319			175.054	192.077	-17.0233
20240720	214.1	192.215		227	156.278		457	340.683	95.642	285	222.324	98.6457		201.939	-22.6112	393.3	-13.3782	256.43	-13.3003					1.42262			175.063	192.215	-17.1524
20240721	204.2	192.324		221	156.355		426	340.43	95.6494	270	222.091	98.6597		202.11	-22.6384	393.633	-13.5159	256.648	-13.4646					1.42042			174.98	192.324	-17.3436
20240722	191	192.392		171	156.36		394	340.34	95.6529	269	221.951	98.6682		202.217	-22.677	393.841	-13.5844	256.783	-13.5649					1.41949			174.951	192.392	-17.4407
20240723	181	192.4		174	156.326		453	340.148	95.6564	273	221.873	98.6716		202.231	-22.699	393.868	-13.6392	256.801	-13.601					1.4193			174.888	192.4	-17.5122
20240724	180.4	192.463		170	156.356		353	340.12	95.6587	214	221.76	98.6789		202.329	-22.722	394.059	-13.6881	256.925	-13.6871					1.4183			174.879	192.463	-17.5836
20240725	172.4	192.554		179	156.47		445	340.45	95.6559	251	221.911	98.6771		202.473	-22.7205	394.34	-13.6657	257.108	-13.6895					1.41824			174.987	192.554	-17.5673
20240726	181.8	192.685		195	156.699		477	340.89	95.6524	292	222.135	98.6742		202.679	-22.6864	394.742	-13.6424	257.37	-13.6904					1.4176			175.13	192.685	-17.5551
20240727	186.7	192.83		210	156.961		475	341.261	95.6505	304	222.536	98.6651		202.908	-22.6442	395.187	-13.6458	257.661	-13.6322					1.41778			175.251	192.83	-17.5793
20240728	221.1	193.006		201	157.293		441	341.896	95.6452	285	222.932	98.6576		203.185	-22.5863	395.726	-13.6029	258.012	-13.5964					1.4173			175.458	193.006	-17.548
20240729	230	193.208		214	157.613		423	342.493	95.6412	280	223.36	98.6501		203.502	-22.5497	396.344	-13.5871	258.415	-13.5656					1.41714			175.653	193.208	-17.5549
20240730	228.9	193.413		230	157.914		483	343.04	95.6382	323	223.758	98.6438		203.826	-22.5251	396.974	-13.5864	258.826	-13.5488					1.41696			175.831		-17.5821
20240731	242.2	193.638		270	158.217		486	343.565	95.6361	320	224.022	98.6437		204.18	-22.5114	397.666	-13.6045	259.277	-13.5974					1.41592			176.002		-17.6361
20240801	241.4	193.861		260	158.428		486	343.836	95.6382	320	224.171	98.6479		204.531	-22.5411	398.348	-13.6845	259.722	-13.6881					1.41497			176.091		-17.7703
20240802	254.5	194.083		239	158.578		483	343.989	95.6421	285	224.277	98.6537		204.88	-22.5995	399.028	-13.7933	260.165	-13.7943					1.4143			176.14		-17.9422
20240803	251.8	194.285		232	158.712		439	344.249	95.6437	300	224.531	98.6529		205.2	-22.655	399.651	-13.8625	260.571	-13.8311					1.41471			176.225		-18.0603
20240804	247.9	194.44		232	158.839		371	344.526	95.6437	265	224.673	98.6544		205.444	-22.6849	400.126	-13.8957	260.881	-13.8791					1.41447			176.315		-18.125
20240805	254.4	194.546		213	158.926		381	344.642	95.6449	240	224.734	98.6567		205.611	-22.7051	400.451	-13.9365	261.093	-13.9255					1.41408			176.353		-18.1931
20240806	277.7	194.642		239	158.93		491	344.744	95.646	317	224.733	98.661		205.761	-22.7601	400.745	-13.9741	261.284	-13.989					1.41404			176.387		-18.2555
20240807	311.7	194.718		278	158.93		574	344.673	95.6494	353	224.639	98.668		205.881	-22.8052	400.978	-14.042	261.436	-14.0749					1.41345			176.363		-18.3549
20240808	308.5	194.761		288	158.97		512	344.776	95.6489	322	224.619	98.6707		205.948	-22.8105	401.108	-14.0441	261.521	-14.1105					1.41296			176.397		-18.3637
20240809	313.9	194.816		264	158.963		609	344.918	95.6482	370	224.678	98.6709		206.035	-22.8467	401.277	-14.0451	261.631	-14.1243					1.4134			176.443		-18.3726
20240810	299	194.876		249	159.082		516	345.015	95.6483	293	224.726	98.6718		206.13	-22.8244	401.464	-14.0607	261.753	-14.1459					1.41264			176.475		-18.4016
20240811	289	194.9		243	159.113		442	344.917	95.6506	305	224.709	98.6734		206.167	-22.8234	401.535	-14.1004	261.799	-14.1673					1.41227			176.443		-18.4568
20240812	279.6	194.972		229	159.102		452	345.068	95.6503	290	224.852	98.6711		206.281	-22.8713	401.757	-14.1102	261.944	-14.1603					1.41326			176.492		-18.4799
20240813	266.7	194.942		209	159.114		392	345.08	95.6492	223	224.943	98.6663		206.233	-22.8477	401.664	-14.0874	261.883	-14.1057					1.41373			176.496		-18.4457
20240814	254.6	194.961		182	159.202		312	345.336	95.6455	196	225.111	98.6607		206.263	-22.8164	401.723	-14.0362	261.922	-14.0542					1.414			176.579		-18.3814
20240815	233.2	195.02		156	159.271		372	345.843	95.639	236	225.341	98.6544		206.356	-22.8175	401.904	-13.9488	262.04	-14.0051					1.41483			176.745		-18.2751
20240816	230.5	195.101		199	159.307		396	346.135	95.6366	271	225.485	98.6525		206.484	-22.8479	402.152	-13.9294	262.202	-14.0034					1.41541			176.84		-18.261
20240817	235.2	195.217		197	159.385		376	346.444	95.6349	236	225.699	98.6495		206.667	-22.8787	402.509	-13.9289	262.435	-13.9981					1.41606			176.941		-18.2766
20240818	236.6	195.331		202	159.564		402	346.957	95.6298	271	225.992	98.6432		206.846	-22.8586	402.857	-13.8757	262.661	-13.9605					1.41631			177.108		-18.2225
20240819	244.8	195.495		224	159.795		386	347.51	95.6256	268	226.389	98.6354		207.105	-22.8436	403.361	-13.8465	262.99	-13.9172					1.41675			177.288		-18.2069
20240820	243.8	195.678		215	160.132		394	348.125	95.6209	243	226.797	98.6279		207.392	-22.7877	403.921	-13.8135	263.355	-13.8817					1.41631			177.489		-18.1888
20240821	244.5	195.859		209	160.547		402	348.969	95.6125	265	227.294	98.617		207.678	-22.6943	404.478	-13.7236	263.718	-13.8117					1.41575			177.764		-18.0953
20240822	235.8	195.975		214	160.984		408	349.654	95.6048	286	227.874	98.6002		207.861	-22.552	404.834	-13.6305	263.951	-13.668					1.4155			177.987		-17.9883
20240823	247.1	196.079		213	161.398		502	350.138	95.6	333	228.146	98.5945		208.025	-22.4142	405.153	-13.5787	264.158	-13.6328					1.41357			178.145		-17.9341
20240824	237.3	196.185		225	161.625		506	350.579	95.596	308	228.377	98.5904		208.192	-22.3676	405.479	-13.5394	264.371	-13.6149					1.41301			178.289		-17.8966
20240825	237.6	196.268		205	161.837		361	350.896	95.5933	264	228.625	98.5847		208.321	-22.3136	405.731	-13.5149	264.535	-13.5746					1.41269			178.392		-17.8753
20240826	237	196.344		219	162.024		346	351.296	95.5891	239	228.904	98.5776		208.442	-22.2689	405.965	-13.4664	264.688	-13.5193					1.41278			178.522		-17.8214
20240827	225.8	196.456		182	162.144		387	351.639	95.5869	246	229.157	98.573		208.618	-22.2772	406.309	-13.4554	264.912	-13.4971					1.41329			178.634		-17.8219
20240828	216.1	196.582		186	162.313		311	352.04	95.5841	231	229.383	98.57		208.817	-22.27	406.695	-13.4388	265.164	-13.4939					1.41321			178.765		-17.8169
20240829	207.9	196.713		151	162.444		331	352.308	95.5836	220	229.607	98.5674		209.023	-22.2843	407.097	-13.4586	265.426	-13.4948					1.41346			178.852		-17.8607
20240830	218.3	196.857		151	162.591		368	352.659	95.5821	231	229.874	98.5637		209.25	-22.2982	407.539	-13.4664	265.714	-13.4883					1.41382			178.967		-17.8905
20240831	235.9	197.047		176	162.776		377	353.049	95.5813	249	230.073	98.5645		209.549	-22.3207	408.122	-13.4943	266.094	-13.5369					1.41343			179.094		-17.9533
20240901	229.5	197.24		168	163.049		395	353.676	95.5769	258	230.48	98.5578		209.854	-22.3035	408.715	-13.4663	266.481	-13.51					1.41356			179.298		-17.942
20240902	241.8	197.464		182	163.299		481	354.202	95.5749	287	230.86	98.5534		210.206	-22.3146	409.401	-13.4829	266.928	-13.5122					1.41372			179.47		-17.9943
20240903	246.3	197.71		175	163.523		475	354.698	95.574	295	231.132	98.554		210.594	-22.3517	410.157	-13.5212	267.421	-13.5698					1.41346			179.632		-18.0787
20240904	249.8	197.952		171	163.744		394	355.278	95.5718	249	231.531	98.5497		210.975	-22.387	410.898	-13.5362	267.904	-13.5769					1.41398			179.821		-18.1315
20240905	244.6	198.218		171	164.008		408	355.779	95.5714	247	231.938	98.5462		211.393	-22.4155	411.713	-13.5857	268.436	-13.5967					1.41418			179.984		-18.2339
20240906	252.8	198.483		177	164.292		437	356.305	95.5706	283	232.301	98.5442		211.811	-22.4349	412.528	-13.6288	268.967	-13.632					1.41396			180.156		-18.3278
20240907	225	198.782		170	164.552		434	356.866	95.5702	272	232.672	98.5434		212.281	-22.4838	413.443	-13.6844	269.563	-13.6855					1.41397			180.338		-18.4435
20240908	231	199.06		157	164.84		412	357.646	95.5658	275	233.139	98.5382		212.719	-22.508	414.296	-13.6739	270.119	-13.6903					1.41433			180.592		-18.4673
20240909	217.8	199.371		151	165.211		359	358.326	95.564	222	233.602	98.5347		213.209	-22.5123	415.25	-13.7084	270.742	-13.718					1.41396			180.814		-18.5566
20240910	207.9	199.686		141	165.597		321	358.911	95.5637	207	233.991	98.5339		213.705	-22.5112	416.216	-13.7681	271.371	-13.7744					1.41301			181.005		-18.6808
20240911	209.6	199.987		147	165.949		251	359.645	95.5607	160	234.449	98.5301		214.179	-22.5187	417.14	-13.783	271.974	-13.7973					1.41278			181.244		-18.7425
20240912	203.7	200.3		132	166.312		267	360.412	95.5575	182	234.979	98.5242		214.672	-22.5274	418.099	-13.7975	272.599	-13.8008					1.41288			181.494		-18.8053
20240913	188.1	200.62		109	166.734		298	361.259	95.5534	205	235.487	98.5194		215.176	-22.5129	419.081	-13.7975	273.24	-13.8167					1.41235			181.77		-18.8495
20240914	174.4	200.934		107	167.228		298	362.199	95.5476	204	236.048	98.5124		215.671	-22.4614	420.045	-13.7714	273.868	-13.8098					1.41153			182.077		-18.8572
20240915	174.6	201.187		97	167.684		325	362.878	95.5442	196	236.4	98.5104		216.069	-22.3933	420.82	-13.7688	274.373	-13.84					1.40979			182.298		-18.8884
20240916	170.9	201.41		132	168.096		331	363.245	95.5448	244	236.677	98.5099		216.421	-22.3293	421.505	-13.8221	274.82	-13.8794					1.40799			182.418		-18.9924
20240917	167	201.559		133	168.306		277	363.575	95.5438	164	236.895	98.5084		216.655	-22.3162	421.961	-13.8369	275.117	-13.8932					1.40753			182.525		-19.0333
20240918	164.8	201.708		102	168.465		295	364.079	95.5402	207	237.167	98.5049		216.89	-22.3271	422.419	-13.8109	275.416	-13.8876					1.40781			182.69		-19.0181
20240919	162.6	201.83		105	168.665		328	364.46	95.5378	234	237.336	98.504		217.082	-22.3033	422.792	-13.7969	275.659	-13.9023					1.40714			182.814		-19.0156
20240920	155	201.927		115	168.708		305	364.427	95.5409	204	237.196	98.5131		217.234	-22.3383	423.09	-13.8654	275.853	-14.0139					1.40595			182.803		-19.1235
20240921	159.2	201.952		124	168.733		303	364.527	95.5401	195	237.223	98.5132		217.275	-22.341	423.168	-13.8577	275.904	-14.0197					1.40591			182.836		-19.1164
20240922	164	201.919		131	168.799		297	364.821	95.5348	212	237.435	98.5042		217.223	-22.2922	423.067	-13.7677	275.839	-13.9225					1.40661			182.932		-18.9878
20240923	168.5	201.955		122	168.834		276	364.982	95.5333	206	237.554	98.5014		217.279	-22.2961	423.176	-13.7518	275.91	-13.9015					1.40703			182.984		-18.9707
20240924	173.4	202.013		133	168.86		357	365.335	95.5295	256	237.81	98.4947		217.37	-22.3166	423.354	-13.7046	276.025	-13.8449					1.40832			183.099		-18.9135
20240925	175.2	202.124		128	169		322	365.673	95.5275	225	237.973	98.4936		217.545	-22.3151	423.696	-13.6945	276.248	-13.8554					1.40812			183.209		-18.9148
20240926	182	202.252		136	169.255		382	366.288	95.5217	267	238.406	98.4835		217.747	-22.2703	424.089	-13.6296	276.505	-13.7785					1.40857			183.41		-18.8426
20240927	186.7	202.39		156	169.58		397	367.11	95.5131	245	238.881	98.4724		217.964	-22.1983	424.511	-13.5217	276.78	-13.6929					1.40866			183.678		-18.7122
20240928	195.2	202.553		155	169.995		483	368.12	95.5024	320	239.452	98.459		218.221	-22.0996	425.012	-13.3861	277.107	-13.5886					1.40858			184.007		-18.5462
20240929	197.8	202.845		149	170.544		471	369.213	95.494	324	240.065	98.4496		218.681	-22.0124	425.906	-13.3112	277.69	-13.5492					1.40764			184.363
20240930	214.7	203.166		165	171.042		564	370.353	95.4857	378	240.833	98.436		219.187	-21.9654	426.893	-13.2443	278.333	-13.4731					1.40803			184.735
20241001	245.1	203.552		212	171.688		523	371.542	95.4786	333	241.664	98.4229		219.794	-21.8867	428.075	-13.2063	279.103	-13.4143					1.40757
20241002	274.8	203.976		210	172.308		441	372.592	95.4745	277	242.305	98.4182		220.463	-21.8423	429.377	-13.2251	279.953	-13.4478					1.40623
20241003	312.1	204.409		209	172.939		510	373.722	95.4696	311	243.005	98.4117		221.145	-21.7984	430.706	-13.2305	280.819	-13.4657					1.40515
20241004	291.1	204.837		211	173.528		431	374.739	95.4661	292	243.664	98.4065		221.818	-21.77	432.017	-13.2582	281.674	-13.4944					1.40417
20241005	277.1	205.236		182	173.981		458	375.562	95.4648	289	244.095	98.408		222.447	-21.7876	433.242	-13.3136	282.472	-13.5861					1.403
20241006	264.2	205.627		169	174.429		469	376.416	95.4628	315	244.785	98.4003		223.063	-21.803	434.442	-13.3563	283.254	-13.5814					1.40335
20241007	243.2	206.013		163	174.861		365	377.365	95.4593	253	245.312	98.398		223.671	-21.8222	435.626	-13.3741	284.027	-13.6306					1.4029
20241008	224.2	206.402		142	175.332		352	378.246	95.4568	235	245.976	98.3911		224.283	-21.8257	436.818	-13.4087	284.804	-13.6333					1.40292
20241009	219.7	206.796		141	175.913		341	379.015	95.4562	222	246.481	98.39		224.904	-21.7831	438.027	-13.4724	285.592	-13.695					1.40115
20241010	215.6	207.16		141	176.5		394	379.995	95.4517	218	247.024	98.3862		225.477	-21.7217	439.144	-13.4692	286.321	-13.7245					1.39957
20241011	213.1	207.466		136	176.922		348	380.946	95.4461	239	247.593	98.3793		225.96	-21.702	440.083	-13.4377	286.933	-13.7104					1.39945
20241012	212.6	207.737		126	177.368		319	381.616	95.4436	226	248	98.3765		226.386	-21.6524	440.913	-13.4487	287.474	-13.7312					1.39823
20241013	193.9	207.963		137	177.65		352	382.302	95.4397	225	248.505	98.3686		226.741	-21.6507	441.605	-13.4291	287.925	-13.6912					1.39884
20241014	180.9	208.104		136	177.797		280	382.741	95.4372	195	248.776	98.3651		226.963	-21.6626	442.038	-13.4143	288.207	-13.6815					1.39921
20241015	170.9	208.178		109	177.831		334	383.12	95.4337	197	249.07	98.3582		227.08	-21.688	442.265	-13.3732	288.355	-13.624					1.4006
20241016	166.6	208.218		119	177.815		299	383.191	95.4338	197	249.151	98.3571		227.143	-21.7166	442.387	-13.3811	288.435	-13.6199					1.40118
20241017	172.2	208.167		141	177.658		359	382.535	95.4418	249	248.601	98.3736		227.064	-21.7584	442.234	-13.4993	288.335	-13.7805					1.39932
20241018	163.9	208.063		137	177.429		326	381.878	95.4484	241	248.02	98.389		226.9	-21.8027	441.914	-13.5854	288.126	-13.9196					1.39785
20241019	160.9	208.026		133	177.112		304	381.434	95.4538	202	247.684	98.3989		226.841	-21.9225	441.8	-13.6637	288.052	-14.0142					1.39846
20241020	160.3	208.008		132	176.832		313	380.579	95.4656	201	247.21	98.4142		226.812	-22.0361	441.744	-13.8461	288.016	-14.1677					1.398
20241021	162.4	207.949		162	176.554		312	379.866	95.4743	236	246.696	98.4294		226.72	-22.127	441.565	-13.9727	287.899	-14.3116					1.39728
20241022	174.3	207.84		119	176.098		299	378.984	95.4841	165	246.119	98.4447		226.548	-22.2689	441.229	-14.107	287.68	-14.4468					1.39763
20241023	183.7	207.768		122	175.632		294	378.328	95.4918	196	245.516	98.4625		226.435	-22.4361	441.01	-14.2132	287.537	-14.6142					1.3979
20241024	194.4	207.802		136	175.24		406	378.157	95.4951	264	245.283	98.4719		226.488	-22.6273	441.112	-14.2718	287.603	-14.7149					1.3997
20241025	206.8	208.006		178	175.063		468	377.879	95.5046	317	245.147	98.4849		226.809	-22.8149	441.738	-14.4563	288.012	-14.8829					1.40034
20241026	235.5	208.287		220	175.242		520	377.905	95.5116	347	245.116	98.4975		227.252	-22.8864	442.6	-14.6171	288.574	-15.0594					1.39873
20241027	243	208.571		246	175.434		517	378.356	95.5126	309	245.42	98.4985		227.699	-22.9537	443.472	-14.6831	289.142	-15.1212					1.39893
20241028	252.1	208.925		246	175.734		605	379.048	95.5118	334	245.749	98.5016		228.257	-23.0105	444.558	-14.7359	289.85	-15.2153					1.39841
20241029	261.9	209.296		224	176.139		453	380.059	95.5069	267	246.355	98.4957		228.842	-23.0302	445.697	-14.7269	290.593	-15.2233					1.39864
20241030	265.9	209.711		206	176.618		480	380.708	95.5085	335	246.811	98.4968		229.495	-23.0406	446.97	-14.8246	291.423	-15.3083					1.39743
20241031	265.92	210.105		213	176.946		476	381.087	95.5133	291	246.973	98.5072		230.115	-23.1055	448.177	-14.9695	292.21	-15.481					1.39575
20241101	252.2	210.464		220	177.125		484	381.503	95.5167	306	247.197	98.514		230.68	-23.2163	449.277	-15.0853	292.927	-15.6116					1.39561
20241102	246.6	210.747		210	177.219			381.753	95.5205		247.242	98.5239		231.127	-23.3241	450.147	-15.1937	293.494	-15.7592					1.39512
20241103																								#DIV/0!
20241104																								#DIV/0!
20241105																								#DIV/0!
20241106																								#DIV/0!
20241107																								#DIV/0!
20241108																								#DIV/0!
20241109																								#DIV/0!
20241110																								#DIV/0!
20241111																								#DIV/0!
20241112																								#DIV/0!
20241113																								#DIV/0!
20241114																								#DIV/0!
20241115																								#DIV/0!
20241116																								#DIV/0!
20241117																								#DIV/0!
20241118																								#DIV/0!
20241119																								#DIV/0!
20241120																								#DIV/0!
20241121																								#DIV/0!
20241122																								#DIV/0!
20241123																								#DIV/0!
20241124																								#DIV/0!
20241125																								#DIV/0!
20241126																								#DIV/0!
20241127																								#DIV/0!
20241128																								#DIV/0!
20241129																								#DIV/0!
20241130																								#DIV/0!
20241201																								#DIV/0!
20241202																								#DIV/0!
20241203																								#DIV/0!
20241204																								#DIV/0!
20241205																								#DIV/0!
20241206																								#DIV/0!
20241207																								#DIV/0!
20241208																								#DIV/0!
20241209																								#DIV/0!
20241210																								#DIV/0!
20241211																								#DIV/0!
20241212																								#DIV/0!
20241213																								#DIV/0!
20241214																								#DIV/0!
20241215																								#DIV/0!
20241216																								#DIV/0!
20241217																								#DIV/0!
20241218																								#DIV/0!
20241219																								#DIV/0!
20241220																								#DIV/0!
																								#DIV/0!
																								#DIV/0!
																								#DIV/0!
																								#DIV/0!
																								#DIV/0!
																								#DIV/0!
																								#DIV/0!
																								#DIV/0!
																								#DIV/0!
																								#DIV/0!
																								#DIV/0!
																								#DIV/0!
																								#DIV/0!
																								#DIV/0!
																								#DIV/0!
																								#DIV/0!
																								#DIV/0!
																								#DIV/0!
																								#DIV/0!
																								#DIV/0!
																								#DIV/0!
																								#DIV/0!
																								#DIV/0!
																								#DIV/0!
																								#DIV/0!
																								#DIV/0!
																								#DIV/0!
																								#DIV/0!
																								#DIV/0!
																								#DIV/0!
																								#DIV/0!
																								#DIV/0!
																								#DIV/0!
																								#DIV/0!
																								#DIV/0!
																								#DIV/0!
																								#DIV/0!
																								#DIV/0!
																								#DIV/0!
																								#DIV/0!
																								#DIV/0!
																								#DIV/0!
																								#DIV/0!
																								#DIV/0!
																								#DIV/0!
																								#DIV/0!
																								#DIV/0!
																								#DIV/0!
																								#DIV/0!
																								#DIV/0!
																								#DIV/0!
																								#DIV/0!
																								#DIV/0!
																								#DIV/0!
																								#DIV/0!
																								#DIV/0!
																								#DIV/0!
																								#DIV/0!
																								#DIV/0!
																								#DIV/0!
																								#DIV/0!
																								#DIV/0!
																								#DIV/0!
																								#DIV/0!
																								#DIV/0!
																								#DIV/0!
																								#DIV/0!
																								#DIV/0!
																								#DIV/0!
																								#DIV/0!
																								#DIV/0!
																								#DIV/0!
																								#DIV/0!
																								#DIV/0!
																								#DIV/0!
																								#DIV/0!
																								#DIV/0!
																								#DIV/0!
																								#DIV/0!
																								#DIV/0!
																								#DIV/0!
																								#DIV/0!
																								#DIV/0!
																								#DIV/0!
																								#DIV/0!
																								#DIV/0!
																								#DIV/0!
																								#DIV/0!
																								#DIV/0!
																								#DIV/0!
																								#DIV/0!
																								#DIV/0!
																								#DIV/0!
																								#DIV/0!
																								#DIV/0!
																								#DIV/0!
																								#DIV/0!
																								#DIV/0!
																								#DIV/0!
																								#DIV/0!
																								#DIV/0!
																								#DIV/0!
																								#DIV/0!
																								#DIV/0!
																								#DIV/0!
																								#DIV/0!
																								#DIV/0!
																								#DIV/0!
																								#DIV/0!
																								#DIV/0!
																								#DIV/0!
																								#DIV/0!
																								#DIV/0!
																								#DIV/0!
																								#DIV/0!
																								#DIV/0!
																								#DIV/0!
																								#DIV/0!
																								#DIV/0!
																								#DIV/0!
																								#DIV/0!
																								#DIV/0!
																								#DIV/0!
																								#DIV/0!
																								#DIV/0!
																								#DIV/0!
																								#DIV/0!
																								#DIV/0!
																								#DIV/0!
																								#DIV/0!
																								#DIV/0!
																								#DIV/0!
																								#DIV/0!
																								#DIV/0!
																								#DIV/0!
																								#DIV/0!
																								#DIV/0!
																								#DIV/0!
																								#DIV/0!
																								#DIV/0!
																								#DIV/0!
																								#DIV/0!
																								#DIV/0!
																								#DIV/0!
																								#DIV/0!
																								#DIV/0!
																								#DIV/0!
																								#DIV/0!
																								#DIV/0!
																								#DIV/0!
																								#DIV/0!
																								#DIV/0!
																								#DIV/0!
																								#DIV/0!
																								#DIV/0!
																								#DIV/0!
																								#DIV/0!
																								#DIV/0!
																								#DIV/0!
																								#DIV/0!
																								#DIV/0!
																								#DIV/0!
																								#DIV/0!
																								#DIV/0!
																								#DIV/0!
																								#DIV/0!
																								#DIV/0!
																								#DIV/0!
																								#DIV/0!
																								#DIV/0!
																								#DIV/0!
																								#DIV/0!
																								#DIV/0!
																								#DIV/0!
																								#DIV/0!
																								#DIV/0!
																								#DIV/0!
																								#DIV/0!
																								#DIV/0!
																								#DIV/0!
																								#DIV/0!
																								#DIV/0!
																								#DIV/0!
																								#DIV/0!
																								#DIV/0!
																								#DIV/0!
																								#DIV/0!
																								#DIV/0!
																								#DIV/0!
																								#DIV/0!
																								#DIV/0!
																								#DIV/0!
																								#DIV/0!
																								#DIV/0!
																								#DIV/0!
																								#DIV/0!
																								#DIV/0!
																								#DIV/0!
																								#DIV/0!
																								#DIV/0!
																								#DIV/0!
																								#DIV/0!
																								#DIV/0!
																								#DIV/0!
																								#DIV/0!
																								#DIV/0!
																								#DIV/0!
																								#DIV/0!
																								#DIV/0!
					2023-09-01	20:00:00	2460189322	2274920
					2023-09-02	20:00:00	2460190322	2274960
					2023-09-03	20:00:00	2460191322	2274990
					2023-09-04	20:00:00	2460192322	2275030
					2023-09-05	20:00:00	2460193322	2275070
					2023-09-06	20:00:00	2460194322	2275100
					2023-09-07	20:00:00	2460195322	2275140
					2023-09-08	20:00:00	2460196322	2275180
					2023-09-09	20:00:00	2460197322	2275210
					2023-09-10	20:00:00	2460198322	2275250
					2023-09-11	20:00:00	2460199322	2275290
					2023-09-12	20:00:00	2460200322	2275320
					2023-09-13	20:00:00	2460201322	2275360
					2023-09-14	20:00:00	2460202322	2275400
					2023-09-15	20:00:00	2460203322	2275430
					2023-09-16	20:00:00	2460204322	2275470
					2023-09-17	20:00:00	2460205322	2275510
					2023-09-18	20:00:00	2460206322	2275540
					2023-09-19	20:00:00	2460207322	2275580
					2023-09-20	20:00:00	2460208322	2275620
					2023-09-21	20:00:00	2460209322	2275650
					2023-09-22	20:00:00	2460210322	2275690
					2023-09-23	20:00:00	2460211322	2275730
					2023-09-24	20:00:00	2460212322	2275760
					2023-09-25	20:00:00	2460213322	2275800
					2023-09-26	20:00:00	2460214322	2275840
					2023-09-27	20:00:00	2460215322	2275870
					2023-09-28	20:00:00	2460216322	2275910
					2023-09-29	20:00:00	2460217322	2275950
					2023-09-29	23:00:00	2460217447	2275950

## Sheet: SOLEN
																																				2024
1		320	311		224	217						January		February		March		April		May		June		July		August		September		October		November		December		January		February		March		April		May		June		July
2		285	305		191	206						147.5		129.6		159		125.1		150.1		168.5		171		179.9		138.3		161.5		156.2		157.6		131.2		132.9		150.1		120.3		136.9		193.3		176.3
3		300	336		177	239						141.5		131		165.8		126.7		159.2		166.9		175.9		178.1		133.6		157.7		155.9		144		137.4		138.5		149.7		112.7		144.1		185		169.3
4		265	316		197	196						143.6		130.7		172.6		133.5		158.7		169.3		179		167.7		132.8		153.8		153.6		135.2		135.5		152		142.7		111.7		158.6		191.4		173.1
5		240	315		174	235						146		135.1		178.6		135.7		164.7		173.2		172.8		175.8		138.4		155.1		152.7		133.9		142.2		165.6		137.6		113.8		169.5		198		178.8
6		317	346		172	223						149.2		140		176.8		136.7		164.7		174.1		159.8		180.8		145.2		156.1		152.2		137.5		147.6		168.6		139.2		120.6		180		201.1		171.2
7		353	381		181	242						166.7		152.4		185		137.2		154.5		176.9		162.9		178.5		149.4		155.3		143.6		126.1		154.1		174.1		133.9		123.1		174.3		196.7		171.6
8		322	401		160	248						173		179.7		177.5		136.6		160		172.1		166.8		174.5		163.3		157		142.5		130.6		161.6		183.3		134.5		124.9		207.4		190		177.1
9		370	429		156	262						177.8		192.3		179.2		136.2		175.1		173.6		165.9		163.4		163.4		156.8		143.1		128.6		170.4		180		127.2		125.2		231.4		196.2		174.1
10		293	438		190	266						184.7		209.1		176.2		140.7		171.7		169.3		185.2		157.7		163.7		165.2		136.1		124.1		170.1		178.6		132.6		124.8		237.7		186.4		184.2
11		305	401		212	272						186.6		202.3		168.8		140.3		173.4		166.1		196.9		160		166.2		163.9		141.1		122.8		179.9		188.7		125.3		131.8		227.9		183.3		220.8
12		290	410		230	312						188.7		204.1		155.3		144		166.7		158.6		220.6		157		178.8		157.5		138.7		122.1		186.2		175.7		125.1		144.4		218		170.1		211.9
13		223	450		242	267						204.7		194.6		148.1		154.7		152.2		150.7		199.7		152.2		155.5		156.4		134.4		122.3		180.3		203		128.9		152.3		226.4		170		216.7
14		196	354		249	252						201.7		183.3		141.5		160.4		146.8		150.9		209.7		154.4		144.4		148.4		130		130.7		179.4		189.9		126.8		161.9		220		175.5		246.3
15		236	418		254	269						220.4		175.3		136.9		172.3		142.7		148		186.6		158.1		146.9		147.4		121.2		143.4		181.7		179.5		125.7		179.5		224.6		174.3		241.7
16		271	469		276	276						226.7		169.5		134.2		176.9		137.4		157.9		184.5		162.1		140.6		143.8		116.4		139.8		176.6		173.9		127.7		193.2		220.8		176.1		240.9
17		236	382		269	254						220.7		159.2		133.9		179.1		137.3		162.2		190.4		164.2		141.9		143.1		115.3		144.3		173.8		164.8		142.6		200.2		211.9		172.6		249.9
18		271	400		252	249						214.6		161.1		132.9		167.8		141		163.2		185.9		155.7		146.1		136.4		116.9		149.7		168.5		165.9		149.8		218.2		208.7		185.7		231.1
19		268	383		267	242						213.2		163.6		139		154.4		154.1		169.4		204		154.4		156		134.3		124.2		156.3		157.1		152.9		167.4		228.8		198.8		199		215.5
20		243	329		312	230						218.9		165.2		141.4		148.3		168.5		174.3		195.1		154.3		167.6		127.7		136.8		173.5		152.4		148.6		167.5		215.4		205.5		202.3		208.2
21		265	313		272	212						210.6		156.3		154.8		148.4		173.7		186		190.3		149.8		156.8		124.6		152.8		189.1		161		149.2		174.1		211.6		204.5		210		214.1
22		286	274		266	190						202.1		157.4		150.4		142		167.3		182.2		178.5		152.2		169.4		121.4		167.3		187.4		172.9		166.2		179.9		219.4		195.4		203.3		204.2
23		333	249		262	156						192.3		148.6		157.7		142.7		165.5		178.8		180		154.4		177		117.6		184.8		180.7		189.9		169.6		196.2		229.2		200.6		202.1		191
24		308	219		248	160						183.2		145.1		150		136.7		158.8		175.2		178		150.3		174.1		120.8		189.3		168.6		174.7		169.2		209.3		221.6		180.7		202.2		181
25		264	263		242	181						174.6		160.7		156.6		135.5		168.2		166.1		170.3		147.3		174.8		119.8		173.5		177.4		166.6		175.5		194		201.4		167		205.3		180.4
26		239	261		223	172		325.4				166.5		149.4		159.4		132.3		156		159.9		174.4		141.9		171.1		124.4		171.9		161.3		155.6		177.1		189.1		168.8		156.4		200.1		172.4
27		246	287		235	174		205.4				146		155.9		158.6		138.2		152.9		162.9		172.6		142.2		165.7		124.9		175.5		149.1		151.9		168.3		177.4		154.6		159.7		187.4		181.8
28		231	306		196	197						140.5		158.1		157.5		142.6		161.1		156.2		170.5		144.5		156.7		125.9		175.1		144.5		143.6		165.1		173.9		154.6		174.6		188.6		186.7
29		220	262		239	177						133.4		157.9		158.1		151.8		155.4		160.1		173.4		144.5		148.4		126.3		176.7		141.8		136.8		164.1		172.1		142		170.9		186.7		221.1
30		231	277		206	191						132.9		163.125		147.3		158		158.6		167.6		184.1		145		155.5		133.3		166		138.2		136.1		161.1		166.8		139.5		175.2		192.7		230
31		249	347		217	224						131.9				140		155.8		166.5		163.9		179.7		141.2		159.5		137.7		162		135.1		131		168.341		139.3		132.1		177.7		179.6		228.9
			342.968			225.516						132.9				129		146.353		165.9		166.803		182.4		142.5		156.037		145.1		150.193		141.4		132.2		168.341		133.4		162.587		184.5		190.167		242.2
												176.552				155.552				158.99				182.158		157.568				141.91				146.358		159.3				152.897				191.926				202.984
											SOLEN	176.6		163.2		155.6		146.4		159.2		166.8		182.2		157.6		156		141.9		150.2		146.4		159.3		168.3		152.9
	31
	30	395			258			523	333
	29	481			287			441	277
	28	475			295			510	311
	27	394			249			431	292
	26	408			247			458	289
	25	437			283			469	315
	24	434			272			365	253
	23	412			275			352	235
	22	359			222			341	222
	21	321			207			394	218
	20	251			160			348	239
	19	267			182			319	226
	18	298			205			352	225
	17	298			204			280	195
	16	325			196			334	197
	15	331			244			299	197
	14	277			164			359	249
	13	295			207			326	241
	12	319			226			304	202
	11	348			239			313	201
	10	394			218			312	236
	9	341			222			299	165
	8	352			235			294	196
	7	365			253			406	264
	6	469			315			468	317
	5	458			289			520	347
	4	431			292			517	309
	3	510			311			605	334
	2	441			277			453	267
	1	523			333			480	335
								476	291
								398.323	257.355
								398.3	257.4
20241012	213.6			319	226	95	19.1	19	1948-06-01	32254333	3234431*	31144255	533-831	25
20241011	213.9			348	239	130	118.9	119	18-236	88887434	87876443	87765445	606-988	12	3
20241010	216.3			394	218	150	97.3	97	6-300	23234889	22124868	34235857	397-831	21	5
20241009	220.3			341	222	107	17.9	18	1932-06-01	44433222	45544322	56434445	422-525	12	2	2
20241008	224.7			352	235	165	56.1	56	18-132	77643444	57644435	67534546	412-502	19	3
20241007	243.5			365	253	164	53.5	54	18-94	65356565	53255454	65344674	440-594	30	2	2
20241006	264.5			469	315	167	12.8	13	0-32	10213334	11323334	122336	390-579	41	6
20241005	277.3			458	289	173	5.8	6	2024-12-03	31212121	11212322	40101123	374-453	43	6
20241004	291.0			431	292	181	8.0	8	2018-05-01	22212223	22112323	32122225	375-441	34	7
20241003	311.9	273.0	273.3	510	311	229	7.0	7	2015-04-01	11223122	1223332	21113122	341-397	20	15	1
20241002	274.4	239.6	240.0	441	277	194	5.6	6	2024-09-03	22222111	22122321	33122022	345-417	43	9
20241001	244.6	219.1	219.6	523	333	196	5.4	5	2024-09-03	22111211	12112323	23101220	407-494	35	2	1
				280
				402.385
[truncated: 3 more columns]
